# Supplementary material for: Developing bottom drifters to better understand the stranding locations of cold-stunned sea turtles in Cape Cod Bay, Massachusetts
Source: PeerJ journal article supplement (doi:10.7717/peerj.15866), 2023-08-30

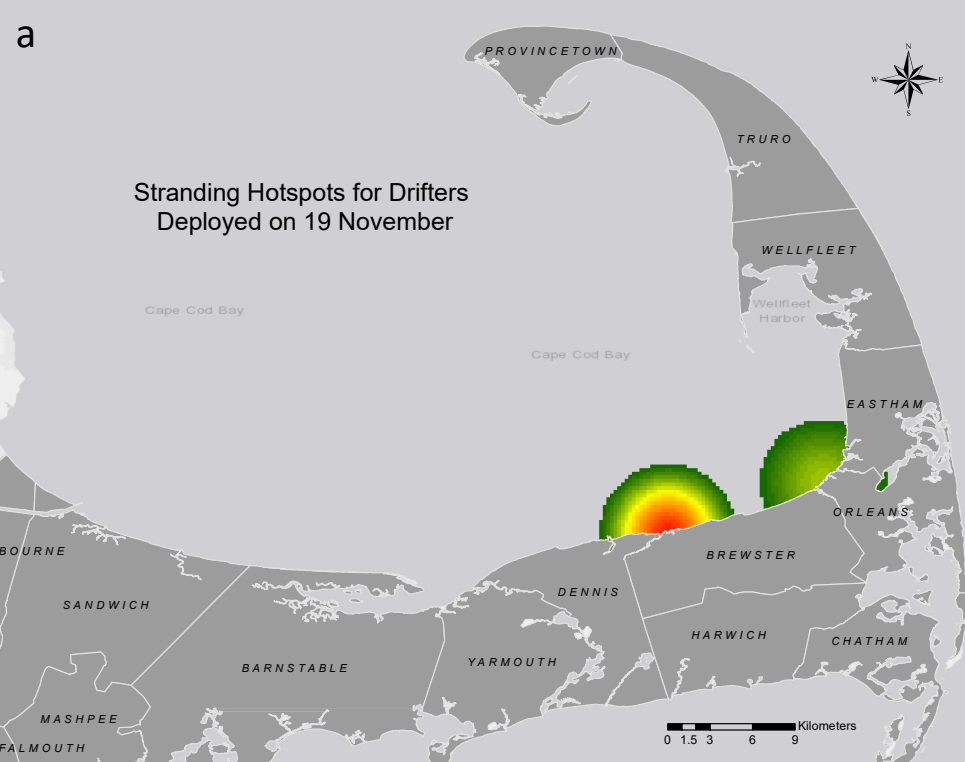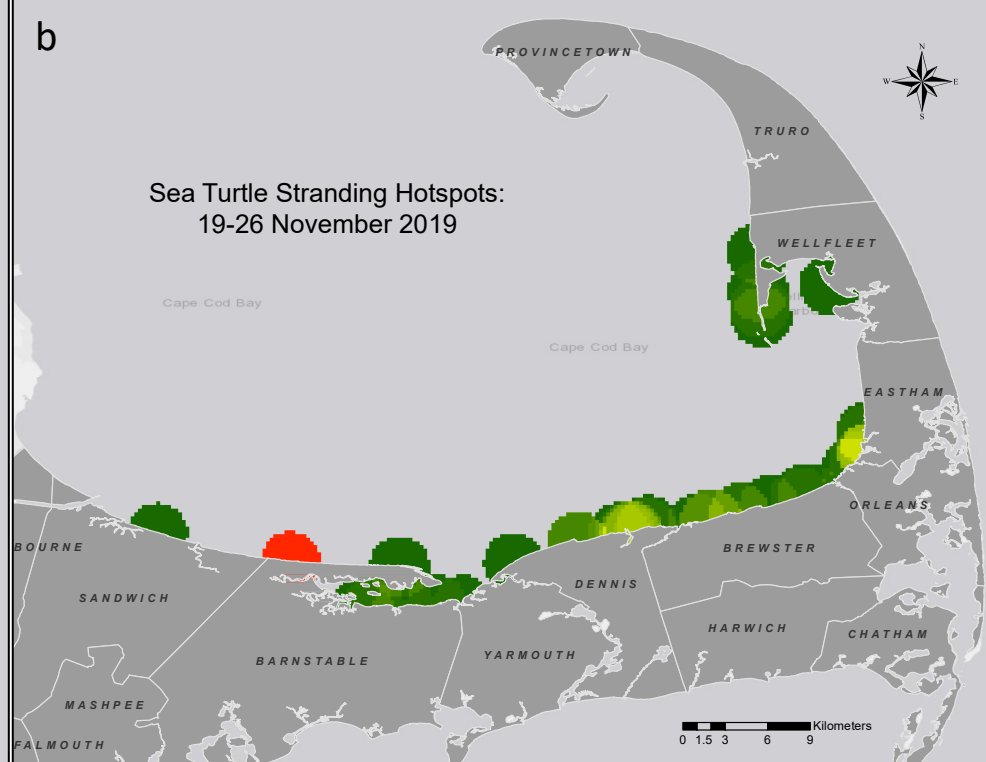

Supplement: FigureS1.pdf [file FigureS1.pdf]
