# Supplementary material for: Developing bottom drifters to better understand the stranding locations of cold-stunned sea turtles in Cape Cod Bay, Massachusetts
Source: PeerJ. 2023 Aug 30;11:e15866. doi: 10.7717/peerj.15866 (PMC10474834; doi:10.7717/peerj.15866)
Supplement: Supplemental Information 3 [file peerj-11-15866-s003.xlsx]

## Sheet: Sheet1
ESN	SeqNo	ESN	Unit Name	Message Time GMT	Message Subtype	Battery Condition	GPS Data	Missed Alarm	GPS Fail Counter	Longitude	Latitude	Message Trigger	Message Trigger State	Inputs 1-2	Alarms 1-2	Moving	GPS Fix Confidence	Message Time GMT
0-1367843		1367843	A-Felicia	2019-11-14 14:37:00	Turned On	Good	Valid	N/A	1	-70.1726	41.774	N/A		11	0	N	High	2019-11-14 14:37:00
0-1367843		1367843	A-Felicia	2019-11-14 15:46:00	Location	Good	Valid	N/A	0	-70.1321	41.8984	N/A		11	0	N	High	2019-11-14 15:46:00
0-1367843		1367843	A-Felicia	2019-11-14 16:41:00	Location	Good	Valid	N/A	0	-70.1206	41.9135	N/A		11	0	N	High	2019-11-14 16:41:00
0-1367843		1367843	A-Felicia	2019-11-14 17:42:00	Location	Good	Valid	N/A	0	-70.1165	41.9424	N/A		11	0	N	High	2019-11-14 17:42:00
0-1367843		1367843	A-Felicia	2019-11-14 18:43:00	Location	Good	Valid	N/A	0	-70.1261	41.9771	N/A		11	0	N	High	2019-11-14 18:43:00
0-1367843		1367843	A-Felicia	2019-11-14 19:37:00	Location	Good	Valid	N/A	0	-70.1384	42.0133	N/A		11	0	N	High	2019-11-14 19:37:00
0-1367843		1367843	A-Felicia	2019-11-14 20:40:00	Location	Good	Valid	N/A	0	-70.139	42.0573	N/A		11	0	N	High	2019-11-14 20:40:00
0-1367843		1367843	A-Felicia	2019-11-14 21:41:00	Location	Good	Valid	N/A	0	-70.1387	42.0575	N/A		11	0	N	High	2019-11-14 21:41:00
0-1367843		1367843	A-Felicia	2019-11-14 22:30:00	Location	Good	Valid	N/A	0	-70.1387	42.0575	N/A		11	0	N	High	2019-11-14 22:30:00
0-1367843		1367843	A-Felicia	2019-11-14 23:27:00	Location	Good	Valid	N/A	0	-70.1387	42.0575	N/A		11	0	N	High	2019-11-14 23:27:00
