# Supplementary material for: Developing bottom drifters to better understand the stranding locations of cold-stunned sea turtles in Cape Cod Bay, Massachusetts
Source: PeerJ. 2023 Aug 30;11:e15866. doi: 10.7717/peerj.15866 (PMC10474834; doi:10.7717/peerj.15866)
Supplement: Supplemental Information 7 [file peerj-11-15866-s007.xlsx]

## Sheet: Sheet1
ESN	SeqNo	ESN	Unit Name	Message Time GMT	Message Subtype	Battery Condition	GPS Data	Missed Alarm	GPS Fail Counter	Longitude	Latitude	Message Trigger	Message Trigger State	Inputs 1-2	Alarms 1-2	Moving	GPS Fix Confidence	Message Time GMT
0-3329687		3329687	GOMI	2019-11-14 15:27:00	Location	Good	Valid	N/A	0	-70.1414	41.89	N/A		11	0	N	High	2019-11-14 15:27:00
0-3329687		3329687	GOMI	2019-11-14 16:30:00	Location	Good	Valid	N/A	0	-70.1316	41.8961	N/A		11	0	N	High	2019-11-14 16:30:00
0-3329687		3329687	GOMI	2019-11-14 17:36:00	Location	Good	Valid	N/A	0	-70.1338	41.8972	N/A		11	0	N	High	2019-11-14 17:36:00
0-3329687		3329687	GOMI	2019-11-14 18:37:00	Location	Good	Valid	N/A	0	-70.138	41.902	N/A		11	0	N	High	2019-11-14 18:37:00
0-3329687		3329687	GOMI	2019-11-14 19:35:00	Location	Good	Valid	N/A	0	-70.1422	41.9076	N/A		11	0	N	Low	2019-11-14 19:35:00
0-3329687		3329687	GOMI	2019-11-14 20:43:00	Location	Good	Valid	N/A	0	-70.1457	41.9147	N/A		11	0	N	High	2019-11-14 20:43:00
0-3329687		3329687	GOMI	2019-11-14 21:52:00	Location	Good	Valid	N/A	0	-70.1483	41.9209	N/A		11	0	N	High	2019-11-14 21:52:00
0-3329687		3329687	GOMI	2019-11-14 22:49:00	Location	Good	Valid	N/A	0	-70.1499	41.9238	N/A		11	0	N	High	2019-11-14 22:49:00
0-3329687		3329687	GOMI	2019-11-14 23:55:00	Location	Good	Valid	N/A	0	-70.1491	41.9246	N/A		11	0	N	High	2019-11-14 23:55:00
0-3329687		3329687	GOMI	2019-11-15 00:50:00	Location	Good	Valid	N/A	0	-70.148	41.9234	N/A		11	0	N	High	2019-11-15 00:50:00
0-3329687		3329687	GOMI	2019-11-15 01:55:00	Location	Good	Valid	N/A	0	-70.1456	41.9214	N/A		11	0	N	High	2019-11-15 01:55:00
0-3329687		3329687	GOMI	2019-11-15 02:50:00	Location	Good	Valid	N/A	0	-70.1434	41.9188	N/A		11	0	N	High	2019-11-15 02:50:00
0-3329687		3329687	GOMI	2019-11-15 03:42:00	Location	Good	Valid	N/A	0	-70.1409	41.9159	N/A		11	0	N	High	2019-11-15 03:42:00
0-3329687		3329687	GOMI	2019-11-15 04:41:00	Location	Good	Valid	N/A	0	-70.1385	41.9131	N/A		11	0	N	High	2019-11-15 04:41:00
0-3329687		3329687	GOMI	2019-11-15 05:45:00	Location	Good	Valid	N/A	0	-70.1363	41.9128	N/A		11	0	N	High	2019-11-15 05:45:00
0-3329687		3329687	GOMI	2019-11-15 06:39:00	Location	Good	Valid	N/A	0	-70.1351	41.9147	N/A		11	0	N	High	2019-11-15 06:39:00
0-3329687		3329687	GOMI	2019-11-15 07:45:00	Location	Good	Valid	N/A	0	-70.1333	41.9182	N/A		11	0	N	High	2019-11-15 07:45:00
0-3329687		3329687	GOMI	2019-11-15 08:45:00	Location	Good	Valid	N/A	0	-70.1323	41.922	N/A		11	0	N	High	2019-11-15 08:45:00
0-3329687		3329687	GOMI	2019-11-15 09:46:00	Location	Good	Valid	N/A	0	-70.1315	41.9272	N/A		11	0	N	High	2019-11-15 09:46:00
0-3329687		3329687	GOMI	2019-11-15 10:53:00	Location	Good	Valid	N/A	0	-70.1296	41.9313	N/A		11	0	N	High	2019-11-15 10:53:00
0-3329687		3329687	GOMI	2019-11-15 12:02:00	Location	Good	Valid	N/A	0	-70.1252	41.9326	N/A		11	0	N	High	2019-11-15 12:02:00
0-3329687		3329687	GOMI	2019-11-15 13:01:00	Location	Good	Valid	N/A	0	-70.1194	41.9318	N/A		11	0	N	High	2019-11-15 13:01:00
0-3329687		3329687	GOMI	2019-11-15 14:07:00	Location	Good	Valid	N/A	0	-70.1132	41.9308	N/A		11	0	N	High	2019-11-15 14:07:00
0-3329687		3329687	GOMI	2019-11-15 15:13:00	Location	Good	Valid	N/A	0	-70.1074	41.9307	N/A		11	0	N	High	2019-11-15 15:13:00
0-3329687		3329687	GOMI	2019-11-15 16:04:00	Location	Good	Valid	N/A	0	-70.1034	41.931	N/A		11	0	N	High	2019-11-15 16:04:00
0-3329687		3329687	GOMI	2019-11-15 17:15:00	Location	Good	Valid	N/A	0	-70.0991	41.933	N/A		11	0	N	High	2019-11-15 17:15:00
0-3329687		3329687	GOMI	2019-11-15 18:23:00	Location	Good	Valid	N/A	0	-70.0967	41.9396	N/A		11	0	N	High	2019-11-15 18:23:00
0-3329687		3329687	GOMI	2019-11-15 19:26:00	Location	Good	Valid	N/A	0	-70.0958	41.9495	N/A		11	0	N	High	2019-11-15 19:26:00
0-3329687		3329687	GOMI	2019-11-15 20:26:00	Location	Good	Valid	N/A	0	-70.0959	41.9588	N/A		11	0	N	High	2019-11-15 20:26:00
0-3329687		3329687	GOMI	2019-11-15 21:19:00	Location	Good	Valid	N/A	0	-70.096	41.9661	N/A		11	0	N	High	2019-11-15 21:19:00
0-3329687		3329687	GOMI	2019-11-15 22:29:00	Location	Good	Valid	N/A	0	-70.0969	41.9748	N/A		11	0	N	High	2019-11-15 22:29:00
0-3329687		3329687	GOMI	2019-11-15 23:36:00	Location	Good	Valid	N/A	0	-70.0973	41.9818	N/A		11	0	N	High	2019-11-15 23:36:00
0-3329687		3329687	GOMI	2019-11-16 00:42:00	Location	Good	Valid	N/A	0	-70.0955	41.9855	N/A		11	0	N	High	2019-11-16 00:42:00
0-3329687		3329687	GOMI	2019-11-16 01:34:00	Location	Good	Valid	N/A	0	-70.0933	41.9869	N/A		11	0	N	High	2019-11-16 01:34:00
0-3329687		3329687	GOMI	2019-11-16 02:41:00	Location	Good	Valid	N/A	0	-70.0895	41.9862	N/A		11	0	N	High	2019-11-16 02:41:00
0-3329687		3329687	GOMI	2019-11-16 03:32:00	Location	Good	Valid	N/A	0	-70.0866	41.9824	N/A		11	0	N	High	2019-11-16 03:32:00
0-3329687		3329687	GOMI	2019-11-16 04:27:00	Location	Good	Valid	N/A	0	-70.0841	41.9765	N/A		11	0	N	High	2019-11-16 04:27:00
0-3329687		3329687	GOMI	2019-11-16 05:35:00	Location	Good	Valid	N/A	0	-70.0821	41.9692	N/A		11	0	N	High	2019-11-16 05:35:00
0-3329687		3329687	GOMI	2019-11-16 06:43:00	Location	Good	Valid	N/A	0	-70.0818	41.9613	N/A		11	0	N	High	2019-11-16 06:43:00
0-3329687		3329687	GOMI	2019-11-16 07:34:00	Location	Good	Valid	N/A	0	-70.0815	41.9527	N/A		11	0	N	High	2019-11-16 07:34:00
0-3329687		3329687	GOMI	2019-11-16 08:40:00	Location	Good	Valid	N/A	0	-70.0806	41.9397	N/A		11	0	N	High	2019-11-16 08:40:00
0-3329687		3329687	GOMI	2019-11-16 09:38:00	Location	Good	Valid	N/A	0	-70.0796	41.9276	N/A		11	0	N	High	2019-11-16 09:38:00
0-3329687		3329687	GOMI	2019-11-16 10:31:00	Location	Good	Valid	N/A	0	-70.0808	41.9199	N/A		11	0	N	High	2019-11-16 10:31:00
0-3329687		3329687	GOMI	2019-11-16 13:47:00	Location	Good	Valid	N/A	0	-70.0795	41.9082	N/A		11	0	N	High	2019-11-16 13:47:00
0-3329687		3329687	GOMI	2019-11-16 14:37:00	Location	Good	Valid	N/A	0	-70.0771	41.9017	N/A		11	0	N	High	2019-11-16 14:37:00
0-3329687		3329687	GOMI	2019-11-16 15:30:00	Location	Good	Valid	N/A	0	-70.0756	41.8949	N/A		11	0	N	High	2019-11-16 15:30:00
0-3329687		3329687	GOMI	2019-11-16 16:22:00	Location	Good	Valid	N/A	0	-70.0728	41.8863	N/A		11	0	N	High	2019-11-16 16:22:00
0-3329687		3329687	GOMI	2019-11-16 17:30:00	Location	Good	Valid	N/A	0	-70.0708	41.8819	N/A		11	0	N	High	2019-11-16 17:30:00
0-3329687		3329687	GOMI	2019-11-16 18:26:00	Location	Good	Valid	N/A	0	-70.0727	41.8758	N/A		11	0	N	High	2019-11-16 18:26:00
0-3329687		3329687	GOMI	2019-11-16 19:31:00	Location	Good	Valid	N/A	0	-70.0877	41.8729	N/A		11	0	N	High	2019-11-16 19:31:00
0-3329687		3329687	GOMI	2019-11-16 20:38:00	Location	Good	Valid	N/A	0	-70.0985	41.8721	N/A		11	0	N	High	2019-11-16 20:38:00
0-3329687		3329687	GOMI	2019-11-16 21:34:00	Location	Good	Valid	N/A	0	-70.1071	41.8724	N/A		11	0	N	High	2019-11-16 21:34:00
0-3329687		3329687	GOMI	2019-11-16 22:33:00	Location	Good	Valid	N/A	0	-70.1189	41.8741	N/A		11	0	N	High	2019-11-16 22:33:00
0-3329687		3329687	GOMI	2019-11-16 23:40:00	Location	Good	Valid	N/A	0	-70.1291	41.8726	N/A		11	0	N	High	2019-11-16 23:40:00
0-3329687		3329687	GOMI	2019-11-17 00:31:00	Location	Good	Valid	N/A	0	-70.1338	41.8683	N/A		11	0	N	High	2019-11-17 00:31:00
0-3329687		3329687	GOMI	2019-11-17 01:30:00	Location	Good	Valid	N/A	0	-70.1357	41.8589	N/A		11	0	N	High	2019-11-17 01:30:00
0-3329687		3329687	GOMI	2019-11-17 02:20:00	Location	Good	Valid	N/A	0	-70.1308	41.8484	N/A		11	0	N	High	2019-11-17 02:20:00
0-3329687		3329687	GOMI	2019-11-17 03:21:00	Location	Good	Valid	N/A	0	-70.1258	41.8399	N/A		11	0	N	High	2019-11-17 03:21:00
0-3329687		3329687	GOMI	2019-11-17 04:13:00	Location	Good	Valid	N/A	0	-70.1239	41.8361	N/A		11	0	N	High	2019-11-17 04:13:00
0-3329687		3329687	GOMI	2019-11-17 05:08:00	Location	Good	Valid	N/A	0	-70.1201	41.8344	N/A		11	0	N	High	2019-11-17 05:08:00
0-3329687		3329687	GOMI	2019-11-17 06:08:00	Location	Good	Valid	N/A	0	-70.1139	41.8337	N/A		11	0	N	High	2019-11-17 06:08:00
0-3329687		3329687	GOMI	2019-11-17 07:10:00	Location	Good	Valid	N/A	0	-70.1135	41.8351	N/A		11	0	N	High	2019-11-17 07:10:00
0-3329687		3329687	GOMI	2019-11-17 08:01:00	Location	Good	Valid	N/A	0	-70.1183	41.8369	N/A		11	0	N	High	2019-11-17 08:01:00
0-3329687		3329687	GOMI	2019-11-17 08:55:00	Location	Good	Valid	N/A	0	-70.1272	41.8383	N/A		11	0	N	High	2019-11-17 08:55:00
0-3329687		3329687	GOMI	2019-11-17 09:52:00	Location	Good	Valid	N/A	0	-70.1409	41.8401	N/A		11	0	N	High	2019-11-17 09:52:00
0-3329687		3329687	GOMI	2019-11-17 10:49:00	Location	Good	Valid	N/A	0	-70.1564	41.8437	N/A		11	0	N	High	2019-11-17 10:49:00
0-3329687		3329687	GOMI	2019-11-17 11:42:00	Location	Good	Valid	N/A	0	-70.1665	41.8456	N/A		11	0	N	High	2019-11-17 11:42:00
0-3329687		3329687	GOMI	2019-11-17 12:40:00	Location	Good	Valid	N/A	0	-70.1745	41.8447	N/A		11	0	N	High	2019-11-17 12:40:00
0-3329687		3329687	GOMI	2019-11-17 13:33:00	Location	Good	Valid	N/A	0	-70.1783	41.8399	N/A		11	0	N	High	2019-11-17 13:33:00
0-3329687		3329687	GOMI	2019-11-17 14:36:00	Location	Good	Valid	N/A	0	-70.1802	41.829	N/A		11	0	N	High	2019-11-17 14:36:00
0-3329687		3329687	GOMI	2019-11-17 15:38:00	Location	Good	Valid	N/A	0	-70.1794	41.8154	N/A		11	0	N	High	2019-11-17 15:38:00
0-3329687		3329687	GOMI	2019-11-17 16:45:00	Location	Good	Valid	N/A	0	-70.175	41.8047	N/A		11	0	N	High	2019-11-17 16:45:00
0-3329687		3329687	GOMI	2019-11-17 17:40:00	Location	Good	Valid	N/A	0	-70.1712	41.8003	N/A		11	0	N	High	2019-11-17 17:40:00
0-3329687		3329687	GOMI	2019-11-17 18:34:00	Location	Good	Valid	N/A	0	-70.1672	41.7982	N/A		11	0	N	High	2019-11-17 18:34:00
0-3329687		3329687	GOMI	2019-11-17 19:29:00	Location	Good	Valid	N/A	0	-70.1664	41.797	N/A		11	0	N	High	2019-11-17 19:29:00
0-3329687		3329687	GOMI	2019-11-17 20:26:00	Location	Good	Valid	N/A	0	-70.1694	41.7965	N/A		11	0	N	High	2019-11-17 20:26:00
0-3329687		3329687	GOMI	2019-11-17 21:33:00	Location	Good	Valid	N/A	0	-70.1762	41.7962	N/A		11	0	N	High	2019-11-17 21:33:00
0-3329687		3329687	GOMI	2019-11-17 22:25:00	Location	Good	Valid	N/A	0	-70.1831	41.7959	N/A		11	0	N	High	2019-11-17 22:25:00
0-3329687		3329687	GOMI	2019-11-17 23:31:00	Location	Good	Valid	N/A	0	-70.1931	41.7958	N/A		11	0	N	High	2019-11-17 23:31:00
0-3329687		3329687	GOMI	2019-11-18 00:27:00	Location	Good	Valid	N/A	0	-70.203	41.7961	N/A		11	0	N	High	2019-11-18 00:27:00
0-3329687		3329687	GOMI	2019-11-18 01:24:00	Location	Good	Valid	N/A	0	-70.2113	41.7949	N/A		11	0	N	Low	2019-11-18 01:24:00
0-3329687		3329687	GOMI	2019-11-18 02:19:00	Location	Good	Valid	N/A	0	-70.2158	41.7921	N/A		11	0	N	High	2019-11-18 02:19:00
0-3329687		3329687	GOMI	2019-11-18 03:27:00	Location	Good	Valid	N/A	0	-70.2168	41.7864	N/A		11	0	N	High	2019-11-18 03:27:00
0-3329687		3329687	GOMI	2019-11-18 04:26:00	Location	Good	Valid	N/A	0	-70.2174	41.7817	N/A		11	0	N	High	2019-11-18 04:26:00
0-3329687		3329687	GOMI	2019-11-18 05:16:00	Location	Good	Valid	N/A	0	-70.2173	41.7776	N/A		11	0	N	High	2019-11-18 05:16:00
0-3329687		3329687	GOMI	2019-11-18 06:20:00	Location	Good	Valid	N/A	0	-70.2172	41.7728	N/A		11	0	N	High	2019-11-18 06:20:00
0-3329687		3329687	GOMI	2019-11-18 07:13:00	Location	Good	Valid	N/A	0	-70.2186	41.7691	N/A		11	0	N	High	2019-11-18 07:13:00
0-3329687		3329687	GOMI	2019-11-18 08:08:00	Location	Good	Valid	N/A	0	-70.2222	41.7658	N/A		11	0	N	High	2019-11-18 08:08:00
0-3329687		3329687	GOMI	2019-11-18 09:12:00	Location	Good	Valid	N/A	0	-70.2286	41.7634	N/A		11	0	N	High	2019-11-18 09:12:00
0-3329687		3329687	GOMI	2019-11-18 10:15:00	Location	Good	Valid	N/A	0	-70.2352	41.7617	N/A		11	0	N	High	2019-11-18 10:15:00
0-3329687		3329687	GOMI	2019-11-18 11:04:00	Location	Good	Valid	N/A	0	-70.2431	41.76	N/A		11	0	N	High	2019-11-18 11:04:00
0-3329687		3329687	GOMI	2019-11-18 12:14:00	Location	Good	Valid	N/A	0	-70.2553	41.7592	N/A		11	0	N	High	2019-11-18 12:14:00
0-3329687		3329687	GOMI	2019-11-18 13:16:00	Location	Good	Valid	N/A	0	-70.266	41.7588	N/A		11	0	N	High	2019-11-18 13:16:00
0-3329687		3329687	GOMI	2019-11-18 14:09:00	Location	Good	Valid	N/A	0	-70.2743	41.7568	N/A		11	0	N	High	2019-11-18 14:09:00
0-3329687		3329687	GOMI	2019-11-18 15:05:00	Location	Good	Valid	N/A	0	-70.281	41.7528	N/A		11	0	N	High	2019-11-18 15:05:00
0-3329687		3329687	GOMI	2019-11-18 16:08:00	Location	Good	Valid	N/A	0	-70.2857	41.7467	N/A		11	0	N	High	2019-11-18 16:08:00
0-3329687		3329687	GOMI	2019-11-18 17:09:00	Location	Good	Valid	N/A	0	-70.2899	41.74	N/A		11	0	N	High	2019-11-18 17:09:00
0-3329687		3329687	GOMI	2019-11-18 18:20:00	Location	Good	Valid	N/A	0	-70.2892	41.7341	N/A		11	0	N	High	2019-11-18 18:20:00
0-3329687		3329687	GOMI	2019-11-18 19:28:00	Location	Good	Valid	N/A	0	-70.2859	41.7325	N/A		11	0	N	High	2019-11-18 19:28:00
0-3329687		3329687	GOMI	2019-11-18 21:20:00	Location	Good	Valid	N/A	0	-70.2859	41.7324	N/A		11	0	N	High	2019-11-18 21:20:00
0-3329687		3329687	GOMI	2019-11-18 22:28:00	Location	Good	Valid	N/A	0	-70.2859	41.7324	N/A		11	0	N	High	2019-11-18 22:28:00
0-3329687		3329687	GOMI	2019-11-18 23:41:00	Location	Good	Valid	N/A	0	-70.2859	41.7324	N/A		11	0	N	High	2019-11-18 23:41:00
