# Supplementary material for: Developing bottom drifters to better understand the stranding locations of cold-stunned sea turtles in Cape Cod Bay, Massachusetts
Source: PeerJ. 2023 Aug 30;11:e15866. doi: 10.7717/peerj.15866 (PMC10474834; doi:10.7717/peerj.15866)
Supplement: Supplemental Information 8 [file peerj-11-15866-s008.xlsx]

## Sheet: Sheet1
ESN	SeqNo	ESN	Unit Name	Message Time GMT	Message Subtype	Battery Condition	GPS Data	Missed Alarm	GPS Fail Counter	Longitude	Latitude	Message Trigger	Message Trigger State	Inputs 1-2	Alarms 1-2	Moving	GPS Fix Confidence	Message Time GMT
0-1367074		1367074	A-Felicia	2019-11-14 14:13:00	Turned On	Good	Valid	N/A	0	-70.1534	41.7523	N/A		11	0	N	High	2019-11-14 14:13:00
0-1367074		1367074	A-Felicia	2019-11-14 15:15:00	Location	Good	Valid	N/A	0	-70.1556	41.8622	N/A		11	0	N	High	2019-11-14 15:15:00
0-1367074		1367074	A-Felicia	2019-11-14 16:12:00	Location	Good	Valid	N/A	0	-70.132	41.8969	N/A		11	0	N	High	2019-11-14 16:12:00
0-1367074		1367074	A-Felicia	2019-11-14 17:12:00	Location	Good	Valid	N/A	0	-70.133	41.8971	N/A		11	0	N	High	2019-11-14 17:12:00
0-1367074		1367074	A-Felicia	2019-11-14 18:10:00	Location	Good	Valid	N/A	0	-70.1365	41.9002	N/A		11	0	N	High	2019-11-14 18:10:00
0-1367074		1367074	A-Felicia	2019-11-14 22:24:00	Location	Good	Valid	N/A	2	-70.1533	41.9241	N/A		11	0	N	High	2019-11-14 22:24:00
0-1367074		1367074	A-Felicia	2019-11-15 00:27:00	Location	Good	Valid	N/A	0	-70.1552	41.9274	N/A		11	0	N	Low	2019-11-15 00:27:00
0-1367074		1367074	A-Felicia	2019-11-15 01:20:00	Location	Good	Valid	N/A	0	-70.1539	41.9262	N/A		11	0	N	Low	2019-11-15 01:20:00
0-1367074		1367074	A-Felicia	2019-11-15 02:15:00	Location	Good	Valid	N/A	0	-70.1509	41.9252	N/A		11	0	N	Low	2019-11-15 02:15:00
0-1367074		1367074	A-Felicia	2019-11-15 03:24:00	Location	Good	Valid	N/A	0	-70.1472	41.9227	N/A		11	0	N	High	2019-11-15 03:24:00
0-1367074		1367074	A-Felicia	2019-11-15 05:05:00	Location	Good	Valid	N/A	0	-70.1414	41.9192	N/A		11	0	N	High	2019-11-15 05:05:00
0-1367074		1367074	A-Felicia	2019-11-15 20:58:00	Location	Good	Valid	N/A	3	-70.0989	41.9677	N/A		11	0	N	Low	2019-11-15 20:58:00
0-1367074		1367074	A-Felicia	2019-11-17 01:46:00	Location	Good	Valid	N/A	3	-70.1519	41.7579	N/A		11	0	N	High	2019-11-17 01:46:00
0-1367074		1367074	A-Felicia	2019-11-17 02:45:00	Location	Good	Valid	N/A	0	-70.1519	41.7578	N/A		11	0	N	High	2019-11-17 02:45:00
0-1367074		1367074	A-Felicia	2019-11-17 04:48:00	Location	Good	Valid	N/A	0	-70.152	41.7571	N/A		11	0	N	High	2019-11-17 04:48:00
0-1367074		1367074	A-Felicia	2019-11-17 05:37:00	Location	Good	Valid	N/A	0	-70.1523	41.7567	N/A		11	0	N	High	2019-11-17 05:37:00
0-1367074		1367074	A-Felicia	2019-11-17 06:43:00	Location	Good	Valid	N/A	0	-70.1523	41.7567	N/A		11	0	N	High	2019-11-17 06:43:00
0-1367074		1367074	A-Felicia	2019-11-17 07:55:00	Location	Good	Valid	N/A	0	-70.1523	41.7565	N/A		11	0	N	High	2019-11-17 07:55:00
0-1367074		1367074	A-Felicia	2019-11-17 09:05:00	Location	Good	Valid	N/A	0	-69.9723	41.795	N/A		11	0	N	High	2019-11-17 09:05:00
0-1367074		1367074	A-Felicia	2019-11-17 09:40:00	Location	Good	Valid	N/A	0	-69.9722	41.795	N/A		11	0	N	High	2019-11-17 09:40:00
0-1367074		1367074	A-Felicia	2019-11-17 10:56:00	Location	Good	Valid	N/A	0	-69.9723	41.795	N/A		11	0	N	High	2019-11-17 10:56:00
0-1367074		1367074	A-Felicia	2019-11-17 11:51:00	Location	Good	Valid	N/A	0	-69.9722	41.7951	N/A		11	0	N	High	2019-11-17 11:51:00
0-1367074		1367074	A-Felicia	2019-11-17 12:46:00	Location	Good	Valid	N/A	0	-69.9723	41.795	N/A		11	0	N	High	2019-11-17 12:46:00
0-1367074		1367074	A-Felicia	2019-11-17 13:44:00	Location	Good	Valid	N/A	0	-69.9724	41.795	N/A		11	0	N	High	2019-11-17 13:44:00
0-1367074		1367074	A-Felicia	2019-11-17 14:52:00	Location	Good	Valid	N/A	0	-69.9723	41.7951	N/A		11	0	N	High	2019-11-17 14:52:00
0-1367074		1367074	A-Felicia	2019-11-17 15:50:00	Location	Good	Valid	N/A	0	-69.9863	41.7856	N/A		11	0	N	High	2019-11-17 15:50:00
