# Supplementary material for: Developing bottom drifters to better understand the stranding locations of cold-stunned sea turtles in Cape Cod Bay, Massachusetts
Source: PeerJ. 2023 Aug 30;11:e15866. doi: 10.7717/peerj.15866 (PMC10474834; doi:10.7717/peerj.15866)
Supplement: Supplemental Information 9 [file peerj-11-15866-s009.xlsx]

## Sheet: Sheet1
ESN	SeqNo	ESN	Unit Name	Message Time GMT	Message Subtype	Battery Condition	GPS Data	Missed Alarm	GPS Fail Counter	Longitude	Latitude	Message Trigger	Message Trigger State	Inputs 1-2	Alarms 1-2	Moving	GPS Fix Confidence	Message Time GMT
0-1366978		1366978	EP	2019-11-19 15:26:00	Turned On	Good	Valid	N/A	0	-70.1344	41.8969	N/A		11	0	N	High	2019-11-19 15:26:00
0-1366978		1366978	EP	2019-11-19 16:36:00	Location	Good	Valid	N/A	0	-70.1157	41.9063	N/A		11	0	N	High	2019-11-19 16:36:00
0-1366978		1366978	EP	2019-11-19 17:32:00	Location	Good	Valid	N/A	0	-70.1027	41.9056	N/A		11	0	N	High	2019-11-19 17:32:00
0-1366978		1366978	EP	2019-11-19 18:22:00	Location	Good	Valid	N/A	0	-70.0881	41.8997	N/A		11	0	N	High	2019-11-19 18:22:00
0-1366978		1366978	EP	2019-11-19 19:29:00	Location	Good	Valid	N/A	0	-70.0689	41.8858	N/A		11	0	N	High	2019-11-19 19:29:00
0-1366978		1366978	EP	2019-11-19 20:20:00	Location	Good	Valid	N/A	0	-70.0689	41.8858	N/A		11	0	N	High	2019-11-19 20:20:00
0-1366978		1366978	EP	2019-11-19 21:27:00	Location	Good	Valid	N/A	0	-70.0688	41.8858	N/A		11	0	N	High	2019-11-19 21:27:00
0-1366978		1366978	EP	2019-11-19 22:19:00	Location	Good	Valid	N/A	0	-70.0688	41.8858	N/A		11	0	N	High	2019-11-19 22:19:00
0-1366978		1366978	EP	2019-11-19 23:22:00	Location	Good	Valid	N/A	0	-70.0688	41.8858	N/A		11	0	N	High	2019-11-19 23:22:00
