# Supplementary material for: Developing bottom drifters to better understand the stranding locations of cold-stunned sea turtles in Cape Cod Bay, Massachusetts
Source: PeerJ. 2023 Aug 30;11:e15866. doi: 10.7717/peerj.15866 (PMC10474834; doi:10.7717/peerj.15866)
Supplement: Supplemental Information 14 [file peerj-11-15866-s014.xlsx]

## Sheet: Sheet1
ESN	SeqNo	ESN	Unit Name	Message Time GMT	Message Subtype	Battery Condition	GPS Data	Missed Alarm	GPS Fail Counter	Longitude	Latitude	Message Trigger	Message Trigger State	Inputs 1-2	Alarms 1-2	Moving	GPS Fix Confidence	Message Time GMT
0-1350769		1350769	A-Felicia	2019-11-19 11:26:00	Turned On	Good	Valid	N/A	0	-71.5149	41.4651	N/A		11	0	N	High	2019-11-19 11:26:00
0-1350769		1350769	A-Felicia	2019-11-19 12:33:00	Location	Good	Valid	N/A	0	-70.9342	41.6534	N/A		11	0	N	High	2019-11-19 12:33:00
0-1350769		1350769	A-Felicia	2019-11-19 13:20:00	Location	Good	Valid	N/A	0	-70.1911	41.6914	N/A		11	0	N	High	2019-11-19 13:20:00
0-1350769		1350769	A-Felicia	2019-11-19 14:27:00	Location	Good	Valid	N/A	0	-70.1575	41.7656	N/A		11	0	N	High	2019-11-19 14:27:00
0-1350769		1350769	A-Felicia	2019-11-19 15:31:00	Location	Good	Valid	N/A	0	-70.1336	41.8971	N/A		11	0	N	High	2019-11-19 15:31:00
0-1350769		1350769	A-Felicia	2019-11-19 16:17:00	Location	Good	Valid	N/A	0	-70.1297	41.8961	N/A		11	0	N	High	2019-11-19 16:17:00
0-1350769		1350769	A-Felicia	2019-11-19 17:22:00	Location	Good	Valid	N/A	0	-70.1246	41.8932	N/A		11	0	N	High	2019-11-19 17:22:00
0-1350769		1350769	A-Felicia	2019-11-19 18:34:00	Location	Good	Valid	N/A	0	-70.119	41.8889	N/A		11	0	N	High	2019-11-19 18:34:00
0-1350769		1350769	A-Felicia	2019-11-19 19:28:00	Location	Good	Valid	N/A	0	-70.1149	41.8853	N/A		11	0	N	High	2019-11-19 19:28:00
0-1350769		1350769	A-Felicia	2019-11-19 20:19:00	Location	Good	Valid	N/A	0	-70.1122	41.8833	N/A		11	0	N	High	2019-11-19 20:19:00
0-1350769		1350769	A-Felicia	2019-11-19 21:36:00	Location	Good	Valid	N/A	0	-70.1138	41.8863	N/A		11	0	N	High	2019-11-19 21:36:00
0-1350769		1350769	A-Felicia	2019-11-19 22:18:00	Location	Good	Valid	N/A	0	-70.1158	41.8903	N/A		11	0	N	High	2019-11-19 22:18:00
0-1350769		1350769	A-Felicia	2019-11-19 23:28:00	Location	Good	Valid	N/A	0	-70.1179	41.8979	N/A		11	0	N	High	2019-11-19 23:28:00
0-1350769		1350769	A-Felicia	2019-11-20 00:20:00	Location	Good	Valid	N/A	0	-70.119	41.9036	N/A		11	0	N	High	2019-11-20 00:20:00
0-1350769		1350769	A-Felicia	2019-11-20 01:29:00	Location	Good	Valid	N/A	0	-70.1214	41.9114	N/A		11	0	N	High	2019-11-20 01:29:00
0-1350769		1350769	A-Felicia	2019-11-20 02:31:00	Location	Good	Valid	N/A	0	-70.1226	41.917	N/A		11	0	N	High	2019-11-20 02:31:00
0-1350769		1350769	A-Felicia	2019-11-20 03:35:00	Location	Good	Valid	N/A	0	-70.1224	41.9188	N/A		11	0	N	High	2019-11-20 03:35:00
0-1350769		1350769	A-Felicia	2019-11-20 04:37:00	Location	Good	Valid	N/A	0	-70.1208	41.9178	N/A		11	0	N	High	2019-11-20 04:37:00
0-1350769		1350769	A-Felicia	2019-11-20 05:23:00	Location	Good	Valid	N/A	0	-70.1183	41.915	N/A		11	0	N	High	2019-11-20 05:23:00
0-1350769		1350769	A-Felicia	2019-11-20 06:29:00	Location	Good	Valid	N/A	0	-70.115	41.9105	N/A		11	0	N	High	2019-11-20 06:29:00
0-1350769		1350769	A-Felicia	2019-11-20 07:41:00	Location	Good	Valid	N/A	0	-70.1115	41.9047	N/A		11	0	N	High	2019-11-20 07:41:00
0-1350769		1350769	A-Felicia	2019-11-20 08:35:00	Location	Good	Valid	N/A	0	-70.1085	41.899	N/A		11	0	N	High	2019-11-20 08:35:00
0-1350769		1350769	A-Felicia	2019-11-20 09:21:00	Location	Good	Valid	N/A	0	-70.1087	41.8965	N/A		11	0	N	High	2019-11-20 09:21:00
0-1350769		1350769	A-Felicia	2019-11-20 10:36:00	Location	Good	Valid	N/A	0	-70.1124	41.8972	N/A		11	0	N	High	2019-11-20 10:36:00
0-1350769		1350769	A-Felicia	2019-11-20 11:34:00	Location	Good	Valid	N/A	0	-70.1162	41.9	N/A		11	0	N	High	2019-11-20 11:34:00
0-1350769		1350769	A-Felicia	2019-11-20 12:32:00	Location	Good	Valid	N/A	0	-70.1201	41.9034	N/A		11	0	N	High	2019-11-20 12:32:00
0-1350769		1350769	A-Felicia	2019-11-20 13:37:00	Location	Good	Valid	N/A	0	-70.124	41.9073	N/A		11	0	N	High	2019-11-20 13:37:00
0-1350769		1350769	A-Felicia	2019-11-20 14:28:00	Location	Good	Valid	N/A	0	-70.126	41.9094	N/A		11	0	N	High	2019-11-20 14:28:00
0-1350769		1350769	A-Felicia	2019-11-20 15:20:00	Location	Good	Valid	N/A	0	-70.1282	41.9105	N/A		11	0	N	High	2019-11-20 15:20:00
0-1350769		1350769	A-Felicia	2019-11-20 16:18:00	Location	Good	Valid	N/A	0	-70.1284	41.9082	N/A		11	0	N	High	2019-11-20 16:18:00
0-1350769		1350769	A-Felicia	2019-11-20 17:20:00	Location	Good	Valid	N/A	0	-70.1271	41.9022	N/A		11	0	N	High	2019-11-20 17:20:00
0-1350769		1350769	A-Felicia	2019-11-20 18:35:00	Location	Good	Valid	N/A	0	-70.1251	41.8926	N/A		11	0	N	High	2019-11-20 18:35:00
0-1350769		1350769	A-Felicia	2019-11-20 19:32:00	Location	Good	Valid	N/A	0	-70.1235	41.8846	N/A		11	0	N	High	2019-11-20 19:32:00
0-1350769		1350769	A-Felicia	2019-11-20 20:25:00	Location	Good	Valid	N/A	0	-70.1219	41.8771	N/A		11	0	N	High	2019-11-20 20:25:00
0-1350769		1350769	A-Felicia	2019-11-20 21:28:00	Location	Good	Valid	N/A	0	-70.1189	41.868	N/A		11	0	N	High	2019-11-20 21:28:00
0-1350769		1350769	A-Felicia	2019-11-20 22:19:00	Location	Good	Valid	N/A	0	-70.1214	41.8645	N/A		11	0	N	High	2019-11-20 22:19:00
0-1350769		1350769	A-Felicia	2019-11-20 23:36:00	Location	Good	Valid	N/A	0	-70.1328	41.8656	N/A		11	0	N	High	2019-11-20 23:36:00
0-1350769		1350769	A-Felicia	2019-11-21 00:22:00	Location	Good	Valid	N/A	0	-70.1393	41.8666	N/A		11	0	N	High	2019-11-21 00:22:00
0-1350769		1350769	A-Felicia	2019-11-21 01:26:00	Location	Good	Valid	N/A	0	-70.1465	41.8683	N/A		11	0	N	High	2019-11-21 01:26:00
0-1350769		1350769	A-Felicia	2019-11-21 02:33:00	Location	Good	Valid	N/A	0	-70.1535	41.8701	N/A		11	0	N	High	2019-11-21 02:33:00
0-1350769		1350769	A-Felicia	2019-11-21 03:23:00	Location	Good	Valid	N/A	0	-70.1578	41.8709	N/A		11	0	N	High	2019-11-21 03:23:00
0-1350769		1350769	A-Felicia	2019-11-21 04:38:00	Location	Good	Valid	N/A	0	-70.1609	41.8677	N/A		11	0	N	High	2019-11-21 04:38:00
0-1350769		1350769	A-Felicia	2019-11-21 05:34:00	Location	Good	Valid	N/A	0	-70.1613	41.8607	N/A		11	0	N	High	2019-11-21 05:34:00
0-1350769		1350769	A-Felicia	2019-11-21 06:32:00	Location	Good	Valid	N/A	0	-70.1611	41.8521	N/A		11	0	N	High	2019-11-21 06:32:00
0-1350769		1350769	A-Felicia	2019-11-21 07:33:00	Location	Good	Valid	N/A	0	-70.1592	41.8393	N/A		11	0	N	High	2019-11-21 07:33:00
0-1350769		1350769	A-Felicia	2019-11-21 08:30:00	Location	Good	Valid	N/A	0	-70.1531	41.8282	N/A		11	0	N	High	2019-11-21 08:30:00
0-1350769		1350769	A-Felicia	2019-11-21 09:24:00	Location	Good	Valid	N/A	0	-70.1501	41.8219	N/A		11	0	N	High	2019-11-21 09:24:00
0-1350769		1350769	A-Felicia	2019-11-21 10:35:00	Location	Good	Valid	N/A	0	-70.1442	41.8169	N/A		11	0	N	High	2019-11-21 10:35:00
0-1350769		1350769	A-Felicia	2019-11-21 11:29:00	Location	Good	Valid	N/A	0	-70.1424	41.8156	N/A		11	0	N	High	2019-11-21 11:29:00
0-1350769		1350769	A-Felicia	2019-11-21 12:29:00	Location	Good	Valid	N/A	0	-70.1446	41.815	N/A		11	0	N	High	2019-11-21 12:29:00
0-1350769		1350769	A-Felicia	2019-11-21 13:21:00	Location	Good	Valid	N/A	0	-70.1494	41.8144	N/A		11	0	N	High	2019-11-21 13:21:00
0-1350769		1350769	A-Felicia	2019-11-21 14:31:00	Location	Good	Valid	N/A	0	-70.1592	41.8133	N/A		11	0	N	High	2019-11-21 14:31:00
0-1350769		1350769	A-Felicia	2019-11-21 15:27:00	Location	Good	Valid	N/A	0	-70.1706	41.8121	N/A		11	0	N	High	2019-11-21 15:27:00
0-1350769		1350769	A-Felicia	2019-11-21 16:38:00	Location	Good	Valid	N/A	0	-70.1811	41.8106	N/A		11	0	N	High	2019-11-21 16:38:00
0-1350769		1350769	A-Felicia	2019-11-21 17:35:00	Location	Good	Valid	N/A	0	-70.1844	41.8073	N/A		11	0	N	High	2019-11-21 17:35:00
0-1350769		1350769	A-Felicia	2019-11-21 18:18:00	Location	Good	Valid	N/A	0	-70.1839	41.8041	N/A		11	0	N	High	2019-11-21 18:18:00
0-1350769		1350769	A-Felicia	2019-11-21 19:24:00	Location	Good	Valid	N/A	0	-70.1793	41.7995	N/A		11	0	N	High	2019-11-21 19:24:00
0-1350769		1350769	A-Felicia	2019-11-21 20:26:00	Location	Good	Valid	N/A	0	-70.172	41.7959	N/A		11	0	N	High	2019-11-21 20:26:00
0-1350769		1350769	A-Felicia	2019-11-21 21:38:00	Location	Good	Valid	N/A	0	-70.1618	41.7922	N/A		11	0	N	High	2019-11-21 21:38:00
0-1350769		1350769	A-Felicia	2019-11-21 22:22:00	Location	Good	Valid	N/A	0	-70.1553	41.7908	N/A		11	0	N	High	2019-11-21 22:22:00
0-1350769		1350769	A-Felicia	2019-11-21 23:21:00	Location	Good	Valid	N/A	0	-70.1491	41.7903	N/A		11	0	N	High	2019-11-21 23:21:00
0-1350769		1350769	A-Felicia	2019-11-22 00:34:00	Location	Good	Valid	N/A	0	-70.1471	41.7919	N/A		11	0	N	High	2019-11-22 00:34:00
0-1350769		1350769	A-Felicia	2019-11-22 01:33:00	Location	Good	Valid	N/A	0	-70.1496	41.7938	N/A		11	0	N	High	2019-11-22 01:33:00
0-1350769		1350769	A-Felicia	2019-11-22 02:20:00	Location	Good	Valid	N/A	0	-70.1541	41.7954	N/A		11	0	N	High	2019-11-22 02:20:00
0-1350769		1350769	A-Felicia	2019-11-22 03:26:00	Location	Good	Valid	N/A	0	-70.1643	41.7981	N/A		11	0	N	High	2019-11-22 03:26:00
0-1350769		1350769	A-Felicia	2019-11-22 04:26:00	Location	Good	Valid	N/A	0	-70.1747	41.8006	N/A		11	0	N	High	2019-11-22 04:26:00
0-1350769		1350769	A-Felicia	2019-11-22 05:36:00	Location	Good	Valid	N/A	0	-70.1844	41.8022	N/A		11	0	N	High	2019-11-22 05:36:00
0-1350769		1350769	A-Felicia	2019-11-22 06:32:00	Location	Good	Valid	N/A	0	-70.1862	41.8026	N/A		11	0	N	High	2019-11-22 06:32:00
0-1350769		1350769	A-Felicia	2019-11-22 07:31:00	Location	Good	Valid	N/A	0	-70.1833	41.8019	N/A		11	0	N	High	2019-11-22 07:31:00
0-1350769		1350769	A-Felicia	2019-11-22 08:35:00	Location	Good	Valid	N/A	0	-70.1764	41.8013	N/A		11	0	N	High	2019-11-22 08:35:00
0-1350769		1350769	A-Felicia	2019-11-22 09:31:00	Location	Good	Valid	N/A	0	-70.1685	41.8011	N/A		11	0	N	High	2019-11-22 09:31:00
0-1350769		1350769	A-Felicia	2019-11-22 10:27:00	Location	Good	Valid	N/A	0	-70.1583	41.8011	N/A		11	0	N	High	2019-11-22 10:27:00
0-1350769		1350769	A-Felicia	2019-11-22 11:38:00	Location	Good	Valid	N/A	0	-70.1478	41.8022	N/A		11	0	N	High	2019-11-22 11:38:00
0-1350769		1350769	A-Felicia	2019-11-22 12:37:00	Location	Good	Valid	N/A	0	-70.1416	41.8048	N/A		11	0	N	High	2019-11-22 12:37:00
0-1350769		1350769	A-Felicia	2019-11-22 13:26:00	Location	Good	Valid	N/A	0	-70.1398	41.8077	N/A		11	0	N	High	2019-11-22 13:26:00
0-1350769		1350769	A-Felicia	2019-11-22 14:26:00	Location	Good	Valid	N/A	0	-70.1417	41.8116	N/A		11	0	N	High	2019-11-22 14:26:00
0-1350769		1350769	A-Felicia	2019-11-22 15:21:00	Location	Good	Valid	N/A	0	-70.1469	41.8154	N/A		11	0	N	High	2019-11-22 15:21:00
0-1350769		1350769	A-Felicia	2019-11-22 16:37:00	Location	Good	Valid	N/A	0	-70.1594	41.8197	N/A		11	0	N	High	2019-11-22 16:37:00
0-1350769		1350769	A-Felicia	2019-11-22 17:34:00	Location	Good	Valid	N/A	0	-70.1743	41.8258	N/A		11	0	N	High	2019-11-22 17:34:00
0-1350769		1350769	A-Felicia	2019-11-22 18:30:00	Location	Good	Valid	N/A	0	-70.1752	41.8289	N/A		11	0	N	High	2019-11-22 18:30:00
0-1350769		1350769	A-Felicia	2019-11-22 19:30:00	Location	Good	Valid	N/A	0	-70.1671	41.8273	N/A		11	0	N	High	2019-11-22 19:30:00
0-1350769		1350769	A-Felicia	2019-11-22 20:24:00	Location	Good	Valid	N/A	0	-70.1568	41.824	N/A		11	0	N	High	2019-11-22 20:24:00
0-1350769		1350769	A-Felicia	2019-11-22 21:23:00	Location	Good	Valid	N/A	0	-70.1455	41.8231	N/A		11	0	N	High	2019-11-22 21:23:00
0-1350769		1350769	A-Felicia	2019-11-22 22:37:00	Location	Good	Valid	N/A	0	-70.1325	41.8226	N/A		11	0	N	High	2019-11-22 22:37:00
0-1350769		1350769	A-Felicia	2019-11-22 23:35:00	Location	Good	Valid	N/A	0	-70.1218	41.822	N/A		11	0	N	High	2019-11-22 23:35:00
0-1350769		1350769	A-Felicia	2019-11-23 00:38:00	Location	Good	Valid	N/A	0	-70.1151	41.8227	N/A		11	0	N	High	2019-11-23 00:38:00
0-1350769		1350769	A-Felicia	2019-11-23 01:36:00	Location	Good	Valid	N/A	0	-70.1184	41.8244	N/A		11	0	N	High	2019-11-23 01:36:00
0-1350769		1350769	A-Felicia	2019-11-23 02:33:00	Location	Good	Valid	N/A	0	-70.1253	41.8256	N/A		11	0	N	High	2019-11-23 02:33:00
0-1350769		1350769	A-Felicia	2019-11-23 03:28:00	Location	Good	Valid	N/A	0	-70.133	41.8261	N/A		11	0	N	High	2019-11-23 03:28:00
0-1350769		1350769	A-Felicia	2019-11-23 04:25:00	Location	Good	Valid	N/A	0	-70.1459	41.8251	N/A		11	0	N	High	2019-11-23 04:25:00
0-1350769		1350769	A-Felicia	2019-11-23 05:39:00	Location	Good	Valid	N/A	0	-70.1691	41.821	N/A		11	0	N	High	2019-11-23 05:39:00
0-1350769		1350769	A-Felicia	2019-11-23 06:22:00	Location	Good	Valid	N/A	0	-70.1787	41.8209	N/A		11	0	N	High	2019-11-23 06:22:00
0-1350769		1350769	A-Felicia	2019-11-23 07:39:00	Location	Good	Valid	N/A	0	-70.176	41.815	N/A		11	0	N	High	2019-11-23 07:39:00
0-1350769		1350769	A-Felicia	2019-11-23 08:39:00	Location	Good	Valid	N/A	0	-70.1629	41.8113	N/A		11	0	N	High	2019-11-23 08:39:00
0-1350769		1350769	A-Felicia	2019-11-23 09:32:00	Location	Good	Valid	N/A	0	-70.152	41.8108	N/A		11	0	N	High	2019-11-23 09:32:00
0-1350769		1350769	A-Felicia	2019-11-23 10:35:00	Location	Good	Valid	N/A	0	-70.1336	41.8112	N/A		11	0	N	High	2019-11-23 10:35:00
0-1350769		1350769	A-Felicia	2019-11-23 11:24:00	Location	Good	Valid	N/A	0	-70.12	41.8121	N/A		11	0	N	High	2019-11-23 11:24:00
0-1350769		1350769	A-Felicia	2019-11-23 12:26:00	Location	Good	Valid	N/A	0	-70.1079	41.8144	N/A		11	0	N	High	2019-11-23 12:26:00
0-1350769		1350769	A-Felicia	2019-11-23 13:34:00	Location	Good	Valid	N/A	0	-70.1035	41.8171	N/A		11	0	N	High	2019-11-23 13:34:00
0-1350769		1350769	A-Felicia	2019-11-23 14:37:00	Location	Good	Valid	N/A	0	-70.1057	41.8192	N/A		11	0	N	High	2019-11-23 14:37:00
0-1350769		1350769	A-Felicia	2019-11-23 15:30:00	Location	Good	Valid	N/A	0	-70.1132	41.8212	N/A		11	0	N	High	2019-11-23 15:30:00
0-1350769		1350769	A-Felicia	2019-11-23 16:20:00	Location	Good	Valid	N/A	0	-70.1224	41.823	N/A		11	0	N	High	2019-11-23 16:20:00
0-1350769		1350769	A-Felicia	2019-11-23 17:32:00	Location	Good	Valid	N/A	0	-70.1403	41.8248	N/A		11	0	N	High	2019-11-23 17:32:00
0-1350769		1350769	A-Felicia	2019-11-23 18:34:00	Location	Good	Valid	N/A	0	-70.1555	41.8244	N/A		11	0	N	High	2019-11-23 18:34:00
0-1350769		1350769	A-Felicia	2019-11-23 19:23:00	Location	Good	Valid	N/A	0	-70.1617	41.8222	N/A		11	0	N	High	2019-11-23 19:23:00
0-1350769		1350769	A-Felicia	2019-11-23 20:22:00	Location	Good	Valid	N/A	0	-70.1581	41.819	N/A		11	0	N	High	2019-11-23 20:22:00
0-1350769		1350769	A-Felicia	2019-11-23 21:32:00	Location	Good	Valid	N/A	0	-70.1455	41.8176	N/A		11	0	N	High	2019-11-23 21:32:00
0-1350769		1350769	A-Felicia	2019-11-23 22:26:00	Location	Good	Valid	N/A	0	-70.1324	41.8177	N/A		11	0	N	High	2019-11-23 22:26:00
0-1350769		1350769	A-Felicia	2019-11-23 23:36:00	Location	Good	Valid	N/A	0	-70.112	41.8202	N/A		11	0	N	High	2019-11-23 23:36:00
0-1350769		1350769	A-Felicia	2019-11-24 00:24:00	Location	Good	Valid	N/A	0	-70.0996	41.8226	N/A		11	0	N	High	2019-11-24 00:24:00
0-1350769		1350769	A-Felicia	2019-11-24 01:23:00	Location	Good	Valid	N/A	0	-70.0918	41.8264	N/A		11	0	N	High	2019-11-24 01:23:00
0-1350769		1350769	A-Felicia	2019-11-24 02:28:00	Location	Good	Valid	N/A	0	-70.0923	41.8309	N/A		11	0	N	High	2019-11-24 02:28:00
0-1350769		1350769	A-Felicia	2019-11-24 03:38:00	Location	Good	Valid	N/A	0	-70.1005	41.8355	N/A		11	0	N	High	2019-11-24 03:38:00
0-1350769		1350769	A-Felicia	2019-11-24 04:25:00	Location	Good	Valid	N/A	0	-70.1076	41.8375	N/A		11	0	N	High	2019-11-24 04:25:00
0-1350769		1350769	A-Felicia	2019-11-24 05:30:00	Location	Good	Valid	N/A	0	-70.1197	41.8392	N/A		11	0	N	High	2019-11-24 05:30:00
0-1350769		1350769	A-Felicia	2019-11-24 06:35:00	Location	Good	Valid	N/A	0	-70.1347	41.841	N/A		11	0	N	High	2019-11-24 06:35:00
0-1350769		1350769	A-Felicia	2019-11-24 07:37:00	Location	Good	Valid	N/A	0	-70.1391	41.8396	N/A		11	0	N	High	2019-11-24 07:37:00
0-1350769		1350769	A-Felicia	2019-11-24 08:25:00	Location	Good	Valid	N/A	0	-70.1332	41.8347	N/A		11	0	N	High	2019-11-24 08:25:00
0-1350769		1350769	A-Felicia	2019-11-24 09:23:00	Location	Good	Valid	N/A	0	-70.1234	41.835	N/A		11	0	N	High	2019-11-24 09:23:00
0-1350769		1350769	A-Felicia	2019-11-24 10:30:00	Location	Good	Valid	N/A	0	-70.1114	41.8372	N/A		11	0	N	High	2019-11-24 10:30:00
0-1350769		1350769	A-Felicia	2019-11-24 11:35:00	Location	Good	Valid	N/A	0	-70.0996	41.8383	N/A		11	0	N	High	2019-11-24 11:35:00
0-1350769		1350769	A-Felicia	2019-11-24 12:23:00	Location	Good	Valid	N/A	0	-70.0902	41.8394	N/A		11	0	N	High	2019-11-24 12:23:00
0-1350769		1350769	A-Felicia	2019-11-24 13:32:00	Location	Good	Valid	N/A	0	-70.0826	41.8421	N/A		11	0	N	High	2019-11-24 13:32:00
0-1350769		1350769	A-Felicia	2019-11-24 14:37:00	Location	Good	Valid	N/A	0	-70.0849	41.8463	N/A		11	0	N	High	2019-11-24 14:37:00
0-1350769		1350769	A-Felicia	2019-11-24 15:27:00	Location	Good	Valid	N/A	0	-70.094	41.8498	N/A		11	0	N	High	2019-11-24 15:27:00
0-1350769		1350769	A-Felicia	2019-11-24 16:21:00	Location	Good	Valid	N/A	0	-70.1052	41.8575	N/A		11	0	N	High	2019-11-24 16:21:00
0-1350769		1350769	A-Felicia	2019-11-24 17:32:00	Location	Good	Valid	N/A	0	-70.1184	41.8693	N/A		11	0	N	High	2019-11-24 17:32:00
0-1350769		1350769	A-Felicia	2019-11-24 18:29:00	Location	Good	Valid	N/A	0	-70.1267	41.877	N/A		11	0	N	High	2019-11-24 18:29:00
0-1350769		1350769	A-Felicia	2019-11-24 19:39:00	Location	Good	Valid	N/A	0	-70.1291	41.8827	N/A		11	0	N	High	2019-11-24 19:39:00
0-1350769		1350769	A-Felicia	2019-11-24 20:28:00	Location	Good	Valid	N/A	0	-70.1266	41.884	N/A		11	0	N	High	2019-11-24 20:28:00
0-1350769		1350769	A-Felicia	2019-11-24 21:41:00	Location	Good	Valid	N/A	0	-70.1198	41.8817	N/A		11	0	N	High	2019-11-24 21:41:00
0-1350769		1350769	A-Felicia	2019-11-24 22:34:00	Location	Good	Valid	N/A	0	-70.1117	41.8784	N/A		11	0	N	High	2019-11-24 22:34:00
0-1350769		1350769	A-Felicia	2019-11-24 23:30:00	Location	Good	Valid	N/A	0	-70.0994	41.8719	N/A		11	0	N	High	2019-11-24 23:30:00
0-1350769		1350769	A-Felicia	2019-11-25 00:28:00	Location	Good	Valid	N/A	0	-70.0902	41.8658	N/A		11	0	N	High	2019-11-25 00:28:00
0-1350769		1350769	A-Felicia	2019-11-25 01:38:00	Location	Good	Valid	N/A	0	-70.0774	41.8603	N/A		11	0	N	High	2019-11-25 01:38:00
0-1350769		1350769	A-Felicia	2019-11-25 02:42:00	Location	Good	Valid	N/A	0	-70.0703	41.8562	N/A		11	0	N	High	2019-11-25 02:42:00
0-1350769		1350769	A-Felicia	2019-11-25 03:41:00	Location	Good	Valid	N/A	0	-70.074	41.851	N/A		11	0	N	High	2019-11-25 03:41:00
0-1350769		1350769	A-Felicia	2019-11-25 04:35:00	Location	Good	Valid	N/A	0	-70.0831	41.8461	N/A		11	0	N	High	2019-11-25 04:35:00
0-1350769		1350769	A-Felicia	2019-11-25 05:31:00	Location	Good	Valid	N/A	0	-70.092	41.8424	N/A		11	0	N	High	2019-11-25 05:31:00
0-1350769		1350769	A-Felicia	2019-11-25 06:34:00	Location	Good	Valid	N/A	0	-70.1119	41.8396	N/A		11	0	N	High	2019-11-25 06:34:00
0-1350769		1350769	A-Felicia	2019-11-25 07:37:00	Location	Good	Valid	N/A	0	-70.1233	41.8354	N/A		11	0	N	High	2019-11-25 07:37:00
0-1350769		1350769	A-Felicia	2019-11-25 08:44:00	Location	Good	Valid	N/A	0	-70.1349	41.8284	N/A		11	0	N	High	2019-11-25 08:44:00
0-1350769		1350769	A-Felicia	2019-11-25 09:42:00	Location	Good	Valid	N/A	0	-70.132	41.8244	N/A		11	0	N	High	2019-11-25 09:42:00
0-1350769		1350769	A-Felicia	2019-11-25 10:27:00	Location	Good	Valid	N/A	0	-70.1225	41.8232	N/A		11	0	N	High	2019-11-25 10:27:00
0-1350769		1350769	A-Felicia	2019-11-25 11:39:00	Location	Good	Valid	N/A	0	-70.1029	41.8237	N/A		11	0	N	High	2019-11-25 11:39:00
0-1350769		1350769	A-Felicia	2019-11-25 12:33:00	Location	Good	Valid	N/A	0	-70.0886	41.8251	N/A		11	0	N	High	2019-11-25 12:33:00
0-1350769		1350769	A-Felicia	2019-11-25 13:24:00	Location	Good	Valid	N/A	0	-70.0777	41.8268	N/A		11	0	N	High	2019-11-25 13:24:00
0-1350769		1350769	A-Felicia	2019-11-25 14:23:00	Location	Good	Valid	N/A	0	-70.0688	41.8292	N/A		11	0	N	High	2019-11-25 14:23:00
0-1350769		1350769	A-Felicia	2019-11-25 15:26:00	Location	Good	Valid	N/A	0	-70.0672	41.832	N/A		11	0	N	High	2019-11-25 15:26:00
0-1350769		1350769	A-Felicia	2019-11-25 16:28:00	Location	Good	Valid	N/A	0	-70.0722	41.833	N/A		11	0	N	High	2019-11-25 16:28:00
0-1350769		1350769	A-Felicia	2019-11-25 17:39:00	Location	Good	Valid	N/A	0	-70.0858	41.8331	N/A		11	0	N	High	2019-11-25 17:39:00
0-1350769		1350769	A-Felicia	2019-11-25 18:41:00	Location	Good	Valid	N/A	0	-70.105	41.8356	N/A		11	0	N	High	2019-11-25 18:41:00
0-1350769		1350769	A-Felicia	2019-11-25 19:40:00	Location	Good	Valid	N/A	0	-70.125	41.8367	N/A		11	0	N	High	2019-11-25 19:40:00
0-1350769		1350769	A-Felicia	2019-11-25 20:36:00	Location	Good	Valid	N/A	0	-70.1383	41.8351	N/A		11	0	N	High	2019-11-25 20:36:00
0-1350769		1350769	A-Felicia	2019-11-25 21:23:00	Location	Good	Valid	N/A	0	-70.1411	41.832	N/A		11	0	N	High	2019-11-25 21:23:00
0-1350769		1350769	A-Felicia	2019-11-25 22:24:00	Location	Good	Valid	N/A	0	-70.1317	41.8319	N/A		11	0	N	High	2019-11-25 22:24:00
0-1350769		1350769	A-Felicia	2019-11-25 23:32:00	Location	Good	Valid	N/A	0	-70.1112	41.8345	N/A		11	0	N	High	2019-11-25 23:32:00
0-1350769		1350769	A-Felicia	2019-11-26 00:38:00	Location	Good	Valid	N/A	0	-70.0896	41.8376	N/A		11	0	N	High	2019-11-26 00:38:00
0-1350769		1350769	A-Felicia	2019-11-26 01:24:00	Location	Good	Valid	N/A	0	-70.0758	41.839	N/A		11	0	N	High	2019-11-26 01:24:00
0-1350769		1350769	A-Felicia	2019-11-26 02:33:00	Location	Good	Valid	N/A	0	-70.0607	41.8438	N/A		11	0	N	High	2019-11-26 02:33:00
0-1350769		1350769	A-Felicia	2019-11-26 03:36:00	Location	Good	Valid	N/A	0	-70.0572	41.8479	N/A		11	0	N	High	2019-11-26 03:36:00
0-1350769		1350769	A-Felicia	2019-11-26 04:28:00	Location	Good	Valid	N/A	0	-70.0596	41.8489	N/A		11	0	N	High	2019-11-26 04:28:00
0-1350769		1350769	A-Felicia	2019-11-26 05:39:00	Location	Good	Valid	N/A	0	-70.0699	41.8471	N/A		11	0	N	High	2019-11-26 05:39:00
0-1350769		1350769	A-Felicia	2019-11-26 06:31:00	Location	Good	Valid	N/A	0	-70.0827	41.8465	N/A		11	0	N	High	2019-11-26 06:31:00
0-1350769		1350769	A-Felicia	2019-11-26 07:24:00	Location	Good	Valid	N/A	0	-70.0965	41.8462	N/A		11	0	N	High	2019-11-26 07:24:00
0-1350769		1350769	A-Felicia	2019-11-26 08:52:00	Location	Good	Valid	N/A	0	-70.1117	41.8466	N/A		11	0	N	High	2019-11-26 08:52:00
0-1350769		1350769	A-Felicia	2019-11-26 09:38:00	Location	Good	Valid	N/A	0	-70.1122	41.8445	N/A		11	0	N	High	2019-11-26 09:38:00
0-1350769		1350769	A-Felicia	2019-11-26 10:30:00	Location	Good	Valid	N/A	0	-70.1019	41.8427	N/A		11	0	N	High	2019-11-26 10:30:00
0-1350769		1350769	A-Felicia	2019-11-26 11:27:00	Location	Good	Valid	N/A	0	-70.0809	41.8428	N/A		11	0	N	High	2019-11-26 11:27:00
0-1350769		1350769	A-Felicia	2019-11-26 12:29:00	Location	Good	Valid	N/A	0	-70.0629	41.8463	N/A		11	0	N	High	2019-11-26 12:29:00
0-1350769		1350769	A-Felicia	2019-11-26 13:38:00	Location	Good	Valid	N/A	0	-70.0492	41.8566	N/A		11	0	N	High	2019-11-26 13:38:00
0-1350769		1350769	A-Felicia	2019-11-26 14:32:00	Location	Good	Valid	N/A	0	-70.0449	41.8665	N/A		11	0	N	High	2019-11-26 14:32:00
0-1350769		1350769	A-Felicia	2019-11-26 15:31:00	Location	Good	Valid	N/A	0	-70.0464	41.8743	N/A		11	0	N	High	2019-11-26 15:31:00
0-1350769		1350769	A-Felicia	2019-11-26 16:43:00	Location	Good	Valid	N/A	0	-70.0532	41.876	N/A		11	0	N	High	2019-11-26 16:43:00
0-1350769		1350769	A-Felicia	2019-11-26 17:35:00	Location	Good	Valid	N/A	0	-70.0598	41.8725	N/A		11	0	N	High	2019-11-26 17:35:00
0-1350769		1350769	A-Felicia	2019-11-26 19:37:00	Location	Good	Valid	N/A	1	-70.0636	41.8692	N/A		11	0	N	High	2019-11-26 19:37:00
0-1350769		1350769	A-Felicia	2019-11-26 20:51:00	Location	Good	Valid	N/A	0	-70.0632	41.8693	N/A		11	0	N	High	2019-11-26 20:51:00
0-1350769		1350769	A-Felicia	2019-11-26 21:39:00	Location	Good	Valid	N/A	0	-70.0632	41.8693	N/A		11	0	N	High	2019-11-26 21:39:00
0-1350769		1350769	A-Felicia	2019-11-26 22:41:00	Location	Good	Valid	N/A	0	-70.0632	41.8693	N/A		11	0	N	High	2019-11-26 22:41:00
0-1350769		1350769	A-Felicia	2019-11-26 23:43:00	Location	Good	Valid	N/A	0	-70.0632	41.8693	N/A		11	0	N	High	2019-11-26 23:43:00
0-1350769		1350769	A-Felicia	2019-11-27 01:43:00	Location	Good	Valid	N/A	0	-70.062	41.8694	N/A		11	0	N	High	2019-11-27 01:43:00
0-1350769		1350769	A-Felicia	2019-11-27 02:28:00	Location	Good	Valid	N/A	0	-70.059	41.8696	N/A		11	0	N	High	2019-11-27 02:28:00
0-1350769		1350769	A-Felicia	2019-11-27 03:42:00	Location	Good	Valid	N/A	0	-70.0599	41.8704	N/A		11	0	N	High	2019-11-27 03:42:00
0-1350769		1350769	A-Felicia	2019-11-27 04:38:00	Location	Good	Valid	N/A	0	-70.0663	41.8693	N/A		11	0	N	High	2019-11-27 04:38:00
0-1350769		1350769	A-Felicia	2019-11-27 05:34:00	Location	Good	Valid	N/A	0	-70.0808	41.8706	N/A		11	0	N	High	2019-11-27 05:34:00
0-1350769		1350769	A-Felicia	2019-11-27 06:29:00	Location	Good	Valid	N/A	0	-70.0921	41.8787	N/A		11	0	N	High	2019-11-27 06:29:00
0-1350769		1350769	A-Felicia	2019-11-27 07:28:00	Location	Good	Valid	N/A	0	-70.099	41.8887	N/A		11	0	N	High	2019-11-27 07:28:00
0-1350769		1350769	A-Felicia	2019-11-27 08:36:00	Location	Good	Valid	N/A	0	-70.1068	41.8996	N/A		11	0	N	High	2019-11-27 08:36:00
0-1350769		1350769	A-Felicia	2019-11-27 09:31:00	Location	Good	Valid	N/A	0	-70.1093	41.9044	N/A		11	0	N	High	2019-11-27 09:31:00
0-1350769		1350769	A-Felicia	2019-11-27 10:36:00	Location	Good	Valid	N/A	0	-70.1098	41.9042	N/A		11	0	N	High	2019-11-27 10:36:00
0-1350769		1350769	A-Felicia	2019-11-27 11:42:00	Location	Good	Valid	N/A	0	-70.1065	41.8978	N/A		11	0	N	High	2019-11-27 11:42:00
0-1350769		1350769	A-Felicia	2019-11-27 12:38:00	Location	Good	Valid	N/A	0	-70.0992	41.8896	N/A		11	0	N	High	2019-11-27 12:38:00
0-1350769		1350769	A-Felicia	2019-11-27 13:34:00	Location	Good	Valid	N/A	0	-70.0922	41.8805	N/A		11	0	N	High	2019-11-27 13:34:00
0-1350769		1350769	A-Felicia	2019-11-27 14:36:00	Location	Good	Valid	N/A	0	-70.0854	41.8698	N/A		11	0	N	High	2019-11-27 14:36:00
0-1350769		1350769	A-Felicia	2019-11-27 15:37:00	Location	Good	Valid	N/A	0	-70.0802	41.8642	N/A		11	0	N	High	2019-11-27 15:37:00
0-1350769		1350769	A-Felicia	2019-11-27 16:43:00	Location	Good	Valid	N/A	0	-70.0882	41.8656	N/A		11	0	N	High	2019-11-27 16:43:00
0-1350769		1350769	A-Felicia	2019-11-27 17:36:00	Location	Good	Valid	N/A	0	-70.0994	41.8733	N/A		11	0	N	High	2019-11-27 17:36:00
0-1350769		1350769	A-Felicia	2019-11-27 18:25:00	Location	Good	Valid	N/A	0	-70.1094	41.883	N/A		11	0	N	High	2019-11-27 18:25:00
0-1350769		1350769	A-Felicia	2019-11-27 19:29:00	Location	Good	Valid	N/A	0	-70.1171	41.8936	N/A		11	0	N	High	2019-11-27 19:29:00
0-1350769		1350769	A-Felicia	2019-11-27 20:42:00	Location	Good	Valid	N/A	0	-70.1234	41.9048	N/A		11	0	N	High	2019-11-27 20:42:00
0-1350769		1350769	A-Felicia	2019-11-27 21:37:00	Location	Good	Valid	N/A	0	-70.1265	41.9114	N/A		11	0	N	High	2019-11-27 21:37:00
0-1350769		1350769	A-Felicia	2019-11-27 22:28:00	Location	Good	Valid	N/A	0	-70.1277	41.9157	N/A		11	0	N	High	2019-11-27 22:28:00
0-1350769		1350769	A-Felicia	2019-11-27 23:25:00	Location	Good	Valid	N/A	0	-70.1257	41.9176	N/A		11	0	N	High	2019-11-27 23:25:00
0-1350769		1350769	A-Felicia	2019-11-28 00:29:00	Location	Good	Valid	N/A	0	-70.1214	41.917	N/A		11	0	N	High	2019-11-28 00:29:00
0-1350769		1350769	A-Felicia	2019-11-28 01:36:00	Location	Good	Valid	N/A	0	-70.1144	41.9148	N/A		11	0	N	High	2019-11-28 01:36:00
0-1350769		1350769	A-Felicia	2019-11-28 02:27:00	Location	Good	Valid	N/A	0	-70.1093	41.9121	N/A		11	0	N	High	2019-11-28 02:27:00
0-1350769		1350769	A-Felicia	2019-11-28 03:43:00	Location	Good	Valid	N/A	0	-70.1026	41.9079	N/A		11	0	N	High	2019-11-28 03:43:00
0-1350769		1350769	A-Felicia	2019-11-28 04:25:00	Location	Good	Valid	N/A	0	-70.101	41.9081	N/A		11	0	N	High	2019-11-28 04:25:00
0-1350769		1350769	A-Felicia	2019-11-28 05:34:00	Location	Good	Valid	N/A	0	-70.1013	41.9142	N/A		11	0	N	High	2019-11-28 05:34:00
0-1350769		1350769	A-Felicia	2019-11-28 06:39:00	Location	Good	Valid	N/A	0	-70.1018	41.9232	N/A		11	0	N	High	2019-11-28 06:39:00
0-1350769		1350769	A-Felicia	2019-11-28 07:38:00	Location	Good	Valid	N/A	0	-70.1019	41.9313	N/A		11	0	N	High	2019-11-28 07:38:00
0-1350769		1350769	A-Felicia	2019-11-28 09:31:00	Location	Good	Valid	N/A	0	-70.1028	41.9435	N/A		11	0	N	High	2019-11-28 09:31:00
0-1350769		1350769	A-Felicia	2019-11-28 10:36:00	Location	Good	Valid	N/A	0	-70.1021	41.9459	N/A		11	0	N	High	2019-11-28 10:36:00
0-1350769		1350769	A-Felicia	2019-11-28 11:39:00	Location	Good	Valid	N/A	0	-70.0993	41.9451	N/A		11	0	N	High	2019-11-28 11:39:00
0-1350769		1350769	A-Felicia	2019-11-28 12:45:00	Location	Good	Valid	N/A	0	-70.0949	41.941	N/A		11	0	N	High	2019-11-28 12:45:00
0-1350769		1350769	A-Felicia	2019-11-28 13:43:00	Location	Good	Valid	N/A	0	-70.0912	41.9351	N/A		11	0	N	High	2019-11-28 13:43:00
0-1350769		1350769	A-Felicia	2019-11-28 14:37:00	Location	Good	Valid	N/A	0	-70.0881	41.9283	N/A		11	0	N	High	2019-11-28 14:37:00
0-1350769		1350769	A-Felicia	2019-11-28 15:28:00	Location	Good	Valid	N/A	0	-70.0857	41.9203	N/A		11	0	N	High	2019-11-28 15:28:00
0-1350769		1350769	A-Felicia	2019-11-28 16:31:00	Location	Good	Valid	N/A	0	-70.0821	41.908	N/A		11	0	N	High	2019-11-28 16:31:00
0-1350769		1350769	A-Felicia	2019-11-28 17:37:00	Location	Good	Valid	N/A	0	-70.0821	41.898	N/A		11	0	N	High	2019-11-28 17:37:00
0-1350769		1350769	A-Felicia	2019-11-28 18:40:00	Location	Good	Valid	N/A	0	-70.0841	41.8913	N/A		11	0	N	High	2019-11-28 18:40:00
0-1350769		1350769	A-Felicia	2019-11-28 19:34:00	Location	Good	Valid	N/A	0	-70.0866	41.8861	N/A		11	0	N	High	2019-11-28 19:34:00
0-1350769		1350769	A-Felicia	2019-11-28 20:28:00	Location	Good	Valid	N/A	0	-70.0908	41.8801	N/A		11	0	N	High	2019-11-28 20:28:00
0-1350769		1350769	A-Felicia	2019-11-28 21:32:00	Location	Good	Valid	N/A	0	-70.0985	41.8711	N/A		11	0	N	High	2019-11-28 21:32:00
0-1350769		1350769	A-Felicia	2019-11-28 22:29:00	Location	Good	Valid	N/A	0	-70.1039	41.8594	N/A		11	0	N	High	2019-11-28 22:29:00
0-1350769		1350769	A-Felicia	2019-11-28 23:31:00	Location	Good	Valid	N/A	0	-70.1027	41.846	N/A		11	0	N	High	2019-11-28 23:31:00
0-1350769		1350769	A-Felicia	2019-11-29 00:33:00	Location	Good	Valid	N/A	0	-70.0892	41.8416	N/A		11	0	N	High	2019-11-29 00:33:00
0-1350769		1350769	A-Felicia	2019-11-29 01:31:00	Location	Good	Valid	N/A	0	-70.0685	41.8386	N/A		11	0	N	High	2019-11-29 01:31:00
0-1350769		1350769	A-Felicia	2019-11-29 02:26:00	Location	Good	Valid	N/A	0	-70.0499	41.8417	N/A		11	0	N	High	2019-11-29 02:26:00
0-1350769		1350769	A-Felicia	2019-11-29 03:27:00	Location	Good	Valid	N/A	0	-70.0378	41.8483	N/A		11	0	N	High	2019-11-29 03:27:00
0-1350769		1350769	A-Felicia	2019-11-29 04:42:00	Location	Good	Valid	N/A	0	-70.0302	41.8582	N/A		11	0	N	High	2019-11-29 04:42:00
0-1350769		1350769	A-Felicia	2019-11-29 05:36:00	Location	Good	Valid	N/A	0	-70.0281	41.8614	N/A		11	0	N	High	2019-11-29 05:36:00
0-1350769		1350769	A-Felicia	2019-11-29 06:31:00	Location	Good	Valid	N/A	0	-70.027	41.8622	N/A		11	0	N	High	2019-11-29 06:31:00
0-1350769		1350769	A-Felicia	2019-11-29 07:36:00	Location	Good	Valid	N/A	0	-70.0277	41.858	N/A		11	0	N	High	2019-11-29 07:36:00
0-1350769		1350769	A-Felicia	2019-11-29 08:32:00	Location	Good	Valid	N/A	0	-70.029	41.8515	N/A		11	0	N	High	2019-11-29 08:32:00
0-1350769		1350769	A-Felicia	2019-11-29 09:26:00	Location	Good	Valid	N/A	0	-70.0315	41.8442	N/A		11	0	N	High	2019-11-29 09:26:00
0-1350769		1350769	A-Felicia	2019-11-29 10:27:00	Location	Good	Valid	N/A	0	-70.0358	41.8371	N/A		11	0	N	High	2019-11-29 10:27:00
0-1350769		1350769	A-Felicia	2019-11-29 11:44:00	Location	Good	Valid	N/A	0	-70.0406	41.8289	N/A		11	0	N	High	2019-11-29 11:44:00
0-1350769		1350769	A-Felicia	2019-11-29 12:38:00	Location	Good	Valid	N/A	0	-70.0387	41.8274	N/A		11	0	N	High	2019-11-29 12:38:00
0-1350769		1350769	A-Felicia	2019-11-29 13:36:00	Location	Good	Valid	N/A	0	-70.0314	41.8298	N/A		11	0	N	High	2019-11-29 13:36:00
0-1350769		1350769	A-Felicia	2019-11-29 14:35:00	Location	Good	Valid	N/A	0	-70.0253	41.8335	N/A		11	0	N	High	2019-11-29 14:35:00
0-1350769		1350769	A-Felicia	2019-11-29 15:29:00	Location	Good	Valid	N/A	0	-70.0207	41.8366	N/A		11	0	N	High	2019-11-29 15:29:00
0-1350769		1350769	A-Felicia	2019-11-29 16:36:00	Location	Good	Valid	N/A	0	-70.015	41.8361	N/A		11	0	N	High	2019-11-29 16:36:00
0-1350769		1350769	A-Felicia	2019-11-29 17:26:00	Location	Good	Valid	N/A	0	-70.0129	41.8327	N/A		11	0	N	High	2019-11-29 17:26:00
0-1350769		1350769	A-Felicia	2019-11-29 18:28:00	Location	Good	Valid	N/A	0	-70.0125	41.8271	N/A		11	0	N	High	2019-11-29 18:28:00
0-1350769		1350769	A-Felicia	2019-11-29 19:31:00	Location	Good	Valid	N/A	0	-70.015	41.8217	N/A		11	0	N	High	2019-11-29 19:31:00
0-1350769		1350769	A-Felicia	2019-11-29 20:26:00	Location	Good	Valid	N/A	0	-70.0202	41.8175	N/A		11	0	N	High	2019-11-29 20:26:00
0-1350769		1350769	A-Felicia	2019-11-29 21:30:00	Location	Good	Valid	N/A	0	-70.0272	41.8131	N/A		11	0	N	High	2019-11-29 21:30:00
0-1350769		1350769	A-Felicia	2019-11-29 22:40:00	Location	Good	Valid	N/A	0	-70.0342	41.8105	N/A		11	0	N	High	2019-11-29 22:40:00
0-1350769		1350769	A-Felicia	2019-11-29 23:39:00	Location	Good	Valid	N/A	0	-70.0436	41.8095	N/A		11	0	N	High	2019-11-29 23:39:00
0-1350769		1350769	A-Felicia	2019-11-30 00:28:00	Location	Good	Valid	N/A	0	-70.0505	41.8082	N/A		11	0	N	High	2019-11-30 00:28:00
0-1350769		1350769	A-Felicia	2019-11-30 01:38:00	Location	Good	Valid	N/A	0	-70.0526	41.8058	N/A		11	0	N	High	2019-11-30 01:38:00
0-1350769		1350769	A-Felicia	2019-11-30 02:47:00	Location	Good	Valid	N/A	0	-70.0468	41.8042	N/A		11	0	N	High	2019-11-30 02:47:00
0-1350769		1350769	A-Felicia	2019-11-30 03:49:00	Location	Good	Valid	N/A	0	-70.041	41.8019	N/A		11	0	N	High	2019-11-30 03:49:00
0-1350769		1350769	A-Felicia	2019-11-30 04:59:00	Location	Good	Valid	N/A	0	-70.0363	41.8	N/A		11	0	N	High	2019-11-30 04:59:00
0-1350769		1350769	A-Felicia	2019-11-30 05:44:00	Location	Good	Valid	N/A	0	-70.0342	41.7997	N/A		11	0	N	High	2019-11-30 05:44:00
0-1350769		1350769	A-Felicia	2019-11-30 06:45:00	Location	Good	Valid	N/A	0	-70.0342	41.8015	N/A		11	0	N	High	2019-11-30 06:45:00
0-1350769		1350769	A-Felicia	2019-11-30 07:27:00	Location	Good	Valid	N/A	0	-70.0354	41.8034	N/A		11	0	N	High	2019-11-30 07:27:00
0-1350769		1350769	A-Felicia	2019-11-30 08:44:00	Location	Good	Valid	N/A	0	-70.0419	41.8069	N/A		11	0	N	High	2019-11-30 08:44:00
0-1350769		1350769	A-Felicia	2019-11-30 09:43:00	Location	Good	Valid	N/A	0	-70.0527	41.8086	N/A		11	0	N	High	2019-11-30 09:43:00
0-1350769		1350769	A-Felicia	2019-11-30 10:43:00	Location	Good	Valid	N/A	0	-70.0646	41.8077	N/A		11	0	N	High	2019-11-30 10:43:00
0-1350769		1350769	A-Felicia	2019-11-30 12:33:00	Location	Good	Valid	N/A	0	-70.0931	41.7996	N/A		11	0	N	High	2019-11-30 12:33:00
0-1350769		1350769	A-Felicia	2019-11-30 13:46:00	Location	Good	Valid	N/A	0	-70.0916	41.7969	N/A		11	0	N	High	2019-11-30 13:46:00
0-1350769		1350769	A-Felicia	2019-11-30 14:38:00	Location	Good	Valid	N/A	0	-70.0805	41.7976	N/A		11	0	N	High	2019-11-30 14:38:00
0-1350769		1350769	A-Felicia	2019-11-30 15:45:00	Location	Good	Valid	N/A	0	-70.0658	41.7982	N/A		11	0	N	High	2019-11-30 15:45:00
0-1350769		1350769	A-Felicia	2019-11-30 16:31:00	Location	Good	Valid	N/A	0	-70.0594	41.7974	N/A		11	0	N	High	2019-11-30 16:31:00
0-1350769		1350769	A-Felicia	2019-11-30 17:32:00	Location	Good	Valid	N/A	0	-70.0528	41.7953	N/A		11	0	N	High	2019-11-30 17:32:00
0-1350769		1350769	A-Felicia	2019-11-30 18:31:00	Location	Good	Valid	N/A	0	-70.0487	41.7946	N/A		11	0	N	High	2019-11-30 18:31:00
0-1350769		1350769	A-Felicia	2019-11-30 19:42:00	Location	Good	Valid	N/A	0	-70.0468	41.7951	N/A		11	0	N	High	2019-11-30 19:42:00
0-1350769		1350769	A-Felicia	2019-11-30 20:44:00	Location	Good	Valid	N/A	0	-70.0487	41.7973	N/A		11	0	N	High	2019-11-30 20:44:00
0-1350769		1350769	A-Felicia	2019-11-30 21:33:00	Location	Good	Valid	N/A	0	-70.0502	41.8004	N/A		11	0	N	High	2019-11-30 21:33:00
0-1350769		1350769	A-Felicia	2019-11-30 22:39:00	Location	Good	Valid	N/A	0	-70.0541	41.802	N/A		11	0	N	High	2019-11-30 22:39:00
0-1350769		1350769	A-Felicia	2019-11-30 23:28:00	Location	Good	Valid	N/A	0	-70.0628	41.801	N/A		11	0	N	High	2019-11-30 23:28:00
0-1350769		1350769	A-Felicia	2019-12-01 00:38:00	Location	Good	Valid	N/A	0	-70.0743	41.7987	N/A		11	0	N	High	2019-12-01 00:38:00
0-1350769		1350769	A-Felicia	2019-12-01 01:55:00	Location	Good	Valid	N/A	0	-70.074	41.7971	N/A		11	0	N	High	2019-12-01 01:55:00
0-1350769		1350769	A-Felicia	2019-12-01 03:33:00	Location	Good	Valid	N/A	0	-70.0604	41.7951	N/A		11	0	N	High	2019-12-01 03:33:00
0-1350769		1350769	A-Felicia	2019-12-01 04:29:00	Location	Good	Valid	N/A	0	-70.0578	41.7919	N/A		11	0	N	High	2019-12-01 04:29:00
0-1350769		1350769	A-Felicia	2019-12-01 05:46:00	Location	Good	Valid	N/A	0	-70.0558	41.7876	N/A		11	0	N	High	2019-12-01 05:46:00
0-1350769		1350769	A-Felicia	2019-12-01 06:28:00	Location	Good	Valid	N/A	0	-70.0556	41.786	N/A		11	0	N	High	2019-12-01 06:28:00
0-1350769		1350769	A-Felicia	2019-12-01 07:33:00	Location	Good	Valid	N/A	0	-70.0587	41.7842	N/A		11	0	N	High	2019-12-01 07:33:00
0-1350769		1350769	A-Felicia	2019-12-01 08:29:00	Location	Good	Valid	N/A	0	-70.0643	41.7829	N/A		11	0	N	High	2019-12-01 08:29:00
0-1350769		1350769	A-Felicia	2019-12-01 09:33:00	Location	Good	Valid	N/A	0	-70.0713	41.783	N/A		11	0	N	High	2019-12-01 09:33:00
0-1350769		1350769	A-Felicia	2019-12-01 10:34:00	Location	Good	Valid	N/A	0	-70.0763	41.7843	N/A		11	0	N	High	2019-12-01 10:34:00
0-1350769		1350769	A-Felicia	2019-12-01 11:34:00	Location	Good	Valid	N/A	0	-70.078	41.7853	N/A		11	0	N	High	2019-12-01 11:34:00
0-1350769		1350769	A-Felicia	2019-12-01 12:40:00	Location	Good	Valid	N/A	0	-70.078	41.7853	N/A		11	0	N	High	2019-12-01 12:40:00
0-1350769		1350769	A-Felicia	2019-12-01 15:38:00	Location	Good	Valid	N/A	1	-70.078	41.7853	N/A		11	0	N	High	2019-12-01 15:38:00
0-1350769		1350769	A-Felicia	2019-12-01 16:48:00	Location	Good	Valid	N/A	0	-70.0778	41.7826	N/A		11	0	N	High	2019-12-01 16:48:00
0-1350769		1350769	A-Felicia	2019-12-01 17:33:00	Location	Good	Valid	N/A	0	-70.0777	41.7802	N/A		11	0	N	High	2019-12-01 17:33:00
0-1350769		1350769	A-Felicia	2019-12-01 18:30:00	Location	Good	Valid	N/A	0	-70.0773	41.778	N/A		11	0	N	High	2019-12-01 18:30:00
0-1350769		1350769	A-Felicia	2019-12-01 19:40:00	Location	Good	Valid	N/A	0	-70.0811	41.7762	N/A		11	0	N	High	2019-12-01 19:40:00
0-1350769		1350769	A-Felicia	2019-12-01 20:34:00	Location	Good	Valid	N/A	0	-70.0882	41.7751	N/A		11	0	N	High	2019-12-01 20:34:00
0-1350769		1350769	A-Felicia	2019-12-01 21:31:00	Location	Good	Valid	N/A	0	-70.0973	41.7744	N/A		11	0	N	High	2019-12-01 21:31:00
0-1350769		1350769	A-Felicia	2019-12-01 22:48:00	Location	Good	Valid	N/A	0	-70.1071	41.776	N/A		11	0	N	High	2019-12-01 22:48:00
0-1350769		1350769	A-Felicia	2019-12-01 23:28:00	Location	Good	Valid	N/A	0	-70.1112	41.7785	N/A		11	0	N	High	2019-12-01 23:28:00
0-1350769		1350769	A-Felicia	2019-12-02 00:34:00	Location	Good	Valid	N/A	0	-70.1211	41.7785	N/A		11	0	N	High	2019-12-02 00:34:00
0-1350769		1350769	A-Felicia	2019-12-02 01:46:00	Location	Good	Valid	N/A	0	-70.1302	41.7752	N/A		11	0	N	High	2019-12-02 01:46:00
0-1350769		1350769	A-Felicia	2019-12-02 02:48:00	Location	Good	Valid	N/A	0	-70.1319	41.774	N/A		11	0	N	High	2019-12-02 02:48:00
0-1350769		1350769	A-Felicia	2019-12-02 03:39:00	Location	Good	Valid	N/A	0	-70.1294	41.7742	N/A		11	0	N	High	2019-12-02 03:39:00
0-1350769		1350769	A-Felicia	2019-12-02 04:39:00	Location	Good	Valid	N/A	0	-70.1265	41.7744	N/A		11	0	N	High	2019-12-02 04:39:00
0-1350769		1350769	A-Felicia	2019-12-02 05:36:00	Location	Good	Valid	N/A	0	-70.1238	41.7746	N/A		11	0	N	High	2019-12-02 05:36:00
0-1350769		1350769	A-Felicia	2019-12-02 06:37:00	Location	Good	Valid	N/A	0	-70.1231	41.7736	N/A		11	0	N	High	2019-12-02 06:37:00
0-1350769		1350769	A-Felicia	2019-12-02 07:41:00	Location	Good	Valid	N/A	0	-70.1264	41.7717	N/A		11	0	N	High	2019-12-02 07:41:00
0-1350769		1350769	A-Felicia	2019-12-02 08:43:00	Location	Good	Valid	N/A	0	-70.1417	41.7669	N/A		11	0	N	High	2019-12-02 08:43:00
0-1350769		1350769	A-Felicia	2019-12-02 09:47:00	Location	Good	Valid	N/A	0	-70.1559	41.7627	N/A		11	0	N	High	2019-12-02 09:47:00
0-1350769		1350769	A-Felicia	2019-12-02 10:46:00	Location	Good	Valid	N/A	0	-70.1705	41.7598	N/A		11	0	N	High	2019-12-02 10:46:00
0-1350769		1350769	A-Felicia	2019-12-02 11:41:00	Location	Good	Valid	N/A	0	-70.1846	41.7575	N/A		11	0	N	High	2019-12-02 11:41:00
0-1350769		1350769	A-Felicia	2019-12-02 12:39:00	Location	Good	Valid	N/A	0	-70.2022	41.7551	N/A		11	0	N	High	2019-12-02 12:39:00
0-1350769		1350769	A-Felicia	2019-12-02 13:48:00	Location	Good	Valid	N/A	0	-70.2195	41.7511	N/A		11	0	N	High	2019-12-02 13:48:00
0-1350769		1350769	A-Felicia	2019-12-02 14:35:00	Location	Good	Valid	N/A	0	-70.2292	41.7491	N/A		11	0	N	High	2019-12-02 14:35:00
0-1350769		1350769	A-Felicia	2019-12-02 15:31:00	Location	Good	Valid	N/A	0	-70.2411	41.7462	N/A		11	0	N	High	2019-12-02 15:31:00
0-1350769		1350769	A-Felicia	2019-12-02 16:58:00	Location	Good	Valid	N/A	0	-70.2586	41.7378	N/A		11	0	N	High	2019-12-02 16:58:00
0-1350769		1350769	A-Felicia	2019-12-02 17:50:00	Location	Good	Valid	N/A	0	-70.2662	41.7296	N/A		11	0	N	High	2019-12-02 17:50:00
0-1350769		1350769	A-Felicia	2019-12-02 18:35:00	Location	Good	Valid	N/A	0	-70.273	41.7194	N/A		11	0	N	High	2019-12-02 18:35:00
0-1350769		1350769	A-Felicia	2019-12-02 19:44:00	Location	Good	Valid	N/A	0	-70.2953	41.7133	N/A		11	0	N	High	2019-12-02 19:44:00
0-1350769		1350769	A-Felicia	2019-12-02 20:48:00	Location	Good	Valid	N/A	0	-70.3078	41.7116	N/A		11	0	N	High	2019-12-02 20:48:00
0-1350769		1350769	A-Felicia	2019-12-02 21:49:00	Location	Good	Valid	N/A	0	-70.3058	41.7112	N/A		11	0	N	High	2019-12-02 21:49:00
0-1350769		1350769	A-Felicia	2019-12-02 22:33:00	Location	Good	Valid	N/A	0	-70.2974	41.7109	N/A		11	0	N	High	2019-12-02 22:33:00
0-1350769		1350769	A-Felicia	2019-12-02 23:38:00	Location	Good	Valid	N/A	0	-70.2812	41.7113	N/A		11	0	N	High	2019-12-02 23:38:00
0-1350769		1350769	A-Felicia	2019-12-03 00:48:00	Location	Good	Valid	N/A	0	-70.27	41.7183	N/A		11	0	N	High	2019-12-03 00:48:00
0-1350769		1350769	A-Felicia	2019-12-03 01:51:00	Location	Good	Valid	N/A	0	-70.2746	41.7396	N/A		11	0	N	High	2019-12-03 01:51:00
0-1350769		1350769	A-Felicia	2019-12-03 02:49:00	Location	Good	Valid	N/A	0	-70.2969	41.7398	N/A		11	0	N	High	2019-12-03 02:49:00
0-1350769		1350769	A-Felicia	2019-12-03 03:54:00	Location	Good	Valid	N/A	0	-70.3022	41.7366	N/A		11	0	N	High	2019-12-03 03:54:00
0-1350769		1350769	A-Felicia	2019-12-03 04:35:00	Location	Good	Valid	N/A	0	-70.3041	41.7351	N/A		11	0	N	High	2019-12-03 04:35:00
0-1350769		1350769	A-Felicia	2019-12-03 05:46:00	Location	Good	Valid	N/A	0	-70.3044	41.735	N/A		11	0	N	High	2019-12-03 05:46:00
0-1350769		1350769	A-Felicia	2019-12-03 06:48:00	Location	Good	Valid	N/A	0	-70.3044	41.7349	N/A		11	0	N	High	2019-12-03 06:48:00
0-1350769		1350769	A-Felicia	2019-12-03 07:49:00	Location	Good	Valid	N/A	0	-70.3042	41.7349	N/A		11	0	N	High	2019-12-03 07:49:00
0-1350769		1350769	A-Felicia	2019-12-03 09:47:00	Location	Good	Valid	N/A	0	-70.3041	41.7348	N/A		11	0	N	High	2019-12-03 09:47:00
0-1350769		1350769	A-Felicia	2019-12-03 10:35:00	Location	Good	Valid	N/A	0	-70.3041	41.7348	N/A		11	0	N	High	2019-12-03 10:35:00
0-1350769		1350769	A-Felicia	2019-12-03 11:36:00	Location	Good	Valid	N/A	0	-70.3041	41.7348	N/A		11	0	N	High	2019-12-03 11:36:00
0-1350769		1350769	A-Felicia	2019-12-03 13:37:00	Location	Good	Valid	N/A	0	-70.3041	41.7348	N/A		11	0	N	High	2019-12-03 13:37:00
0-1350769		1350769	A-Felicia	2019-12-03 15:39:00	Location	Good	Valid	N/A	0	-70.3041	41.7348	N/A		11	0	N	High	2019-12-03 15:39:00
0-1350769		1350769	A-Felicia	2019-12-03 16:40:00	Location	Good	Valid	N/A	0	-70.3042	41.7349	N/A		11	0	N	High	2019-12-03 16:40:00
0-1350769		1350769	A-Felicia	2019-12-03 18:48:00	Location	Good	Valid	N/A	0	-70.3041	41.7348	N/A		11	0	N	High	2019-12-03 18:48:00
0-1350769		1350769	A-Felicia	2019-12-03 19:47:00	Location	Good	Valid	N/A	0	-70.3041	41.7348	N/A		11	0	N	High	2019-12-03 19:47:00
0-1350769		1350769	A-Felicia	2019-12-03 20:44:00	Location	Good	Valid	N/A	0	-70.3041	41.7349	N/A		11	0	N	High	2019-12-03 20:44:00
0-1350769		1350769	A-Felicia	2019-12-03 21:47:00	Location	Good	Valid	N/A	0	-70.3041	41.7349	N/A		11	0	N	High	2019-12-03 21:47:00
0-1350769		1350769	A-Felicia	2019-12-03 22:34:00	Location	Good	Valid	N/A	0	-70.3041	41.7348	N/A		11	0	N	High	2019-12-03 22:34:00
0-1350769		1350769	A-Felicia	2019-12-03 23:42:00	Location	Good	Valid	N/A	0	-70.3041	41.7348	N/A		11	0	N	High	2019-12-03 23:42:00
