# Supplementary material for: Developing bottom drifters to better understand the stranding locations of cold-stunned sea turtles in Cape Cod Bay, Massachusetts
Source: PeerJ. 2023 Aug 30;11:e15866. doi: 10.7717/peerj.15866 (PMC10474834; doi:10.7717/peerj.15866)
Supplement: Supplemental Information 15 [file peerj-11-15866-s015.xlsx]

## Sheet: Sheet1
ESN	SeqNo	ESN	Unit Name	Message Time GMT	Message Subtype	Battery Condition	GPS Data	Missed Alarm	GPS Fail Counter	Longitude	Latitude	Message Trigger	Message Trigger State	Inputs 1-2	Alarms 1-2	Moving	GPS Fix Confidence	Message Time GMT
0-1367212		1367212	A-Felicia	2019-11-19 11:30:00	Turned On	Good	Valid	N/A	0	-71.5149	41.465	N/A		11	0	N	High	2019-11-19 11:30:00
0-1367212		1367212	A-Felicia	2019-11-19 12:22:00	Location	Good	Valid	N/A	0	-71.1399	41.6772	N/A		11	0	N	High	2019-11-19 12:22:00
0-1367212		1367212	A-Felicia	2019-11-19 13:25:00	Location	Good	Valid	N/A	0	-70.1536	41.694	N/A		11	0	N	High	2019-11-19 13:25:00
0-1367212		1367212	A-Felicia	2019-11-19 14:24:00	Location	Good	Valid	N/A	0	-70.1534	41.7523	N/A		11	0	N	High	2019-11-19 14:24:00
0-1367212		1367212	A-Felicia	2019-11-19 15:20:00	Location	Good	Valid	N/A	0	-70.1332	41.895	N/A		11	0	N	High	2019-11-19 15:20:00
0-1367212		1367212	A-Felicia	2019-11-19 16:25:00	Location	Good	Valid	N/A	0	-70.1286	41.8967	N/A		11	0	N	High	2019-11-19 16:25:00
0-1367212		1367212	A-Felicia	2019-11-19 17:19:00	Location	Good	Valid	N/A	0	-70.1236	41.895	N/A		11	0	N	High	2019-11-19 17:19:00
0-1367212		1367212	A-Felicia	2019-11-19 18:21:00	Location	Good	Valid	N/A	0	-70.118	41.892	N/A		11	0	N	High	2019-11-19 18:21:00
0-1367212		1367212	A-Felicia	2019-11-19 19:21:00	Location	Good	Valid	N/A	0	-70.1116	41.8877	N/A		11	0	N	High	2019-11-19 19:21:00
0-1367212		1367212	A-Felicia	2019-11-19 20:35:00	Location	Good	Valid	N/A	0	-70.106	41.8842	N/A		11	0	N	High	2019-11-19 20:35:00
0-1367212		1367212	A-Felicia	2019-11-19 21:46:00	Location	Good	Valid	N/A	0	-70.1074	41.8872	N/A		11	0	N	High	2019-11-19 21:46:00
0-1367212		1367212	A-Felicia	2019-11-19 22:30:00	Location	Good	Valid	N/A	0	-70.1094	41.8925	N/A		11	0	N	High	2019-11-19 22:30:00
0-1367212		1367212	A-Felicia	2019-11-19 23:33:00	Location	Good	Valid	N/A	0	-70.1105	41.8973	N/A		11	0	N	High	2019-11-19 23:33:00
0-1367212		1367212	A-Felicia	2019-11-20 00:42:00	Location	Good	Valid	N/A	0	-70.1125	41.9015	N/A		11	0	N	High	2019-11-20 00:42:00
0-1367212		1367212	A-Felicia	2019-11-20 01:19:00	Location	Good	Valid	N/A	0	-70.1158	41.9049	N/A		11	0	N	High	2019-11-20 01:19:00
0-1367212		1367212	A-Felicia	2019-11-20 02:19:00	Location	Good	Valid	N/A	0	-70.1186	41.908	N/A		11	0	N	High	2019-11-20 02:19:00
0-1367212		1367212	A-Felicia	2019-11-20 03:21:00	Location	Good	Valid	N/A	0	-70.1205	41.9077	N/A		11	0	N	High	2019-11-20 03:21:00
0-1367212		1367212	A-Felicia	2019-11-20 04:22:00	Location	Good	Valid	N/A	0	-70.1206	41.9038	N/A		11	0	N	High	2019-11-20 04:22:00
0-1367212		1367212	A-Felicia	2019-11-20 05:26:00	Location	Good	Valid	N/A	0	-70.1194	41.8972	N/A		11	0	N	High	2019-11-20 05:26:00
0-1367212		1367212	A-Felicia	2019-11-20 06:25:00	Location	Good	Valid	N/A	0	-70.1174	41.8909	N/A		11	0	N	High	2019-11-20 06:25:00
0-1367212		1367212	A-Felicia	2019-11-20 07:32:00	Location	Good	Valid	N/A	0	-70.1127	41.8813	N/A		11	0	N	High	2019-11-20 07:32:00
0-1367212		1367212	A-Felicia	2019-11-20 08:31:00	Location	Good	Valid	N/A	0	-70.1093	41.8775	N/A		11	0	N	High	2019-11-20 08:31:00
0-1367212		1367212	A-Felicia	2019-11-20 09:30:00	Location	Good	Valid	N/A	0	-70.1103	41.8747	N/A		11	0	N	High	2019-11-20 09:30:00
0-1367212		1367212	A-Felicia	2019-11-20 10:17:00	Location	Good	Valid	N/A	0	-70.1152	41.8745	N/A		11	0	N	High	2019-11-20 10:17:00
0-1367212		1367212	A-Felicia	2019-11-20 11:33:00	Location	Good	Valid	N/A	0	-70.125	41.8767	N/A		11	0	N	High	2019-11-20 11:33:00
0-1367212		1367212	A-Felicia	2019-11-20 12:43:00	Location	Good	Valid	N/A	0	-70.1308	41.8788	N/A		11	0	N	High	2019-11-20 12:43:00
0-1367212		1367212	A-Felicia	2019-11-20 14:24:00	Location	Good	Valid	N/A	0	-70.1402	41.8832	N/A		11	0	N	High	2019-11-20 14:24:00
0-1367212		1367212	A-Felicia	2019-11-20 15:22:00	Location	Good	Valid	N/A	0	-70.1429	41.883	N/A		11	0	N	High	2019-11-20 15:22:00
0-1367212		1367212	A-Felicia	2019-11-20 16:35:00	Location	Good	Valid	N/A	0	-70.1426	41.8769	N/A		11	0	N	High	2019-11-20 16:35:00
0-1367212		1367212	A-Felicia	2019-11-20 17:16:00	Location	Good	Valid	N/A	0	-70.1413	41.8696	N/A		11	0	N	High	2019-11-20 17:16:00
0-1367212		1367212	A-Felicia	2019-11-20 18:28:00	Location	Good	Valid	N/A	0	-70.1395	41.8595	N/A		11	0	N	High	2019-11-20 18:28:00
0-1367212		1367212	A-Felicia	2019-11-20 19:33:00	Location	Good	Valid	N/A	0	-70.138	41.8541	N/A		11	0	N	High	2019-11-20 19:33:00
0-1367212		1367212	A-Felicia	2019-11-20 20:51:00	Location	Good	Valid	N/A	0	-70.1367	41.8499	N/A		11	0	N	High	2019-11-20 20:51:00
0-1367212		1367212	A-Felicia	2019-11-20 21:36:00	Location	Good	Valid	N/A	0	-70.1356	41.8464	N/A		11	0	N	High	2019-11-20 21:36:00
0-1367212		1367212	A-Felicia	2019-11-20 22:22:00	Location	Good	Valid	N/A	0	-70.1366	41.8429	N/A		11	0	N	High	2019-11-20 22:22:00
0-1367212		1367212	A-Felicia	2019-11-20 23:32:00	Location	Good	Valid	N/A	0	-70.1422	41.8403	N/A		11	0	N	High	2019-11-20 23:32:00
0-1367212		1367212	A-Felicia	2019-11-21 00:31:00	Location	Good	Valid	N/A	0	-70.1475	41.84	N/A		11	0	N	High	2019-11-21 00:31:00
0-1367212		1367212	A-Felicia	2019-11-21 01:23:00	Location	Good	Valid	N/A	0	-70.1545	41.8406	N/A		11	0	N	High	2019-11-21 01:23:00
0-1367212		1367212	A-Felicia	2019-11-21 02:31:00	Location	Good	Valid	N/A	0	-70.162	41.8409	N/A		11	0	N	High	2019-11-21 02:31:00
0-1367212		1367212	A-Felicia	2019-11-21 03:43:00	Location	Good	Valid	N/A	0	-70.1695	41.8403	N/A		11	0	N	High	2019-11-21 03:43:00
0-1367212		1367212	A-Felicia	2019-11-21 04:42:00	Location	Good	Valid	N/A	0	-70.173	41.836	N/A		11	0	N	High	2019-11-21 04:42:00
0-1367212		1367212	A-Felicia	2019-11-21 05:18:00	Location	Good	Valid	N/A	0	-70.1723	41.8314	N/A		11	0	N	High	2019-11-21 05:18:00
0-1367212		1367212	A-Felicia	2019-11-21 06:31:00	Location	Good	Valid	N/A	0	-70.17	41.8252	N/A		11	0	N	High	2019-11-21 06:31:00
0-1367212		1367212	A-Felicia	2019-11-21 07:26:00	Location	Good	Valid	N/A	0	-70.1672	41.8199	N/A		11	0	N	High	2019-11-21 07:26:00
0-1367212		1367212	A-Felicia	2019-11-21 08:31:00	Location	Good	Valid	N/A	0	-70.1577	41.8118	N/A		11	0	N	High	2019-11-21 08:31:00
0-1367212		1367212	A-Felicia	2019-11-21 09:17:00	Location	Good	Valid	N/A	0	-70.1478	41.8082	N/A		11	0	N	High	2019-11-21 09:17:00
0-1367212		1367212	A-Felicia	2019-11-21 10:26:00	Location	Good	Valid	N/A	0	-70.1341	41.8049	N/A		11	0	N	High	2019-11-21 10:26:00
0-1367212		1367212	A-Felicia	2019-11-21 11:26:00	Location	Good	Valid	N/A	0	-70.1276	41.8028	N/A		11	0	N	High	2019-11-21 11:26:00
0-1367212		1367212	A-Felicia	2019-11-21 13:33:00	Location	Good	Valid	N/A	0	-70.1327	41.7957	N/A		11	0	N	High	2019-11-21 13:33:00
0-1367212		1367212	A-Felicia	2019-11-21 14:32:00	Location	Good	Valid	N/A	0	-70.1378	41.7924	N/A		11	0	N	High	2019-11-21 14:32:00
0-1367212		1367212	A-Felicia	2019-11-21 15:21:00	Location	Good	Valid	N/A	0	-70.1443	41.7889	N/A		11	0	N	High	2019-11-21 15:21:00
0-1367212		1367212	A-Felicia	2019-11-21 16:42:00	Location	Good	Valid	N/A	0	-70.1499	41.7851	N/A		11	0	N	High	2019-11-21 16:42:00
0-1367212		1367212	A-Felicia	2019-11-21 17:22:00	Location	Good	Valid	N/A	0	-70.1512	41.7823	N/A		11	0	N	High	2019-11-21 17:22:00
0-1367212		1367212	A-Felicia	2019-11-21 18:21:00	Location	Good	Valid	N/A	0	-70.1502	41.7795	N/A		11	0	N	High	2019-11-21 18:21:00
0-1367212		1367212	A-Felicia	2019-11-21 19:34:00	Location	Good	Valid	N/A	0	-70.1457	41.7772	N/A		11	0	N	High	2019-11-21 19:34:00
0-1367212		1367212	A-Felicia	2019-11-21 20:22:00	Location	Good	Valid	N/A	0	-70.1413	41.7763	N/A		11	0	N	High	2019-11-21 20:22:00
0-1367212		1367212	A-Felicia	2019-11-21 21:18:00	Location	Good	Valid	N/A	0	-70.1361	41.776	N/A		11	0	N	High	2019-11-21 21:18:00
0-1367212		1367212	A-Felicia	2019-11-21 22:37:00	Location	Good	Valid	N/A	0	-70.1294	41.7767	N/A		11	0	N	High	2019-11-21 22:37:00
0-1367212		1367212	A-Felicia	2019-11-21 23:29:00	Location	Good	Valid	N/A	0	-70.1274	41.7773	N/A		11	0	N	High	2019-11-21 23:29:00
0-1367212		1367212	A-Felicia	2019-11-22 00:26:00	Location	Good	Valid	N/A	0	-70.1268	41.7786	N/A		11	0	N	High	2019-11-22 00:26:00
0-1367212		1367212	A-Felicia	2019-11-22 01:38:00	Location	Good	Valid	N/A	0	-70.1278	41.7795	N/A		11	0	N	High	2019-11-22 01:38:00
0-1367212		1367212	A-Felicia	2019-11-22 02:39:00	Location	Good	Valid	N/A	0	-70.1283	41.7795	N/A		11	0	N	High	2019-11-22 02:39:00
0-1367212		1367212	A-Felicia	2019-11-22 03:33:00	Location	Good	Valid	N/A	0	-70.1288	41.7795	N/A		11	0	N	High	2019-11-22 03:33:00
0-1367212		1367212	A-Felicia	2019-11-22 04:35:00	Location	Good	Valid	N/A	0	-70.1294	41.7795	N/A		11	0	N	High	2019-11-22 04:35:00
0-1367212		1367212	A-Felicia	2019-11-22 05:18:00	Location	Good	Valid	N/A	0	-70.1293	41.7795	N/A		11	0	N	High	2019-11-22 05:18:00
0-1367212		1367212	A-Felicia	2019-11-22 06:22:00	Location	Good	Valid	N/A	0	-70.1293	41.7794	N/A		11	0	N	High	2019-11-22 06:22:00
0-1367212		1367212	A-Felicia	2019-11-22 07:24:00	Location	Good	Valid	N/A	0	-70.1292	41.7795	N/A		11	0	N	High	2019-11-22 07:24:00
0-1367212		1367212	A-Felicia	2019-11-22 08:19:00	Location	Good	Valid	N/A	0	-70.1292	41.7795	N/A		11	0	N	High	2019-11-22 08:19:00
0-1367212		1367212	A-Felicia	2019-11-22 09:33:00	Location	Good	Valid	N/A	0	-70.1274	41.78	N/A		11	0	N	High	2019-11-22 09:33:00
0-1367212		1367212	A-Felicia	2019-11-22 10:21:00	Location	Good	Valid	N/A	0	-70.1238	41.781	N/A		11	0	N	High	2019-11-22 10:21:00
0-1367212		1367212	A-Felicia	2019-11-22 11:28:00	Location	Good	Valid	N/A	0	-70.1197	41.7824	N/A		11	0	N	High	2019-11-22 11:28:00
0-1367212		1367212	A-Felicia	2019-11-22 12:25:00	Location	Good	Valid	N/A	0	-70.1177	41.7837	N/A		11	0	N	High	2019-11-22 12:25:00
0-1367212		1367212	A-Felicia	2019-11-22 13:37:00	Location	Good	Valid	N/A	0	-70.116	41.7857	N/A		11	0	N	High	2019-11-22 13:37:00
0-1367212		1367212	A-Felicia	2019-11-22 14:25:00	Location	Good	Valid	N/A	0	-70.1153	41.7876	N/A		11	0	N	High	2019-11-22 14:25:00
0-1367212		1367212	A-Felicia	2019-11-22 16:43:00	Location	Good	Valid	N/A	0	-70.1182	41.7901	N/A		11	0	N	High	2019-11-22 16:43:00
0-1367212		1367212	A-Felicia	2019-11-22 17:38:00	Location	Good	Valid	N/A	0	-70.1201	41.7908	N/A		11	0	N	High	2019-11-22 17:38:00
0-1367212		1367212	A-Felicia	2019-11-22 19:26:00	Location	Good	Valid	N/A	0	-70.1164	41.7924	N/A		11	0	N	High	2019-11-22 19:26:00
0-1367212		1367212	A-Felicia	2019-11-22 20:35:00	Location	Good	Valid	N/A	0	-70.1121	41.7935	N/A		11	0	N	High	2019-11-22 20:35:00
0-1367212		1367212	A-Felicia	2019-11-22 21:40:00	Location	Good	Valid	N/A	0	-70.1056	41.7944	N/A		11	0	N	Low	2019-11-22 21:40:00
0-1367212		1367212	A-Felicia	2019-11-22 22:41:00	Location	Good	Valid	N/A	0	-70.1011	41.7949	N/A		11	0	N	High	2019-11-22 22:41:00
0-1367212		1367212	A-Felicia	2019-11-22 23:22:00	Location	Good	Valid	N/A	0	-70.0934	41.7956	N/A		11	0	N	Low	2019-11-22 23:22:00
0-1367212		1367212	A-Felicia	2019-11-23 01:27:00	Location	Good	Valid	N/A	1	-70.0821	41.7944	N/A		11	0	N	Low	2019-11-23 01:27:00
0-1367212		1367212	A-Felicia	2019-11-23 03:35:00	Location	Good	Valid	N/A	0	-70.0782	41.7934	N/A		11	0	N	Low	2019-11-23 03:35:00
0-1367212		1367212	A-Felicia	2019-11-23 05:43:00	Location	Good	Valid	N/A	1	-70.0673	41.7967	N/A		11	0	N	Low	2019-11-23 05:43:00
0-1367212		1367212	A-Felicia	2019-11-23 09:32:00	Location	Good	Valid	N/A	0	-70.0524	41.7963	N/A		11	0	N	High	2019-11-23 09:32:00
0-1367212		1367212	A-Felicia	2019-11-23 12:44:00	Location	Good	Valid	N/A	2	-70.0479	41.7934	N/A		11	0	N	High	2019-11-23 12:44:00
0-1367212		1367212	A-Felicia	2019-11-23 15:44:00	Location	Good	Valid	N/A	1	-70.0456	41.7927	N/A		11	0	N	High	2019-11-23 15:44:00
0-1367212		1367212	A-Felicia	2019-11-23 21:49:00	Location	Good	Valid	N/A	3	-70.0452	41.793	N/A		11	0	N	High	2019-11-23 21:49:00
0-1367212		1367212	A-Felicia	2019-11-23 23:37:00	Location	Good	Valid	N/A	0	-70.0452	41.793	N/A		11	0	N	High	2019-11-23 23:37:00
0-1367212		1367212	A-Felicia	2019-11-24 00:32:00	Location	Good	Valid	N/A	0	-70.0452	41.793	N/A		11	0	N	High	2019-11-24 00:32:00
0-1367212		1367212	A-Felicia	2019-11-24 01:32:00	Location	Good	Valid	N/A	0	-70.0452	41.793	N/A		11	0	N	High	2019-11-24 01:32:00
0-1367212		1367212	A-Felicia	2019-11-24 02:27:00	Location	Good	Valid	N/A	0	-70.0452	41.7929	N/A		11	0	N	High	2019-11-24 02:27:00
0-1367212		1367212	A-Felicia	2019-11-24 03:34:00	Location	Good	Valid	N/A	0	-70.0452	41.793	N/A		11	0	N	High	2019-11-24 03:34:00
0-1367212		1367212	A-Felicia	2019-11-24 04:27:00	Location	Good	Valid	N/A	0	-70.0452	41.793	N/A		11	0	N	High	2019-11-24 04:27:00
0-1367212		1367212	A-Felicia	2019-11-24 05:40:00	Location	Good	Valid	N/A	0	-70.0452	41.793	N/A		11	0	N	High	2019-11-24 05:40:00
0-1367212		1367212	A-Felicia	2019-11-24 06:34:00	Location	Good	Valid	N/A	0	-70.0452	41.793	N/A		11	0	N	Low	2019-11-24 06:34:00
0-1367212		1367212	A-Felicia	2019-11-24 08:52:00	Location	Good	Valid	N/A	0	-70.0452	41.793	N/A		11	0	N	High	2019-11-24 08:52:00
0-1367212		1367212	A-Felicia	2019-11-24 09:37:00	Location	Good	Valid	N/A	0	-70.0452	41.793	N/A		11	0	N	High	2019-11-24 09:37:00
0-1367212		1367212	A-Felicia	2019-11-24 10:47:00	Location	Good	Valid	N/A	0	-70.0452	41.793	N/A		11	0	N	High	2019-11-24 10:47:00
0-1367212		1367212	A-Felicia	2019-11-24 11:34:00	Location	Good	Valid	N/A	0	-70.0452	41.793	N/A		11	0	N	High	2019-11-24 11:34:00
0-1367212		1367212	A-Felicia	2019-11-24 12:29:00	Location	Good	Valid	N/A	0	-70.0452	41.793	N/A		11	0	N	High	2019-11-24 12:29:00
0-1367212		1367212	A-Felicia	2019-11-24 13:30:00	Location	Good	Valid	N/A	0	-70.0453	41.793	N/A		11	0	N	High	2019-11-24 13:30:00
0-1367212		1367212	A-Felicia	2019-11-24 14:37:00	Location	Good	Valid	N/A	0	-70.0452	41.7929	N/A		11	0	N	Low	2019-11-24 14:37:00
0-1367212		1367212	A-Felicia	2019-11-24 15:28:00	Location	Good	Valid	N/A	0	-70.0453	41.793	N/A		11	0	N	Low	2019-11-24 15:28:00
0-1367212		1367212	A-Felicia	2019-11-24 19:40:00	Location	Good	Valid	N/A	3	-70.0457	41.7936	N/A		11	0	N	Low	2019-11-24 19:40:00
0-1367212		1367212	A-Felicia	2019-11-24 22:41:00	Location	Good	Valid	N/A	2	-70.0454	41.7936	N/A		11	0	N	High	2019-11-24 22:41:00
0-1367212		1367212	A-Felicia	2019-11-24 23:50:00	Location	Good	Valid	N/A	0	-70.0453	41.7935	N/A		11	0	N	Low	2019-11-24 23:50:00
0-1367212		1367212	A-Felicia	2019-11-25 03:51:00	Location	Good	Valid	N/A	1	-70.0338	41.7945	N/A		11	0	N	High	2019-11-25 03:51:00
0-1367212		1367212	A-Felicia	2019-11-25 08:45:00	Location	Good	Valid	N/A	0	-70.0299	41.7981	N/A		11	0	N	High	2019-11-25 08:45:00
0-1367212		1367212	A-Felicia	2019-11-25 21:54:00	Location	Good	Valid	N/A	0	-70.0235	41.7955	N/A		11	0	N	High	2019-11-25 21:54:00
0-1367212		1367212	A-Felicia	2019-11-25 22:26:00	Location	Good	Valid	N/A	0	-70.0235	41.7955	N/A		11	0	N	High	2019-11-25 22:26:00
0-1367212		1367212	A-Felicia	2019-11-25 23:37:00	Location	Good	Valid	N/A	0	-70.0231	41.7954	N/A		11	0	N	High	2019-11-25 23:37:00
0-1367212		1367212	A-Felicia	2019-11-26 00:22:00	Location	Good	Valid	N/A	0	-70.023	41.7954	N/A		11	0	N	High	2019-11-26 00:22:00
0-1367212		1367212	A-Felicia	2019-11-26 02:35:00	Location	Good	Valid	N/A	1	-70.023	41.7954	N/A		11	0	N	Low	2019-11-26 02:35:00
0-1367212		1367212	A-Felicia	2019-11-26 09:48:00	Location	Good	Valid	N/A	0	-70.0233	41.7955	N/A		11	0	N	Low	2019-11-26 09:48:00
0-1367212		1367212	A-Felicia	2019-11-26 10:31:00	Location	Good	Valid	N/A	0	-70.0233	41.7955	N/A		11	0	N	High	2019-11-26 10:31:00
0-1367212		1367212	A-Felicia	2019-11-26 11:38:00	Location	Good	Valid	N/A	0	-70.0231	41.7954	N/A		11	0	N	High	2019-11-26 11:38:00
0-1367212		1367212	A-Felicia	2019-11-26 13:36:00	Location	Good	Valid	N/A	0	-70.0231	41.7955	N/A		11	0	N	High	2019-11-26 13:36:00
0-1367212		1367212	A-Felicia	2019-11-26 14:47:00	Location	Good	Valid	N/A	0	-70.0231	41.7955	N/A		11	0	N	High	2019-11-26 14:47:00
0-1367212		1367212	A-Felicia	2019-11-26 17:47:00	Location	Good	Valid	N/A	1	-70.0231	41.7955	N/A		11	0	N	Low	2019-11-26 17:47:00
0-1367212		1367212	A-Felicia	2019-11-26 19:53:00	Location	Good	Valid	N/A	0	-70.0233	41.7955	N/A		11	0	N	Low	2019-11-26 19:53:00
