# Supplementary material for: Developing bottom drifters to better understand the stranding locations of cold-stunned sea turtles in Cape Cod Bay, Massachusetts
Source: PeerJ. 2023 Aug 30;11:e15866. doi: 10.7717/peerj.15866 (PMC10474834; doi:10.7717/peerj.15866)
Supplement: Supplemental Information 16 [file peerj-11-15866-s016.xlsx]

## Sheet: Sheet1
ESN	SeqNo	ESN	Unit Name	Message Time GMT	Message Subtype	Battery Condition	GPS Data	Missed Alarm	GPS Fail Counter	Longitude	Latitude	Message Trigger	Message Trigger State	Inputs 1-2	Alarms 1-2	Moving	GPS Fix Confidence	Message Time GMT
0-1367839		1367839	BCHIGH	2019-11-26 14:41:00	Turned On	Good	Valid	N/A	0	-71.5149	41.4651	N/A		11	0	N	High	2019-11-26 14:41:00
0-1367839		1367839	BCHIGH	2019-11-26 17:08:00	Location	Good	Valid	N/A	0	-70.2749	41.6874	N/A		11	0	N	High	2019-11-26 17:08:00
0-1367839		1367839	BCHIGH	2019-11-26 19:10:00	Location	Good	Valid	N/A	0	-70.1156	41.7535	N/A		11	0	N	High	2019-11-26 19:10:00
0-1367839		1367839	BCHIGH	2019-11-26 21:22:00	Location	Good	Valid	N/A	0	-70.1156	41.9221	N/A		11	0	N	High	2019-11-26 21:22:00
0-1367839		1367839	BCHIGH	2019-11-26 23:08:00	Location	Good	Valid	N/A	0	-70.0778	41.9728	N/A		11	0	N	High	2019-11-26 23:08:00
0-1367839		1367839	BCHIGH	2019-11-27 01:16:00	Location	Good	Valid	N/A	0	-70.0772	41.974	N/A		11	0	N	High	2019-11-27 01:16:00
0-1367839		1367839	BCHIGH	2019-11-27 11:15:00	Location	Good	Valid	N/A	0	-70.0769	41.9742	N/A		11	0	N	High	2019-11-27 11:15:00
0-1367839		1367839	BCHIGH	2019-11-27 13:10:00	Location	Good	Valid	N/A	0	-70.0769	41.9742	N/A		11	0	N	High	2019-11-27 13:10:00
0-1367839		1367839	BCHIGH	2019-11-27 13:51:00	Location	Good	Valid	N/A	0	-70.0769	41.9742	N/A		11	0	N	High	2019-11-27 13:51:00
0-1367839		1367839	BCHIGH	2019-11-27 14:54:00	Location	Good	Valid	N/A	0	-70.0769	41.9742	N/A		11	0	N	High	2019-11-27 14:54:00
