# Supplementary material for: Developing bottom drifters to better understand the stranding locations of cold-stunned sea turtles in Cape Cod Bay, Massachusetts
Source: PeerJ. 2023 Aug 30;11:e15866. doi: 10.7717/peerj.15866 (PMC10474834; doi:10.7717/peerj.15866)
Supplement: Supplemental Information 18 [file peerj-11-15866-s018.xlsx]

## Sheet: Sheet1
ESN	SeqNo	ESN	Unit Name	Message Time GMT	Message Subtype	Battery Condition	GPS Data	Missed Alarm	GPS Fail Counter	Longitude	Latitude	Message Trigger	Message Trigger State	Inputs 1-2	Alarms 1-2	Moving	GPS Fix Confidence	Message Time GMT
0-3329687		3329687	GOMI	2019-11-26 15:26:00	Turned On	Good	Valid	N/A	0	-71.5149	41.4649	N/A		11	0	N	High	2019-11-26 15:26:00
0-3329687		3329687	GOMI	2019-11-26 16:35:00	Location	Good	Valid	N/A	0	-70.9631	41.6535	N/A		11	0	N	High	2019-11-26 16:35:00
0-3329687		3329687	GOMI	2019-11-26 17:36:00	Location	Good	Valid	N/A	0	-70.0264	41.7306	N/A		11	0	N	High	2019-11-26 17:36:00
0-3329687		3329687	GOMI	2019-11-26 19:24:00	Location	Good	Valid	N/A	0	-70.1543	41.7525	N/A		11	0	N	High	2019-11-26 19:24:00
0-3329687		3329687	GOMI	2019-11-26 20:31:00	Location	Good	Valid	N/A	0	-70.1389	41.8853	N/A		11	0	N	High	2019-11-26 20:31:00
0-3329687		3329687	GOMI	2019-11-26 21:36:00	Location	Good	Valid	N/A	0	-70.1344	41.9048	N/A		11	0	N	High	2019-11-26 21:36:00
0-3329687		3329687	GOMI	2019-11-26 22:34:00	Location	Good	Valid	N/A	0	-70.1309	41.9068	N/A		11	0	N	High	2019-11-26 22:34:00
0-3329687		3329687	GOMI	2019-11-26 23:35:00	Location	Good	Valid	N/A	0	-70.125	41.9051	N/A		11	0	N	High	2019-11-26 23:35:00
0-3329687		3329687	GOMI	2019-11-27 00:39:00	Location	Good	Valid	N/A	0	-70.1185	41.9015	N/A		11	0	N	High	2019-11-27 00:39:00
0-3329687		3329687	GOMI	2019-11-27 01:35:00	Location	Good	Valid	N/A	0	-70.1126	41.8976	N/A		11	0	N	High	2019-11-27 01:35:00
0-3329687		3329687	GOMI	2019-11-27 02:38:00	Location	Good	Valid	N/A	0	-70.1071	41.8935	N/A		11	0	N	High	2019-11-27 02:38:00
0-3329687		3329687	GOMI	2019-11-27 03:40:00	Location	Good	Valid	N/A	0	-70.1021	41.8907	N/A		11	0	N	High	2019-11-27 03:40:00
0-3329687		3329687	GOMI	2019-11-27 04:42:00	Location	Good	Valid	N/A	0	-70.1051	41.8962	N/A		11	0	N	High	2019-11-27 04:42:00
0-3329687		3329687	GOMI	2019-11-27 05:35:00	Location	Good	Valid	N/A	0	-70.1086	41.9047	N/A		11	0	N	High	2019-11-27 05:35:00
0-3329687		3329687	GOMI	2019-11-27 06:36:00	Location	Good	Valid	N/A	0	-70.1121	41.9156	N/A		11	0	N	High	2019-11-27 06:36:00
0-3329687		3329687	GOMI	2019-11-27 07:47:00	Location	Good	Valid	N/A	0	-70.1156	41.9277	N/A		11	0	N	High	2019-11-27 07:47:00
0-3329687		3329687	GOMI	2019-11-27 08:31:00	Location	Good	Valid	N/A	0	-70.1177	41.9372	N/A		11	0	N	High	2019-11-27 08:31:00
0-3329687		3329687	GOMI	2019-11-27 09:27:00	Location	Good	Valid	N/A	0	-70.1186	41.9467	N/A		11	0	N	High	2019-11-27 09:27:00
0-3329687		3329687	GOMI	2019-11-27 10:36:00	Location	Good	Valid	N/A	0	-70.1161	41.9546	N/A		11	0	N	High	2019-11-27 10:36:00
0-3329687		3329687	GOMI	2019-11-27 11:27:00	Location	Good	Valid	N/A	0	-70.1127	41.9572	N/A		11	0	N	High	2019-11-27 11:27:00
0-3329687		3329687	GOMI	2019-11-27 12:32:00	Location	Good	Valid	N/A	0	-70.1087	41.9589	N/A		11	0	N	High	2019-11-27 12:32:00
0-3329687		3329687	GOMI	2019-11-27 13:27:00	Location	Good	Valid	N/A	0	-70.1057	41.959	N/A		11	0	N	High	2019-11-27 13:27:00
0-3329687		3329687	GOMI	2019-11-27 14:35:00	Location	Good	Valid	N/A	0	-70.1022	41.9582	N/A		11	0	N	High	2019-11-27 14:35:00
0-3329687		3329687	GOMI	2019-11-27 15:35:00	Location	Good	Valid	N/A	0	-70.1005	41.9574	N/A		11	0	N	High	2019-11-27 15:35:00
0-3329687		3329687	GOMI	2019-11-27 16:29:00	Location	Good	Valid	N/A	0	-70.1013	41.9585	N/A		11	0	N	High	2019-11-27 16:29:00
0-3329687		3329687	GOMI	2019-11-27 17:22:00	Location	Good	Valid	N/A	0	-70.1036	41.9613	N/A		11	0	N	High	2019-11-27 17:22:00
0-3329687		3329687	GOMI	2019-11-27 18:19:00	Location	Good	Valid	N/A	0	-70.1068	41.9651	N/A		11	0	N	High	2019-11-27 18:19:00
0-3329687		3329687	GOMI	2019-11-27 19:14:00	Location	Good	Valid	N/A	0	-70.1106	41.9691	N/A		11	0	N	High	2019-11-27 19:14:00
0-3329687		3329687	GOMI	2019-11-27 20:12:00	Location	Good	Valid	N/A	0	-70.1149	41.9741	N/A		11	0	N	High	2019-11-27 20:12:00
0-3329687		3329687	GOMI	2019-11-27 21:14:00	Location	Good	Valid	N/A	0	-70.1203	41.9794	N/A		11	0	N	High	2019-11-27 21:14:00
0-3329687		3329687	GOMI	2019-11-27 22:13:00	Location	Good	Valid	N/A	0	-70.1238	41.9839	N/A		11	0	N	High	2019-11-27 22:13:00
0-3329687		3329687	GOMI	2019-11-27 23:10:00	Location	Good	Valid	N/A	0	-70.1244	41.9871	N/A		11	0	N	High	2019-11-27 23:10:00
0-3329687		3329687	GOMI	2019-11-28 00:08:00	Location	Good	Valid	N/A	0	-70.1225	41.9895	N/A		11	0	N	High	2019-11-28 00:08:00
0-3329687		3329687	GOMI	2019-11-28 01:15:00	Location	Good	Valid	N/A	0	-70.1182	41.9924	N/A		11	0	N	High	2019-11-28 01:15:00
0-3329687		3329687	GOMI	2019-11-28 02:16:00	Location	Good	Valid	N/A	0	-70.1135	41.995	N/A		11	0	N	High	2019-11-28 02:16:00
0-3329687		3329687	GOMI	2019-11-28 03:02:00	Location	Good	Valid	N/A	0	-70.1087	41.9966	N/A		11	0	N	High	2019-11-28 03:02:00
0-3329687		3329687	GOMI	2019-11-28 04:09:00	Location	Good	Valid	N/A	0	-70.1042	41.9989	N/A		11	0	N	High	2019-11-28 04:09:00
0-3329687		3329687	GOMI	2019-11-28 05:09:00	Location	Good	Valid	N/A	0	-70.1029	42.003	N/A		11	0	N	High	2019-11-28 05:09:00
0-3329687		3329687	GOMI	2019-11-28 06:02:00	Location	Good	Valid	N/A	0	-70.1024	42.0071	N/A		11	0	N	High	2019-11-28 06:02:00
0-3329687		3329687	GOMI	2019-11-28 07:08:00	Location	Good	Valid	N/A	0	-70.1012	42.0115	N/A		11	0	N	High	2019-11-28 07:08:00
0-3329687		3329687	GOMI	2019-11-28 08:01:00	Location	Good	Valid	N/A	0	-70.1005	42.0138	N/A		11	0	N	High	2019-11-28 08:01:00
0-3329687		3329687	GOMI	2019-11-28 09:19:00	Location	Good	Valid	N/A	0	-70.0999	42.0151	N/A		11	0	N	High	2019-11-28 09:19:00
0-3329687		3329687	GOMI	2019-11-28 10:11:00	Location	Good	Valid	N/A	0	-70.0987	42.0133	N/A		11	0	N	High	2019-11-28 10:11:00
0-3329687		3329687	GOMI	2019-11-28 11:13:00	Location	Good	Valid	N/A	0	-70.0969	42.008	N/A		11	0	N	High	2019-11-28 11:13:00
0-3329687		3329687	GOMI	2019-11-28 12:22:00	Location	Good	Valid	N/A	0	-70.0917	42.0004	N/A		11	0	N	High	2019-11-28 12:22:00
0-3329687		3329687	GOMI	2019-11-28 13:12:00	Location	Good	Valid	N/A	0	-70.0872	41.9939	N/A		11	0	N	High	2019-11-28 13:12:00
0-3329687		3329687	GOMI	2019-11-28 14:19:00	Location	Good	Valid	N/A	0	-70.0821	41.9832	N/A		11	0	N	High	2019-11-28 14:19:00
0-3329687		3329687	GOMI	2019-11-28 15:10:00	Location	Good	Valid	N/A	0	-70.0805	41.9735	N/A		11	0	N	High	2019-11-28 15:10:00
0-3329687		3329687	GOMI	2019-11-28 16:06:00	Location	Good	Valid	N/A	0	-70.0797	41.9624	N/A		11	0	N	High	2019-11-28 16:06:00
0-3329687		3329687	GOMI	2019-11-28 17:06:00	Location	Good	Valid	N/A	0	-70.0785	41.9509	N/A		11	0	N	High	2019-11-28 17:06:00
0-3329687		3329687	GOMI	2019-11-28 18:00:00	Location	Good	Valid	N/A	0	-70.077	41.9389	N/A		11	0	N	High	2019-11-28 18:00:00
0-3329687		3329687	GOMI	2019-11-28 19:02:00	Location	Good	Valid	N/A	0	-70.0748	41.9249	N/A		11	0	N	High	2019-11-28 19:02:00
0-3329687		3329687	GOMI	2019-11-28 20:06:00	Location	Good	Valid	N/A	0	-70.0725	41.909	N/A		11	0	N	High	2019-11-28 20:06:00
0-3329687		3329687	GOMI	2019-11-28 21:02:00	Location	Good	Valid	N/A	0	-70.0719	41.9032	N/A		11	0	N	High	2019-11-28 21:02:00
0-3329687		3329687	GOMI	2019-11-28 22:16:00	Location	Good	Valid	N/A	0	-70.0717	41.9028	N/A		11	0	N	High	2019-11-28 22:16:00
0-3329687		3329687	GOMI	2019-11-29 01:13:00	Location	Good	Valid	N/A	0	-70.0717	41.9028	N/A		11	0	N	High	2019-11-29 01:13:00
0-3329687		3329687	GOMI	2019-11-29 06:43:00	Location	Good	Valid	N/A	0	-70.0713	41.9024	N/A		11	0	N	High	2019-11-29 06:43:00
0-3329687		3329687	GOMI	2019-11-29 13:47:00	Location	Good	Valid	N/A	0	-70.0713	41.9024	N/A		11	0	N	High	2019-11-29 13:47:00
0-3329687		3329687	GOMI	2019-11-29 18:54:00	Location	Good	Valid	N/A	0	-70.0713	41.9024	N/A		11	0	N	High	2019-11-29 18:54:00
0-3329687		3329687	GOMI	2019-11-29 19:50:00	Location	Good	Valid	N/A	0	-70.0713	41.9024	N/A		11	0	N	High	2019-11-29 19:50:00
0-3329687		3329687	GOMI	2019-11-29 20:56:00	Location	Good	Valid	N/A	0	-70.0714	41.9024	N/A		11	0	N	High	2019-11-29 20:56:00
0-3329687		3329687	GOMI	2019-11-29 21:51:00	Location	Good	Valid	N/A	0	-70.0713	41.9024	N/A		11	0	N	High	2019-11-29 21:51:00
0-3329687		3329687	GOMI	2019-11-29 22:56:00	Location	Good	Valid	N/A	0	-70.0713	41.9024	N/A		11	0	N	High	2019-11-29 22:56:00
0-3329687		3329687	GOMI	2019-11-29 23:51:00	Location	Good	Valid	N/A	0	-70.0713	41.9024	N/A		11	0	N	High	2019-11-29 23:51:00
0-3329687		3329687	GOMI	2019-11-30 00:43:00	Location	Good	Valid	N/A	0	-70.0713	41.9024	N/A		11	0	N	High	2019-11-30 00:43:00
0-3329687		3329687	GOMI	2019-11-30 01:42:00	Location	Good	Valid	N/A	0	-70.0713	41.9024	N/A		11	0	N	High	2019-11-30 01:42:00
0-3329687		3329687	GOMI	2019-11-30 02:46:00	Location	Good	Valid	N/A	0	-70.0713	41.9023	N/A		11	0	N	High	2019-11-30 02:46:00
0-3329687		3329687	GOMI	2019-11-30 03:40:00	Location	Good	Valid	N/A	0	-70.0713	41.9024	N/A		11	0	N	High	2019-11-30 03:40:00
0-3329687		3329687	GOMI	2019-11-30 04:46:00	Location	Good	Valid	N/A	0	-70.0713	41.9023	N/A		11	0	N	High	2019-11-30 04:46:00
0-3329687		3329687	GOMI	2019-11-30 05:46:00	Location	Good	Valid	N/A	0	-70.0713	41.9024	N/A		11	0	N	High	2019-11-30 05:46:00
0-3329687		3329687	GOMI	2019-11-30 06:48:00	Location	Good	Valid	N/A	0	-70.0713	41.9024	N/A		11	0	N	High	2019-11-30 06:48:00
0-3329687		3329687	GOMI	2019-11-30 07:53:00	Location	Good	Valid	N/A	0	-70.0713	41.9024	N/A		11	0	N	High	2019-11-30 07:53:00
0-3329687		3329687	GOMI	2019-11-30 09:11:00	Location	Good	Valid	N/A	0	-70.0713	41.9024	N/A		11	0	N	High	2019-11-30 09:11:00
0-3329687		3329687	GOMI	2019-11-30 10:10:00	Location	Good	Valid	N/A	0	-70.0713	41.9024	N/A		11	0	N	High	2019-11-30 10:10:00
0-3329687		3329687	GOMI	2019-11-30 11:07:00	Location	Good	Valid	N/A	0	-70.0713	41.9024	N/A		11	0	N	High	2019-11-30 11:07:00
0-3329687		3329687	GOMI	2019-11-30 12:22:00	Location	Good	Valid	N/A	0	-70.0713	41.9024	N/A		11	0	N	High	2019-11-30 12:22:00
0-3329687		3329687	GOMI	2019-11-30 13:05:00	Location	Good	Valid	N/A	0	-70.0713	41.9023	N/A		11	0	N	High	2019-11-30 13:05:00
0-3329687		3329687	GOMI	2019-11-30 14:16:00	Location	Good	Valid	N/A	0	-70.0713	41.9024	N/A		11	0	N	High	2019-11-30 14:16:00
0-3329687		3329687	GOMI	2019-11-30 15:24:00	Location	Good	Valid	N/A	0	-70.0713	41.9024	N/A		11	0	N	High	2019-11-30 15:24:00
0-3329687		3329687	GOMI	2019-11-30 16:26:00	Location	Good	Valid	N/A	0	-70.0713	41.9023	N/A		11	0	N	High	2019-11-30 16:26:00
0-3329687		3329687	GOMI	2019-11-30 17:28:00	Location	Good	Valid	N/A	0	-70.0713	41.9024	N/A		11	0	N	High	2019-11-30 17:28:00
0-3329687		3329687	GOMI	2019-11-30 18:20:00	Location	Good	Valid	N/A	0	-70.0713	41.9024	N/A		11	0	N	High	2019-11-30 18:20:00
0-3329687		3329687	GOMI	2019-11-30 19:29:00	Location	Good	Valid	N/A	0	-70.0713	41.9024	N/A		11	0	N	High	2019-11-30 19:29:00
0-3329687		3329687	GOMI	2019-11-30 20:38:00	Location	Good	Valid	N/A	0	-70.0713	41.9024	N/A		11	0	N	High	2019-11-30 20:38:00
0-3329687		3329687	GOMI	2019-11-30 21:43:00	Location	Good	Valid	N/A	0	-70.0714	41.9023	N/A		11	0	N	High	2019-11-30 21:43:00
0-3329687		3329687	GOMI	2019-11-30 22:34:00	Location	Good	Valid	N/A	0	-70.0713	41.9024	N/A		11	0	N	High	2019-11-30 22:34:00
0-3329687		3329687	GOMI	2019-11-30 23:42:00	Location	Good	Valid	N/A	0	-70.0714	41.9024	N/A		11	0	N	High	2019-11-30 23:42:00
0-3329687		3329687	GOMI	2019-12-01 00:34:00	Location	Good	Valid	N/A	0	-70.0713	41.9024	N/A		11	0	N	High	2019-12-01 00:34:00
0-3329687		3329687	GOMI	2019-12-01 01:27:00	Location	Good	Valid	N/A	0	-70.0713	41.9024	N/A		11	0	N	High	2019-12-01 01:27:00
0-3329687		3329687	GOMI	2019-12-01 02:36:00	Location	Good	Valid	N/A	0	-70.0713	41.9024	N/A		11	0	N	High	2019-12-01 02:36:00
0-3329687		3329687	GOMI	2019-12-01 03:44:00	Location	Good	Valid	N/A	0	-70.0713	41.9024	N/A		11	0	N	High	2019-12-01 03:44:00
0-3329687		3329687	GOMI	2019-12-01 04:35:00	Location	Good	Valid	N/A	0	-70.0713	41.9024	N/A		11	0	N	High	2019-12-01 04:35:00
0-3329687		3329687	GOMI	2019-12-01 05:41:00	Location	Good	Valid	N/A	0	-70.0713	41.9024	N/A		11	0	N	High	2019-12-01 05:41:00
0-3329687		3329687	GOMI	2019-12-01 06:40:00	Location	Good	Valid	N/A	0	-70.0713	41.9024	N/A		11	0	N	High	2019-12-01 06:40:00
0-3329687		3329687	GOMI	2019-12-01 07:31:00	Location	Good	Valid	N/A	0	-70.0713	41.9024	N/A		11	0	N	High	2019-12-01 07:31:00
0-3329687		3329687	GOMI	2019-12-01 08:38:00	Location	Good	Valid	N/A	0	-70.0713	41.9023	N/A		11	0	N	High	2019-12-01 08:38:00
0-3329687		3329687	GOMI	2019-12-01 09:47:00	Location	Good	Valid	N/A	0	-70.0713	41.9023	N/A		11	0	N	High	2019-12-01 09:47:00
0-3329687		3329687	GOMI	2019-12-01 10:47:00	Location	Good	Valid	N/A	0	-70.0713	41.9024	N/A		11	0	N	High	2019-12-01 10:47:00
0-3329687		3329687	GOMI	2019-12-01 11:38:00	Location	Good	Valid	N/A	0	-70.0713	41.9024	N/A		11	0	N	High	2019-12-01 11:38:00
0-3329687		3329687	GOMI	2019-12-01 12:32:00	Location	Good	Valid	N/A	0	-70.0713	41.9023	N/A		11	0	N	High	2019-12-01 12:32:00
0-3329687		3329687	GOMI	2019-12-01 13:22:00	Location	Good	Valid	N/A	0	-70.0713	41.9024	N/A		11	0	N	High	2019-12-01 13:22:00
0-3329687		3329687	GOMI	2019-12-01 14:31:00	Location	Good	Valid	N/A	0	-70.0713	41.9024	N/A		11	0	N	High	2019-12-01 14:31:00
0-3329687		3329687	GOMI	2019-12-01 15:27:00	Location	Good	Valid	N/A	0	-70.0713	41.9024	N/A		11	0	N	High	2019-12-01 15:27:00
0-3329687		3329687	GOMI	2019-12-01 16:32:00	Location	Good	Valid	N/A	0	-70.0713	41.9024	N/A		11	0	N	High	2019-12-01 16:32:00
0-3329687		3329687	GOMI	2019-12-01 17:39:00	Location	Good	Valid	N/A	0	-70.0713	41.9024	N/A		11	0	N	High	2019-12-01 17:39:00
0-3329687		3329687	GOMI	2019-12-01 18:35:00	Location	Good	Valid	N/A	0	-70.0713	41.9024	N/A		11	0	N	Low	2019-12-01 18:35:00
0-3329687		3329687	GOMI	2019-12-01 19:34:00	Location	Good	Valid	N/A	0	-70.0713	41.9024	N/A		11	0	N	High	2019-12-01 19:34:00
0-3329687		3329687	GOMI	2019-12-01 20:41:00	Location	Good	Valid	N/A	0	-70.0713	41.9024	N/A		11	0	N	High	2019-12-01 20:41:00
0-3329687		3329687	GOMI	2019-12-01 21:32:00	Location	Good	Valid	N/A	0	-70.0713	41.9024	N/A		11	0	N	High	2019-12-01 21:32:00
0-3329687		3329687	GOMI	2019-12-01 22:31:00	Location	Good	Valid	N/A	0	-70.0713	41.9024	N/A		11	0	N	High	2019-12-01 22:31:00
0-3329687		3329687	GOMI	2019-12-01 23:21:00	Location	Good	Valid	N/A	0	-70.0713	41.9023	N/A		11	0	N	High	2019-12-01 23:21:00
0-3329687		3329687	GOMI	2019-12-02 00:23:00	Location	Good	Valid	N/A	0	-70.0713	41.9024	N/A		11	0	N	High	2019-12-02 00:23:00
0-3329687		3329687	GOMI	2019-12-02 01:13:00	Location	Good	Valid	N/A	0	-70.0713	41.9024	N/A		11	0	N	High	2019-12-02 01:13:00
0-3329687		3329687	GOMI	2019-12-02 02:09:00	Location	Good	Valid	N/A	0	-70.0713	41.9024	N/A		11	0	N	High	2019-12-02 02:09:00
0-3329687		3329687	GOMI	2019-12-02 03:10:00	Location	Good	Valid	N/A	0	-70.0713	41.9024	N/A		11	0	N	High	2019-12-02 03:10:00
0-3329687		3329687	GOMI	2019-12-02 04:10:00	Location	Good	Valid	N/A	0	-70.0713	41.9024	N/A		11	0	N	High	2019-12-02 04:10:00
0-3329687		3329687	GOMI	2019-12-02 05:02:00	Location	Good	Valid	N/A	0	-70.0713	41.9023	N/A		11	0	N	High	2019-12-02 05:02:00
0-3329687		3329687	GOMI	2019-12-02 05:57:00	Location	Good	Valid	N/A	0	-70.0713	41.9024	N/A		11	0	N	High	2019-12-02 05:57:00
0-3329687		3329687	GOMI	2019-12-02 06:52:00	Location	Good	Valid	N/A	0	-70.0713	41.9024	N/A		11	0	N	High	2019-12-02 06:52:00
0-3329687		3329687	GOMI	2019-12-02 07:50:00	Location	Good	Valid	N/A	0	-70.0713	41.9024	N/A		11	0	N	High	2019-12-02 07:50:00
0-3329687		3329687	GOMI	2019-12-02 08:44:00	Location	Good	Valid	N/A	0	-70.0713	41.9024	N/A		11	0	N	High	2019-12-02 08:44:00
0-3329687		3329687	GOMI	2019-12-02 09:40:00	Location	Good	Valid	N/A	0	-70.0713	41.9024	N/A		11	0	N	High	2019-12-02 09:40:00
0-3329687		3329687	GOMI	2019-12-02 10:34:00	Location	Good	Valid	N/A	0	-70.0713	41.9024	N/A		11	0	N	High	2019-12-02 10:34:00
0-3329687		3329687	GOMI	2019-12-02 11:37:00	Location	Good	Valid	N/A	0	-70.0713	41.9023	N/A		11	0	N	High	2019-12-02 11:37:00
0-3329687		3329687	GOMI	2019-12-02 12:38:00	Location	Good	Valid	N/A	0	-70.0713	41.9024	N/A		11	0	N	Low	2019-12-02 12:38:00
0-3329687		3329687	GOMI	2019-12-02 13:47:00	Location	Good	Valid	N/A	0	-70.0713	41.9023	N/A		11	0	N	High	2019-12-02 13:47:00
0-3329687		3329687	GOMI	2019-12-02 14:41:00	Location	Good	Valid	N/A	0	-70.0713	41.9023	N/A		11	0	N	High	2019-12-02 14:41:00
0-3329687		3329687	GOMI	2019-12-02 15:35:00	Location	Good	Valid	N/A	0	-70.0713	41.9024	N/A		11	0	N	High	2019-12-02 15:35:00
0-3329687		3329687	GOMI	2019-12-02 16:30:00	Location	Good	Valid	N/A	0	-70.0713	41.9024	N/A		11	0	N	High	2019-12-02 16:30:00
0-3329687		3329687	GOMI	2019-12-02 17:27:00	Location	Good	Valid	N/A	0	-70.0713	41.9024	N/A		11	0	N	High	2019-12-02 17:27:00
0-3329687		3329687	GOMI	2019-12-02 18:34:00	Location	Good	Valid	N/A	0	-70.0714	41.9023	N/A		11	0	N	High	2019-12-02 18:34:00
0-3329687		3329687	GOMI	2019-12-02 20:40:00	Location	Good	Valid	N/A	0	-70.0713	41.9023	N/A		11	0	N	High	2019-12-02 20:40:00
0-3329687		3329687	GOMI	2019-12-02 23:36:00	Location	Good	Valid	N/A	0	-70.0713	41.9023	N/A		11	0	N	High	2019-12-02 23:36:00
0-3329687		3329687	GOMI	2019-12-03 02:25:00	Location	Good	Valid	N/A	0	-70.0713	41.9023	N/A		11	0	N	High	2019-12-03 02:25:00
0-3329687		3329687	GOMI	2019-12-03 03:38:00	Location	Good	Valid	N/A	0	-70.0713	41.9024	N/A		11	0	N	High	2019-12-03 03:38:00
0-3329687		3329687	GOMI	2019-12-03 05:09:00	Location	Good	Valid	N/A	0	-70.0713	41.9024	N/A		11	0	N	High	2019-12-03 05:09:00
0-3329687		3329687	GOMI	2019-12-03 06:29:00	Location	Good	Valid	N/A	0	-70.0714	41.9024	N/A		11	0	N	High	2019-12-03 06:29:00
0-3329687		3329687	GOMI	2019-12-03 09:23:00	Location	Good	Valid	N/A	0	-70.0713	41.9023	N/A		11	0	N	High	2019-12-03 09:23:00
0-3329687		3329687	GOMI	2019-12-03 12:22:00	Location	Good	Valid	N/A	0	-70.0715	41.902	N/A		11	0	N	High	2019-12-03 12:22:00
0-3329687		3329687	GOMI	2019-12-03 16:29:00	Location	Good	Valid	N/A	0	-70.0712	41.9023	N/A		11	0	N	High	2019-12-03 16:29:00
0-3329687		3329687	GOMI	2019-12-03 22:56:00	Location	Good	Valid	N/A	0	-70.0713	41.9024	N/A		11	0	N	High	2019-12-03 22:56:00
0-3329687		3329687	GOMI	2019-12-04 01:57:00	Location	Good	Valid	N/A	0	-70.0713	41.9023	N/A		11	0	N	High	2019-12-04 01:57:00
0-3329687		3329687	GOMI	2019-12-04 09:14:00	Location	Good	Valid	N/A	0	-70.0713	41.9024	N/A		11	0	N	High	2019-12-04 09:14:00
0-3329687		3329687	GOMI	2019-12-04 10:59:00	Location	Good	Valid	N/A	0	-70.0713	41.9024	N/A		11	0	N	High	2019-12-04 10:59:00
0-3329687		3329687	GOMI	2019-12-04 14:36:00	Location	Good	Valid	N/A	0	-70.0713	41.9024	N/A		11	0	N	High	2019-12-04 14:36:00
0-3329687		3329687	GOMI	2019-12-05 09:19:00	Location	Good	Valid	N/A	0	-70.0713	41.9024	N/A		11	0	N	High	2019-12-05 09:19:00
0-3329687		3329687	GOMI	2019-12-05 15:19:00	Location	Good	Valid	N/A	0	-70.0713	41.9023	N/A		11	0	N	High	2019-12-05 15:19:00
0-3329687		3329687	GOMI	2019-12-06 05:19:00	Location	Good	Valid	N/A	0	-70.0713	41.9024	N/A		11	0	N	Low	2019-12-06 05:19:00
0-3329687		3329687	GOMI	2019-12-06 08:19:00	Location	Good	Valid	N/A	0	-70.0713	41.9023	N/A		11	0	N	High	2019-12-06 08:19:00
0-3329687		3329687	GOMI	2019-12-06 11:13:00	Location	Good	Valid	N/A	0	-70.0713	41.9024	N/A		11	0	N	High	2019-12-06 11:13:00
0-3329687		3329687	GOMI	2019-12-06 15:07:00	Location	Good	Valid	N/A	0	-70.0713	41.9023	N/A		11	0	N	High	2019-12-06 15:07:00
0-3329687		3329687	GOMI	2019-12-07 02:08:00	Location	Good	Valid	N/A	0	-70.0713	41.9024	N/A		11	0	N	High	2019-12-07 02:08:00
0-3329687		3329687	GOMI	2019-12-07 08:36:00	Location	Good	Valid	N/A	0	-70.0713	41.9023	N/A		11	0	N	High	2019-12-07 08:36:00
0-3329687		3329687	GOMI	2019-12-07 14:32:00	Location	Good	Valid	N/A	0	-70.0714	41.9024	N/A		11	0	N	High	2019-12-07 14:32:00
0-3329687		3329687	GOMI	2019-12-07 16:54:00	Location	Good	Valid	N/A	0	-70.0713	41.9023	N/A		11	0	N	High	2019-12-07 16:54:00
0-3329687		3329687	GOMI	2019-12-07 19:19:00	Location	Good	Valid	N/A	0	-70.0713	41.9023	N/A		11	0	N	High	2019-12-07 19:19:00
0-3329687		3329687	GOMI	2019-12-07 20:14:00	Location	Good	Valid	N/A	0	-70.0713	41.9023	N/A		11	0	N	High	2019-12-07 20:14:00
0-3329687		3329687	GOMI	2019-12-07 21:06:00	Location	Good	Valid	N/A	0	-70.0713	41.9023	N/A		11	0	N	High	2019-12-07 21:06:00
0-3329687		3329687	GOMI	2019-12-07 22:12:00	Location	Good	Valid	N/A	0	-70.0713	41.9023	N/A		11	0	N	High	2019-12-07 22:12:00
0-3329687		3329687	GOMI	2019-12-07 23:17:00	Location	Good	Valid	N/A	0	-70.0711	41.9022	N/A		11	0	N	High	2019-12-07 23:17:00
0-3329687		3329687	GOMI	2019-12-08 00:20:00	Location	Good	Valid	N/A	0	-70.0713	41.9023	N/A		11	0	N	High	2019-12-08 00:20:00
0-3329687		3329687	GOMI	2019-12-08 01:18:00	Location	Good	Valid	N/A	0	-70.0714	41.9023	N/A		11	0	N	High	2019-12-08 01:18:00
0-3329687		3329687	GOMI	2019-12-08 02:11:00	Location	Good	Valid	N/A	0	-70.0714	41.9025	N/A		11	0	N	High	2019-12-08 02:11:00
0-3329687		3329687	GOMI	2019-12-08 03:04:00	Location	Good	Valid	N/A	0	-70.0713	41.9024	N/A		11	0	N	High	2019-12-08 03:04:00
0-3329687		3329687	GOMI	2019-12-08 04:02:00	Location	Good	Valid	N/A	0	-70.0714	41.9024	N/A		11	0	N	High	2019-12-08 04:02:00
0-3329687		3329687	GOMI	2019-12-08 04:54:00	Location	Good	Valid	N/A	0	-70.0714	41.9024	N/A		11	0	N	High	2019-12-08 04:54:00
0-3329687		3329687	GOMI	2019-12-08 05:56:00	Location	Good	Valid	N/A	0	-70.0713	41.9023	N/A		11	0	N	High	2019-12-08 05:56:00
0-3329687		3329687	GOMI	2019-12-08 06:55:00	Location	Good	Valid	N/A	0	-70.0714	41.9024	N/A		11	0	N	High	2019-12-08 06:55:00
0-3329687		3329687	GOMI	2019-12-08 07:53:00	Location	Good	Valid	N/A	0	-70.0713	41.9024	N/A		11	0	N	High	2019-12-08 07:53:00
0-3329687		3329687	GOMI	2019-12-08 08:48:00	Location	Good	Valid	N/A	0	-70.0713	41.9024	N/A		11	0	N	High	2019-12-08 08:48:00
0-3329687		3329687	GOMI	2019-12-08 09:48:00	Location	Good	Valid	N/A	0	-70.0713	41.9024	N/A		11	0	N	High	2019-12-08 09:48:00
0-3329687		3329687	GOMI	2019-12-08 10:58:00	Location	Good	Valid	N/A	0	-70.0713	41.9024	N/A		11	0	N	High	2019-12-08 10:58:00
0-3329687		3329687	GOMI	2019-12-08 11:52:00	Location	Good	Valid	N/A	0	-70.0713	41.9024	N/A		11	0	N	High	2019-12-08 11:52:00
0-3329687		3329687	GOMI	2019-12-08 12:48:00	Location	Good	Valid	N/A	0	-70.0713	41.9023	N/A		11	0	N	High	2019-12-08 12:48:00
0-3329687		3329687	GOMI	2019-12-08 13:57:00	Location	Good	Valid	N/A	0	-70.0713	41.9024	N/A		11	0	N	High	2019-12-08 13:57:00
0-3329687		3329687	GOMI	2019-12-08 14:57:00	Location	Good	Valid	N/A	0	-70.0713	41.9023	N/A		11	0	N	High	2019-12-08 14:57:00
0-3329687		3329687	GOMI	2019-12-08 15:49:00	Location	Good	Valid	N/A	0	-70.0713	41.9024	N/A		11	0	N	High	2019-12-08 15:49:00
0-3329687		3329687	GOMI	2019-12-08 16:57:00	Location	Good	Valid	N/A	0	-70.0714	41.9029	N/A		11	0	N	High	2019-12-08 16:57:00
0-3329687		3329687	GOMI	2019-12-08 18:07:00	Location	Good	Valid	N/A	0	-70.0714	41.9029	N/A		11	0	N	High	2019-12-08 18:07:00
0-3329687		3329687	GOMI	2019-12-08 19:15:00	Location	Good	Valid	N/A	0	-70.0714	41.9029	N/A		11	0	N	High	2019-12-08 19:15:00
0-3329687		3329687	GOMI	2019-12-08 20:15:00	Location	Good	Valid	N/A	0	-70.0715	41.9029	N/A		11	0	N	High	2019-12-08 20:15:00
0-3329687		3329687	GOMI	2019-12-08 21:26:00	Location	Good	Valid	N/A	0	-70.0714	41.9029	N/A		11	0	N	High	2019-12-08 21:26:00
0-3329687		3329687	GOMI	2019-12-08 22:29:00	Location	Good	Valid	N/A	0	-70.0714	41.9029	N/A		11	0	N	High	2019-12-08 22:29:00
0-3329687		3329687	GOMI	2019-12-08 23:30:00	Location	Good	Valid	N/A	0	-70.0714	41.9029	N/A		11	0	N	High	2019-12-08 23:30:00
0-3329687		3329687	GOMI	2019-12-09 00:25:00	Location	Good	Valid	N/A	0	-70.0714	41.9029	N/A		11	0	N	High	2019-12-09 00:25:00
0-3329687		3329687	GOMI	2019-12-09 01:27:00	Location	Good	Valid	N/A	0	-70.0714	41.9029	N/A		11	0	N	High	2019-12-09 01:27:00
0-3329687		3329687	GOMI	2019-12-09 02:29:00	Location	Good	Valid	N/A	0	-70.0714	41.9029	N/A		11	0	N	High	2019-12-09 02:29:00
0-3329687		3329687	GOMI	2019-12-09 03:32:00	Location	Good	Valid	N/A	0	-70.0714	41.9029	N/A		11	0	N	High	2019-12-09 03:32:00
0-3329687		3329687	GOMI	2019-12-09 04:34:00	Location	Good	Valid	N/A	0	-70.0714	41.9029	N/A		11	0	N	High	2019-12-09 04:34:00
0-3329687		3329687	GOMI	2019-12-09 05:43:00	Location	Good	Valid	N/A	0	-70.0714	41.9029	N/A		11	0	N	High	2019-12-09 05:43:00
0-3329687		3329687	GOMI	2019-12-09 06:52:00	Location	Good	Valid	N/A	0	-70.0714	41.9029	N/A		11	0	N	High	2019-12-09 06:52:00
0-3329687		3329687	GOMI	2019-12-09 07:46:00	Location	Good	Valid	N/A	0	-70.0714	41.9029	N/A		11	0	N	High	2019-12-09 07:46:00
0-3329687		3329687	GOMI	2019-12-09 08:44:00	Location	Good	Valid	N/A	0	-70.0714	41.9029	N/A		11	0	N	High	2019-12-09 08:44:00
0-3329687		3329687	GOMI	2019-12-09 09:45:00	Location	Good	Valid	N/A	0	-70.0714	41.9029	N/A		11	0	N	High	2019-12-09 09:45:00
0-3329687		3329687	GOMI	2019-12-09 10:42:00	Location	Good	Valid	N/A	0	-70.0714	41.9029	N/A		11	0	N	High	2019-12-09 10:42:00
0-3329687		3329687	GOMI	2019-12-09 11:40:00	Location	Good	Valid	N/A	0	-70.0714	41.9029	N/A		11	0	N	High	2019-12-09 11:40:00
0-3329687		3329687	GOMI	2019-12-09 12:34:00	Location	Good	Valid	N/A	0	-70.0714	41.9029	N/A		11	0	N	High	2019-12-09 12:34:00
0-3329687		3329687	GOMI	2019-12-09 13:34:00	Location	Good	Valid	N/A	0	-70.0714	41.9028	N/A		11	0	N	High	2019-12-09 13:34:00
0-3329687		3329687	GOMI	2019-12-09 14:27:00	Location	Good	Valid	N/A	0	-70.0714	41.9029	N/A		11	0	N	High	2019-12-09 14:27:00
0-3329687		3329687	GOMI	2019-12-09 15:36:00	Location	Good	Valid	N/A	0	-70.0714	41.9029	N/A		11	0	N	High	2019-12-09 15:36:00
0-3329687		3329687	GOMI	2019-12-09 16:37:00	Location	Good	Valid	N/A	0	-70.0714	41.9029	N/A		11	0	N	High	2019-12-09 16:37:00
0-3329687		3329687	GOMI	2019-12-09 17:43:00	Location	Good	Valid	N/A	0	-70.0714	41.9029	N/A		11	0	N	High	2019-12-09 17:43:00
0-3329687		3329687	GOMI	2019-12-09 18:39:00	Location	Good	Valid	N/A	0	-70.0714	41.9029	N/A		11	0	N	High	2019-12-09 18:39:00
0-3329687		3329687	GOMI	2019-12-09 19:43:00	Location	Good	Valid	N/A	0	-70.0714	41.9029	N/A		11	0	N	High	2019-12-09 19:43:00
0-3329687		3329687	GOMI	2019-12-09 20:38:00	Location	Good	Valid	N/A	0	-70.0714	41.9029	N/A		11	0	N	High	2019-12-09 20:38:00
0-3329687		3329687	GOMI	2019-12-09 21:36:00	Location	Good	Valid	N/A	0	-70.0714	41.9029	N/A		11	0	N	High	2019-12-09 21:36:00
0-3329687		3329687	GOMI	2019-12-09 22:34:00	Location	Good	Valid	N/A	0	-70.0714	41.9029	N/A		11	0	N	High	2019-12-09 22:34:00
0-3329687		3329687	GOMI	2019-12-09 23:26:00	Location	Good	Valid	N/A	0	-70.0714	41.9029	N/A		11	0	N	High	2019-12-09 23:26:00
0-3329687		3329687	GOMI	2019-12-10 00:23:00	Location	Good	Valid	N/A	0	-70.0714	41.9029	N/A		11	0	N	High	2019-12-10 00:23:00
0-3329687		3329687	GOMI	2019-12-10 01:28:00	Location	Good	Valid	N/A	0	-70.0714	41.9029	N/A		11	0	N	High	2019-12-10 01:28:00
0-3329687		3329687	GOMI	2019-12-10 02:31:00	Location	Good	Valid	N/A	0	-70.0714	41.9029	N/A		11	0	N	High	2019-12-10 02:31:00
0-3329687		3329687	GOMI	2019-12-10 03:28:00	Location	Good	Valid	N/A	0	-70.0714	41.9029	N/A		11	0	N	High	2019-12-10 03:28:00
0-3329687		3329687	GOMI	2019-12-10 04:37:00	Location	Good	Valid	N/A	0	-70.0714	41.9029	N/A		11	0	N	High	2019-12-10 04:37:00
0-3329687		3329687	GOMI	2019-12-10 05:34:00	Location	Good	Valid	N/A	0	-70.0714	41.9029	N/A		11	0	N	High	2019-12-10 05:34:00
0-3329687		3329687	GOMI	2019-12-10 06:32:00	Location	Good	Valid	N/A	0	-70.0714	41.9029	N/A		11	0	N	High	2019-12-10 06:32:00
0-3329687		3329687	GOMI	2019-12-10 07:35:00	Location	Good	Valid	N/A	0	-70.0714	41.9029	N/A		11	0	N	High	2019-12-10 07:35:00
0-3329687		3329687	GOMI	2019-12-10 08:34:00	Location	Good	Valid	N/A	0	-70.0714	41.9029	N/A		11	0	N	High	2019-12-10 08:34:00
0-3329687		3329687	GOMI	2019-12-10 09:37:00	Location	Good	Valid	N/A	0	-70.0714	41.9029	N/A		11	0	N	High	2019-12-10 09:37:00
0-3329687		3329687	GOMI	2019-12-10 10:38:00	Location	Good	Valid	N/A	0	-70.0714	41.9029	N/A		11	0	N	High	2019-12-10 10:38:00
0-3329687		3329687	GOMI	2019-12-10 11:36:00	Location	Good	Valid	N/A	0	-70.0714	41.9029	N/A		11	0	N	High	2019-12-10 11:36:00
0-3329687		3329687	GOMI	2019-12-10 12:42:00	Location	Good	Valid	N/A	0	-70.0714	41.9029	N/A		11	0	N	High	2019-12-10 12:42:00
0-3329687		3329687	GOMI	2019-12-10 13:41:00	Location	Good	Valid	N/A	0	-70.0714	41.9029	N/A		11	0	N	High	2019-12-10 13:41:00
0-3329687		3329687	GOMI	2019-12-10 14:44:00	Location	Good	Valid	N/A	0	-70.0714	41.9029	N/A		11	0	N	High	2019-12-10 14:44:00
0-3329687		3329687	GOMI	2019-12-10 15:46:00	Location	Good	Valid	N/A	0	-70.0714	41.9029	N/A		11	0	N	High	2019-12-10 15:46:00
0-3329687		3329687	GOMI	2019-12-10 16:44:00	Location	Good	Valid	N/A	0	-70.0714	41.9029	N/A		11	0	N	High	2019-12-10 16:44:00
0-3329687		3329687	GOMI	2019-12-10 17:48:00	Location	Good	Valid	N/A	0	-70.0714	41.9029	N/A		11	0	N	High	2019-12-10 17:48:00
0-3329687		3329687	GOMI	2019-12-10 18:44:00	Location	Good	Valid	N/A	0	-70.0714	41.9029	N/A		11	0	N	High	2019-12-10 18:44:00
0-3329687		3329687	GOMI	2019-12-10 19:51:00	Location	Good	Valid	N/A	0	-70.0714	41.9029	N/A		11	0	N	High	2019-12-10 19:51:00
0-3329687		3329687	GOMI	2019-12-10 20:43:00	Location	Good	Valid	N/A	0	-70.0714	41.9029	N/A		11	0	N	High	2019-12-10 20:43:00
0-3329687		3329687	GOMI	2019-12-10 21:38:00	Location	Good	Valid	N/A	0	-70.0714	41.9029	N/A		11	0	N	High	2019-12-10 21:38:00
0-3329687		3329687	GOMI	2019-12-10 22:31:00	Location	Good	Valid	N/A	0	-70.0714	41.9029	N/A		11	0	N	High	2019-12-10 22:31:00
0-3329687		3329687	GOMI	2019-12-10 23:38:00	Location	Good	Valid	N/A	0	-70.0714	41.9029	N/A		11	0	N	High	2019-12-10 23:38:00
0-3329687		3329687	GOMI	2019-12-11 00:44:00	Location	Good	Valid	N/A	0	-70.0714	41.9029	N/A		11	0	N	High	2019-12-11 00:44:00
0-3329687		3329687	GOMI	2019-12-11 01:31:00	Location	Good	Valid	N/A	0	-70.0714	41.9029	N/A		11	0	N	High	2019-12-11 01:31:00
0-3329687		3329687	GOMI	2019-12-11 02:27:00	Location	Good	Valid	N/A	0	-70.0714	41.9029	N/A		11	0	N	High	2019-12-11 02:27:00
0-3329687		3329687	GOMI	2019-12-11 03:32:00	Location	Good	Valid	N/A	0	-70.0714	41.9029	N/A		11	0	N	High	2019-12-11 03:32:00
0-3329687		3329687	GOMI	2019-12-11 04:24:00	Location	Good	Valid	N/A	0	-70.0714	41.9029	N/A		11	0	N	High	2019-12-11 04:24:00
0-3329687		3329687	GOMI	2019-12-11 05:19:00	Location	Good	Valid	N/A	0	-70.0714	41.9029	N/A		11	0	N	High	2019-12-11 05:19:00
0-3329687		3329687	GOMI	2019-12-11 06:12:00	Location	Good	Valid	N/A	0	-70.0714	41.9029	N/A		11	0	N	High	2019-12-11 06:12:00
0-3329687		3329687	GOMI	2019-12-11 07:11:00	Location	Good	Valid	N/A	0	-70.0714	41.9029	N/A		11	0	N	High	2019-12-11 07:11:00
0-3329687		3329687	GOMI	2019-12-11 08:19:00	Location	Good	Valid	N/A	0	-70.0714	41.9029	N/A		11	0	N	High	2019-12-11 08:19:00
0-3329687		3329687	GOMI	2019-12-11 09:27:00	Location	Good	Valid	N/A	0	-70.0714	41.9029	N/A		11	0	N	High	2019-12-11 09:27:00
0-3329687		3329687	GOMI	2019-12-11 10:28:00	Location	Good	Valid	N/A	0	-70.0714	41.9029	N/A		11	0	N	High	2019-12-11 10:28:00
0-3329687		3329687	GOMI	2019-12-11 11:37:00	Location	Good	Valid	N/A	0	-70.0714	41.9029	N/A		11	0	N	High	2019-12-11 11:37:00
0-3329687		3329687	GOMI	2019-12-11 12:33:00	Location	Good	Valid	N/A	0	-70.0714	41.9029	N/A		11	0	N	High	2019-12-11 12:33:00
0-3329687		3329687	GOMI	2019-12-11 13:25:00	Location	Good	Valid	N/A	0	-70.0714	41.9029	N/A		11	0	N	High	2019-12-11 13:25:00
0-3329687		3329687	GOMI	2019-12-11 14:18:00	Location	Good	Valid	N/A	0	-70.0714	41.9029	N/A		11	0	N	High	2019-12-11 14:18:00
0-3329687		3329687	GOMI	2019-12-11 15:11:00	Location	Good	Valid	N/A	0	-70.0714	41.9029	N/A		11	0	N	High	2019-12-11 15:11:00
0-3329687		3329687	GOMI	2019-12-11 16:19:00	Location	Good	Valid	N/A	0	-70.0714	41.9029	N/A		11	0	N	High	2019-12-11 16:19:00
0-3329687		3329687	GOMI	2019-12-11 17:12:00	Location	Good	Valid	N/A	0	-70.0714	41.9029	N/A		11	0	N	High	2019-12-11 17:12:00
0-3329687		3329687	GOMI	2019-12-11 18:16:00	Location	Good	Valid	N/A	0	-70.0714	41.9029	N/A		11	0	N	High	2019-12-11 18:16:00
0-3329687		3329687	GOMI	2019-12-11 19:22:00	Location	Good	Valid	N/A	0	-70.0714	41.9029	N/A		11	0	N	High	2019-12-11 19:22:00
0-3329687		3329687	GOMI	2019-12-11 20:17:00	Location	Good	Valid	N/A	0	-70.0714	41.9029	N/A		11	0	N	High	2019-12-11 20:17:00
0-3329687		3329687	GOMI	2019-12-11 21:22:00	Location	Good	Valid	N/A	0	-70.0714	41.9029	N/A		11	0	N	High	2019-12-11 21:22:00
0-3329687		3329687	GOMI	2019-12-11 22:11:00	Location	Good	Valid	N/A	0	-70.0714	41.9029	N/A		11	0	N	High	2019-12-11 22:11:00
0-3329687		3329687	GOMI	2019-12-11 23:10:00	Location	Good	Valid	N/A	0	-70.0714	41.9029	N/A		11	0	N	High	2019-12-11 23:10:00
0-3329687		3329687	GOMI	2019-12-12 00:10:00	Location	Good	Valid	N/A	0	-70.0714	41.9029	N/A		11	0	N	High	2019-12-12 00:10:00
0-3329687		3329687	GOMI	2019-12-12 01:11:00	Location	Good	Valid	N/A	0	-70.0714	41.9029	N/A		11	0	N	High	2019-12-12 01:11:00
0-3329687		3329687	GOMI	2019-12-12 02:21:00	Location	Good	Valid	N/A	0	-70.0714	41.9029	N/A		11	0	N	High	2019-12-12 02:21:00
0-3329687		3329687	GOMI	2019-12-12 03:15:00	Location	Good	Valid	N/A	0	-70.0714	41.9029	N/A		11	0	N	High	2019-12-12 03:15:00
0-3329687		3329687	GOMI	2019-12-12 04:23:00	Location	Good	Valid	N/A	0	-70.0714	41.9029	N/A		11	0	N	High	2019-12-12 04:23:00
0-3329687		3329687	GOMI	2019-12-12 05:29:00	Location	Good	Valid	N/A	0	-70.0714	41.9029	N/A		11	0	N	High	2019-12-12 05:29:00
0-3329687		3329687	GOMI	2019-12-12 06:26:00	Location	Good	Valid	N/A	0	-70.0714	41.9029	N/A		11	0	N	High	2019-12-12 06:26:00
0-3329687		3329687	GOMI	2019-12-12 07:29:00	Location	Good	Valid	N/A	0	-70.0714	41.9029	N/A		11	0	N	High	2019-12-12 07:29:00
0-3329687		3329687	GOMI	2019-12-12 08:34:00	Location	Good	Valid	N/A	0	-70.0714	41.9029	N/A		11	0	N	High	2019-12-12 08:34:00
0-3329687		3329687	GOMI	2019-12-12 09:29:00	Location	Good	Valid	N/A	0	-70.0714	41.9029	N/A		11	0	N	High	2019-12-12 09:29:00
0-3329687		3329687	GOMI	2019-12-12 10:24:00	Location	Good	Valid	N/A	0	-70.0714	41.9029	N/A		11	0	N	High	2019-12-12 10:24:00
0-3329687		3329687	GOMI	2019-12-12 11:32:00	Location	Good	Valid	N/A	0	-70.0714	41.9029	N/A		11	0	N	High	2019-12-12 11:32:00
0-3329687		3329687	GOMI	2019-12-12 12:38:00	Location	Good	Valid	N/A	0	-70.0714	41.9029	N/A		11	0	N	High	2019-12-12 12:38:00
0-3329687		3329687	GOMI	2019-12-12 13:39:00	Location	Good	Valid	N/A	0	-70.0714	41.9029	N/A		11	0	N	High	2019-12-12 13:39:00
0-3329687		3329687	GOMI	2019-12-12 14:41:00	Location	Good	Valid	N/A	0	-70.0714	41.9029	N/A		11	0	N	High	2019-12-12 14:41:00
0-3329687		3329687	GOMI	2019-12-12 15:37:00	Location	Good	Valid	N/A	0	-70.0714	41.9029	N/A		11	0	N	High	2019-12-12 15:37:00
0-3329687		3329687	GOMI	2019-12-12 16:45:00	Location	Good	Valid	N/A	0	-70.0714	41.9029	N/A		11	0	N	High	2019-12-12 16:45:00
0-3329687		3329687	GOMI	2019-12-12 17:40:00	Location	Good	Valid	N/A	0	-70.0714	41.9029	N/A		11	0	N	High	2019-12-12 17:40:00
0-3329687		3329687	GOMI	2019-12-12 18:48:00	Location	Good	Valid	N/A	0	-70.0714	41.9029	N/A		11	0	N	High	2019-12-12 18:48:00
0-3329687		3329687	GOMI	2019-12-12 19:57:00	Location	Good	Valid	N/A	0	-70.0714	41.9029	N/A		11	0	N	High	2019-12-12 19:57:00
0-3329687		3329687	GOMI	2019-12-12 20:54:00	Location	Good	Valid	N/A	0	-70.0714	41.9029	N/A		11	0	N	High	2019-12-12 20:54:00
0-3329687		3329687	GOMI	2019-12-12 21:58:00	Location	Good	Valid	N/A	0	-70.0715	41.9028	N/A		11	0	N	High	2019-12-12 21:58:00
0-3329687		3329687	GOMI	2019-12-12 22:54:00	Location	Good	Valid	N/A	0	-70.0714	41.9029	N/A		11	0	N	High	2019-12-12 22:54:00
0-3329687		3329687	GOMI	2019-12-13	Location	Good	Valid	N/A	0	-70.0714	41.9029	N/A		11	0	N	High	2019-12-13
0-3329687		3329687	GOMI	2019-12-13 00:54:00	Location	Good	Valid	N/A	0	-70.0714	41.9029	N/A		11	0	N	High	2019-12-13 00:54:00
0-3329687		3329687	GOMI	2019-12-13 01:59:00	Location	Good	Valid	N/A	0	-70.0714	41.9029	N/A		11	0	N	High	2019-12-13 01:59:00
0-3329687		3329687	GOMI	2019-12-13 03:10:00	Location	Good	Valid	N/A	0	-70.0714	41.9029	N/A		11	0	N	High	2019-12-13 03:10:00
0-3329687		3329687	GOMI	2019-12-13 04:18:00	Location	Good	Valid	N/A	0	-70.0714	41.9029	N/A		11	0	N	High	2019-12-13 04:18:00
0-3329687		3329687	GOMI	2019-12-13 05:21:00	Location	Good	Valid	N/A	0	-70.0714	41.9029	N/A		11	0	N	High	2019-12-13 05:21:00
0-3329687		3329687	GOMI	2019-12-13 06:18:00	Location	Good	Valid	N/A	0	-70.0714	41.9029	N/A		11	0	N	High	2019-12-13 06:18:00
0-3329687		3329687	GOMI	2019-12-13 07:16:00	Location	Good	Valid	N/A	0	-70.0714	41.9029	N/A		11	0	N	High	2019-12-13 07:16:00
0-3329687		3329687	GOMI	2019-12-13 08:17:00	Location	Good	Valid	N/A	0	-70.0714	41.9029	N/A		11	0	N	High	2019-12-13 08:17:00
0-3329687		3329687	GOMI	2019-12-13 09:12:00	Location	Good	Valid	N/A	0	-70.0714	41.9029	N/A		11	0	N	High	2019-12-13 09:12:00
0-3329687		3329687	GOMI	2019-12-13 10:19:00	Location	Good	Valid	N/A	0	-70.0714	41.9029	N/A		11	0	N	High	2019-12-13 10:19:00
0-3329687		3329687	GOMI	2019-12-13 11:29:00	Location	Good	Valid	N/A	0	-70.0714	41.9029	N/A		11	0	N	High	2019-12-13 11:29:00
0-3329687		3329687	GOMI	2019-12-13 12:21:00	Location	Good	Valid	N/A	0	-70.0714	41.9029	N/A		11	0	N	High	2019-12-13 12:21:00
0-3329687		3329687	GOMI	2019-12-13 13:15:00	Location	Good	Valid	N/A	0	-70.0714	41.9029	N/A		11	0	N	High	2019-12-13 13:15:00
0-3329687		3329687	GOMI	2019-12-13 14:26:00	Location	Good	Valid	N/A	0	-70.0714	41.9029	N/A		11	0	N	High	2019-12-13 14:26:00
0-3329687		3329687	GOMI	2019-12-13 15:31:00	Location	Good	Valid	N/A	0	-70.0714	41.9029	N/A		11	0	N	High	2019-12-13 15:31:00
0-3329687		3329687	GOMI	2019-12-13 16:22:00	Location	Good	Valid	N/A	0	-70.0714	41.9029	N/A		11	0	N	High	2019-12-13 16:22:00
0-3329687		3329687	GOMI	2019-12-13 17:22:00	Location	Good	Valid	N/A	0	-70.0714	41.9029	N/A		11	0	N	High	2019-12-13 17:22:00
0-3329687		3329687	GOMI	2019-12-13 18:28:00	Location	Good	Valid	N/A	0	-70.0714	41.9029	N/A		11	0	N	High	2019-12-13 18:28:00
0-3329687		3329687	GOMI	2019-12-13 19:33:00	Location	Good	Valid	N/A	0	-70.0715	41.9049	N/A		11	0	N	High	2019-12-13 19:33:00
