# Supplementary material for: Developing bottom drifters to better understand the stranding locations of cold-stunned sea turtles in Cape Cod Bay, Massachusetts
Source: PeerJ. 2023 Aug 30;11:e15866. doi: 10.7717/peerj.15866 (PMC10474834; doi:10.7717/peerj.15866)
Supplement: Supplemental Information 19 [file peerj-11-15866-s019.xlsx]

## Sheet: Sheet1
ESN	SeqNo	ESN	Unit Name	Message Time GMT	Message Subtype	Battery Condition	GPS Data	Missed Alarm	GPS Fail Counter	Longitude	Latitude	Message Trigger	Message Trigger State	Inputs 1-2	Alarms 1-2	Moving	GPS Fix Confidence	Message Time GMT
0-1367074		1367074	A-Felicia	2019-11-26 14:42:00	Turned On	Good	Valid	N/A	0	-71.5148	41.4651	N/A		11	0	N	High	2019-11-26 14:42:00
0-1367074		1367074	A-Felicia	2019-11-26 15:48:00	Location	Good	Valid	N/A	0	-71.4265	41.5263	N/A		11	0	N	High	2019-11-26 15:48:00
0-1367074		1367074	A-Felicia	2019-11-26 17:02:00	Location	Good	Valid	N/A	0	-70.6381	41.7739	N/A		11	0	N	High	2019-11-26 17:02:00
0-1367074		1367074	A-Felicia	2019-11-26 17:42:00	Location	Good	Valid	N/A	0	-69.9949	41.8824	N/A		11	0	N	High	2019-11-26 17:42:00
0-1367074		1367074	A-Felicia	2019-11-26 18:30:00	Location	Good	Valid	N/A	0	-70.1157	41.7535	N/A		11	0	N	High	2019-11-26 18:30:00
0-1367074		1367074	A-Felicia	2019-11-26 19:45:00	Location	Good	Valid	N/A	0	-70.1556	41.7648	N/A		11	0	N	High	2019-11-26 19:45:00
0-1367074		1367074	A-Felicia	2019-11-26 20:51:00	Location	Good	Valid	N/A	0	-70.1357	41.8949	N/A		11	0	N	High	2019-11-26 20:51:00
0-1367074		1367074	A-Felicia	2019-11-26 21:31:00	Location	Good	Valid	N/A	0	-70.1335	41.9056	N/A		11	0	N	High	2019-11-26 21:31:00
0-1367074		1367074	A-Felicia	2019-11-26 22:34:00	Location	Good	Valid	N/A	0	-70.1291	41.9085	N/A		11	0	N	High	2019-11-26 22:34:00
0-1367074		1367074	A-Felicia	2019-11-26 23:38:00	Location	Good	Valid	N/A	0	-70.1224	41.9073	N/A		11	0	N	High	2019-11-26 23:38:00
0-1367074		1367074	A-Felicia	2019-11-27 00:43:00	Location	Good	Valid	N/A	0	-70.1154	41.9055	N/A		11	0	N	High	2019-11-27 00:43:00
0-1367074		1367074	A-Felicia	2019-11-27 01:36:00	Location	Good	Valid	N/A	0	-70.1085	41.9028	N/A		11	0	N	High	2019-11-27 01:36:00
0-1367074		1367074	A-Felicia	2019-11-27 02:37:00	Location	Good	Valid	N/A	0	-70.1011	41.8987	N/A		11	0	N	High	2019-11-27 02:37:00
0-1367074		1367074	A-Felicia	2019-11-27 03:44:00	Location	Good	Valid	N/A	0	-70.0967	41.8971	N/A		11	0	N	High	2019-11-27 03:44:00
0-1367074		1367074	A-Felicia	2019-11-27 04:41:00	Location	Good	Valid	N/A	0	-70.0975	41.9004	N/A		11	0	N	High	2019-11-27 04:41:00
0-1367074		1367074	A-Felicia	2019-11-27 05:43:00	Location	Good	Valid	N/A	0	-70.1004	41.9095	N/A		11	0	N	High	2019-11-27 05:43:00
0-1367074		1367074	A-Felicia	2019-11-27 06:37:00	Location	Good	Valid	N/A	0	-70.1024	41.9166	N/A		11	0	N	High	2019-11-27 06:37:00
0-1367074		1367074	A-Felicia	2019-11-27 07:36:00	Location	Good	Valid	N/A	0	-70.1046	41.924	N/A		11	0	N	High	2019-11-27 07:36:00
0-1367074		1367074	A-Felicia	2019-11-27 08:33:00	Location	Good	Valid	N/A	0	-70.1074	41.9312	N/A		11	0	N	High	2019-11-27 08:33:00
0-1367074		1367074	A-Felicia	2019-11-27 09:35:00	Location	Good	Valid	N/A	0	-70.1092	41.9372	N/A		11	0	N	High	2019-11-27 09:35:00
0-1367074		1367074	A-Felicia	2019-11-27 10:29:00	Location	Good	Valid	N/A	0	-70.1091	41.9402	N/A		11	0	N	High	2019-11-27 10:29:00
0-1367074		1367074	A-Felicia	2019-11-27 11:31:00	Location	Good	Valid	N/A	0	-70.1071	41.9408	N/A		11	0	N	High	2019-11-27 11:31:00
0-1367074		1367074	A-Felicia	2019-11-27 12:46:00	Location	Good	Valid	N/A	0	-70.1038	41.9391	N/A		11	0	N	High	2019-11-27 12:46:00
0-1367074		1367074	A-Felicia	2019-11-27 13:38:00	Location	Good	Valid	N/A	0	-70.1006	41.937	N/A		11	0	N	High	2019-11-27 13:38:00
0-1367074		1367074	A-Felicia	2019-11-27 14:37:00	Location	Good	Valid	N/A	0	-70.0977	41.9348	N/A		11	0	N	High	2019-11-27 14:37:00
0-1367074		1367074	A-Felicia	2019-11-27 15:41:00	Location	Good	Valid	N/A	0	-70.0969	41.9336	N/A		11	0	N	High	2019-11-27 15:41:00
0-1367074		1367074	A-Felicia	2019-11-27 16:39:00	Location	Good	Valid	N/A	0	-70.0991	41.9361	N/A		11	0	N	High	2019-11-27 16:39:00
0-1367074		1367074	A-Felicia	2019-11-27 17:43:00	Location	Good	Valid	N/A	0	-70.1036	41.9423	N/A		11	0	N	High	2019-11-27 17:43:00
0-1367074		1367074	A-Felicia	2019-11-27 18:45:00	Location	Good	Valid	N/A	0	-70.1084	41.9499	N/A		11	0	N	High	2019-11-27 18:45:00
0-1367074		1367074	A-Felicia	2019-11-27 19:46:00	Location	Good	Valid	N/A	0	-70.1134	41.9576	N/A		11	0	N	High	2019-11-27 19:46:00
0-1367074		1367074	A-Felicia	2019-11-27 20:33:00	Location	Good	Valid	N/A	0	-70.1179	41.9629	N/A		11	0	N	High	2019-11-27 20:33:00
0-1367074		1367074	A-Felicia	2019-11-27 21:38:00	Location	Good	Valid	N/A	0	-70.1226	41.9693	N/A		11	0	N	High	2019-11-27 21:38:00
0-1367074		1367074	A-Felicia	2019-11-27 22:34:00	Location	Good	Valid	N/A	0	-70.1253	41.9748	N/A		11	0	N	High	2019-11-27 22:34:00
0-1367074		1367074	A-Felicia	2019-11-27 23:48:00	Location	Good	Valid	N/A	0	-70.1251	41.9776	N/A		11	0	N	High	2019-11-27 23:48:00
0-1367074		1367074	A-Felicia	2019-11-28 00:52:00	Location	Good	Valid	N/A	0	-70.1231	41.9795	N/A		11	0	N	High	2019-11-28 00:52:00
0-1367074		1367074	A-Felicia	2019-11-28 01:46:00	Location	Good	Valid	N/A	0	-70.1184	41.9819	N/A		11	0	N	High	2019-11-28 01:46:00
0-1367074		1367074	A-Felicia	2019-11-28 02:38:00	Location	Good	Valid	N/A	0	-70.1134	41.9837	N/A		11	0	N	High	2019-11-28 02:38:00
0-1367074		1367074	A-Felicia	2019-11-28 03:51:00	Location	Good	Valid	N/A	0	-70.1071	41.9855	N/A		11	0	N	High	2019-11-28 03:51:00
0-1367074		1367074	A-Felicia	2019-11-28 04:49:00	Location	Good	Valid	N/A	0	-70.1028	41.9897	N/A		11	0	N	High	2019-11-28 04:49:00
0-1367074		1367074	A-Felicia	2019-11-28 05:32:00	Location	Good	Valid	N/A	0	-70.1019	41.9933	N/A		11	0	N	High	2019-11-28 05:32:00
0-1367074		1367074	A-Felicia	2019-11-28 06:47:00	Location	Good	Valid	N/A	0	-70.0997	41.9999	N/A		11	0	N	High	2019-11-28 06:47:00
0-1367074		1367074	A-Felicia	2019-11-28 07:46:00	Location	Good	Valid	N/A	0	-70.0971	42.003	N/A		11	0	N	High	2019-11-28 07:46:00
0-1367074		1367074	A-Felicia	2019-11-28 08:41:00	Location	Good	Valid	N/A	0	-70.0949	42.003	N/A		11	0	N	High	2019-11-28 08:41:00
0-1367074		1367074	A-Felicia	2019-11-28 09:52:00	Location	Good	Valid	N/A	0	-70.0938	42.002	N/A		11	0	N	High	2019-11-28 09:52:00
0-1367074		1367074	A-Felicia	2019-11-28 10:40:00	Location	Good	Valid	N/A	0	-70.0919	41.9987	N/A		11	0	N	High	2019-11-28 10:40:00
0-1367074		1367074	A-Felicia	2019-11-28 11:50:00	Location	Good	Valid	N/A	0	-70.0893	41.9963	N/A		11	0	N	High	2019-11-28 11:50:00
0-1367074		1367074	A-Felicia	2019-11-28 12:35:00	Location	Good	Valid	N/A	0	-70.0867	41.9944	N/A		11	0	N	High	2019-11-28 12:35:00
0-1367074		1367074	A-Felicia	2019-11-28 13:37:00	Location	Good	Valid	N/A	0	-70.0845	41.9916	N/A		11	0	N	High	2019-11-28 13:37:00
0-1367074		1367074	A-Felicia	2019-11-28 14:45:00	Location	Good	Valid	N/A	0	-70.0822	41.9868	N/A		11	0	N	High	2019-11-28 14:45:00
0-1367074		1367074	A-Felicia	2019-11-28 16:03:00	Location	Good	Valid	N/A	0	-70.0812	41.9819	N/A		11	0	N	High	2019-11-28 16:03:00
0-1367074		1367074	A-Felicia	2019-11-28 17:35:00	Location	Good	Valid	N/A	0	-70.081	41.9733	N/A		11	0	N	High	2019-11-28 17:35:00
0-1367074		1367074	A-Felicia	2019-11-28 18:50:00	Location	Good	Valid	N/A	0	-70.0814	41.9668	N/A		11	0	N	High	2019-11-28 18:50:00
0-1367074		1367074	A-Felicia	2019-11-28 19:44:00	Location	Good	Valid	N/A	0	-70.0819	41.9589	N/A		11	0	N	High	2019-11-28 19:44:00
0-1367074		1367074	A-Felicia	2019-11-28 21:01:00	Location	Good	Valid	N/A	0	-70.0822	41.9517	N/A		11	0	N	High	2019-11-28 21:01:00
0-1367074		1367074	A-Felicia	2019-11-28 21:55:00	Location	Good	Valid	N/A	0	-70.0826	41.9462	N/A		11	0	N	High	2019-11-28 21:55:00
0-1367074		1367074	A-Felicia	2019-11-28 22:46:00	Location	Good	Valid	N/A	0	-70.0826	41.939	N/A		11	0	N	High	2019-11-28 22:46:00
0-1367074		1367074	A-Felicia	2019-11-28 23:56:00	Location	Good	Valid	N/A	0	-70.0829	41.933	N/A		11	0	N	High	2019-11-28 23:56:00
0-1367074		1367074	A-Felicia	2019-11-29 00:44:00	Location	Good	Valid	N/A	0	-70.0834	41.9275	N/A		11	0	N	High	2019-11-29 00:44:00
0-1367074		1367074	A-Felicia	2019-11-29 01:41:00	Location	Good	Valid	N/A	0	-70.0827	41.9206	N/A		11	0	N	High	2019-11-29 01:41:00
0-1367074		1367074	A-Felicia	2019-11-29 02:47:00	Location	Good	Valid	N/A	0	-70.082	41.9143	N/A		11	0	N	High	2019-11-29 02:47:00
0-1367074		1367074	A-Felicia	2019-11-29 03:35:00	Location	Good	Valid	N/A	0	-70.0812	41.9103	N/A		11	0	N	High	2019-11-29 03:35:00
0-1367074		1367074	A-Felicia	2019-11-29 04:35:00	Location	Good	Valid	N/A	0	-70.0799	41.9035	N/A		11	0	N	High	2019-11-29 04:35:00
0-1367074		1367074	A-Felicia	2019-11-29 06:39:00	Location	Good	Valid	N/A	0	-70.0788	41.8944	N/A		11	0	N	High	2019-11-29 06:39:00
0-1367074		1367074	A-Felicia	2019-11-29 07:39:00	Location	Good	Valid	N/A	0	-70.0785	41.891	N/A		11	0	N	High	2019-11-29 07:39:00
0-1367074		1367074	A-Felicia	2019-11-29 08:42:00	Location	Good	Valid	N/A	0	-70.0787	41.8877	N/A		11	0	N	High	2019-11-29 08:42:00
0-1367074		1367074	A-Felicia	2019-11-29 09:55:00	Location	Good	Valid	N/A	0	-70.0797	41.8853	N/A		11	0	N	High	2019-11-29 09:55:00
0-1367074		1367074	A-Felicia	2019-11-29 10:33:00	Location	Good	Valid	N/A	0	-70.0802	41.8837	N/A		11	0	N	High	2019-11-29 10:33:00
0-1367074		1367074	A-Felicia	2019-11-29 11:55:00	Location	Good	Valid	N/A	0	-70.081	41.8808	N/A		11	0	N	High	2019-11-29 11:55:00
0-1367074		1367074	A-Felicia	2019-11-29 12:48:00	Location	Good	Valid	N/A	0	-70.0808	41.8782	N/A		11	0	N	High	2019-11-29 12:48:00
0-1367074		1367074	A-Felicia	2019-11-29 13:44:00	Location	Good	Valid	N/A	0	-70.0778	41.8755	N/A		11	0	N	High	2019-11-29 13:44:00
0-1367074		1367074	A-Felicia	2019-11-29 14:48:00	Location	Good	Valid	N/A	0	-70.0761	41.8745	N/A		11	0	N	High	2019-11-29 14:48:00
0-1367074		1367074	A-Felicia	2019-11-29 15:39:00	Location	Good	Valid	N/A	0	-70.0747	41.8736	N/A		11	0	N	High	2019-11-29 15:39:00
0-1367074		1367074	A-Felicia	2019-11-29 16:45:00	Location	Good	Valid	N/A	0	-70.071	41.872	N/A		11	0	N	High	2019-11-29 16:45:00
0-1367074		1367074	A-Felicia	2019-11-29 18:36:00	Location	Good	Valid	N/A	0	-70.0707	41.8694	N/A		11	0	N	High	2019-11-29 18:36:00
0-1367074		1367074	A-Felicia	2019-11-29 19:40:00	Location	Good	Valid	N/A	0	-70.0727	41.8674	N/A		11	0	N	High	2019-11-29 19:40:00
0-1367074		1367074	A-Felicia	2019-11-29 20:45:00	Location	Good	Valid	N/A	0	-70.074	41.8656	N/A		11	0	N	High	2019-11-29 20:45:00
0-1367074		1367074	A-Felicia	2019-11-29 21:49:00	Location	Good	Valid	N/A	0	-70.075	41.8637	N/A		11	0	N	High	2019-11-29 21:49:00
0-1367074		1367074	A-Felicia	2019-11-29 22:43:00	Location	Good	Valid	N/A	0	-70.0755	41.8621	N/A		11	0	N	High	2019-11-29 22:43:00
0-1367074		1367074	A-Felicia	2019-11-29 23:57:00	Location	Good	Valid	N/A	0	-70.075	41.86	N/A		11	0	N	Low	2019-11-29 23:57:00
0-1367074		1367074	A-Felicia	2019-11-30 00:50:00	Location	Good	Valid	N/A	0	-70.0741	41.8592	N/A		11	0	N	High	2019-11-30 00:50:00
0-1367074		1367074	A-Felicia	2019-11-30 01:49:00	Location	Good	Valid	N/A	0	-70.0727	41.8587	N/A		11	0	N	High	2019-11-30 01:49:00
0-1367074		1367074	A-Felicia	2019-11-30 02:45:00	Location	Good	Valid	N/A	0	-70.0719	41.8583	N/A		11	0	N	High	2019-11-30 02:45:00
0-1367074		1367074	A-Felicia	2019-11-30 04:34:00	Location	Good	Valid	N/A	0	-70.0709	41.858	N/A		11	0	N	High	2019-11-30 04:34:00
0-1367074		1367074	A-Felicia	2019-11-30 05:40:00	Location	Good	Valid	N/A	0	-70.0694	41.8575	N/A		11	0	N	High	2019-11-30 05:40:00
0-1367074		1367074	A-Felicia	2019-11-30 06:30:00	Location	Good	Valid	N/A	0	-70.0685	41.8569	N/A		11	0	N	High	2019-11-30 06:30:00
0-1367074		1367074	A-Felicia	2019-11-30 07:31:00	Location	Good	Valid	N/A	0	-70.0683	41.856	N/A		11	0	N	High	2019-11-30 07:31:00
0-1367074		1367074	A-Felicia	2019-11-30 08:46:00	Location	Good	Valid	N/A	0	-70.0688	41.8551	N/A		11	0	N	High	2019-11-30 08:46:00
0-1367074		1367074	A-Felicia	2019-11-30 09:43:00	Location	Good	Valid	N/A	0	-70.0707	41.8535	N/A		11	0	N	High	2019-11-30 09:43:00
0-1367074		1367074	A-Felicia	2019-11-30 10:41:00	Location	Good	Valid	N/A	0	-70.0741	41.8511	N/A		11	0	N	High	2019-11-30 10:41:00
0-1367074		1367074	A-Felicia	2019-11-30 11:31:00	Location	Good	Valid	N/A	0	-70.0763	41.8493	N/A		11	0	N	High	2019-11-30 11:31:00
0-1367074		1367074	A-Felicia	2019-11-30 12:50:00	Location	Good	Valid	N/A	0	-70.0763	41.849	N/A		11	0	N	High	2019-11-30 12:50:00
0-1367074		1367074	A-Felicia	2019-11-30 13:50:00	Location	Good	Valid	N/A	0	-70.0726	41.8492	N/A		11	0	N	High	2019-11-30 13:50:00
0-1367074		1367074	A-Felicia	2019-11-30 14:48:00	Location	Good	Valid	N/A	0	-70.0679	41.85	N/A		11	0	N	High	2019-11-30 14:48:00
0-1367074		1367074	A-Felicia	2019-11-30 15:38:00	Location	Good	Valid	N/A	0	-70.0649	41.8503	N/A		11	0	N	High	2019-11-30 15:38:00
0-1367074		1367074	A-Felicia	2019-11-30 16:44:00	Location	Good	Valid	N/A	0	-70.0615	41.8509	N/A		11	0	N	High	2019-11-30 16:44:00
0-1367074		1367074	A-Felicia	2019-11-30 17:48:00	Location	Good	Valid	N/A	0	-70.0587	41.8514	N/A		11	0	N	High	2019-11-30 17:48:00
0-1367074		1367074	A-Felicia	2019-11-30 18:48:00	Location	Good	Valid	N/A	0	-70.0542	41.8515	N/A		11	0	N	High	2019-11-30 18:48:00
0-1367074		1367074	A-Felicia	2019-11-30 19:35:00	Location	Good	Valid	N/A	0	-70.0526	41.8506	N/A		11	0	N	High	2019-11-30 19:35:00
0-1367074		1367074	A-Felicia	2019-11-30 20:49:00	Location	Good	Valid	N/A	0	-70.0527	41.8484	N/A		11	0	N	High	2019-11-30 20:49:00
0-1367074		1367074	A-Felicia	2019-11-30 21:40:00	Location	Good	Valid	N/A	0	-70.0531	41.8476	N/A		11	0	N	High	2019-11-30 21:40:00
0-1367074		1367074	A-Felicia	2019-11-30 22:35:00	Location	Good	Valid	N/A	0	-70.0546	41.8451	N/A		11	0	N	High	2019-11-30 22:35:00
0-1367074		1367074	A-Felicia	2019-11-30 23:45:00	Location	Good	Valid	N/A	0	-70.0595	41.8409	N/A		11	0	N	High	2019-11-30 23:45:00
0-1367074		1367074	A-Felicia	2019-12-01 00:56:00	Location	Good	Valid	N/A	0	-70.0667	41.8366	N/A		11	0	N	High	2019-12-01 00:56:00
0-1367074		1367074	A-Felicia	2019-12-01 01:39:00	Location	Good	Valid	N/A	0	-70.0673	41.8351	N/A		11	0	N	High	2019-12-01 01:39:00
0-1367074		1367074	A-Felicia	2019-12-01 02:45:00	Location	Good	Valid	N/A	0	-70.0634	41.835	N/A		11	0	N	High	2019-12-01 02:45:00
0-1367074		1367074	A-Felicia	2019-12-01 03:49:00	Location	Good	Valid	N/A	0	-70.0591	41.8361	N/A		11	0	N	High	2019-12-01 03:49:00
0-1367074		1367074	A-Felicia	2019-12-01 04:34:00	Location	Good	Valid	N/A	0	-70.0573	41.8366	N/A		11	0	N	High	2019-12-01 04:34:00
0-1367074		1367074	A-Felicia	2019-12-01 05:45:00	Location	Good	Valid	N/A	0	-70.0535	41.8374	N/A		11	0	N	High	2019-12-01 05:45:00
0-1367074		1367074	A-Felicia	2019-12-01 07:36:00	Location	Good	Valid	N/A	0	-70.0491	41.8383	N/A		11	0	N	High	2019-12-01 07:36:00
0-1367074		1367074	A-Felicia	2019-12-01 08:40:00	Location	Good	Valid	N/A	0	-70.0495	41.8382	N/A		11	0	N	High	2019-12-01 08:40:00
0-1367074		1367074	A-Felicia	2019-12-01 09:43:00	Location	Good	Valid	N/A	0	-70.0507	41.8376	N/A		11	0	N	High	2019-12-01 09:43:00
0-1367074		1367074	A-Felicia	2019-12-01 10:35:00	Location	Good	Valid	N/A	0	-70.0509	41.8375	N/A		11	0	N	High	2019-12-01 10:35:00
0-1367074		1367074	A-Felicia	2019-12-01 11:42:00	Location	Good	Valid	N/A	0	-70.0514	41.8372	N/A		11	0	N	High	2019-12-01 11:42:00
0-1367074		1367074	A-Felicia	2019-12-01 12:49:00	Location	Good	Valid	N/A	0	-70.0522	41.8369	N/A		11	0	N	High	2019-12-01 12:49:00
0-1367074		1367074	A-Felicia	2019-12-01 13:51:00	Location	Good	Valid	N/A	0	-70.0521	41.837	N/A		11	0	N	High	2019-12-01 13:51:00
0-1367074		1367074	A-Felicia	2019-12-01 14:39:00	Location	Good	Valid	N/A	0	-70.0519	41.8371	N/A		11	0	N	High	2019-12-01 14:39:00
0-1367074		1367074	A-Felicia	2019-12-01 15:39:00	Location	Good	Valid	N/A	0	-70.0514	41.8373	N/A		11	0	N	High	2019-12-01 15:39:00
0-1367074		1367074	A-Felicia	2019-12-01 16:56:00	Location	Good	Valid	N/A	0	-70.0514	41.8373	N/A		11	0	N	High	2019-12-01 16:56:00
0-1367074		1367074	A-Felicia	2019-12-01 17:37:00	Location	Good	Valid	N/A	0	-70.0514	41.8373	N/A		11	0	N	High	2019-12-01 17:37:00
0-1367074		1367074	A-Felicia	2019-12-01 18:49:00	Location	Good	Valid	N/A	0	-70.0514	41.8373	N/A		11	0	N	High	2019-12-01 18:49:00
0-1367074		1367074	A-Felicia	2019-12-01 19:32:00	Location	Good	Valid	N/A	0	-70.0513	41.8376	N/A		11	0	N	High	2019-12-01 19:32:00
0-1367074		1367074	A-Felicia	2019-12-01 20:48:00	Location	Good	Valid	N/A	0	-70.0517	41.8379	N/A		11	0	N	High	2019-12-01 20:48:00
0-1367074		1367074	A-Felicia	2019-12-01 21:46:00	Location	Good	Valid	N/A	0	-70.0522	41.838	N/A		11	0	N	High	2019-12-01 21:46:00
0-1367074		1367074	A-Felicia	2019-12-01 22:38:00	Location	Good	Valid	N/A	0	-70.0523	41.838	N/A		11	0	N	High	2019-12-01 22:38:00
0-1367074		1367074	A-Felicia	2019-12-01 23:34:00	Location	Good	Valid	N/A	0	-70.0526	41.838	N/A		11	0	N	High	2019-12-01 23:34:00
0-1367074		1367074	A-Felicia	2019-12-02 00:41:00	Location	Good	Valid	N/A	0	-70.0551	41.8371	N/A		11	0	N	High	2019-12-02 00:41:00
0-1367074		1367074	A-Felicia	2019-12-02 01:41:00	Location	Good	Valid	N/A	0	-70.0585	41.8358	N/A		11	0	N	High	2019-12-02 01:41:00
0-1367074		1367074	A-Felicia	2019-12-02 02:46:00	Location	Good	Valid	N/A	0	-70.0586	41.8357	N/A		11	0	N	High	2019-12-02 02:46:00
0-1367074		1367074	A-Felicia	2019-12-02 03:44:00	Location	Good	Valid	N/A	0	-70.0585	41.8359	N/A		11	0	N	High	2019-12-02 03:44:00
0-1367074		1367074	A-Felicia	2019-12-02 04:43:00	Location	Good	Valid	N/A	0	-70.0581	41.8365	N/A		11	0	N	High	2019-12-02 04:43:00
0-1367074		1367074	A-Felicia	2019-12-02 05:44:00	Location	Good	Valid	N/A	0	-70.0568	41.8374	N/A		11	0	N	High	2019-12-02 05:44:00
0-1367074		1367074	A-Felicia	2019-12-02 06:53:00	Location	Good	Valid	N/A	0	-70.0551	41.8381	N/A		11	0	N	High	2019-12-02 06:53:00
0-1367074		1367074	A-Felicia	2019-12-02 07:47:00	Location	Good	Valid	N/A	0	-70.0533	41.8397	N/A		11	0	N	High	2019-12-02 07:47:00
0-1367074		1367074	A-Felicia	2019-12-02 09:49:00	Location	Good	Valid	N/A	0	-70.0614	41.8395	N/A		11	0	N	Low	2019-12-02 09:49:00
0-1367074		1367074	A-Felicia	2019-12-02 10:36:00	Location	Good	Valid	N/A	0	-70.066	41.839	N/A		11	0	N	High	2019-12-02 10:36:00
0-1367074		1367074	A-Felicia	2019-12-02 11:42:00	Location	Good	Valid	N/A	0	-70.0703	41.8388	N/A		11	0	N	High	2019-12-02 11:42:00
0-1367074		1367074	A-Felicia	2019-12-02 12:41:00	Location	Good	Valid	N/A	0	-70.071	41.8387	N/A		11	0	N	High	2019-12-02 12:41:00
0-1367074		1367074	A-Felicia	2019-12-02 13:46:00	Location	Good	Valid	N/A	0	-70.072	41.8382	N/A		11	0	N	High	2019-12-02 13:46:00
0-1367074		1367074	A-Felicia	2019-12-02 14:45:00	Location	Good	Valid	N/A	0	-70.0719	41.8382	N/A		11	0	N	High	2019-12-02 14:45:00
0-1367074		1367074	A-Felicia	2019-12-02 15:39:00	Location	Good	Valid	N/A	0	-70.0714	41.8381	N/A		11	0	N	High	2019-12-02 15:39:00
0-1367074		1367074	A-Felicia	2019-12-02 16:35:00	Location	Good	Valid	N/A	0	-70.0658	41.8388	N/A		11	0	N	High	2019-12-02 16:35:00
0-1367074		1367074	A-Felicia	2019-12-02 17:43:00	Location	Good	Valid	N/A	0	-70.057	41.8405	N/A		11	0	N	High	2019-12-02 17:43:00
0-1367074		1367074	A-Felicia	2019-12-02 18:47:00	Location	Good	Valid	N/A	0	-70.0525	41.8416	N/A		11	0	N	High	2019-12-02 18:47:00
0-1367074		1367074	A-Felicia	2019-12-02 19:34:00	Location	Good	Valid	N/A	0	-70.0516	41.842	N/A		11	0	N	High	2019-12-02 19:34:00
0-1367074		1367074	A-Felicia	2019-12-02 20:43:00	Location	Good	Valid	N/A	0	-70.0516	41.842	N/A		11	0	N	High	2019-12-02 20:43:00
0-1367074		1367074	A-Felicia	2019-12-02 21:48:00	Location	Good	Valid	N/A	0	-70.0526	41.8419	N/A		11	0	N	High	2019-12-02 21:48:00
0-1367074		1367074	A-Felicia	2019-12-02 22:34:00	Location	Good	Valid	N/A	0	-70.0539	41.8412	N/A		11	0	N	High	2019-12-02 22:34:00
0-1367074		1367074	A-Felicia	2019-12-02 23:56:00	Location	Good	Valid	N/A	0	-70.057	41.8393	N/A		11	0	N	High	2019-12-02 23:56:00
0-1367074		1367074	A-Felicia	2019-12-03 00:46:00	Location	Good	Valid	N/A	0	-70.059	41.8383	N/A		11	0	N	High	2019-12-03 00:46:00
0-1367074		1367074	A-Felicia	2019-12-03 02:51:00	Location	Good	Valid	N/A	0	-70.0624	41.8366	N/A		11	0	N	High	2019-12-03 02:51:00
0-1367074		1367074	A-Felicia	2019-12-03 03:39:00	Location	Good	Valid	N/A	0	-70.0623	41.8366	N/A		11	0	N	High	2019-12-03 03:39:00
0-1367074		1367074	A-Felicia	2019-12-03 04:38:00	Location	Good	Valid	N/A	0	-70.0618	41.8368	N/A		11	0	N	High	2019-12-03 04:38:00
0-1367074		1367074	A-Felicia	2019-12-03 05:56:00	Location	Good	Valid	N/A	0	-70.0604	41.837	N/A		11	0	N	High	2019-12-03 05:56:00
0-1367074		1367074	A-Felicia	2019-12-03 06:41:00	Location	Good	Valid	N/A	0	-70.059	41.8372	N/A		11	0	N	High	2019-12-03 06:41:00
0-1367074		1367074	A-Felicia	2019-12-03 08:05:00	Location	Good	Valid	N/A	0	-70.0572	41.8373	N/A		11	0	N	High	2019-12-03 08:05:00
0-1367074		1367074	A-Felicia	2019-12-03 08:47:00	Location	Good	Valid	N/A	0	-70.0565	41.8373	N/A		11	0	N	High	2019-12-03 08:47:00
0-1367074		1367074	A-Felicia	2019-12-03 09:54:00	Location	Good	Valid	N/A	0	-70.0565	41.8373	N/A		11	0	N	High	2019-12-03 09:54:00
0-1367074		1367074	A-Felicia	2019-12-03 10:44:00	Location	Good	Valid	N/A	0	-70.0566	41.8372	N/A		11	0	N	High	2019-12-03 10:44:00
0-1367074		1367074	A-Felicia	2019-12-03 11:51:00	Location	Good	Valid	N/A	0	-70.0566	41.8372	N/A		11	0	N	High	2019-12-03 11:51:00
0-1367074		1367074	A-Felicia	2019-12-03 12:57:00	Location	Good	Valid	N/A	0	-70.0578	41.8366	N/A		11	0	N	High	2019-12-03 12:57:00
0-1367074		1367074	A-Felicia	2019-12-03 13:37:00	Location	Good	Valid	N/A	0	-70.0597	41.8357	N/A		11	0	N	High	2019-12-03 13:37:00
0-1367074		1367074	A-Felicia	2019-12-03 15:48:00	Location	Good	Valid	N/A	0	-70.0607	41.8347	N/A		11	0	N	High	2019-12-03 15:48:00
0-1367074		1367074	A-Felicia	2019-12-03 16:39:00	Location	Good	Valid	N/A	0	-70.0605	41.8348	N/A		11	0	N	High	2019-12-03 16:39:00
0-1367074		1367074	A-Felicia	2019-12-03 17:48:00	Location	Good	Valid	N/A	0	-70.06	41.8349	N/A		11	0	N	High	2019-12-03 17:48:00
0-1367074		1367074	A-Felicia	2019-12-03 18:51:00	Location	Good	Valid	N/A	0	-70.0585	41.8352	N/A		11	0	N	High	2019-12-03 18:51:00
0-1367074		1367074	A-Felicia	2019-12-03 19:56:00	Location	Good	Valid	N/A	0	-70.0572	41.8354	N/A		11	0	N	High	2019-12-03 19:56:00
0-1367074		1367074	A-Felicia	2019-12-03 20:39:00	Location	Good	Valid	N/A	0	-70.0563	41.8356	N/A		11	0	N	High	2019-12-03 20:39:00
0-1367074		1367074	A-Felicia	2019-12-03 21:59:00	Location	Good	Valid	N/A	0	-70.0561	41.8354	N/A		11	0	N	High	2019-12-03 21:59:00
0-1367074		1367074	A-Felicia	2019-12-03 22:51:00	Location	Good	Valid	N/A	0	-70.056	41.8352	N/A		11	0	N	High	2019-12-03 22:51:00
0-1367074		1367074	A-Felicia	2019-12-04 00:37:00	Location	Good	Valid	N/A	0	-70.0566	41.8347	N/A		11	0	N	High	2019-12-04 00:37:00
0-1367074		1367074	A-Felicia	2019-12-04 01:53:00	Location	Good	Valid	N/A	0	-70.0577	41.8336	N/A		11	0	N	High	2019-12-04 01:53:00
0-1367074		1367074	A-Felicia	2019-12-04 02:45:00	Location	Good	Valid	N/A	0	-70.0582	41.8332	N/A		11	0	N	High	2019-12-04 02:45:00
0-1367074		1367074	A-Felicia	2019-12-04 03:36:00	Location	Good	Valid	N/A	0	-70.0582	41.8332	N/A		11	0	N	High	2019-12-04 03:36:00
0-1367074		1367074	A-Felicia	2019-12-04 05:49:00	Location	Good	Valid	N/A	0	-70.058	41.8332	N/A		11	0	N	High	2019-12-04 05:49:00
0-1367074		1367074	A-Felicia	2019-12-04 06:53:00	Location	Good	Valid	N/A	0	-70.0571	41.8336	N/A		11	0	N	High	2019-12-04 06:53:00
0-1367074		1367074	A-Felicia	2019-12-04 07:58:00	Location	Good	Valid	N/A	0	-70.0552	41.8343	N/A		11	0	N	High	2019-12-04 07:58:00
0-1367074		1367074	A-Felicia	2019-12-04 08:37:00	Location	Good	Valid	N/A	0	-70.054	41.8348	N/A		11	0	N	High	2019-12-04 08:37:00
0-1367074		1367074	A-Felicia	2019-12-04 10:02:00	Location	Good	Valid	N/A	0	-70.0532	41.8351	N/A		11	0	N	High	2019-12-04 10:02:00
0-1367074		1367074	A-Felicia	2019-12-04 10:51:00	Location	Good	Valid	N/A	0	-70.0532	41.8351	N/A		11	0	N	High	2019-12-04 10:51:00
0-1367074		1367074	A-Felicia	2019-12-04 11:49:00	Location	Good	Valid	N/A	0	-70.0534	41.8351	N/A		11	0	N	High	2019-12-04 11:49:00
0-1367074		1367074	A-Felicia	2019-12-04 12:50:00	Location	Good	Valid	N/A	0	-70.0534	41.8351	N/A		11	0	N	High	2019-12-04 12:50:00
0-1367074		1367074	A-Felicia	2019-12-04 13:42:00	Location	Good	Valid	N/A	0	-70.0534	41.8351	N/A		11	0	N	High	2019-12-04 13:42:00
0-1367074		1367074	A-Felicia	2019-12-04 14:42:00	Location	Good	Valid	N/A	0	-70.0534	41.8351	N/A		11	0	N	High	2019-12-04 14:42:00
0-1367074		1367074	A-Felicia	2019-12-04 15:55:00	Location	Good	Valid	N/A	0	-70.0533	41.835	N/A		11	0	N	High	2019-12-04 15:55:00
0-1367074		1367074	A-Felicia	2019-12-04 16:39:00	Location	Good	Valid	N/A	0	-70.0532	41.8351	N/A		11	0	N	High	2019-12-04 16:39:00
0-1367074		1367074	A-Felicia	2019-12-04 17:43:00	Location	Good	Valid	N/A	0	-70.0531	41.8353	N/A		11	0	N	High	2019-12-04 17:43:00
0-1367074		1367074	A-Felicia	2019-12-04 18:45:00	Location	Good	Valid	N/A	0	-70.053	41.8353	N/A		11	0	N	High	2019-12-04 18:45:00
0-1367074		1367074	A-Felicia	2019-12-04 20:01:00	Location	Good	Valid	N/A	0	-70.0527	41.8355	N/A		11	0	N	High	2019-12-04 20:01:00
0-1367074		1367074	A-Felicia	2019-12-04 20:45:00	Location	Good	Valid	N/A	0	-70.0526	41.8355	N/A		11	0	N	High	2019-12-04 20:45:00
0-1367074		1367074	A-Felicia	2019-12-04 21:36:00	Location	Good	Valid	N/A	0	-70.0525	41.8356	N/A		11	0	N	High	2019-12-04 21:36:00
0-1367074		1367074	A-Felicia	2019-12-04 22:54:00	Location	Good	Valid	N/A	0	-70.0526	41.8357	N/A		11	0	N	High	2019-12-04 22:54:00
0-1367074		1367074	A-Felicia	2019-12-04 23:39:00	Location	Good	Valid	N/A	0	-70.0526	41.8356	N/A		11	0	N	High	2019-12-04 23:39:00
0-1367074		1367074	A-Felicia	2019-12-05 01:05:00	Location	Good	Valid	N/A	0	-70.0527	41.8356	N/A		11	0	N	High	2019-12-05 01:05:00
0-1367074		1367074	A-Felicia	2019-12-05 01:37:00	Location	Good	Valid	N/A	0	-70.0527	41.8355	N/A		11	0	N	High	2019-12-05 01:37:00
0-1367074		1367074	A-Felicia	2019-12-05 02:49:00	Location	Good	Valid	N/A	0	-70.0528	41.8355	N/A		11	0	N	High	2019-12-05 02:49:00
0-1367074		1367074	A-Felicia	2019-12-05 03:35:00	Location	Good	Valid	N/A	0	-70.0527	41.8355	N/A		11	0	N	High	2019-12-05 03:35:00
0-1367074		1367074	A-Felicia	2019-12-05 05:03:00	Location	Good	Valid	N/A	0	-70.0526	41.8355	N/A		11	0	N	High	2019-12-05 05:03:00
0-1367074		1367074	A-Felicia	2019-12-05 05:42:00	Location	Good	Valid	N/A	0	-70.0525	41.8356	N/A		11	0	N	High	2019-12-05 05:42:00
0-1367074		1367074	A-Felicia	2019-12-05 06:54:00	Location	Good	Valid	N/A	0	-70.0518	41.8359	N/A		11	0	N	High	2019-12-05 06:54:00
0-1367074		1367074	A-Felicia	2019-12-05 08:07:00	Location	Good	Valid	N/A	0	-70.0512	41.8362	N/A		11	0	N	Low	2019-12-05 08:07:00
0-1367074		1367074	A-Felicia	2019-12-05 08:50:00	Location	Good	Valid	N/A	0	-70.0503	41.8366	N/A		11	0	N	High	2019-12-05 08:50:00
0-1367074		1367074	A-Felicia	2019-12-05 09:54:00	Location	Good	Valid	N/A	0	-70.0497	41.8369	N/A		11	0	N	High	2019-12-05 09:54:00
0-1367074		1367074	A-Felicia	2019-12-05 12:01:00	Location	Good	Valid	N/A	0	-70.0496	41.8369	N/A		11	0	N	High	2019-12-05 12:01:00
0-1367074		1367074	A-Felicia	2019-12-05 12:55:00	Location	Good	Valid	N/A	0	-70.0497	41.8368	N/A		11	0	N	High	2019-12-05 12:55:00
0-1367074		1367074	A-Felicia	2019-12-05 14:00:00	Location	Good	Valid	N/A	0	-70.0497	41.8368	N/A		11	0	N	High	2019-12-05 14:00:00
0-1367074		1367074	A-Felicia	2019-12-05 14:55:00	Location	Good	Valid	N/A	0	-70.0501	41.8365	N/A		11	0	N	High	2019-12-05 14:55:00
0-1367074		1367074	A-Felicia	2019-12-05 15:48:00	Location	Good	Valid	N/A	0	-70.0508	41.836	N/A		11	0	N	High	2019-12-05 15:48:00
0-1367074		1367074	A-Felicia	2019-12-05 16:53:00	Location	Good	Valid	N/A	0	-70.0509	41.8358	N/A		11	0	N	High	2019-12-05 16:53:00
0-1367074		1367074	A-Felicia	2019-12-05 17:52:00	Location	Good	Valid	N/A	0	-70.0506	41.8358	N/A		11	0	N	High	2019-12-05 17:52:00
0-1367074		1367074	A-Felicia	2019-12-05 18:52:00	Location	Good	Valid	N/A	0	-70.0499	41.836	N/A		11	0	N	High	2019-12-05 18:52:00
0-1367074		1367074	A-Felicia	2019-12-05 23:39:00	Location	Good	Valid	N/A	0	-70.0449	41.8372	N/A		11	0	N	High	2019-12-05 23:39:00
0-1367074		1367074	A-Felicia	2019-12-06 02:51:00	Location	Good	Valid	N/A	0	-70.0455	41.8366	N/A		11	0	N	High	2019-12-06 02:51:00
0-1367074		1367074	A-Felicia	2019-12-06 03:55:00	Location	Good	Valid	N/A	0	-70.0461	41.8359	N/A		11	0	N	High	2019-12-06 03:55:00
0-1367074		1367074	A-Felicia	2019-12-06 04:49:00	Location	Good	Valid	N/A	0	-70.0465	41.8352	N/A		11	0	N	High	2019-12-06 04:49:00
0-1367074		1367074	A-Felicia	2019-12-06 06:11:00	Location	Good	Valid	N/A	0	-70.0465	41.8348	N/A		11	0	N	High	2019-12-06 06:11:00
0-1367074		1367074	A-Felicia	2019-12-06 07:48:00	Location	Good	Valid	N/A	0	-70.0435	41.8357	N/A		11	0	N	High	2019-12-06 07:48:00
0-1367074		1367074	A-Felicia	2019-12-06 08:55:00	Location	Good	Valid	N/A	0	-70.0419	41.8362	N/A		11	0	N	Low	2019-12-06 08:55:00
0-1367074		1367074	A-Felicia	2019-12-06 09:59:00	Location	Good	Valid	N/A	0	-70.0408	41.8366	N/A		11	0	N	High	2019-12-06 09:59:00
0-1367074		1367074	A-Felicia	2019-12-06 10:49:00	Location	Good	Valid	N/A	0	-70.0394	41.8371	N/A		11	0	N	High	2019-12-06 10:49:00
0-1367074		1367074	A-Felicia	2019-12-06 12:48:00	Location	Good	Valid	N/A	0	-70.0387	41.8371	N/A		11	0	N	High	2019-12-06 12:48:00
0-1367074		1367074	A-Felicia	2019-12-06 13:41:00	Location	Good	Valid	N/A	0	-70.0387	41.837	N/A		11	0	N	High	2019-12-06 13:41:00
0-1367074		1367074	A-Felicia	2019-12-06 14:38:00	Location	Good	Valid	N/A	0	-70.0388	41.837	N/A		11	0	N	High	2019-12-06 14:38:00
0-1367074		1367074	A-Felicia	2019-12-06 15:41:00	Location	Good	Valid	N/A	0	-70.0388	41.837	N/A		11	0	N	High	2019-12-06 15:41:00
0-1367074		1367074	A-Felicia	2019-12-06 17:45:00	Location	Good	Valid	N/A	0	-70.0388	41.8369	N/A		11	0	N	High	2019-12-06 17:45:00
0-1367074		1367074	A-Felicia	2019-12-06 18:39:00	Location	Good	Valid	N/A	0	-70.0387	41.837	N/A		11	0	N	High	2019-12-06 18:39:00
0-1367074		1367074	A-Felicia	2019-12-06 19:55:00	Location	Good	Valid	N/A	0	-70.0388	41.837	N/A		11	0	N	High	2019-12-06 19:55:00
0-1367074		1367074	A-Felicia	2019-12-06 20:55:00	Location	Good	Valid	N/A	0	-70.0387	41.837	N/A		11	0	N	High	2019-12-06 20:55:00
0-1367074		1367074	A-Felicia	2019-12-06 21:43:00	Location	Good	Valid	N/A	0	-70.0386	41.8371	N/A		11	0	N	High	2019-12-06 21:43:00
0-1367074		1367074	A-Felicia	2019-12-06 22:40:00	Location	Good	Valid	N/A	0	-70.0385	41.8372	N/A		11	0	N	High	2019-12-06 22:40:00
0-1367074		1367074	A-Felicia	2019-12-06 23:52:00	Location	Good	Valid	N/A	0	-70.0386	41.8376	N/A		11	0	N	High	2019-12-06 23:52:00
0-1367074		1367074	A-Felicia	2019-12-07 00:50:00	Location	Good	Valid	N/A	0	-70.0384	41.8378	N/A		11	0	N	High	2019-12-07 00:50:00
0-1367074		1367074	A-Felicia	2019-12-07 01:57:00	Location	Good	Valid	N/A	0	-70.0381	41.8376	N/A		11	0	N	High	2019-12-07 01:57:00
0-1367074		1367074	A-Felicia	2019-12-07 02:43:00	Location	Good	Valid	N/A	0	-70.0381	41.8374	N/A		11	0	N	Low	2019-12-07 02:43:00
0-1367074		1367074	A-Felicia	2019-12-07 04:40:00	Location	Good	Valid	N/A	1	-70.0387	41.8366	N/A		11	0	N	High	2019-12-07 04:40:00
0-1367074		1367074	A-Felicia	2019-12-07 06:04:00	Location	Good	Valid	N/A	0	-70.0396	41.8349	N/A		11	0	N	High	2019-12-07 06:04:00
0-1367074		1367074	A-Felicia	2019-12-07 06:45:00	Location	Good	Valid	N/A	0	-70.0393	41.8343	N/A		11	0	N	Low	2019-12-07 06:45:00
0-1367074		1367074	A-Felicia	2019-12-07 08:59:00	Location	Good	Valid	N/A	0	-70.0379	41.8344	N/A		11	0	N	High	2019-12-07 08:59:00
0-1367074		1367074	A-Felicia	2019-12-07 09:56:00	Location	Good	Valid	N/A	0	-70.0372	41.8345	N/A		11	0	N	High	2019-12-07 09:56:00
0-1367074		1367074	A-Felicia	2019-12-07 11:46:00	Location	Good	Valid	N/A	0	-70.0366	41.8347	N/A		11	0	N	High	2019-12-07 11:46:00
0-1367074		1367074	A-Felicia	2019-12-07 13:57:00	Location	Good	Valid	N/A	0	-70.0364	41.8345	N/A		11	0	N	Low	2019-12-07 13:57:00
0-1367074		1367074	A-Felicia	2019-12-07 15:03:00	Location	Good	Valid	N/A	0	-70.0365	41.8345	N/A		11	0	N	High	2019-12-07 15:03:00
0-1367074		1367074	A-Felicia	2019-12-07 17:09:00	Location	Good	Valid	N/A	0	-70.0366	41.8345	N/A		11	0	N	High	2019-12-07 17:09:00
0-1367074		1367074	A-Felicia	2019-12-07 18:04:00	Location	Good	Valid	N/A	0	-70.0366	41.8343	N/A		11	0	N	High	2019-12-07 18:04:00
0-1367074		1367074	A-Felicia	2019-12-07 19:49:00	Location	Good	Valid	N/A	0	-70.0365	41.8343	N/A		11	0	N	High	2019-12-07 19:49:00
0-1367074		1367074	A-Felicia	2019-12-07 21:00:00	Location	Good	Valid	N/A	0	-70.0365	41.8343	N/A		11	0	N	High	2019-12-07 21:00:00
0-1367074		1367074	A-Felicia	2019-12-07 21:42:00	Location	Good	Valid	N/A	0	-70.0365	41.8343	N/A		11	0	N	High	2019-12-07 21:42:00
0-1367074		1367074	A-Felicia	2019-12-07 22:45:00	Location	Good	Valid	N/A	0	-70.0364	41.8344	N/A		11	0	N	High	2019-12-07 22:45:00
0-1367074		1367074	A-Felicia	2019-12-07 23:52:00	Location	Good	Valid	N/A	0	-70.0361	41.8346	N/A		11	0	N	High	2019-12-07 23:52:00
0-1367074		1367074	A-Felicia	2019-12-08 01:53:00	Location	Good	Valid	N/A	0	-70.0359	41.8346	N/A		11	0	N	High	2019-12-08 01:53:00
0-1367074		1367074	A-Felicia	2019-12-08 02:39:00	Location	Good	Valid	N/A	0	-70.036	41.8346	N/A		11	0	N	High	2019-12-08 02:39:00
0-1367074		1367074	A-Felicia	2019-12-08 04:51:00	Location	Good	Valid	N/A	0	-70.0364	41.8338	N/A		11	0	N	High	2019-12-08 04:51:00
0-1367074		1367074	A-Felicia	2019-12-08 05:52:00	Location	Good	Valid	N/A	0	-70.0368	41.833	N/A		11	0	N	High	2019-12-08 05:52:00
0-1367074		1367074	A-Felicia	2019-12-08 07:41:00	Location	Good	Valid	N/A	0	-70.0368	41.8329	N/A		11	0	N	High	2019-12-08 07:41:00
0-1367074		1367074	A-Felicia	2019-12-08 08:49:00	Location	Good	Valid	N/A	0	-70.0367	41.833	N/A		11	0	N	Low	2019-12-08 08:49:00
0-1367074		1367074	A-Felicia	2019-12-08 09:53:00	Location	Good	Valid	N/A	0	-70.0367	41.833	N/A		11	0	N	High	2019-12-08 09:53:00
0-1367074		1367074	A-Felicia	2019-12-08 10:51:00	Location	Good	Valid	N/A	0	-70.0367	41.833	N/A		11	0	N	High	2019-12-08 10:51:00
0-1367074		1367074	A-Felicia	2019-12-08 13:50:00	Location	Good	Valid	N/A	0	-70.0367	41.833	N/A		11	0	N	High	2019-12-08 13:50:00
0-1367074		1367074	A-Felicia	2019-12-08 15:08:00	Location	Good	Valid	N/A	0	-70.0367	41.833	N/A		11	0	N	High	2019-12-08 15:08:00
0-1367074		1367074	A-Felicia	2019-12-08 16:54:00	Location	Good	Valid	N/A	0	-70.0369	41.8328	N/A		11	0	N	High	2019-12-08 16:54:00
0-1367074		1367074	A-Felicia	2019-12-08 18:04:00	Location	Good	Valid	N/A	0	-70.0369	41.8329	N/A		11	0	N	High	2019-12-08 18:04:00
0-1367074		1367074	A-Felicia	2019-12-08 18:56:00	Location	Good	Valid	N/A	0	-70.0368	41.8329	N/A		11	0	N	High	2019-12-08 18:56:00
0-1367074		1367074	A-Felicia	2019-12-08 19:46:00	Location	Good	Valid	N/A	0	-70.0367	41.833	N/A		11	0	N	Low	2019-12-08 19:46:00
0-1367074		1367074	A-Felicia	2019-12-08 20:56:00	Location	Good	Valid	N/A	0	-70.0367	41.833	N/A		11	0	N	High	2019-12-08 20:56:00
0-1367074		1367074	A-Felicia	2019-12-08 21:52:00	Location	Good	Valid	N/A	0	-70.0367	41.8331	N/A		11	0	N	High	2019-12-08 21:52:00
0-1367074		1367074	A-Felicia	2019-12-08 22:54:00	Location	Good	Valid	N/A	0	-70.0366	41.8331	N/A		11	0	N	High	2019-12-08 22:54:00
0-1367074		1367074	A-Felicia	2019-12-08 23:43:00	Location	Good	Valid	N/A	0	-70.0365	41.8333	N/A		11	0	N	High	2019-12-08 23:43:00
0-1367074		1367074	A-Felicia	2019-12-09 05:47:00	Location	Good	Valid	N/A	0	-70.0365	41.8336	N/A		11	0	N	High	2019-12-09 05:47:00
0-1367074		1367074	A-Felicia	2019-12-09 07:07:00	Location	Good	Valid	N/A	0	-70.0365	41.8335	N/A		11	0	N	High	2019-12-09 07:07:00
0-1367074		1367074	A-Felicia	2019-12-09 07:59:00	Location	Good	Valid	N/A	0	-70.0364	41.8335	N/A		11	0	N	High	2019-12-09 07:59:00
0-1367074		1367074	A-Felicia	2019-12-09 08:41:00	Location	Good	Valid	N/A	0	-70.0363	41.8337	N/A		11	0	N	High	2019-12-09 08:41:00
0-1367074		1367074	A-Felicia	2019-12-09 09:58:00	Location	Good	Valid	N/A	0	-70.0361	41.834	N/A		11	0	N	High	2019-12-09 09:58:00
0-1367074		1367074	A-Felicia	2019-12-09 10:53:00	Location	Good	Valid	N/A	0	-70.036	41.8341	N/A		11	0	N	High	2019-12-09 10:53:00
0-1367074		1367074	A-Felicia	2019-12-09 11:49:00	Location	Good	Valid	N/A	0	-70.036	41.8342	N/A		11	0	N	High	2019-12-09 11:49:00
0-1367074		1367074	A-Felicia	2019-12-09 12:57:00	Location	Good	Valid	N/A	0	-70.036	41.8341	N/A		11	0	N	High	2019-12-09 12:57:00
0-1367074		1367074	A-Felicia	2019-12-09 13:54:00	Location	Good	Valid	N/A	0	-70.036	41.8341	N/A		11	0	N	High	2019-12-09 13:54:00
0-1367074		1367074	A-Felicia	2019-12-09 14:51:00	Location	Good	Valid	N/A	0	-70.036	41.8342	N/A		11	0	N	High	2019-12-09 14:51:00
0-1367074		1367074	A-Felicia	2019-12-09 15:56:00	Location	Good	Valid	N/A	0	-70.0363	41.8343	N/A		11	0	N	High	2019-12-09 15:56:00
0-1367074		1367074	A-Felicia	2019-12-09 17:02:00	Location	Good	Valid	N/A	0	-70.0364	41.8343	N/A		11	0	N	High	2019-12-09 17:02:00
0-1367074		1367074	A-Felicia	2019-12-09 17:48:00	Location	Good	Valid	N/A	0	-70.0364	41.8342	N/A		11	0	N	High	2019-12-09 17:48:00
0-1367074		1367074	A-Felicia	2019-12-09 18:50:00	Location	Good	Valid	N/A	0	-70.0364	41.8342	N/A		11	0	N	High	2019-12-09 18:50:00
0-1367074		1367074	A-Felicia	2019-12-09 19:53:00	Location	Good	Valid	N/A	0	-70.0364	41.8342	N/A		11	0	N	Low	2019-12-09 19:53:00
0-1367074		1367074	A-Felicia	2019-12-09 20:46:00	Location	Good	Valid	N/A	0	-70.0363	41.8344	N/A		11	0	N	High	2019-12-09 20:46:00
0-1367074		1367074	A-Felicia	2019-12-09 22:46:00	Location	Good	Valid	N/A	0	-70.0351	41.8372	N/A		11	0	N	High	2019-12-09 22:46:00
0-1367074		1367074	A-Felicia	2019-12-10 00:48:00	Location	Good	Valid	N/A	0	-70.0286	41.8528	N/A		11	0	N	Low	2019-12-10 00:48:00
0-1367074		1367074	A-Felicia	2019-12-10 05:05:00	Location	Good	Valid	N/A	0	-70.0195	41.8923	N/A		11	0	N	High	2019-12-10 05:05:00
0-1367074		1367074	A-Felicia	2019-12-10 06:14:00	Location	Good	Valid	N/A	0	-70.0195	41.8923	N/A		11	0	N	High	2019-12-10 06:14:00
0-1367074		1367074	A-Felicia	2019-12-10 06:56:00	Location	Good	Valid	N/A	0	-70.0195	41.8923	N/A		11	0	N	High	2019-12-10 06:56:00
0-1367074		1367074	A-Felicia	2019-12-10 07:55:00	Location	Good	Valid	N/A	0	-70.0195	41.8923	N/A		11	0	N	High	2019-12-10 07:55:00
0-1367074		1367074	A-Felicia	2019-12-10 11:04:00	Location	Good	Valid	N/A	0	-70.0195	41.8923	N/A		11	0	N	High	2019-12-10 11:04:00
0-1367074		1367074	A-Felicia	2019-12-10 11:56:00	Location	Good	Valid	N/A	0	-70.0195	41.8923	N/A		11	0	N	High	2019-12-10 11:56:00
