# Supplementary material for: Developing bottom drifters to better understand the stranding locations of cold-stunned sea turtles in Cape Cod Bay, Massachusetts
Source: PeerJ. 2023 Aug 30;11:e15866. doi: 10.7717/peerj.15866 (PMC10474834; doi:10.7717/peerj.15866)
Supplement: Supplemental Information 21 — This data was used to estimate wind speed around the time of the drifter deployments. [file peerj-11-15866-s021.xlsx]

## Sheet: 31October
Date	Time (EST)	Time (GMT)	Air Temperature	Dew Point	Humidity	Wind Direction	Wind Speed	Wind Gust	Pressure	Precip.	Condition
2019-10-31	00:56:00	04:56:00	61 F	61 F	100 %	S	12 mph	0 mph	0.00 in	0.0 in	Cloudy		*EST=GMT -4
2019-10-31	01:56:00	05:56:00	61 F	61 F	100 %	S	9 mph	0 mph	0.00 in	0.0 in	Mostly Cloudy
2019-10-31	02:56:00	06:56:00	62 F	62 F	100 %	S	9 mph	0 mph	0.00 in	0.0 in	Light Rain
2019-10-31	03:56:00	07:56:00	61 F	61 F	100 %	S	12 mph	0 mph	0.00 in	0.0 in	Light Rain
2019-10-31	04:56:00	08:56:00	62 F	62 F	100 %	S	10 mph	0 mph	0.00 in	0.0 in	Light Rain
2019-10-31	05:56:00	09:56:00	62 F	62 F	100 %	S	12 mph	0 mph	0.00 in	0.0 in	Cloudy
2019-10-31	06:56:00	10:56:00	62 F	62 F	100 %	S	15 mph	23 mph	0.00 in	0.0 in	Cloudy
2019-10-31	07:56:00	11:56:00	62 F	62 F	100 %	S	16 mph	25 mph	30.01 in	0.0 in	Light Rain
2019-10-31	08:56:00	12:56:00	62 F	62 F	100 %	S	18 mph	26 mph	30.00 in	0.0 in	Light Rain
2019-10-31	09:56:00	13:56:00	63 F	63 F	100 %	S	18 mph	29 mph	29.99 in	0.0 in	Cloudy
2019-10-31	10:56:00	14:56:00	64 F	63 F	96 %	S	19 mph	29 mph	29.96 in	0.0 in	Cloudy
2019-10-31	11:56:00	15:56:00	64 F	63 F	96 %	S	18 mph	28 mph	29.93 in	0.0 in	Cloudy
2019-10-31	12:56:00	16:56:00	64 F	63 F	96 %	S	20 mph	28 mph	29.91 in	0.0 in	Mostly Cloudy
2019-10-31	13:56:00	17:56:00	64 F	62 F	93 %	S	17 mph	26 mph	29.89 in	0.0 in	Cloudy
2019-10-31	14:56:00	18:56:00	64 F	62 F	93 %	S	17 mph	29 mph	29.87 in	0.0 in	Fair
2019-10-31	15:56:00	19:56:00	64 F	62 F	93 %	S	21 mph	30 mph	29.85 in	0.0 in	Mostly Cloudy / Windy
2019-10-31	16:56:00	20:56:00	64 F	62 F	93 %	S	18 mph	26 mph	29.83 in	0.0 in	Fair
2019-10-31	17:56:00	21:56:00	64 F	62 F	93 %	S	18 mph	29 mph	29.82 in	0.0 in	Cloudy
2019-10-31	18:56:00	22:56:00	64 F	63 F	96 %	S	23 mph	33 mph	29.81 in	0.0 in	Mostly Cloudy / Windy
2019-10-31	19:56:00	23:56:00	64 F	62 F	93 %	SSW	21 mph	29 mph	29.78 in	0.0 in	Cloudy / Windy
2019-10-31	20:56:00	1900-01-01 00:56:00	64 F	62 F	93 %	S	20 mph	30 mph	29.74 in	0.0 in	Mostly Cloudy
2019-10-31	21:56:00	1900-01-01 01:56:00	65 F	62 F	90 %	SSW	23 mph	32 mph	29.71 in	0.0 in	Cloudy / Windy
2019-10-31	22:56:00	1900-01-01 02:56:00	65 F	62 F	90 %	SSW	22 mph	31 mph	29.70 in	0.0 in	Cloudy / Windy
2019-10-31	23:56:00	1900-01-01 03:56:00	65 F	63 F	93 %	S	22 mph	33 mph	29.66 in	0.0 in	Cloudy / Windy
2019-11-01	00:56:00	04:56:00	66 F	63 F	90 %	S	22 mph	32 mph	29.62 in	0.0 in	Cloudy / Windy
2019-11-01	01:56:00	05:56:00	66 F	63 F	90 %	SSW	23 mph	35 mph	29.58 in	0.0 in	Cloudy / Windy
2019-11-01	02:56:00	06:56:00	66 F	64 F	93 %	S	28 mph	41 mph	29.53 in	0.0 in	Cloudy / Windy
2019-11-01	03:56:00	07:56:00	66 F	64 F	93 %	S	25 mph	40 mph	29.50 in	0.0 in	Cloudy / Windy
2019-11-01	04:56:00	08:56:00	59 F	53 F	81 %	W	32 mph	46 mph	29.58 in	0.0 in	Cloudy / Windy
2019-11-01	05:56:00	09:56:00	55 F	47 F	74 %	SW	32 mph	43 mph	29.62 in	0.0 in	Cloudy / Windy
2019-11-01	06:56:00	10:56:00	53 F	45 F	74 %	WSW	25 mph	35 mph	29.70 in	0.0 in	Cloudy / Windy
2019-11-01	07:56:00	11:56:00	54 F	43 F	66 %	W	26 mph	33 mph	29.76 in	0.0 in	Fair / Windy
2019-11-01	08:56:00	12:56:00	55 F	39 F	55 %	W	23 mph	31 mph	29.81 in	0.0 in	Fair / Windy
2019-11-01	09:56:00	13:56:00	55 F	36 F	49 %	W	23 mph	0 mph	29.84 in	0.0 in	Fair / Windy
2019-11-01	10:56:00	14:56:00	56 F	36 F	47 %	W	23 mph	28 mph	29.85 in	0.0 in	Fair / Windy
2019-11-01	11:56:00	15:56:00	57 F	36 F	45 %	WSW	21 mph	24 mph	29.87 in	0.0 in	Fair / Windy
2019-11-01	12:56:00	16:56:00	58 F	36 F	44 %	W	18 mph	25 mph	29.89 in	0.0 in	Fair
2019-11-01	13:56:00	17:56:00	58 F	36 F	44 %	W	17 mph	0 mph	29.92 in	0.0 in	Fair
2019-11-01	14:56:00	18:56:00	57 F	37 F	47 %	W	15 mph	23 mph	29.97 in	0.0 in	Fair
2019-11-01	15:56:00	19:56:00	56 F	35 F	45 %	W	13 mph	0 mph	30.00 in	0.0 in	Fair
2019-11-01	16:56:00	20:56:00	53 F	31 F	43 %	WNW	22 mph	30 mph	30.04 in	0.0 in	Fair / Windy
2019-11-01	17:56:00	21:56:00	51 F	32 F	48 %	WNW	21 mph	24 mph	30.09 in	0.0 in	Fair / Windy
2019-11-01	18:56:00	22:56:00	50 F	32 F	50 %	WNW	22 mph	28 mph	30.12 in	0.0 in	Fair / Windy
2019-11-01	19:56:00	23:56:00	48 F	31 F	52 %	WNW	16 mph	23 mph	30.15 in	0.0 in	Fair
2019-11-01	20:56:00	1900-01-01 00:56:00	47 F	32 F	56 %	WNW	14 mph	21 mph	30.17 in	0.0 in	Fair
2019-11-01	21:56:00	1900-01-01 01:56:00	46 F	31 F	56 %	WNW	14 mph	22 mph	30.18 in	0.0 in	Fair
2019-11-01	22:56:00	1900-01-01 02:56:00	46 F	31 F	56 %	NW	17 mph	22 mph	30.17 in	0.0 in	Fair

## Sheet: 14November
Date	Time (EST)	Time (GMT)	Air Temperature	Dew Point	Humidity	Wind Direction	Wind Speed	Wind Gust	Pressure	Precip.	Condition
2019-11-14	00:56:00	05:56:00	28 F	18 F	66 %	N	5 mph	0 mph	30.43 in	0.0 in	Mostly Cloudy
2019-11-14	01:56:00	06:56:00	28 F	18 F	66 %	N	3 mph	0 mph	30.45 in	0.0 in	Cloudy
2019-11-14	02:56:00	07:56:00	24 F	16 F	71 %	SSE	3 mph	0 mph	30.46 in	0.0 in	Mostly Cloudy
2019-11-14	03:56:00	08:56:00	23 F	15 F	72 %	S	3 mph	0 mph	30.45 in	0.0 in	Fair
2019-11-14	04:56:00	09:56:00	20 F	13 F	74 %	CALM	0 mph	0 mph	30.47 in	0.0 in	Fair
2019-11-14	05:56:00	10:56:00	18 F	11 F	74 %	CALM	0 mph	0 mph	30.47 in	0.0 in	Fair
2019-11-14	06:56:00	11:56:00	19 F	13 F	77 %	E	3 mph	0 mph	30.48 in	0.0 in	Fair
2019-11-14	07:56:00	12:56:00	29 F	24 F	82 %	SSE	5 mph	0 mph	30.49 in	0.0 in	Mostly Cloudy
2019-11-14	08:56:00	13:56:00	34 F	26 F	73 %	SW	8 mph	0 mph	30.50 in	0.0 in	Cloudy
2019-11-14	09:56:00	14:56:00	35 F	25 F	67 %	SSW	9 mph	0 mph	30.50 in	0.0 in	Fair
2019-11-14	10:56:00	15:56:00	36 F	20 F	52 %	SW	8 mph	0 mph	30.48 in	0.0 in	Fair
2019-11-14	11:56:00	16:56:00	37 F	26 F	65 %	SSW	9 mph	0 mph	30.46 in	0.0 in	Fair
2019-11-14	12:56:00	17:56:00	40 F	27 F	60 %	S	12 mph	0 mph	30.43 in	0.0 in	Fair
2019-11-14	13:56:00	18:56:00	39 F	28 F	65 %	SSE	8 mph	0 mph	30.41 in	0.0 in	Cloudy
2019-11-14	14:56:00	19:56:00	40 F	31 F	70 %	S	10 mph	0 mph	30.40 in	0.0 in	Cloudy
2019-11-14	15:56:00	20:56:00	40 F	34 F	79 %	S	8 mph	0 mph	30.39 in	0.0 in	Cloudy
2019-11-14	16:56:00	21:56:00	41 F	35 F	79 %	SSE	10 mph	0 mph	30.36 in	0.0 in	Fair
2019-11-14	17:56:00	22:56:00	42 F	37 F	82 %	SE	9 mph	0 mph	30.35 in	0.0 in	Fair
2019-11-14	18:56:00	23:56:00	43 F	39 F	86 %	SSE	8 mph	0 mph	30.32 in	0.0 in	Fair
2019-11-14	19:56:00	1900-01-01 00:56:00	44 F	40 F	85 %	S	6 mph	0 mph	30.30 in	0.0 in	Fair
2019-11-14	20:56:00	1900-01-01 01:56:00	47 F	40 F	77 %	S	8 mph	0 mph	30.29 in	0.0 in	Fair
2019-11-14	21:56:00	1900-01-01 02:56:00	48 F	41 F	77 %	S	10 mph	0 mph	30.28 in	0.0 in	Mostly Cloudy
2019-11-14	22:56:00	1900-01-01 03:56:00	49 F	42 F	77 %	SSW	8 mph	0 mph	30.26 in	0.0 in	Cloudy
2019-11-14	23:56:00	1900-01-01 04:56:00	46 F	39 F	76 %	W	7 mph	0 mph	30.25 in	0.0 in	Mostly Cloudy
2019-11-15	00:56:00	05:56:00	45 F	39 F	80 %	W	8 mph	0 mph	30.24 in	0.0 in	Mostly Cloudy
2019-11-15	01:56:00	06:56:00	45 F	37 F	74 %	W	16 mph	0 mph	30.23 in	0.0 in	Mostly Cloudy
2019-11-15	02:56:00	07:56:00	44 F	32 F	63 %	W	15 mph	0 mph	30.22 in	0.0 in	Fair
2019-11-15	03:56:00	08:56:00	43 F	31 F	62 %	W	16 mph	0 mph	30.21 in	0.0 in	Fair
2019-11-15	04:56:00	09:56:00	42 F	29 F	60 %	WSW	14 mph	0 mph	30.20 in	0.0 in	Fair
2019-11-15	05:56:00	10:56:00	42 F	27 F	55 %	W	14 mph	0 mph	30.20 in	0.0 in	Fair
2019-11-15	06:56:00	11:56:00	42 F	27 F	55 %	WSW	14 mph	0 mph	30.19 in	0.0 in	Partly Cloudy
2019-11-15	07:56:00	12:56:00	43 F	28 F	56 %	WSW	15 mph	0 mph	30.20 in	0.0 in	Mostly Cloudy
2019-11-15	08:56:00	13:56:00	45 F	28 F	52 %	WSW	17 mph	22 mph	30.19 in	0.0 in	Fair
2019-11-15	09:56:00	14:56:00	47 F	30 F	52 %	WSW	17 mph	0 mph	30.17 in	0.0 in	Fair
2019-11-15	10:56:00	15:56:00	50 F	30 F	46 %	SW	20 mph	0 mph	30.14 in	0.0 in	Fair
2019-11-15	11:56:00	16:56:00	51 F	30 F	44 %	SW	17 mph	25 mph	30.10 in	0.0 in	Fair
2019-11-15	12:56:00	17:56:00	52 F	33 F	49 %	SW	21 mph	26 mph	30.06 in	0.0 in	Fair / Windy
2019-11-15	13:56:00	18:56:00	52 F	36 F	54 %	SW	20 mph	31 mph	30.05 in	0.0 in	Fair
2019-11-15	14:56:00	19:56:00	50 F	36 F	59 %	SW	20 mph	28 mph	30.04 in	0.0 in	Fair
2019-11-15	15:56:00	20:56:00	49 F	37 F	64 %	SW	17 mph	24 mph	30.03 in	0.0 in	Fair
2019-11-15	16:56:00	21:56:00	48 F	38 F	68 %	SW	12 mph	0 mph	30.05 in	0.0 in	Fair
2019-11-15	17:56:00	22:56:00	47 F	37 F	68 %	WSW	15 mph	0 mph	30.07 in	0.0 in	Fair
2019-11-15	18:56:00	23:56:00	48 F	33 F	56 %	W	12 mph	0 mph	30.08 in	0.0 in	Fair
2019-11-15	19:56:00	1900-01-01 00:56:00	48 F	30 F	50 %	W	13 mph	21 mph	30.08 in	0.0 in	Fair
2019-11-15	20:56:00	1900-01-01 01:56:00	47 F	30 F	52 %	WNW	18 mph	0 mph	30.09 in	0.0 in	Fair
2019-11-15	21:56:00	1900-01-01 02:56:00	45 F	32 F	60 %	WNW	21 mph	29 mph	30.14 in	0.0 in	Fair / Windy
2019-11-15	22:56:00	1900-01-01 03:56:00	44 F	28 F	53 %	NW	21 mph	29 mph	30.15 in	0.0 in	Fair / Windy
2019-11-15	23:56:00	1900-01-01 04:56:00	43 F	29 F	58 %	NW	18 mph	25 mph	30.16 in	0.0 in	Fair

## Sheet: 15November
Date	Time (EST)	Time (GMT)	Air Temperature	Dew Point	Humidity	Wind Direction	Wind Speed	Wind Gust	Pressure	Precip.	Condition		Convert time to GMT
2019-11-15	00:56:00	05:56:00	45 F	39 F	80 %	W	8 mph	0 mph	30.24 in	0.0 in	Mostly Cloudy
2019-11-15	01:56:00	06:56:00	45 F	37 F	74 %	W	16 mph	0 mph	30.23 in	0.0 in	Mostly Cloudy
2019-11-15	02:56:00	07:56:00	44 F	32 F	63 %	W	15 mph	0 mph	30.22 in	0.0 in	Fair
2019-11-15	03:56:00	08:56:00	43 F	31 F	62 %	W	16 mph	0 mph	30.21 in	0.0 in	Fair
2019-11-15	04:56:00	09:56:00	42 F	29 F	60 %	WSW	14 mph	0 mph	30.20 in	0.0 in	Fair		*EST=GMT -5
2019-11-15	05:56:00	10:56:00	42 F	27 F	55 %	W	14 mph	0 mph	30.20 in	0.0 in	Fair
2019-11-15	06:56:00	11:56:00	42 F	27 F	55 %	WSW	14 mph	0 mph	30.19 in	0.0 in	Partly Cloudy
2019-11-15	07:56:00	12:56:00	43 F	28 F	56 %	WSW	15 mph	0 mph	30.20 in	0.0 in	Mostly Cloudy
2019-11-15	08:56:00	13:56:00	45 F	28 F	52 %	WSW	17 mph	22 mph	30.19 in	0.0 in	Fair
2019-11-15	09:56:00	14:56:00	47 F	30 F	52 %	WSW	17 mph	0 mph	30.17 in	0.0 in	Fair
2019-11-15	10:56:00	15:56:00	50 F	30 F	46 %	SW	20 mph	0 mph	30.14 in	0.0 in	Fair
2019-11-15	11:56:00	16:56:00	51 F	30 F	44 %	SW	17 mph	25 mph	30.10 in	0.0 in	Fair
2019-11-15	12:56:00	17:56:00	52 F	33 F	49 %	SW	21 mph	26 mph	30.06 in	0.0 in	Fair / Windy
2019-11-15	13:56:00	18:56:00	52 F	36 F	54 %	SW	20 mph	31 mph	30.05 in	0.0 in	Fair
2019-11-15	14:56:00	19:56:00	50 F	36 F	59 %	SW	20 mph	28 mph	30.04 in	0.0 in	Fair
2019-11-15	15:56:00	20:56:00	49 F	37 F	64 %	SW	17 mph	24 mph	30.03 in	0.0 in	Fair
2019-11-15	16:56:00	21:56:00	48 F	38 F	68 %	SW	12 mph	0 mph	30.05 in	0.0 in	Fair
2019-11-15	17:56:00	22:56:00	47 F	37 F	68 %	WSW	15 mph	0 mph	30.07 in	0.0 in	Fair
2019-11-15	18:56:00	23:56:00	48 F	33 F	56 %	W	12 mph	0 mph	30.08 in	0.0 in	Fair
2019-11-15	19:56:00	1900-01-01 00:56:00	48 F	30 F	50 %	W	13 mph	21 mph	30.08 in	0.0 in	Fair
2019-11-15	20:56:00	1900-01-01 01:56:00	47 F	30 F	52 %	WNW	18 mph	0 mph	30.09 in	0.0 in	Fair
2019-11-15	21:56:00	1900-01-01 02:56:00	45 F	32 F	60 %	WNW	21 mph	29 mph	30.14 in	0.0 in	Fair / Windy
2019-11-15	22:56:00	1900-01-01 03:56:00	44 F	28 F	53 %	NW	21 mph	29 mph	30.15 in	0.0 in	Fair / Windy
2019-11-15	23:56:00	1900-01-01 04:56:00	43 F	29 F	58 %	NW	18 mph	25 mph	30.16 in	0.0 in	Fair
2019-11-16	00:56:00	05:56:00	43 F	28 F	56 %	NNW	24 mph	31 mph	30.18 in	0.0 in	Mostly Cloudy / Windy
2019-11-16	01:56:00	06:56:00	39 F	27 F	62 %	NNW	30 mph	39 mph	30.22 in	0.0 in	Fair / Windy
2019-11-16	02:56:00	07:56:00	37 F	20 F	50 %	NNW	25 mph	37 mph	30.26 in	0.0 in	Fair / Windy
2019-11-16	03:56:00	08:56:00	35 F	16 F	46 %	N	24 mph	37 mph	30.29 in	0.0 in	Fair / Windy
2019-11-16	04:56:00	09:56:00	34 F	17 F	50 %	N	25 mph	35 mph	30.33 in	0.0 in	Fair / Windy
2019-11-16	05:56:00	10:56:00	33 F	18 F	54 %	N	25 mph	32 mph	30.36 in	0.0 in	Fair / Windy
2019-11-16	06:56:00	11:56:00	32 F	17 F	54 %	NNE	24 mph	33 mph	30.41 in	0.0 in	Fair / Windy
2019-11-16	07:56:00	12:56:00	33 F	20 F	59 %	NNE	22 mph	30 mph	30.45 in	0.0 in	Fair / Windy
2019-11-16	08:56:00	13:56:00	34 F	19 F	54 %	N	23 mph	36 mph	30.45 in	0.0 in	Fair / Windy
2019-11-16	09:56:00	14:56:00	34 F	22 F	61 %	N	22 mph	32 mph	30.46 in	0.0 in	Fair / Windy
2019-11-16	10:56:00	15:56:00	34 F	21 F	59 %	NNE	22 mph	31 mph	30.45 in	0.0 in	Light Rain / Windy
2019-11-16	11:56:00	16:56:00	35 F	21 F	57 %	NNE	21 mph	30 mph	30.45 in	0.0 in	Fair / Windy
2019-11-16	12:56:00	17:56:00	36 F	20 F	52 %	NNE	18 mph	26 mph	30.44 in	0.0 in	Fair
2019-11-16	13:56:00	18:56:00	36 F	20 F	52 %	N	18 mph	26 mph	30.44 in	0.0 in	Fair
2019-11-16	14:56:00	19:56:00	36 F	18 F	48 %	NNE	20 mph	26 mph	30.43 in	0.0 in	Fair
2019-11-16	15:56:00	20:56:00	35 F	18 F	50 %	N	16 mph	25 mph	30.44 in	0.0 in	Fair
2019-11-16	16:56:00	21:56:00	35 F	14 F	42 %	N	15 mph	23 mph	30.45 in	0.0 in	Fair
2019-11-16	17:56:00	22:56:00	35 F	17 F	48 %	NNE	16 mph	22 mph	30.46 in	0.0 in	Fair
2019-11-16	18:56:00	23:56:00	35 F	18 F	50 %	NE	16 mph	21 mph	30.47 in	0.0 in	Fair
2019-11-16	19:56:00	1900-01-01 00:56:00	35 F	19 F	52 %	NE	14 mph	0 mph	30.48 in	0.0 in	Fair
2019-11-16	20:56:00	1900-01-01 01:56:00	36 F	21 F	55 %	NE	13 mph	20 mph	30.47 in	0.0 in	Fair
2019-11-16	21:56:00	1900-01-01 02:56:00	36 F	21 F	55 %	ENE	14 mph	0 mph	30.46 in	0.0 in	Fair
2019-11-16	22:56:00	1900-01-01 03:56:00	37 F	21 F	52 %	ENE	13 mph	20 mph	30.47 in	0.0 in	Fair
2019-11-16	23:56:00	1900-01-01 04:56:00	37 F	21 F	52 %	ENE	12 mph	0 mph	30.46 in	0.0 in	Fair

## Sheet: 19November
Date	Time (EST)	Time (GMT)	Air Temperature	Dew Point	Humidity	Wind Direction	Wind Speed	Wind Gust	Pressure	Precip.	Condition
2019-11-19	00:56:00	05:56:00	43 F	42 F	97 %	N	15 mph	0 mph	29.65 in	0.0 in	Cloudy
2019-11-19	01:56:00	06:56:00	43 F	42 F	97 %	NNW	14 mph	0 mph	29.66 in	0.0 in	Cloudy
2019-11-19	02:56:00	07:56:00	42 F	41 F	96 %	NNW	12 mph	0 mph	29.67 in	0.0 in	Cloudy
2019-11-19	03:56:00	08:56:00	43 F	41 F	93 %	N	7 mph	0 mph	29.69 in	0.0 in	Cloudy
2019-11-19	04:56:00	09:56:00	43 F	41 F	93 %	NNW	6 mph	0 mph	29.71 in	0.0 in	Cloudy
2019-11-19	05:56:00	10:56:00	43 F	41 F	93 %	NW	6 mph	0 mph	29.72 in	0.0 in	Light Rain
2019-11-19	06:56:00	11:56:00	43 F	42 F	97 %	NNW	6 mph	0 mph	29.73 in	0.0 in	Cloudy
2019-11-19	07:56:00	12:56:00	43 F	42 F	97 %	NW	6 mph	0 mph	29.75 in	0.0 in	Cloudy
2019-11-19	08:56:00	13:56:00	44 F	43 F	96 %	W	5 mph	0 mph	29.75 in	0.0 in	Cloudy
2019-11-19	09:56:00	14:56:00	45 F	43 F	93 %	SW	6 mph	0 mph	29.75 in	0.0 in	Cloudy
2019-11-19	10:56:00	15:56:00	46 F	43 F	89 %	WSW	6 mph	0 mph	29.74 in	0.0 in	Cloudy
2019-11-19	11:56:00	16:56:00	45 F	43 F	93 %	WSW	6 mph	0 mph	29.74 in	0.0 in	Cloudy
2019-11-19	12:56:00	17:56:00	45 F	43 F	93 %	WSW	6 mph	0 mph	29.75 in	0.0 in	Cloudy
2019-11-19	13:56:00	18:56:00	45 F	44 F	97 %	W	6 mph	0 mph	29.74 in	0.0 in	Cloudy
2019-11-19	14:56:00	19:56:00	46 F	43 F	89 %	WSW	6 mph	0 mph	29.76 in	0.0 in	Cloudy
2019-11-19	15:56:00	20:56:00	46 F	42 F	86 %	WNW	8 mph	0 mph	29.78 in	0.0 in	Cloudy
2019-11-19	16:56:00	21:56:00	46 F	42 F	86 %	NW	6 mph	0 mph	29.81 in	0.0 in	Cloudy
2019-11-19	17:56:00	22:56:00	45 F	42 F	90 %	NNW	7 mph	0 mph	29.82 in	0.0 in	Cloudy
2019-11-19	18:56:00	23:56:00	45 F	41 F	86 %	N	7 mph	0 mph	29.83 in	0.0 in	Cloudy
2019-11-19	19:56:00	1900-01-01 00:56:00	45 F	40 F	82 %	NNE	8 mph	0 mph	29.85 in	0.0 in	Cloudy
2019-11-19	20:56:00	1900-01-01 01:56:00	44 F	40 F	85 %	N	9 mph	0 mph	29.84 in	0.0 in	Cloudy
2019-11-19	21:56:00	1900-01-01 02:56:00	44 F	39 F	82 %	N	9 mph	0 mph	29.84 in	0.0 in	Cloudy
2019-11-19	22:56:00	1900-01-01 03:56:00	44 F	38 F	79 %	NNW	7 mph	0 mph	29.84 in	0.0 in	Cloudy
2019-11-19	23:56:00	1900-01-01 04:56:00	44 F	38 F	79 %	NNE	10 mph	0 mph	29.81 in	0.0 in	Cloudy
2019-11-20	00:56:00	05:56:00	43 F	38 F	82 %	ENE	5 mph	0 mph	29.81 in	0.0 in	Mostly Cloudy
2019-11-20	01:56:00	06:56:00	44 F	39 F	82 %	N	6 mph	0 mph	29.80 in	0.0 in	Cloudy
2019-11-20	02:56:00	07:56:00	45 F	40 F	82 %	NE	9 mph	0 mph	29.80 in	0.0 in	Cloudy
2019-11-20	03:56:00	08:56:00	45 F	40 F	82 %	NE	14 mph	0 mph	29.81 in	0.0 in	Cloudy
2019-11-20	04:56:00	09:56:00	43 F	40 F	89 %	NE	15 mph	23 mph	29.82 in	0.0 in	Cloudy
2019-11-20	05:56:00	10:56:00	43 F	40 F	89 %	NNE	17 mph	23 mph	29.83 in	0.0 in	Light Rain
2019-11-20	06:56:00	11:56:00	43 F	39 F	86 %	NNE	13 mph	0 mph	29.83 in	0.0 in	Cloudy
2019-11-20	07:56:00	12:56:00	44 F	38 F	79 %	NNE	12 mph	0 mph	29.84 in	0.0 in	Cloudy
2019-11-20	08:56:00	13:56:00	43 F	39 F	86 %	N	9 mph	0 mph	29.85 in	0.0 in	Cloudy
2019-11-20	09:56:00	14:56:00	42 F	40 F	92 %	NNE	12 mph	0 mph	29.86 in	0.0 in	Cloudy
2019-11-20	10:56:00	15:56:00	42 F	39 F	89 %	N	15 mph	20 mph	29.84 in	0.0 in	Light Rain
2019-11-20	11:56:00	16:56:00	42 F	40 F	92 %	N	17 mph	22 mph	29.84 in	0.0 in	Cloudy
2019-11-20	12:56:00	17:56:00	41 F	39 F	93 %	N	17 mph	25 mph	29.85 in	0.0 in	Light Rain
2019-11-20	13:56:00	18:56:00	40 F	37 F	89 %	N	16 mph	23 mph	29.85 in	0.0 in	Light Rain
2019-11-20	14:56:00	19:56:00	39 F	37 F	93 %	N	15 mph	22 mph	29.86 in	0.0 in	Light Rain
2019-11-20	15:56:00	20:56:00	40 F	37 F	89 %	N	18 mph	23 mph	29.88 in	0.0 in	Light Rain
2019-11-20	16:56:00	21:56:00	40 F	38 F	93 %	NNW	15 mph	22 mph	29.89 in	0.0 in	Light Rain
2019-11-20	17:56:00	22:56:00	40 F	38 F	93 %	N	15 mph	24 mph	29.90 in	0.0 in	Light Rain
2019-11-20	18:56:00	23:56:00	41 F	38 F	89 %	N	17 mph	22 mph	29.91 in	0.0 in	Light Rain
2019-11-20	19:56:00	1900-01-01 00:56:00	41 F	38 F	89 %	N	16 mph	25 mph	29.93 in	0.0 in	Light Rain
2019-11-20	20:56:00	1900-01-01 01:56:00	41 F	38 F	89 %	N	18 mph	25 mph	29.94 in	0.0 in	Light Rain
2019-11-20	21:56:00	1900-01-01 02:56:00	41 F	38 F	89 %	N	18 mph	24 mph	29.94 in	0.0 in	Light Rain
2019-11-20	22:56:00	1900-01-01 03:56:00	41 F	38 F	89 %	N	18 mph	26 mph	29.95 in	0.0 in	Light Rain
2019-11-20	23:56:00	1900-01-01 04:56:00	41 F	38 F	89 %	N	21 mph	30 mph	29.95 in	0.0 in	Cloudy / Windy

## Sheet: 23November
Date	Time (EST)	Time (GMT)	Air Temperature	Dew Point	Humidity	Wind Direction	Wind Speed	Wind Gust	Pressure	Precip.	Condition		Convert time to GMT
2019-11-23	00:56:00	05:56:00	39 F	25 F	57 %	WNW	22 mph	29 mph	29.81 in	0.0 in	Fair / Windy
2019-11-23	01:56:00	06:56:00	38 F	21 F	51 %	WNW	24 mph	32 mph	29.84 in	0.0 in	Fair / Windy
2019-11-23	02:56:00	07:56:00	37 F	22 F	54 %	WNW	21 mph	26 mph	29.86 in	0.0 in	Fair / Windy
2019-11-23	03:56:00	08:56:00	36 F	21 F	55 %	WNW	18 mph	26 mph	29.88 in	0.0 in	Fair
2019-11-23	04:56:00	09:56:00	36 F	21 F	55 %	WNW	16 mph	25 mph	29.89 in	0.0 in	Fair		*EST=GMT -5
2019-11-23	05:56:00	10:56:00	36 F	23 F	59 %	WNW	16 mph	24 mph	29.91 in	0.0 in	Fair
2019-11-23	06:56:00	11:56:00	36 F	21 F	55 %	NW	17 mph	26 mph	29.93 in	0.0 in	Fair
2019-11-23	07:56:00	12:56:00	37 F	21 F	52 %	NW	22 mph	28 mph	29.92 in	0.0 in	Fair / Windy
2019-11-23	08:56:00	13:56:00	38 F	20 F	48 %	WNW	17 mph	24 mph	29.94 in	0.0 in	Fair
2019-11-23	09:56:00	14:56:00	39 F	21 F	49 %	W	15 mph	0 mph	29.95 in	0.0 in	Fair
2019-11-23	10:56:00	15:56:00	40 F	20 F	45 %	WNW	15 mph	0 mph	29.93 in	0.0 in	Fair
2019-11-23	11:56:00	16:56:00	42 F	20 F	41 %	W	14 mph	0 mph	29.91 in	0.0 in	Fair
2019-11-23	12:56:00	17:56:00	42 F	20 F	41 %	WSW	15 mph	0 mph	29.90 in	0.0 in	Fair
2019-11-23	13:56:00	18:56:00	44 F	21 F	40 %	WSW	13 mph	0 mph	29.88 in	0.0 in	Fair
2019-11-23	14:56:00	19:56:00	44 F	23 F	43 %	WSW	12 mph	0 mph	29.90 in	0.0 in	Fair
2019-11-23	15:56:00	20:56:00	42 F	24 F	49 %	WSW	8 mph	0 mph	29.88 in	0.0 in	Fair
2019-11-23	16:56:00	21:56:00	41 F	22 F	47 %	WSW	9 mph	0 mph	29.88 in	0.0 in	Fair
2019-11-23	17:56:00	22:56:00	42 F	25 F	51 %	SW	9 mph	0 mph	29.89 in	0.0 in	Fair
2019-11-23	18:56:00	23:56:00	41 F	26 F	55 %	SW	9 mph	0 mph	29.89 in	0.0 in	Fair
2019-11-23	19:56:00	1900-01-01 00:56:00	43 F	28 F	56 %	WSW	13 mph	0 mph	29.87 in	0.0 in	Fair
2019-11-23	20:56:00	1900-01-01 01:56:00	41 F	28 F	60 %	WSW	9 mph	0 mph	29.85 in	0.0 in	Fair
2019-11-23	21:56:00	1900-01-01 02:56:00	42 F	29 F	60 %	SW	12 mph	0 mph	29.84 in	0.0 in	Fair
2019-11-23	22:56:00	1900-01-01 03:56:00	42 F	30 F	62 %	SSW	7 mph	0 mph	29.82 in	0.0 in	Fair
2019-11-23	23:56:00	1900-01-01 04:56:00	42 F	33 F	70 %	SSW	6 mph	0 mph	29.79 in	0.0 in	Fair
2019-11-24	00:56:00	05:56:00	42 F	34 F	73 %	S	5 mph	0 mph	29.76 in	0.0 in	Fair
2019-11-24	01:56:00	06:56:00	44 F	37 F	76 %	SSE	5 mph	0 mph	29.75 in	0.0 in	Cloudy
2019-11-24	02:56:00	07:56:00	44 F	40 F	85 %	SE	6 mph	0 mph	29.71 in	0.0 in	Cloudy
2019-11-24	03:56:00	08:56:00	44 F	42 F	93 %	SSE	3 mph	0 mph	29.71 in	0.0 in	Light Rain
2019-11-24	04:56:00	09:56:00	44 F	43 F	96 %	ESE	5 mph	0 mph	29.67 in	0.0 in	Light Rain
2019-11-24	05:56:00	10:56:00	44 F	43 F	96 %	E	7 mph	0 mph	29.61 in	0.0 in	Light Rain
2019-11-24	06:56:00	11:56:00	46 F	45 F	96 %	E	12 mph	0 mph	29.57 in	0.0 in	Light Rain
2019-11-24	07:56:00	12:56:00	46 F	45 F	96 %	E	16 mph	23 mph	29.52 in	0.0 in	Light Rain
2019-11-24	08:56:00	13:56:00	48 F	47 F	96 %	E	16 mph	25 mph	29.47 in	0.0 in	Light Rain
2019-11-24	09:56:00	14:56:00	49 F	48 F	97 %	E	20 mph	28 mph	29.42 in	0.0 in	Light Rain
2019-11-24	10:56:00	15:56:00	50 F	49 F	96 %	E	15 mph	21 mph	29.32 in	0.0 in	Light Rain
2019-11-24	11:56:00	16:56:00	51 F	51 F	100 %	E	12 mph	0 mph	29.21 in	0.0 in	Light Rain
2019-11-24	12:56:00	17:56:00	55 F	54 F	96 %	E	21 mph	28 mph	29.10 in	0.0 in	Light Rain / Windy
2019-11-24	13:56:00	18:56:00	56 F	55 F	97 %	ESE	21 mph	31 mph	29.03 in	0.0 in	Light Rain / Windy
2019-11-24	14:56:00	19:56:00	56 F	55 F	97 %	S	18 mph	24 mph	29.01 in	0.0 in	Mostly Cloudy
2019-11-24	15:56:00	20:56:00	54 F	52 F	93 %	SSW	15 mph	0 mph	29.00 in	0.0 in	Cloudy
2019-11-24	16:56:00	21:56:00	49 F	49 F	100 %	SSW	13 mph	0 mph	29.00 in	0.0 in	Light Rain
2019-11-24	17:56:00	22:56:00	47 F	47 F	100 %	W	18 mph	23 mph	28.98 in	0.0 in	Cloudy
2019-11-24	18:56:00	23:56:00	44 F	43 F	96 %	WNW	33 mph	44 mph	29.00 in	0.0 in	Cloudy / Windy
2019-11-24	19:56:00	1900-01-01 00:56:00	43 F	42 F	97 %	NW	35 mph	47 mph	29.04 in	0.0 in	Light Rain / Windy
2019-11-24	20:56:00	1900-01-01 01:56:00	41 F	40 F	96 %	NW	35 mph	46 mph	29.13 in	0.0 in	Light Rain / Windy
2019-11-24	21:56:00	1900-01-01 02:56:00	42 F	40 F	92 %	NW	33 mph	44 mph	29.19 in	0.0 in	Light Rain / Windy
2019-11-24	22:56:00	1900-01-01 03:56:00	43 F	40 F	89 %	WNW	28 mph	39 mph	29.25 in	0.0 in	Cloudy / Windy
2019-11-24	23:56:00	1900-01-01 04:56:00	43 F	39 F	86 %	WNW	30 mph	41 mph	29.31 in	0.0 in	Cloudy / Windy

## Sheet: 26November
Date	Time (EST)	Time (GMT)	Air Temperature	Dew Point	Humidity	Wind Direction	Wind Speed	Wind Gust	Pressure	Precip.	Condition
2019-11-26	00:56:00	05:56:00	43 F	39 F	86 %	WSW	7 mph	0 mph	29.92 in	0.0 in	Fair
2019-11-26	01:56:00	06:56:00	43 F	39 F	86 %	SSW	5 mph	0 mph	29.95 in	0.0 in	Fair
2019-11-26	02:56:00	07:56:00	42 F	39 F	89 %	SSW	7 mph	0 mph	29.96 in	0.0 in	Fair
2019-11-26	03:56:00	08:56:00	42 F	39 F	89 %	SSW	6 mph	0 mph	29.96 in	0.0 in	Fair		*EST=GMT -5
2019-11-26	04:56:00	09:56:00	44 F	42 F	93 %	SSW	8 mph	0 mph	29.97 in	0.0 in	Fair
2019-11-26	05:56:00	10:56:00	45 F	43 F	93 %	SSW	7 mph	0 mph	29.98 in	0.0 in	Fair
2019-11-26	06:56:00	11:56:00	45 F	43 F	93 %	SW	9 mph	0 mph	29.98 in	0.0 in	Fair
2019-11-26	07:56:00	12:56:00	48 F	44 F	86 %	SW	9 mph	0 mph	29.99 in	0.0 in	Fair
2019-11-26	08:56:00	13:56:00	50 F	45 F	83 %	SSW	9 mph	0 mph	30.00 in	0.0 in	Fair
2019-11-26	09:56:00	14:56:00	52 F	46 F	80 %	SSW	10 mph	0 mph	30.01 in	0.0 in	Fair
2019-11-26	10:56:00	15:56:00	54 F	46 F	75 %	SSW	14 mph	0 mph	30.00 in	0.0 in	Fair
2019-11-26	11:56:00	16:56:00	55 F	45 F	69 %	SW	18 mph	0 mph	29.99 in	0.0 in	Fair
2019-11-26	12:56:00	17:56:00	55 F	46 F	72 %	SSW	18 mph	24 mph	29.98 in	0.0 in	Fair
2019-11-26	13:56:00	18:56:00	55 F	46 F	72 %	SSW	20 mph	25 mph	29.95 in	0.0 in	Fair
2019-11-26	14:56:00	19:56:00	54 F	48 F	80 %	SSW	18 mph	23 mph	29.96 in	0.0 in	Fair
2019-11-26	15:56:00	20:56:00	52 F	48 F	86 %	SSW	16 mph	25 mph	29.96 in	0.0 in	Fair
2019-11-26	16:56:00	21:56:00	51 F	48 F	89 %	SW	17 mph	0 mph	29.97 in	0.0 in	Fair
2019-11-26	17:56:00	22:56:00	50 F	47 F	89 %	SW	17 mph	0 mph	29.98 in	0.0 in	Fair
2019-11-26	18:56:00	23:56:00	50 F	47 F	89 %	SW	15 mph	0 mph	30.00 in	0.0 in	Fair
2019-11-26	19:56:00	1900-01-01 00:56:00	49 F	46 F	90 %	WSW	13 mph	0 mph	30.02 in	0.0 in	Fair
2019-11-26	20:56:00	1900-01-01 01:56:00	48 F	45 F	89 %	SW	9 mph	0 mph	30.04 in	0.0 in	Fair
2019-11-26	21:56:00	1900-01-01 02:56:00	47 F	45 F	93 %	SW	10 mph	0 mph	30.04 in	0.0 in	Fair
2019-11-26	22:56:00	1900-01-01 03:56:00	47 F	45 F	93 %	SW	9 mph	0 mph	30.05 in	0.0 in	Fair
2019-11-26	23:56:00	1900-01-01 04:56:00	46 F	44 F	93 %	SW	7 mph	0 mph	30.05 in	0.0 in	Fair
2019-11-27	00:56:00	05:56:00	46 F	44 F	93 %	W	7 mph	0 mph	30.05 in	0.0 in	Fair
2019-11-27	01:56:00	06:56:00	42 F	42 F	100 %	CALM	0 mph	0 mph	30.07 in	0.0 in	Fair
2019-11-27	02:56:00	07:56:00	38 F	37 F	97 %	CALM	0 mph	0 mph	30.07 in	0.0 in	Fair
2019-11-27	03:56:00	08:56:00	36 F	35 F	97 %	SW	3 mph	0 mph	30.08 in	0.0 in	Fair
2019-11-27	04:56:00	09:56:00	35 F	34 F	96 %	S	3 mph	0 mph	30.07 in	0.0 in	Fair
2019-11-27	05:56:00	10:56:00	32 F	32 F	100 %	CALM	0 mph	0 mph	30.08 in	0.0 in	Fair
2019-11-27	06:56:00	11:56:00	33 F	32 F	96 %	SE	3 mph	0 mph	30.07 in	0.0 in	Fog
2019-11-27	07:56:00	12:56:00	38 F	38 F	100 %	ESE	3 mph	0 mph	30.06 in	0.0 in	Fog
2019-11-27	08:56:00	13:56:00	48 F	47 F	96 %	CALM	0 mph	0 mph	30.06 in	0.0 in	Fair
2019-11-27	09:56:00	14:56:00	51 F	46 F	83 %	ESE	5 mph	0 mph	30.04 in	0.0 in	Fair
2019-11-27	10:56:00	15:56:00	51 F	45 F	80 %	ESE	7 mph	0 mph	29.98 in	0.0 in	Fair
2019-11-27	11:56:00	16:56:00	51 F	47 F	86 %	ESE	7 mph	0 mph	29.94 in	0.0 in	Cloudy
2019-11-27	12:56:00	17:56:00	52 F	49 F	89 %	SE	6 mph	0 mph	29.92 in	0.0 in	Cloudy
2019-11-27	13:56:00	18:56:00	52 F	50 F	93 %	SE	7 mph	0 mph	29.87 in	0.0 in	Cloudy
2019-11-27	14:56:00	19:56:00	53 F	50 F	89 %	E	6 mph	0 mph	29.81 in	0.0 in	Light Rain
2019-11-27	15:56:00	20:56:00	51 F	50 F	96 %	E	7 mph	0 mph	29.77 in	0.0 in	Cloudy
2019-11-27	16:56:00	21:56:00	53 F	52 F	96 %	SSE	8 mph	0 mph	29.72 in	0.0 in	Cloudy
2019-11-27	17:56:00	22:56:00	54 F	54 F	100 %	S	9 mph	0 mph	29.66 in	0.0 in	Fog
2019-11-27	18:56:00	23:56:00	54 F	53 F	97 %	SSE	9 mph	0 mph	29.60 in	0.0 in	Cloudy
2019-11-27	19:56:00	1900-01-01 00:56:00	53 F	52 F	96 %	SSW	14 mph	18 mph	29.56 in	0.0 in	Light Rain
2019-11-27	20:56:00	1900-01-01 01:56:00	51 F	51 F	100 %	SSW	10 mph	0 mph	29.50 in	0.0 in	Light Rain
2019-11-27	21:56:00	1900-01-01 02:56:00	52 F	51 F	97 %	WSW	13 mph	0 mph	29.48 in	0.0 in	Cloudy
2019-11-27	22:56:00	1900-01-01 03:56:00	51 F	49 F	92 %	WSW	16 mph	0 mph	29.46 in	0.0 in	Mostly Cloudy
2019-11-27	23:56:00	1900-01-01 04:56:00	50 F	49 F	96 %	WSW	10 mph	0 mph	29.45 in	0.0 in	Fair
