# Supplementary material for: Developing bottom drifters to better understand the stranding locations of cold-stunned sea turtles in Cape Cod Bay, Massachusetts
Source: PeerJ. 2023 Aug 30;11:e15866. doi: 10.7717/peerj.15866 (PMC10474834; doi:10.7717/peerj.15866)
Supplement: Supplemental Information 22 — This buoy is located north of the drifter deployment site north of Provincetown, Massachusetts. The data was used to estimate wind speed around the time of the drifter deployments. [file peerj-11-15866-s022.xlsx]

## Sheet: 2019_Station44018
Station44018h2019
#YY	MM	DD	hh	mm	WDIR	WSPD	GST	WVHT	DPD	APD	MWD	PRES	ATMP		Desplayed in UTC
#yr	mo	dy	hr	mn	degT	m/s	m/s	m	sec	sec	degT	hPa	degC
2019	10	31	0	46	119	8.2	9.6	1.09	8.33	5.41	96	1022.8	13.1
2019	10	31	1	50	132	7.9	9.3	1.08	10.81	5.02	100	1022.1	13
2019	10	31	2	50	132	7.3	8.3	0.89	10	4.83	80	1021.3	13.4
2019	10	31	3	50	140	7.7	8.4	1.05	12.12	5.27	100	1020.3	13.4
2019	10	31	4	50	150	5.6	6.4	1.11	10	5.12	108	1019.8	13.5
2019	10	31	5	50	173	6.1	6.8	1.18	10.81	5.65	100	1019.5	14.6
2019	10	31	6	50	174	4.8	5.7	1.18	10	5.79	95	1018.6	14.1
2019	10	31	7	50	175	6.1	6.8	1.17	12.12	6.25	83	1018.2	14.3
2019	10	31	8	50	185	5.8	6.5	1.08	12.12	6.33	78	1018.2	14.6
2019	10	31	9	50	172	6	6.6	1.15	12.9	6.81	81	1018	14.2
2019	10	31	10	50	171	6.1	6.9	1.21	12.12	6.92	89	1017.5	14.2
2019	10	31	11	50	177	7.3	8.5	1.2	12.12	6.24	77	1017	14.7
2019	10	31	12	50	170	8.9	10.3	1.27	10	5.54	91	1016.2	14.8
2019	10	31	13	50	176	11	12.9	1.25	12.12	4.67	91	1015.4	15.4
2019	10	31	14	50	180	11.4	13.2	1.34	4.76	4.62	125	1014.8	15.9
2019	10	31	15	50	182	11.7	13.6	1.52	4.55	4.77	163	1014	16.2
2019	10	31	16	50	186	11.4	13.3	1.43	12.12	4.8	125	1012.9	16.7
2019	10	31	17	50	184	10.9	12.9	1.52	4.35	4.67	189	1012.1	16.7
2019	10	31	18	50	186	12	13.7	1.61	4.17	4.65	180	1011.4	16.6
2019	10	31	19	50	183	11.9	13.9	1.6	12.9	4.79	72	1010.9	16.6
2019	10	31	20	50	188	11.2	13.2	1.66	7.14	4.79	107	1010.3	16.6
2019	10	31	21	50	182	11.3	13.2	1.79	7.69	5.3	98	1009.6	16.6
2019	10	31	22	50	183	12.2	14.9	1.81	7.14	5.39	103	1009	16.5
2019	10	31	23	50	186	13.3	17.4	1.89	7.14	5.28	109	1008.7	17
2019	11	1	0	50	185	13.1	16.2	1.88	6.25	5.21	123	1007.9	17
2019	11	1	1	50	182	14.1	17.2	1.81	6.67	5.13	120	1006.5	17.3
2019	11	1	2	50	178	13.5	16.6	2.03	5.88	5.16	137	1005.4	17.3
2019	11	1	3	50	183	14.3	17.8	2.06	4.76	5	176	1004.8	17.5
2019	11	1	4	50	183	14.9	17.7	1.97	5	5.03	178	1003.5	17.3
2019	11	1	5	50	177	13.7	16.1	1.95	5	4.93	191	1002.5	17.2
2019	11	1	6	50	180	13.7	16.5	2.01	4.76	4.9	178	1001	17.5
2019	11	1	7	50	183	15.5	18.6	1.93	4.35	4.82	174	998.9	17.8
2019	11	1	8	50	182	16.6	21	2.26	4.55	4.94	173	997.6	17.9
2019	11	1	9	50	234	15.7	20.1	2.48	5.56	5.21	178	999.7	16
2019	11	1	10	50	231	14.2	17.8	2.08	5.88	5.03	184	1001.9	13.8
2019	11	1	11	50	236	15	18.4	1.91	5.56	4.69	212	1004.2	12.1
2019	11	1	12	50	240	14	16.8	2.18	5.56	5.04	243	1006.3	11.8
2019	11	1	13	50	247	12.1	14.8	2.04	5.56	5.04	258	1008	11.5
2019	11	1	14	50	250	11.9	14.4	2.21	5.88	5.28	269	1009.2	11.4
2019	11	1	15	50	245	10.6	13.2	2.14	6.25	5.4	282	1010.3	11.5
2019	11	1	16	50	255	9.3	11.7	2.04	5.88	5.35	283	1010.8	11.9
2019	11	1	17	50	252	9.4	12.1	2	5.56	5.34	268	1011.5	12.4
2019	11	1	18	50	257	9.5	11.1	1.75	5.56	4.98	282	1012.4	12.9
2019	11	1	19	50	270	9.9	11.4	1.75	5.26	5.03	277	1013.9	12.9
2019	11	1	20	50	278	10.8	13.6	1.73	12.12	4.8	84	1015.2	12.6
2019	11	1	21	50	283	12.2	14.3	1.82	12.9	4.89	105	1016.2	11.7
2019	11	1	22	50	280	11.9	13.6	1.85	5.56	4.85	302	1018.1	10.8
2019	11	1	23	50	284	12.5	14.8	1.73	5.26	4.72	306	1019.3	9.9
2019	11	2	0	50	279	11.6	14.6	1.67	5.26	4.85	317	1020.4	9.1
2019	11	2	1	50	282	10.7	12.8	1.57	5.26	4.78	299	1021	8.5
2019	11	2	2	50	287	10.2	12.9	1.39	5.88	4.75	289	1021.3	8.2
2019	11	2	3	50	283	9.8	12.2	1.27	5.26	4.64	286	1021	8
2019	11	2	4	50	292	9.5	12	1.25	5.26	4.73	291	1021.3	7.7
2019	11	2	5	50	299	9.7	12.7	1.3	5	4.69	287	1021.3	7.4
2019	11	2	6	50	310	9.2	12.1	1.33	4.76	4.67	294	1021.8	7.1
2019	11	2	7	50	315	8.3	10.5	1.32	4.76	4.73	303	1021.9	6.8
2019	11	2	8	50	324	6.5	8.6	1.3	4.55	4.45	315	1022.6	6.3
2019	11	2	9	50	326	4.9	6.6	1.21	10	4.78	102	1023	6.5
2019	11	2	10	50	5	3.2	4.9	1.1	10.81	4.75	90	1023	6.6
2019	11	2	11	50	32	1.6	3	1.04	10.81	4.95	104	1023.2	7.4
2019	11	2	12	50	322	0.8	1.5	0.87	10	5	108	1023.8	8.3
2019	11	2	13	50	95	1.1	2.1	0.8	10	5.22	97	1023.5	8.6
2019	11	2	14	50	177	1.2	2.2	0.74	10	5.38	91	1023.3	8.7
2019	11	2	15	50	253	2.5	4.2	0.7	10	6	77	1022.9	8.1
2019	11	2	16	50	269	2.3	3.1	0.69	10	5.98	105	1021.6	7.7
2019	11	2	17	50	233	2.1	2.9	0.75	12.9	5.57	72	1021	8
2019	11	2	18	50	234	1.6	2.7	0.77	12.12	5.73	90	1020.2	8.1
2019	11	2	19	50	154	1	1.8	0.74	12.9	5.71	95	1019.6	8.7
2019	11	2	20	50	117	1.7	2.5	0.79	12.12	6.16	76	1019.1	8.8
2019	11	2	21	50	149	1.5	2.4	0.75	12.12	6.2	96	1019	8.3
2019	11	2	22	50	173	2.7	3.5	0.77	12.12	6.38	88	1018.4	8.7
2019	11	2	23	50	173	3.8	5.5	0.75	10.81	6.56	91	1018	8.9
2019	11	3	0	50	194	5	6.2	0.71	10	6.24	84	1017.4	8.9
2019	11	3	1	50	197	4.5	5.7	0.65	12.12	5.23	86	1017.2	9.1
2019	11	3	2	50	215	4.7	6.3	0.61	9.09	5.02	99	1016.8	9.4
2019	11	3	3	50	235	5.1	6.4	0.63	9.09	5.17	119	1016.3	9.4
2019	11	3	4	50	252	5.2	6.1	0.57	9.09	4.86	87	1015.6	9.2
2019	11	3	5	50	260	7.2	8.8	0.64	9.09	4.68	101	1015.1	9.3
2019	11	3	6	50	282	6.8	8.3	0.7	12.12	4.36	76	1014.7	8.9
2019	11	3	7	50	298	9	10.4	0.78	3.85	4.29	272	1013.7	9
2019	11	3	8	50	293	8	9.3	1.09	4.17	4.12	291	1014.1	9
2019	11	3	9	50	282	7.5	9.3	1.1	4.35	4.08	294	1014.5	9
2019	11	3	10	50	285	6.9	8.7	0.86	4	3.81	293	1014.8	8.5
2019	11	3	11	50	290	6.5	7.7	0.78	3.7	3.75	295	1015.1	8.8
2019	11	3	12	50	278	5.5	6.9	0.69	10.81	3.86	92	1015.8	8.9
2019	11	3	13	50	277	5.6	6.7	0.67	8.33	4.05	114	1016.4	9.1
2019	11	3	14	50	270	6.3	7.6	0.65	7.69	3.84	108	1016.7	8.8
2019	11	3	15	50	271	6.1	7.3	0.64	3.57	3.88	297	1016.9	8.9
2019	11	3	16	50	265	5.2	6.3	0.62	4	3.92	289	1016.6	9.6
2019	11	3	17	50	263	4.9	5.8	0.6	3.85	3.91	291	1016.4	10
2019	11	3	18	50	278	3.6	4.4	0.55	3.85	4.09	293	1016.4	10.2
2019	11	3	19	50	261	2.9	3.8	0.52	3.85	4.02	295	1016.7	10.8
2019	11	3	20	50	250	4.2	7.3	0.6	3.45	4.13	297	1017.1	11.1
2019	11	3	21	50	271	7.2	9.3	0.78	3.7	3.69	296	1017.5	10.8
2019	11	3	22	50	277	7.8	9.4	0.78	3.7	3.6	289	1018.4	10.8
2019	11	3	23	50	288	9.4	10.9	0.95	3.85	3.55	287	1019.3	10.6
2019	11	4	0	50	290	8.7	11.2	1.06	4	3.72	289	1020	10.4
2019	11	4	1	50	290	9.4	11	1.01	4	3.65	294	1020.7	10.2
2019	11	4	2	50	287	10	12.7	1.12	4.35	3.83	303	1021.4	9.8
2019	11	4	3	50	284	8.7	10.4	1.02	4.76	3.94	297	1021.8	9.7
2019	11	4	4	50	290	9	10.9	1.04	4.55	4.03	300	1022.4	9.2
2019	11	4	5	50	293	9.2	11.1	1.08	4.55	4.11	296	1022.9	8.9
2019	11	4	6	50	296	8.8	10.1	1.11	4.76	4.35	295	1023.3	8.8
2019	11	4	7	50	291	9	11.3	1.2	5	4.27	296	1023.9	8
2019	11	4	8	50	289	8.4	10.2	1.05	4.76	4.09	293	1024.4	7.7
2019	11	4	9	50	295	6.9	8.3	1.03	5	3.95	295	1025.3	7.6
2019	11	4	10	50	298	7.1	8.3	1.01	4.55	3.95	300	1025.8	7.5
2019	11	4	11	50	306	6.7	8.4	0.93	4.35	3.76	306	1026.6	7.5
2019	11	4	12	50	301	6	7.4	0.85	4	3.74	313	1027.5	7.8
2019	11	4	13	50	289	3.9	5.5	0.76	4.17	3.77	312	1028.1	7.4
2019	11	4	14	50	283	3.4	4.9	0.64	3.7	3.67	301	1028.7	7.4
2019	11	4	15	50	258	2.9	3.9	0.51	3.85	3.85	315	1028.4	7.5
2019	11	4	16	50	260	4	5.4	0.47	3.45	3.83	315	1028.4	7.5
2019	11	4	17	50	232	3.1	4.1	0.39	3.7	3.79	316	1028.1	7.8
2019	11	4	18	50	192	3.2	4	0.37	8.33	4.07	116	1027.6	8.3
2019	11	4	19	50	196	3.6	4.7	0.36	10	4.47	79	1027.7	9.1
2019	11	4	20	50	170	5.1	6.2	0.32	8.33	4.46	103	1027.5	9.2
2019	11	4	21	50	188	6.5	7.7	0.35	7.69	4.03	125	1027.6	9.7
2019	11	4	22	50	199	7.9	9.2	0.44	2.6	3.18	211	1027.6	9.8
2019	11	4	23	50	209	7.9	9.4	0.64	3.45	3.3	224	1027.9	9.7
2019	11	5	0	50	201	8.2	10.1	0.76	3.85	3.44	224	1027.7	9.8
2019	11	5	1	50	198	7.8	9.3	0.66	3.7	3.39	224	1027.9	10
2019	11	5	2	50	182	7.2	8.6	0.6	3.13	3.41	216	1027.7	10.2
2019	11	5	3	50	180	8	9.2	0.54	3.33	3.46	192	1027.6	10.5
2019	11	5	4	50	159	6.8	8.4	0.6	3.13	3.25	169	1027.7	10.3
2019	11	5	5	50	163	7.6	9	0.53	3.23	3.39	152	1027.4	10.3
2019	11	5	6	50	161	7.4	9	0.59	3.23	3.45	147	1027	10.3
2019	11	5	7	50	153	9.1	10.9	0.7	3.85	3.4	135	1026.2	10.8
2019	11	5	8	50	149	9.5	11.3	0.78	3.57	3.43	139	1025.6	11.1
2019	11	5	9	50	144	9.9	11.6	0.86	4.17	3.54	135	1025.1	11.3
2019	11	5	10	50	146	10.8	12.4	0.93	4.35	3.68	136	1024.6	11.6
2019	11	5	11	50	160	9.6	11.7	1.04	4.76	3.85	129	1025.3	11.7
2019	11	5	12	50	165	7.7	9.4	0.97	5	4.01	127	1025.3	12
2019	11	5	13	50	169	6.3	7.4	1.01	5	3.89	122	1025.3	12.4
2019	11	5	14	50	173	4.7	5.2	0.8	5.26	4.11	118	1025	12.2
2019	11	5	15	50	162	3.5	4.2	0.7	4.76	4.3	120	1024.3	12.5
2019	11	5	16	50	170	3.6	4.2	0.58	5	4.24	114	1023	12.7
2019	11	5	17	50	163	4.4	5.4	0.63	5	4.43	121	1021.9	12.6
2019	11	5	18	50	138	7.5	8.5	0.66	5	4.22	116	1019.7	12.3
2019	11	5	19	50	163	5.8	9.3	0.74	4.76	3.79	124	1019.5	12.5
2019	11	5	20	50	171	4.6	6.4	0.72	4.55	3.67	127	1019.1	13
2019	11	5	21	50	186	4.9	5.8	0.61	4.55	3.71	120	1018.9	13
2019	11	5	22	50	185	5.9	6.9	0.62	4.35	3.74	132	1018.4	13.1
2019	11	5	23	50	198	5.1	5.6	0.61	4.76	3.84	118	1017.9	13.2
2019	11	6	0	50	210	4.4	4.9	0.64	9.09	4.28	116	1017.6	12.8
2019	11	6	1	50	224	3.8	4.3	0.66	5.26	4.88	110	1018.2	12.5
2019	11	6	2	50	253	3.9	4.6	0.72	5.88	5.37	114	1018.4	12.4
2019	11	6	3	50	265	7.3	9.3	0.76	6.25	5.21	113	1018.4	12.5
2019	11	6	4	50	294	9.9	12.7	0.84	5.88	3.75	115	1018.4	12.2
2019	11	6	5	50	294	8.6	10.3	0.99	3.85	3.87	280	1018.7	11.6
2019	11	6	6	50	285	10.7	13.1	1.04	4.17	3.98	292	1019.2	11.2
2019	11	6	7	50	284	10.7	12.7	1.25	4.76	4.27	286	1020.1	10.6
2019	11	6	8	50	289	10.5	12.4	1.4	5	4.47	284	1020.8	10.1
2019	11	6	9	50	297	9.6	11.3	1.48	5.26	4.55	299	1022	9.7
2019	11	6	10	50	292	9.4	11.2	1.19	5	4.18	301	1022.7	9.3
2019	11	6	11	50	281	9.7	11.3	1.16	4.76	4.08	298	1023.9	9
2019	11	6	12	50	265	8.1	9.8	1.18	4.55	4.1	293	1024.8	8.5
2019	11	6	13	50	272	10	12.2	1.22	4.35	3.97	303	1025.2	8.6
2019	11	6	14	50	281	9.5	11.7	1.32	4.55	4.06	296	1025.6	8.3
2019	11	6	15	50	283	7.3	8.8	1.21	5	3.99	298	1026.1	8.4
2019	11	6	16	50	277	8.4	10.5	0.94	4.76	3.82	290	1025.7	8.4
2019	11	6	17	50	261	7.5	9.4	0.9	4.35	3.87	295	1025.5	9
2019	11	6	18	50	264	6.9	8.8	0.79	4.76	3.97	278	1025.3	9.7
2019	11	6	19	50	255	6.9	8.8	0.74	4.35	4.11	280	1025.7	10.2
2019	11	6	20	50	261	6.3	8.2	0.74	4.55	4.03	284	1025.7	10.5
2019	11	6	21	50	257	5.6	7.1	0.73	4.35	4.22	288	1026	10.5
2019	11	6	22	50	258	4.8	6.7	0.73	8.33	4.14	117	1026.3	10.6
2019	11	6	23	50	266	7.2	8.2	0.74	9.09	4.09	113	1027	10.7
2019	11	7	0	50	268	7.2	8.7	0.77	8.33	3.85	113	1027.3	10.6
2019	11	7	1	50	275	5.8	6.9	0.78	8.33	3.69	107	1027.4	10.2
2019	11	7	2	50	279	4.9	5.9	0.72	7.69	3.88	106	1027.8	9.9
2019	11	7	3	50	253	5.3	6.4	0.68	7.69	4.31	113	1027.4	9.9
2019	11	7	4	50	224	4.1	5.2	0.59	7.14	4	105	1027.3	9.6
2019	11	7	5	50	201	4.3	4.8	0.57	7.69	4.53	106	1026.8	9.7
2019	11	7	6	50	197	5.5	6.6	0.47	7.14	4.33	117	1026.3	9.9
2019	11	7	7	50	210	6.9	8.4	0.46	8.33	4.43	106	1026	10.3
2019	11	7	8	50	205	6.3	7.4	0.46	8.33	3.83	103	1025.2	10.5
2019	11	7	9	50	194	7.3	8.6	0.51	7.69	3.91	104	1024.6	10.5
2019	11	7	10	50	210	8.2	9.7	0.53	3.85	3.76	234	1023.9	10.8
2019	11	7	11	50	203	7.3	8.7	0.58	3.7	3.75	227	1023.4	10.9
2019	11	7	12	50	196	8.5	10	0.66	3.7	3.57	232	1022.9	11.1
2019	11	7	13	50	197	8	9.2	0.65	3.13	3.5	221	1021.9	11.4
2019	11	7	14	50	195	9.7	11.7	0.64	8.33	3.42	87	1020.6	12
2019	11	7	15	50	204	9	10.5	0.78	3.45	3.5	218	1020.3	12.3
2019	11	7	16	50	213	9.3	12	0.74	3.33	3.42	216	1019.7	12.5
2019	11	7	17	50	213	8.4	9.9	0.79	3.57	3.56	199	1017.9	12.6
2019	11	7	18	50	214	7.3	8.5	0.82	4.17	3.75	189	1017.1	12.6
2019	11	7	19	50	209	6.9	8.4	0.71	4.55	3.87	203	1016.3	12.5
2019	11	7	20	50	207	7.3	8.6	0.67	4.55	3.88	203	1015.5	12.5
2019	11	7	21	50	200	8	9.4	0.65	4	3.8	202	1014.4	12.6
2019	11	7	22	50	215	6.8	8.1	0.67	4	3.83	208	1014	12.5
2019	11	7	23	50	240	6	7.3	0.62	3.85	3.95	223	1013.6	12.1
2019	11	8	0	46	309	8.3	9.4	0.58	8.33	3.67	149	1013.7	9.5
2019	11	8	1	50	303	8.8	10.8	0.76	3.03	3.52	304	1013.5	8.8
2019	11	8	2	50	335	7.9	9.4	0.94	3.85	3.69	326	1013	7.3
2019	11	8	3	50	327	5.5	6.9	1.14	4.17	3.99	333	1012.6	7.1
2019	11	8	4	50	312	9.7	11.2	1.07	4.55	3.95	342	1012.1	7.2
2019	11	8	5	50	331	10.8	12.8	1.18	4.17	3.87	331	1011.8	6.5
2019	11	8	6	50	325	10.6	12.7	1.3	4.76	4.03	339	1011.6	6.5
2019	11	8	7	50	349	10.9	13	1.35	5	4.19	347	1011.7	5.5
2019	11	8	8	50	347	10.9	12.9	1.5	5.26	4.37	337	1011.6	5.3
2019	11	8	9	50	320	13.6	15.9	1.7	5.26	4.61	338	1011.8	3.6
2019	11	8	10	50	311	12.6	15.6	2.05	6.25	5.06	352	1012.2	3.3
2019	11	8	11	50	312	11.5	13.8	2.15	5.56	4.93	339	1012.8	2.4
2019	11	8	12	50	309	10.7	12.9	1.95	5.88	4.95	354	1013.4	2
2019	11	8	13	50	300	11.5	14.4	2.02	5.88	4.84	5	1013.3	1.7
2019	11	8	14	50	309	11.7	14.7	2.11	5.88	4.91	2	1013.7	1.3
2019	11	8	15	50	308	10.4	13.3	2.09	5.26	4.85	324	1014.2	1.5
2019	11	8	16	50	298	11.1	13.9	1.81	5.26	4.7	327	1013.8	1.8
2019	11	8	17	50	309	12.3	15.3	2.01	5.26	4.72	330	1013.9	2
2019	11	8	18	50	308	13.9	17.7	1.99	5.56	4.73	340	1014	2
2019	11	8	19	50	303	14.4	18.6	2.37	5.56	4.95	318	1014.9	1.8
2019	11	8	20	50	313	14.2	17.8	2.29	6.25	5.14	333	1016	1.8
2019	11	8	21	50	307	14.5	18.9	2.32	6.25	5.27	327	1016.8	1.9
2019	11	8	22	50	314	13.6	17.5	2.58	6.67	5.31	323	1018	1.6
2019	11	8	23	50	318	13.2	17.2	2.68	6.67	5.51	327	1018.9	1.5
2019	11	9	0	50	315	13.2	16.8	2.33	6.67	5.31	347	1019.6	1.4
2019	11	9	1	50	309	12	15.4	2.44	7.14	5.25	359	1020.4	1
2019	11	9	2	50	304	12.1	15.7	2.34	6.67	5.21	356	1021	0.7
2019	11	9	3	50	306	12	15.8	2.04	6.67	4.89	1	1021.5	0.8
2019	11	9	4	50	312	10.6	13.9	1.85	6.25	4.75	5	1022.4	0.7
2019	11	9	5	50	305	9.7	12.1	1.81	5.26	4.55	319	1023.1	0.7
2019	11	9	6	50	314	9.4	12	1.5	5.56	4.48	352	1023.5	0.6
2019	11	9	7	50	304	6.6	8.8	1.38	6.25	4.35	7	1024.2	0.5
2019	11	9	8	50	307	6.3	9	1.18	5.26	4.4	327	1024.3	0.6
2019	11	9	9	50	320	6.1	8.3	1.07	5	4.44	308	1024.7	0.5
2019	11	9	10	50	290	4.8	6.3	1.05	4.76	4.57	313	1025.3	0.5
2019	11	9	11	50	304	3.9	6	1.07	4.76	4.64	309	1026.1	0.3
2019	11	9	12	50	286	2.7	4.5	0.91	5.88	4.47	7	1026.6	0.4
2019	11	9	13	50	264	2.4	3.6	0.89	5.56	4.33	10	1026.9	0.5
2019	11	9	14	50	295	3.6	5.2	0.81	5.56	4.28	25	1026.5	0.5
2019	11	9	15	50	234	3.9	5.9	0.76	5	4.23	28	1026.4	0.9
2019	11	9	16	50	231	4.4	6.4	0.7	6.67	4.26	52	1025.8	1
2019	11	9	17	50	209	4.8	7.3	0.65	7.14	4.37	50	1025.2	1.6
2019	11	9	18	50	214	4.8	7	0.64	7.14	4.32	56	1024.8	2.2
2019	11	9	19	50	209	4.7	6.2	0.5	7.14	3.94	58	1024.4	2.9
2019	11	9	20	50	193	5.4	7.2	0.42	6.25	4.02	46	1024.1	3.2
2019	11	9	21	50	196	7.8	10.3	0.45	6.67	3.6	42	1023.7	3.5
2019	11	9	22	50	211	8.1	9.9	0.53	3.33	3.52	208	1023.8	3.7
2019	11	9	23	50	221	7.2	8.9	0.57	3.57	3.69	207	1023.8	3.7
2019	11	10	0	50	218	7.5	9.7	0.7	3.85	3.73	218	1023.4	4.1
2019	11	10	1	50	229	7.7	9.5	0.7	3.7	3.49	218	1023.1	4.5
2019	11	10	2	50	215	6.1	7.7	0.6	3.7	3.33	224	1023	4.6
2019	11	10	3	50	217	6.2	7.9	0.5	3.23	3.17	235	1022.3	5
2019	11	10	4	50	213	6.8	9.1	0.49	2.86	2.99	213	1021.7	5.6
2019	11	10	5	50	226	5.8	7.9	0.46	2.86	3.27	212	1021.4	5.7
2019	11	10	6	50	248	4.6	6	0.39	7.14	3.35	108	1021	5.2
2019	11	10	7	50	247	4.7	6.2 9	9	99.00 9	9	999	1020.6	5.2
2019	11	10	8	50	224	2.6	3.9	0.34	8.33	3.58	119	1020.3	5.5
2019	11	10	9	50	174	3.7	5.1	0.33	3.13	3.63	124	1019.8	5.8
2019	11	10	10	50	203	4.1	5.6	0.33	17.39	3.88	124	1019.7	6.2
2019	11	10	11	50	218	6.5	7.8 9	9	99.00 9	9	999	1019.5	6.4
2019	11	10	12	50	222	7.5	9.5	0.5	3.57	3.39	258	1019.6	6.8
2019	11	10	13	50	225	8.8	10.3	0.67	3.85	3.47	250	1019.1	7
2019	11	10	14	50	227	7.6	9.6	0.73	4	3.46	235	1018.6	6.4
2019	11	10	15	50	213	8.6	10.1	0.67	3.7	3.29	233	1017.6	7.4
2019	11	10	16	50	221	9.1	10.9	0.78	3.57	3.21	225	1016.8	8.1
2019	11	10	17	50	212	10.5	12.4	0.75	3.33	3.2	220	1015.8	9.1
2019	11	10	18	50	207	10.9	13.2	0.87	3.45	3.38	224	1014.4	9.9
2019	11	10	19	50	214	11.7	13.5	0.97	3.85	3.46	213	1015	10.1
2019	11	10	20	50	221	9.8	11.8	0.94	4.17	3.56	218	1015	10
2019	11	10	21	50	222	9.4	12.1	0.86	4.55	3.75	219	1015.2	10
2019	11	10	22	50	221	9.1	11	0.88	4.76	3.82	225	1015.3	10.1
2019	11	10	23	50	226	9.2	11.2	0.83	4.55	3.83	223	1015.4	10.1
2019	11	11	0	50	230	9.3	11.6	0.83	4.55	3.97	234	1015.5	10
2019	11	11	1	50	243	9.3	11.3	0.86	4.35	3.84	226	1016.2	9.9
2019	11	11	2	50	253	8.4	10	0.79	4.17	3.62	239	1016.7	9.5
2019	11	11	3	50	251	7.8	9.5	0.78	4	3.67	233	1017.1	9.1
2019	11	11	4	50	244	6.9	8.2	0.78	3.85	3.39	239	1016.7	9.1
2019	11	11	5	50	240	7.6	8.7	0.69	3.23	3.27	252	1017.5	9.2
2019	11	11	6	50	236	7.7	9.1	0.74	3.45	3.28	242	1017.7	9.1
2019	11	11	7	50	238	7.3	8.8	0.69	3.45	3.36	246	1017.5	9.5
2019	11	11	8	50	240	7.6	9	0.72	3.7	3.35	234	1018.1	9.7
2019	11	11	9	50	233	6.8	7.9	0.64	3.85	3.66	254	1018.9	9.5
2019	11	11	10	50	227	5.4	6.5	0.6	4	3.8	255	1019.1	10.2
2019	11	11	11	50	224	5.5	6.7	0.6	4.35	3.82	245	1019.8	10.1
2019	11	11	12	50	203	3.7	4.8	0.52	4	3.98	242	1020	10.1
2019	11	11	13	50	203	3.9	4.6	0.46	3.85	3.97	260	1020.6	10.6
2019	11	11	14	50	181	2.8	3.4	0.45	16	4.17	104	1020.7	11.1
2019	11	11	15	50	183	3	3.7	0.39	16	4	99	1020.7	11.1
2019	11	11	16	50	165	3.1	4.2	0.37	16	4.15	109	1020	11.4
2019	11	11	17	50	161	4.1	4.9	0.31	17.39	4.14	43	1019.4	12.2
2019	11	11	18	50	169	6.2	7.1	0.39	16	4.32	40	1018.7	12.3
2019	11	11	19	50	151	7	8.2	0.43	16	3.39	146	1018.4	12
2019	11	11	20	50	144	7.3	8.5	0.62	17.39	3.78	117	1018	11.4
2019	11	11	21	50	142	5.5	6.4	0.69	3.7	3.88	126	1017.6	11.4
2019	11	11	22	50	145	6.2	6.9	0.62	16	3.61	32	1017.2	11.6
2019	11	11	23	50	143	7	7.8	0.68	3.85	3.64	134	1016.7	11.6
2019	11	12	0	50	139	6.9	7.8	0.71	3.85	3.7	133	1015.8	11.6
2019	11	12	1	50	142	7	8	0.71	13.79	3.84	79	1014.9	11.6
2019	11	12	2	50	146	6.7	7.6	0.67	10	3.93	90	1014	11.8
2019	11	12	3	50	149	6	6.8	0.75	10.81	4.32	102	1012.8	11.9
2019	11	12	4	50	171	5.9	6.8	0.85	10.81	4.65	80	1011.7	12.4
2019	11	12	5	50	197	4.4	5.1	0.94	12.12	5.86	99	1010.9	11.8
2019	11	12	6	50	271	3	3.9	1.11	10	6.25	81	1010.3	11.3
2019	11	12	7	50	1	3.7	4.4	1.33	6.67	6.16	21	1008.5	10.2
2019	11	12	8	50	133	2.1	2.8	1.39	6.25	5.39	9	1007.3	10.7
2019	11	12	9	50	205	2.5	3.2	1.32	5.88	5.45	357	1007.2	10.8
2019	11	12	10	50	265	2	2.5	1.42	6.25	5.34	11	1007	10.3
2019	11	12	11	50	26	1.7	2.2	1.38	5.56	5.42	30	1006.3	10
2019	11	12	12	50	170	5	6.3	1.29	6.67	5.15	19	1005.1	11.2
2019	11	12	13	50	191	7.6	9.3	1.35	11.43	5.13	102	1003.7	13.3
2019	11	12	14	50	213	8	10.2	1.36	10.81	5.11	71	1004	13.1
2019	11	12	15	50	253	3.6	4.3	1.45	6.67	5.17	21	1004.2	11.4
2019	11	12	16	50	296	12.4	15.5	1.35	10.81	5.31	99	1004	8.2
2019	11	12	17	50	303	10.6	12.8	1.36	10	4.63	124	1004.7	6.5
2019	11	12	18	50	301	10.6	12.8	1.51	9.09	4.52	110	1006.2	5.3
2019	11	12	19	50	302	13.1	15.8	1.73	4.55	4.5	325	1006.8	3.8
2019	11	12	20	50	291	13.8	17	1.87	5.26	4.6	321	1008	2
2019	11	12	21	50	307	13.3	16.1	1.92	5.88	4.62	312	1009.4	1
2019	11	12	22	50	304	14.1	17.4	2.08	5.88	4.92	311	1010.4	0.2
2019	11	12	23	50	309	12.6	16	2.4	6.25	5.31	317	1011.2	0.9
2019	11	13	0	50	295	11.7	15.1	2.25	6.25	5.29	316	1011.7	0.8
2019	11	13	1	50	293	13.2	17.3	2.09	5.88	5.2	297	1012.2	0.8
2019	11	13	2	50	285	14.3	17.6	2.25	6.25	5.22	300	1012.3	0.1
2019	11	13	3	50	290	14.3	18.1	2.67	6.25	5.45	308	1013.4	-1.1
2019	11	13	4	50	306	15.5	19	2.66	6.67	5.33	321	1013.9	-2.3
2019	11	13	5	50	294	14.6	19.5	2.59	5.88	5.23	307	1014.4	-2.7
2019	11	13	6	50	299	16.3	20	2.34	5.88	5.02	314	1014.5	-3.3
2019	11	13	7	50	292	14.4	18.4	2.38	6.25	4.97	327	1014.8	-3.8
2019	11	13	8	50	295	14.3	18	2.44	6.25	5.05	317	1015.7	-4
2019	11	13	9	50	300	14.1	16.9	2.45	6.25	5.12	321	1016.5	-4
2019	11	13	10	50	295	14.4	17.7	2.51	6.25	5.29	306	1016.7	-4.1
2019	11	13	11	50	301	15.5	18.7	2.57	6.25	5.45	298	1017	-4.2
2019	11	13	12	50	300	14.7	18.7	2.55	6.25	5.4	302	1018.4	-3.9
2019	11	13	13	50	300	13.2	16.4	2.65	7.14	5.65	313	1019.7	-4
2019	11	13	14	50	291	13.3	17	2.87	6.67	5.77	307	1020	-3.9
2019	11	13	15	50	297	12.8	15.7	2.66	6.25	5.42	301	1020.2	-3.4
2019	11	13	16	50	300	13.2	17.9	2.56	6.67	5.28	321	1020.3	-2.5
2019	11	13	17	50	297	12.3	16.1	2.08	5.56	4.8	301	1021.1	-1.9
2019	11	13	18	50	312	12	15.3	2.04	5.88	4.83	320	1021.9	-1
2019	11	13	19	50	303	11.1	14.6	1.7	5.56	4.38	305	1023.3	-0.9
2019	11	13	20	50	309	11.4	14.6	1.64	5.56	4.35	319	1024.1	-0.4
2019	11	13	21	50	317	11.2	13.8	1.65	5.26	4.35	316	1025.2	-0.6
2019	11	13	22	50	319	11	13.9	1.54	5.56	4.28	316	1026.2	-1.3
2019	11	13	23	50	313	10.1	13	1.54	5.56	4.63	336	1027.4	-1.4
2019	11	14	0	50	314	9.7	12.8	1.77	5.88	4.9	342	1028.8	-1.5
2019	11	14	1	50	328	9.4	12.4	1.76	5.88	4.84	338	1028.9	-1.4
2019	11	14	2	50	336	7.1	11.4	1.59	5.56	4.88	340	1029.9	-1.7
2019	11	14	3	50	9	5.4	8	1.29	5.88	4.69	343	1030.2	-1.8
2019	11	14	4	50	10	4.5	6.4	1.14	5.56	4.5	353	1030.1	-1.6
2019	11	14	5	50	354	3.4	5.6	0.96	5.26	4.35	348	1030.3	-1.6
2019	11	14	6	50	43	0.7	2.2	0.82	5	4.3	1	1031	-1.2
2019	11	14	7	50	336	2.3	3.6	0.83	5	4.2	13	1031.3	-1
2019	11	14	8	50	47	2	3.3	0.75	5.56	4.3	29	1031	-0.9
2019	11	14	9	50	82	1.1	2.3	0.72	5	4.33	15	1031.9	-0.7
2019	11	14	10	50	293	0.8	1.6	0.63	4.76	4.25	4	1032	-0.4
2019	11	14	11	50	173	1.7	3.4	0.56	5	4.27	359	1032.4	-0.1
2019	11	14	12	50	190	2.8	5	0.5	4.76	4.2	4	1032.6	0.7
2019	11	14	13	50	178	5.7	8	0.45	4.76	4.45	28	1032.4	1.1
2019	11	14	14	50	194	4.9	6.7	0.49	13.79	3.79	113	1032.7	1
2019	11	14	15	50	196	3.9	5.4	0.48	5	3.89	37	1032.3	1.3
2019	11	14	16	50	213	4.2	6	0.49	2.94	3.89	247	1031.4	1.8
2019	11	14	17	50	173	5.3	7.1 9	9	99.00 9	9	999	1030.5	2.4
2019	11	14	18	50	162	6.2	9.2	0.45	9.09	4.17	102	1029.8	3.1
2019	11	14	19	50	170	6.3	9.3	0.5	13.79	3.44	150	1029.6	4
2019	11	14	20	50	158	6.8	8.6	0.51	10	3.54	77	1029.2	4.5
2019	11	14	21	50	153	8.3	9.6	0.61	9.09	3.41	73	1028.4	5.2
2019	11	14	22	50	154	7.9	9.2	0.63	3.23	3.52	140	1027.9	6.5
2019	11	14	23	50	161	8.7	10	0.67	4	3.51	135	1026.9	7
2019	11	15	0	50	159	7.8	8.9	0.73	4.55	3.61	136	1026.1	7.4
2019	11	15	1	50	157	8.2	9.2	0.74	4.55	3.7	138	1025.5	8
2019	11	15	2	50	169	7.6	8.8	0.81	5.26	3.68	133	1025.2	8.7
2019	11	15	3	50	167	5.7	6.6	0.78	5.56	3.94	140	1024.8	8.9
2019	11	15	4	50	256	5.5	6.7	0.76	4.76	3.88	146	1024.3	8.1
2019	11	15	5	50	247	6.2	7.4	0.71	6.25	4.18	133	1023.8	8
2019	11	15	6	50	258	9.6	11.2	0.73	6.25	3.82	128	1023.2	7.8
2019	11	15	7	50	253	8.9	10.5	0.84	3.13	3.57	269	1022.8	7.2
2019	11	15	8	50	258	9.2	11	1	3.85	3.58	271	1022.6	7
2019	11	15	9	50	246	8.9	9.9	0.99	3.7	3.69	268	1022.5	7
2019	11	15	10	50	247	9.4	10.9	1.04	4.17	3.68	279	1022.2	6.8
2019	11	15	11	50	248	8.9	10.5	1	4.35	3.85	262	1022.2	6.9
2019	11	15	12	50	242	9.2	10.6	1.09	4.55	4.01	275	1022.2	6.9
2019	11	15	13	50	232	8.4	10.1	1.03	4.35	4.13	264	1022.1	7.1
2019	11	15	14	50	219	9.2	11.6	0.93	4.55	4.14	255	1021.4	7.3
2019	11	15	15	50	219	9.2	11	0.98	4.55	4.05	239	1020.2	8
2019	11	15	16	50	215	9.6	11.1	0.98	4.17	3.93	238	1018.7	8.8
2019	11	15	17	50	217	9.5	11.2	0.96	4.17	3.85	218	1017.4	9.7
2019	11	15	18	50	214	10.2	12	1.02	4.35	3.81	221	1017	9.9
2019	11	15	19	50	223	8.8	10.1	1.04	4.35	3.75	215	1016.8	10.2
2019	11	15	20	50	240	7.7	8.9	0.94	4.35	3.75	212	1016.7	10.7
2019	11	15	21	50	234	8.1	9.4	0.79	3.23	3.73	224	1017.3	10.3
2019	11	15	22	50	267	9	10.6	0.79	3.7	3.57	224	1017.8	10.4
2019	11	15	23	50	266	8.7	10.7	0.94	3.7	3.76	269	1018.3	9.9
2019	11	16	0	46	271	10.1	12.5	1.04	4	3.9	273	1018.3	9.4
2019	11	16	1	50	295	9.5	12	0.99	4.35	4.03	287	1018.7	8.5
2019	11	16	2	50	285	11.7	15.6	1.19	4.55	4.26	302	1019.6	7.6
2019	11	16	3	50	310	9.8	12.4	1.22	5.88	4.45	299	1020.6	6.9
2019	11	16	4	50	302	11.6	15.1	1.33	5.26	4.51	294	1020.4	6.5
2019	11	16	5	50	313	11.5	14.1	1.5	5.26	4.47	297	1021.3	6.3
2019	11	16	6	50	327	15.1	18.5	1.5	4.76	4.31	309	1022.1	4.3
2019	11	16	7	50	313	13.8	16.4	2.23	5.56	4.91	338	1023.4	3.2
2019	11	16	8	50	330	14.5	18.4	2.15	6.25	4.96	347	1024.8	1.9
2019	11	16	9	50	347	14.7	18.3	2.23	6.25	5.05	337	1026	1.4
2019	11	16	10	50	357	14	17.5	2.52	6.67	5.35	346	1027.4	0.8
2019	11	16	11	50	3	13.5	17.4	2.73	7.14	5.56	5	1029.2	0.5
2019	11	16	12	50	2	12.4	15.1	2.75	7.14	5.64	357	1030.4	0.5
2019	11	16	13	50	4	13	18.8	2.58	7.14	5.73	2	1030.8	0.7
2019	11	16	14	50	5	13.1	15.6	2.56	7.14	5.37	2	1030.8	0.5
2019	11	16	15	50	3	12.1	15.1	2.13	7.14	5.27	4	1031.1	0.2
2019	11	16	16	50	5	10.6	12.4	2.04	7.14	5.18	1	1030.8	0.5
2019	11	16	17	50	8	10.8	13.4	2.05	7.14	5.28	7	1030.5	1
2019	11	16	18	50	9	10.8	13.7	1.88	7.14	5.07	25	1030.2	1.5
2019	11	16	19	50	9	10.2	13	2.29	6.67	5.33	28	1030.2	1.6
2019	11	16	20	50	2	10	14.3	1.96	6.67	5.1	26	1030.3	1.7
2019	11	16	21	50	358	9.5	11.6	1.88	6.25	5.06	34	1031.1	1.9
2019	11	16	22	50	8	10.2	12.9	1.75	6.25	4.96	31	1031.2	2.1
2019	11	16	23	50	22	8.4	10.5	1.59	5.88	4.68	22	1032	1.9
2019	11	17	0	50	31	8.3	11.6	1.58	5.56	4.66	17	1032.1	2.5
2019	11	17	1	50	49	7.7	10.5	1.43	5.88	4.55	10	1032.3	2.8
2019	11	17	2	50	44	8	10.3	1.25	5.56	4.32	17	1031.9	3.1
2019	11	17	3	50	49	8.6	10.5	1.15	5.56	4.34	8	1031.6	3.3
2019	11	17	4	50	48	8.1	10.3	1.13	5	4.11	10	1031.4	3.3
2019	11	17	5	50	42	8.5	10.8	1.21	5.26	4.24	12	1030.6	3.2
2019	11	17	6	50	57	8.8	11.5	1.23	5.26	4.31	28	1030.5	3.3
2019	11	17	7	50	58	8	10.7	1.45	5.56	4.65	33	1030.4	3.2
2019	11	17	8	50	59	9.1	11.2	1.44	5.88	4.62	41	1030.1	3.3
2019	11	17	9	50	52	8.7	10.9	1.46	5.88	4.7	44	1030.4	3.2
2019	11	17	10	50	53	9.5	11.9	1.54	6.25	4.72	51	1029.8	3.5
2019	11	17	11	50	57	9.8	12.1	1.39	6.25	4.65	55	1029.5	3.8
2019	11	17	12	50	63	9.8	12.4	1.54	5.88	4.51	43	1029.9	3.9
2019	11	17	13	50	61	9.8	12.1	1.53	5.56	4.52	43	1030.4	4
2019	11	17	14	50	74	9.5	12	1.45	5.56	4.42	46	1029.8	4.3
2019	11	17	15	50	70	8.8	11.3	1.51	6.25	4.54	71	1028.9	4.6
2019	11	17	16	50	66	8	9.9	1.52	5.88	4.65	72	1027.8	4.9
2019	11	17	17	50	73	8.7	11	1.54	6.25	4.69	78	1027	5.2
2019	11	17	18	50	75	8.9	10.9	1.57	5.88	4.72	69	1026.3	5.2
2019	11	17	19	50	68	9	11.2	1.62	5.88	4.86	75	1025.6	5.4
2019	11	17	20	50	67	8.9	11.1	1.59	6.25	4.84	76	1025.4	5.4
2019	11	17	21	50	66	9.3	10.9	1.68	5.88	5	65	1024.8	5.4
2019	11	17	22	50	66	9.8	12.1	1.7	6.25	5.1	73	1024.2	5.5
2019	11	17	23	50	71	9.9	13.4	1.81	6.67	5.24	95	1023.4	5.8
2019	11	18	0	50	66	10	12.7	1.96	6.67	5.35	98	1022.7	6.2
2019	11	18	1	50	68	10	12.9	1.98	6.67	5.26	103	1021.5	6.7
2019	11	18	2	50	65	10.4	12.5	2.09	6.67	5.23	107	1020.1	6.9
2019	11	18	3	50	49	10.9	12.8	2.05	6.67	5.27	95	1018.7	7.2
2019	11	18	4	50	50	11.5	12.9	1.97	7.14	5.23	97	1018	7.4
2019	11	18	5	50	53	11.5	13.7	2.07	7.14	5.27	95	1016.6	7.7
2019	11	18	6	50	53	11.7	13.9	2.49	7.14	5.59	97	1015.5	7.5
2019	11	18	7	50	45	12.2	14.9	2.69	8.33	5.94	124	1014.4	7.2
2019	11	18	8	50	43	12.2	15	2.71	7.69	5.99	109	1013.4	7.4
2019	11	18	9	50	42	12.3	14.6	3	9.09	6.19	123	1012.9	7.4
2019	11	18	10	50	40	12.8	15.2	3.28	9.09	6.59	118	1011.9	7.5
2019	11	18	11	50	45	13.1	15.8	3.07	9.09	6.35	112	1011.4	8
2019	11	18	12	50	40	12.3	15.4	3.31	9.09	6.52	106	1010.6	8.4
2019	11	18	13	50	37	12.8	15.7	3.61	9.09	6.62	108	1009.7	8.4
2019	11	18	14	50	28	13.3	15.8	3.5	9.09	6.6	109	1008.3	8.4
2019	11	18	15	50	23	13.6	16.9	3.42	9.09	6.46	102	1006.7	8.4
2019	11	18	16	50	15	13.9	18.2	3.34	9.09	6.35	112	1005	8.4
2019	11	18	17	50	11	14	17.7	3.91	10	6.67	117	1004	8.2
2019	11	18	18	50	6	15.5	19	4.43	9.09	6.78	111	1002.6	7.2
2019	11	18	19	50	4	15.4	19.3	4.26	7.69	6.91	28	1002.1	7.2
2019	11	18	20	50	8	15.6	19.8	4.65	7.69	7.13	40	1001.6	7
2019	11	18	21	50	11	13.9	17	4.26	10	7.07	99	1001.8	7.2
2019	11	18	22	50	9	13	16.6	4.56	7.69	7.18	41	1002.3	7.3
2019	11	18	23	50	12	13.1	16.3	4.83	10.81	7.61	96	1001.6	7.5
2019	11	19	0	50	11	12.2	15.2	4.46	8.33	7.43	51	1001.6	7.7
2019	11	19	1	50	4	11.4	14	4.42	10	7.2	86	1002.4	7.5
2019	11	19	2	50	3	11.6	13.9	4.23	11.43	7.49	90	1002.1	7.1
2019	11	19	3	50	360	10.8	13.1	3.93	10.81	7.19	85	1001.9	6.8
2019	11	19	4	50	2	9.9	11.6	4.06	11.43	7.56	86	1002.4	6.5
2019	11	19	5	50	352	7.7	9.6	3.8	11.43	7.56	92	1003.4	6.5
2019	11	19	6	50	346	7.5	9.3	4.02	11.43	7.95	91	1003.8	5.8
2019	11	19	7	50	331	7.2	8.8	3.77	10.81	7.92	86	1004.2	5.6
2019	11	19	8	50	330	4.8	6.5	3.74	11.43	8.03	90	1005.2	5.7
2019	11	19	9	50	296	2.5	5.2	3.6	12.12	8.12	82	1005.7	5.9
2019	11	19	10	50	304	3.7	5.4	3.76	12.12	8.41	79	1006.2	5.5
2019	11	19	11	50	282	2.2	4.2	3.43	11.43	8.26	84	1007.2	5.6
2019	11	19	12	50	299	2.2	3.5	3.27	11.43	8.14	85	1007.4	5.6
2019	11	19	13	50	304	2.1	3.3	3.16	11.43	7.9	81	1007.3	5.8
2019	11	19	14	50	260	1.5	3.3	3	11.43	8	77	1007.6	6.1
2019	11	19	15	50	280	1.6	2.7	2.75	11.43	7.86	79	1007.6	6.2
2019	11	19	16	50	235	3.9	5.5	2.53	11.43	7.73	85	1007.4	6.3
2019	11	19	17	50	225	3.2	4.4	2.34	11.43	7.81	93	1007.5	6.4
2019	11	19	18	50	258	3.7	5.6	2.36	11.43	8.12	83	1007.2	6.5
2019	11	19	19	50	255	3.8	5	2	10.81	7.37	81	1007.5	7
2019	11	19	20	50	285	4.4	5.6	2.31	10.81	7.73	91	1008.3	7.3
2019	11	19	21	50	327	3.3	4.4	2.35	10.81	7.82	93	1009.1	6.8
2019	11	19	22	50	330	5	6.2	1.99	10.81	7.47	91	1010	6.7
2019	11	19	23	50	347	4.7	5.6	1.98	10.81	7.42	94	1010.1	6.7
2019	11	20	0	50	354	5.4	6.3	1.83	10.81	7.09	89	1010.5	6.6
2019	11	20	1	50	360	5.1	6	1.81	10.81	7.31	90	1010.8	6.5
2019	11	20	2	50	351	4	5.4	1.77	10.81	7.31	90	1010.9	6.5
2019	11	20	3	50	348	5.1	6.4	1.54	10.81	6.83	99	1010.3	6.2
2019	11	20	4	50	27	3.7	5.5	1.34	10	6.98	93	1009.8	6.3
2019	11	20	5	50	94	0.8	1.2	1.3	10	7.33	93	1009.9	6.7
2019	11	20	6	50	15	5.3	6.9	1.25	9.09	7.29	101	1009.4	7.2
2019	11	20	7	50	27	7	8.2	1.29	10	6.76	97	1008.8	7.2
2019	11	20	8	50	26	7	8.6	1.26	10	5.68	113	1009	7
2019	11	20	9	50	39	8.1	9.8	1.27	10	4.92	121	1009.7	6.6
2019	11	20	10	50	30	8.1	9.9	1.52	10	5.14	109	1009.9	6.4
2019	11	20	11	50	11	8.2	10	1.65	10	5.31	110	1009.7	6
2019	11	20	12	50	33	7	9.1	1.53	10	5.32	91	1010.5	6.2
2019	11	20	13	50	18	7	8.6	1.51	10	5.16	97	1010.8	6
2019	11	20	14	50	4	8	9.5	1.49	9.09	5.13	105	1010.8	5.7
2019	11	20	15	50	5	7.8	9.4	1.53	5.26	5.09	37	1010.9	5.2
2019	11	20	16	50	357	8.3	9.7	1.39	9.09	4.88	97	1010.3	5.3
2019	11	20	17	50	354	9.9	11.8	1.42	5.26	4.77	43	1010.4	4.8
2019	11	20	18	50	341	9.5	11.4	1.32	5.26	4.5	25	1010.6	4.5
2019	11	20	19	50	342	9.2	10.5	1.34	5.56	4.39	42	1010.9	4.2
2019	11	20	20	50	343	9.3	11.4	1.49	5.88	4.76	43	1011.2	4.5
2019	11	20	21	50	346	9.6	11.1	1.58	6.25	4.85	38	1011.5	4.7
2019	11	20	22	50	357	9.3	10.8	1.61	5.88	4.78	42	1012.1	4.7
2019	11	20	23	50	351	9.5	11.2	1.66	5.56	4.83	31	1012.4	4.9
2019	11	21	0	50	357	10.3	12.6	1.75	6.67	4.98	65	1012.8	4.9
2019	11	21	1	50	351	10.4	12.8	1.95	6.25	5.21	49	1013.3	4.9
2019	11	21	2	50	356	10.4	12.3	1.95	7.14	5.2	60	1013.6	5
2019	11	21	3	50	344	11	13.2	2.07	7.14	5.13	52	1013.7	5.2
2019	11	21	4	50	360	12	14.4	2.05	7.14	5.09	47	1013.9	5.2
2019	11	21	5	50	353	11.2	13.9	2.16	7.69	5.07	58	1014.3	5.6
2019	11	21	6	50	354	11.6	14.1	2.26	7.14	5.24	50	1014.9	5.5
2019	11	21	7	50	354	12.2	14.7	2.25	7.69	5.34	47	1014.8	6.1
2019	11	21	8	50	352	12.2	14.9	2.28	7.14	5.39	40	1015.3	6.2
2019	11	21	9	50	346	11.4	14.2	2.47	7.14	5.53	44	1015.8	6.1
2019	11	21	10	50	349	10.7	12.7	2.41	7.14	5.37	42	1016.8	6
2019	11	21	11	50	344	11.4	13.5	2.4	7.69	5.44	53	1017.7	6
2019	11	21	12	50	347	11.5	13.8	2.37	7.69	5.59	56	1018.2	6.2
2019	11	21	13	50	351	10.1	13.3	2.41	8.33	5.68	61	1019	6.3
2019	11	21	14	50	351	9.2	11.4	2.37	7.69	5.62	57	1019.2	6.2
2019	11	21	15	50	353	8.4	9.9	2.38	8.33	5.77	66	1018.7	6.2
2019	11	21	16	50	341	8.3	10.4	2.11	8.33	5.72	63	1018.6	6.1
2019	11	21	17	50	331	7.1	8.4	2.05	7.69	5.93	58	1018.3	6.1
2019	11	21	18	50	320	5.9	7.4	1.9	8.33	5.85	60	1018.1	6.1
2019	11	21	19	50	339	4.5	6.3	1.8	7.69	5.97	57	1018.1	6.3
2019	11	21	20	50	329	3.1	4.5	1.79	8.33	6.29	61	1018.4	6.4
2019	11	21	21	50	291	2.4	3.6	1.63	7.69	6.27	54	1018.5	6.4
2019	11	21	22	50	312	0.3	1.1	1.58	8.33	6.28	69	1018.5	6.4
2019	11	21	23	50	141	1.2	1.7	1.5	7.69	6.39	59	1018.4	6.6
2019	11	22	0	50	159	2.7	3.4	1.43	9.09	6.13	86	1018.1	6.8
2019	11	22	1	50	178	4.7	6.1	1.4	7.69	6.32	70	1017.8	6.7
2019	11	22	2	50	174	6.5	7.8	1.41	7.69	6.23	64	1017.1	6.5
2019	11	22	3	50	180	7.1	8.4	1.43	7.69	5.95	62	1016.5	6.7
2019	11	22	4	50	191	6.9	8.3	1.53	8.33	5.72	74	1016.1	7
2019	11	22	5	50	188	7.2	8.4	1.34	7.69	5.37	69	1015.1	7.4
2019	11	22	6	50	182	7.7	8.9	1.38	8.33	5.82	84	1014.1	7.6
2019	11	22	7	50	184	8.4	10.2	1.32	8.33	5.57	72	1013.2	8
2019	11	22	8	50	186	8.6	10.8	1.31	9.09	5.57	83	1012.1	8.5
2019	11	22	9	50	183	8.4	9.8	1.15	8.33	5.24	71	1011.2	8.8
2019	11	22	10	50	182	8.3	10.1	1.26	9.09	5.28	78	1010	9.2
2019	11	22	11	50	186	9.6	11.3	1.2	9.09	4.89	86	1008.6	9.7
2019	11	22	12	50	197	10	12.8	1.15	9.09	4.52	70	1007.6	10.2
2019	11	22	13	50	205	9.2	11	1.3	10	4.63	58	1007.1	10.4
2019	11	22	14	50	212	11.2	12.9	1.21	10	4.36	92	1005.7	10.7
2019	11	22	15	50	210	11.9	13.9	1.41	10	4.58	82	1003.9	10.8
2019	11	22	16	50	212	11.2	13.5	1.52	10	4.56	77	1003.3	10.9
2019	11	22	17	50	206	11.7	13.5	1.54	10	4.87	75	1001.3	10.8
2019	11	22	18	50	206	11.9	14.4	1.34	10	4.64	69	1000.1	10.7
2019	11	22	19	50	214	10	11.8	1.36	10	4.83	78	1000.3	10.2
2019	11	22	20	50	297	11.4	15.6	1.14	11.43	4.97	63	1000.8	8.5
2019	11	22	21	50	271	11.4	14.5	1.35	4.76	4.38	263	1000.5	7.2
2019	11	22	22	50	275	13.9	16.6	1.83	5.26	4.97	283	1000.9	7.5
2019	11	22	23	50	276	15.8	18.4	2.21	5.56	5.1	290	1001.5	7
2019	11	23	0	50	273	15.8	19.1	2.4	6.25	5.22	297	1002.6	6.8
2019	11	23	1	50	278	15.4	18.4	2.12	5.88	4.82	294	1003.6	6.6
2019	11	23	2	50	297	15.5	18.5	2.1	5.56	4.64	287	1004.6	6.3
2019	11	23	3	50	293	15.3	19.3	2.15	5.88	4.68	301	1005.8	5.7
2019	11	23	4	50	295	12.8	18	2.26	5.88	4.91	301	1007.3	4.9
2019	11	23	5	50	290	14.1	18.2	2.37	6.25	5.09	308	1008.2	4.2
2019	11	23	6	50	296	14	16.9	2.34	6.25	4.99	322	1009.7	3.5
2019	11	23	7	50	291	11.5	14.4	2.33	6.67	5.18	323	1010.7	3.3
2019	11	23	8	50	291	10.2	12.2	1.95	5.88	5.11	308	1011.3	3.2
2019	11	23	9	50	283	10.6	13.5	1.58	5.88	4.91	300	1011.5	3.1
2019	11	23	10	50	287	11.5	14.3	1.67	5.88	4.93	310	1011.6	3.1
2019	11	23	11	50	294	12.3	16	1.7	5.88	4.74	305	1011.9	3
2019	11	23	12	50	304	11.2	14	1.79	5.56	4.76	319	1012.6	2.9
2019	11	23	13	50	291	10.7	12.9	1.78	5.26	4.6	317	1013	2.8
2019	11	23	14	50	287	9.5	11.8	1.59	5.26	4.3	315	1013.8	2.8
2019	11	23	15	50	277	8.7	10.6	1.33	5	4.06	306	1013.1	3
2019	11	23	16	50	267	7.6	9.2	1.17	4.35	3.99	306	1012.7	3.4
2019	11	23	17	50	248	7.3	9	0.99	4.35	3.76	299	1012.4	4.3
2019	11	23	18	50	237	6.1	8.1	0.83	4.17	3.67	298	1012.3	5.4
2019	11	23	19	50	247	6.5	7.9	0.72	4	3.82	303	1012.5	6.3
2019	11	23	20	50	265	4.7	6.3	0.62	3.7	3.86	273	1011.6	6.3
2019	11	23	21	50	232	5.2	6.7	0.58	4.17	3.94	316	1012.1	6.7
2019	11	23	22	50	226	6.9	8.3	0.53	4.17	3.87	293	1012	6.9
2019	11	23	23	50	222	6.7	7.8	0.58	4	3.81	282	1011.8	6.7
2019	11	24	0	46	233	7.4	9.2	0.64	3.85	3.64	273	1011.1	6.8
2019	11	24	1	50	239	5.9	7.3	0.77	3.7	3.62	252	1010.5	6.6
2019	11	24	2	50	229	6.1	7.3	0.66	3.45	3.5	241	1010.4	6.6
2019	11	24	3	50	221	6.6	7.6	0.57	9.09	3.33	85	1009.5	6.5
2019	11	24	4	50	225	5.7	6.5	0.55	9.09	3.44	102	1008.9	6.6
2019	11	24	5	50	193	4.7	5.4	0.5	2.86	3.38	227	1008	6.7
2019	11	24	6	50	173	4.7	5.8	0.43	9.09	3.85	105	1007.8	7.2
2019	11	24	7	50	164	4.9	5.6	0.39	8.33	3.74	117	1006.9	7.1
2019	11	24	8	50	170	4.9	5.6	0.39	8.33	3.7	104	1006.5	7.6
2019	11	24	9	50	157	4.2	5	0.4	2.74	3.54	137	1005.3	7.7
2019	11	24	10	50	109	5	5.9	0.4	10	3.48	108	1003.2	7.9
2019	11	24	11	50	90	7	8.4	0.38	10	3.62	78	1001.7	8.1
2019	11	24	12	50	82	9.1	10.8	0.48	10	3.09	101	1000.2	8.2
2019	11	24	13	50	76	10.6	12.2	0.73	3.45	3.3	113	998.1	8.6
2019	11	24	14	50	74	10.5	13	1.02	4	3.74	102	996.6	8.8
2019	11	24	15	50	79	11.6	14.5	1.26	4.76	4.19	102	993.6	9.2
2019	11	24	16	50	74	11	13.2	1.58	5.88	4.75	101	989.8	9.5
2019	11	24	17	50	96	11.6	14.6	1.84	6.25	5.12	97	986.3	11.1
2019	11	24	18	50	99	13.9	16.9	2.22	6.67	5.48	107	983	11.4
2019	11	24	19	50	153	7.8	10.2	2.54	6.67	5.59	103	982.3	12
2019	11	24	20	50	192	10.7	14	2.53	7.14	5.58	108	981.8	11.8
2019	11	24	21	50	201	7.9	10.1	2.04	7.14	5.45	103	981.4	10.3
2019	11	24	22	50	180	7	8.4	1.7	7.14	5.21	102	981.2	8.7
2019	11	24	23	50	257	6.5	8.8	1.67	6.67	5.33	92	980.7	8.5
2019	11	25	0	46	316	16.8	22.4	1.87	7.14	5.25	98	979.5	7.7
2019	11	25	1	50	315	20	24.1	3.21	7.14	5.84	333	982.7	5.7
2019	11	25	2	50	308	17.6	21.1	3.35	7.14	5.77	356	986.1	5.5
2019	11	25	3	50	306	15.3	19.8	3.15	7.14	5.74	8	988.4	6.4
2019	11	25	4	50	290	15.2	17.4	3.15	7.14	5.77	5	990.8	6.2
2019	11	25	5	50	287	15.5	18.4	3.02	7.14	5.45	11	992.5	6.4
2019	11	25	6	50	291	15.1	19.1	3.08	7.14	5.6	19	994.5	6.5
2019	11	25	7	50	288	14.4	17.4	2.8	7.69	5.56	32	996.3	6.5
2019	11	25	8	50	282	13.8	17.3	2.6	6.25	5.35	319	998.4	6.3
2019	11	25	9	50	281	12.9	16	2.44	6.25	5.39	315	999.9	6.1
2019	11	25	10	50	281	14.4	18.1	2.3	5.88	5.39	311	1001.2	6
2019	11	25	11	50	293	12.8	16.6	2.23	6.25	5.35	304	1002.8	6.2
2019	11	25	12	50	294	12.4	15.1	2.26	5.88	5.21	315	1004.3	6.6
2019	11	25	13	50	287	10.1	12.2	1.95	5.88	5.18	291	1005.2	6.7
2019	11	25	14	50	283	9.5	11.2	1.71	5.26	4.85	308	1005.8	7.3
2019	11	25	15	50	267	8.1	9.9	1.49	4.55	4.68	307	1006.3	7.4
2019	11	25	16	50	273	8	9.5	1.3	7.69	4.46	60	1006.2	7.8
2019	11	25	17	50	276	6.1	7.2	1.25	7.69	4.77	59	1006.7	8.1
2019	11	25	18	50	262	7.3	8.6	1.12	10.81	4.75	117	1007.3	8.6
2019	11	25	19	50	259	5	5.9	0.94	11.43	4.67	101	1008.7	9.2
2019	11	25	20	50	227	2.6	3.1	0.82	7.69	4.86	64	1009.2	9.1
2019	11	25	21	50	213	1.6	2	0.72	10.81	5.14	114	1010.1	8.6
2019	11	25	22	50	142	2.8	3.2	0.67	10.81	5.7	113	1010.5	8.8
2019	11	25	23	50	201	2.4	2.9	0.58	10.81	5.94	97	1011.2	9.2
2019	11	26	0	50	231	4.8	5.9	0.6	10	6.12	118	1011.5	9.1
2019	11	26	1	50	236	6.4	8.1	0.68	9.09	5.44	118	1012.1	9.2
2019	11	26	2	50	237	6.4	7.6	0.82	10	4.93	134	1012.5	8.9
2019	11	26	3	50	246	7.3	8.6	0.89	10	4.47	101	1012.8	8.8
2019	11	26	4	50	249	5.5	6.4	0.9	9.09	4.22	120	1013.1	8.7
2019	11	26	5	50	251	4.1	5.1	0.81	9.09	4.48	116	1013.1	8.7
2019	11	26	6	50	225	5.4	6.1	0.75	10	4.94	117	1014.1	8.6
2019	11	26	7	50	224	4.5	5.4	0.62	10	5.15	115	1014.5	8.5
2019	11	26	8	50	199	5.1	5.8	0.65	9.09	5.36	108	1014.3	8.3
2019	11	26	9	50	205	4.5	5.4	0.69	10	6.03	120	1014.7	8.3
2019	11	26	10	50	218	5.6	6.8	0.6	10.81	5.07	112	1015.2	8.4
2019	11	26	11	50	210	5.5	6.4	0.55	10.81	4.44	108	1015.2	8.4
2019	11	26	12	50	208	5.1	5.8	0.6	10.81	4.71	139	1015.5	8.7
2019	11	26	13	50	205	5.8	6.9	0.62	10	4.22	130	1015.4	8.8
2019	11	26	14	50	215	5.6	7.1	0.64	10	4.24	129	1016.1	9.3
2019	11	26	15	50	208	6.1	7.2	0.64	9.09	4.11	117	1015.6	9.7
2019	11	26	16	50	207	8.1	9.1	0.7	9.09	4	118	1015.2	10.3
2019	11	26	17	50	204	9.6	11.2	0.81	10	3.91	119	1014.5	10.8
2019	11	26	18	50	203	10.1	12.2	0.92	9.09	3.67	93	1013.8	11.2
2019	11	26	19	50	206	10.6	12.3	0.9	3.7	3.8	214	1013.7	11.2
2019	11	26	20	50	206	10	12	0.92	3.7	3.83	211	1014	10.8
2019	11	26	21	50	210	9.1	10.4	0.92	4	3.94	206	1014.5	10.4
2019	11	26	22	50	207	9.4	10.9	0.86	4.17	4.04	193	1014.8	10.2
2019	11	26	23	50	212	7.6	9	0.81	4.76	4.14	207	1015.5	10
2019	11	27	0	50	225	6.6	7.9	0.7	4	4.11	201	1016.3	9.9
2019	11	27	1	50	230	7.7	9.2	0.63	4	4.06	212	1016.6	9.9
2019	11	27	2	50	230	6	6.8	0.59	4	3.93	213	1016.8	9.6
2019	11	27	3	50	229	5.7	6.7	0.61	8.33	3.98	117	1017	9.5
2019	11	27	4	50	238	5.8	6.9	0.66	9.09	3.97	110	1017.3	9.5
2019	11	27	5	50	246	4.3	4.9	0.58	7.69	4.03	112	1017.3	9.3
2019	11	27	6	50	265	2.5	2.9	0.59	7.69	4.51	115	1018	9.1
2019	11	27	7	50	227	2.2	2.6	0.57	7.69	4.64	110	1018.3	8.9
2019	11	27	8	50	263	2.1	2.4	0.54	10	5.12	102	1018.5	8.8
2019	11	27	9	50	241	1.2	1.4	0.52	8.33	5.41	108	1018.5	8.7
2019	11	27	10	50	199	0.9	1.2	0.48	9.09	5.5	136	1018.7	8.6
2019	11	27	11	50	181	1.5	2	0.46	4.76	4.89	140	1018.6	8.5
2019	11	27	12	50	143	1.4	1.8	0.39	7.69	5.08	129	1018.2	8.9
2019	11	27	13	50	78	1.8	2	0.34	9.09	5	114	1018	8.9
2019	11	27	14	50	83	3.4	3.8	0.35	9.09	5.17	145	1017.1	9
2019	11	27	15	50	95	4.3	5.2	0.35	7.69	5.63	126	1015.4	9.1
2019	11	27	16	50	104	4.8	5.6	0.41	8.33	5.85	124	1014	9.3
2019	11	27	17	50	110	4.2	5.1	0.43	7.69	4.97	105	1013.4	9.3
2019	11	27	18	50	118	5.5	6.4	0.41	7.69	4.63	116	1011.9	9.3
2019	11	27	19	50	72	4.5	5.5	0.47	8.33	5.08	109	1010.2	9.4
2019	11	27	20	50	74	5.9	7.2	0.52	8.33	4.71	111	1008.7	9.5
2019	11	27	21	50	85	6	7.8	0.55	3.23	3.9	66	1007.1	9.7
2019	11	27	22	50	133	3.9	4.6	0.61	8.33	3.9	132	1005.4	10
2019	11	27	23	50	136	5	5.9	0.68	3.13	3.74	81	1002.9	10.6
2019	11	28	0	50	165	5.5	6.3	0.65	3.45	3.67	98	1001.7	10.3
2019	11	28	1	50	183	4.2	5	0.68	3.57	3.65	107	999.5	10.3
2019	11	28	2	50	214	6.4	7.5	0.65	3.85	3.78	117	998	10.2
2019	11	28	3	50	240	6.8	8.5	0.72	4.17	3.75	92	997.7	10.4
2019	11	28	4	50	245	7.5	8.8	0.76	3.57	3.77	214	996.8	10
2019	11	28	5	50	250	8.4	10	0.75	4	3.59	213	995.8	10.2
2019	11	28	6	50	286	13	16.1	0.78	3.13	3.29	261	994.7	10
2019	11	28	7	50	316	8.6	9.8	1.06	3.85	3.58	291	996.4	7.8
2019	11	28	8	50	315	9	11	0.99	4	3.64	289	996.4	6.9
2019	11	28	9	50	299	12.8	15.4	1.1	4.17	3.69	314	996	7.1
2019	11	28	10	50	298	15.4	19.4	1.73	4.55	4.3	312	996.1	6.4
2019	11	28	11	50	295	15.3	18.4	1.93	5.56	4.59	308	996.5	6
2019	11	28	12	50	311	14.5	17.4	2.2	5.56	4.99	309	996.9	5.2
2019	11	28	13	50	313	15.1	18.3	2.22	5.88	5.03	334	997.7	5
2019	11	28	14	50	328	15.5	19	2.62	6.25	5.2	338	998.5	4.8
2019	11	28	15	50	342	15.2	19	2.71	6.67	5.39	1	999.2	4.7
2019	11	28	16	50	344	16.3	20.4	3.25	7.69	5.83	9	1000.1	4.6
2019	11	28	17	50	347	16.9	20.5	3.61	7.14	6.13	11	1001	4.9
2019	11	28	18	50	344	17.6	21.8	4.26	8.33	6.82	25	1002	5.2
2019	11	28	19	50	344	16.3	20	4.03	9.09	6.74	28	1004.1	5.8
2019	11	28	20	50	340	16.1	20.8	4.23	8.33	7.03	27	1005.8	6.3
2019	11	28	21	50	343	16.4	20.3	4.28	9.09	6.97	34	1007.5	6.5
2019	11	28	22	50	344	17.4	20.9	4.15	10	6.9	37	1008.7	6.2
2019	11	28	23	50	338	15.9	19.5	3.94	10	6.69	46	1010.2	6
2019	11	29	0	50	341	16	19.7	3.98	9.09	6.68	40	1011.2	5.7
2019	11	29	1	50	342	15.4	18.4	3.81	10.81	6.74	59	1012.4	5.2
2019	11	29	2	50	339	15.9	19.3	3.96	10	6.84	52	1013.3	5.1
2019	11	29	3	50	328	16.2	20	4.16	10	6.96	52	1014	4.4
2019	11	29	4	50	336	15.2	18.3	4.01	10.81	6.77	65	1014.5	4.2
2019	11	29	5	50	336	14.9	18.7	3.78	10	6.66	59	1015.1	4.6
2019	11	29	6	50	337	14.5	17.7	3.91	10.81	6.81	63	1015.3	4.2
2019	11	29	7	50	328	13.6	16.2	3.84	10.81	6.79	53	1015.7	3.9
2019	11	29	8	50	340	14.7	17.5	3.61	10	6.62	55	1015.3	3.8
2019	11	29	9	50	343	13.3	16	3.51	9.09	6.37	55	1016	4.2
2019	11	29	10	50	347	13.6	16.5	3.26	7.69	6.15	41	1016.6	4.3
2019	11	29	11	50	348	13.4	16.8	3.17	10	6.39	61	1016.9	4.2
2019	11	29	12	50	338	13.3	15.4	3.09	10	6.26	49	1017.8	3.8
2019	11	29	13	50	339	12.8	15.5	3.25	10	6.58	64	1017.7	3.7
2019	11	29	14	50	334	12.9	15.3	3.02	8.33	6.3	55	1017.3	3.3
2019	11	29	15	50	338	11.7	14.8	2.86	9.09	6.22	59	1016.9	3.4
2019	11	29	16	50	333	12.3	14.8	3.19	10	6.57	56	1016	3.3
2019	11	29	17	50	306	11	14	3.15	8.33	6.53	55	1016	3.2
2019	11	29	18	50	309	11.3	14.1	3.06	9.09	6.64	55	1015.1	4.2
2019	11	29	19	50	314	11.9	14.3	3.06	11.43	6.61	78	1015	4.1
2019	11	29	20	50	307	11.4	13.6	2.82	11.43	6.03	82	1015.2	4
2019	11	29	21	50	317	12.8	15.2	3	9.09	6.12	56	1015.1	3.9
2019	11	29	22	50	311	14.6	17.1	3.31	9.09	6.27	61	1014.6	3.4
2019	11	29	23	50	319	14.5	17	2.98	8.33	5.95	52	1014.9	3.2
2019	11	30	0	50	329	13.9	17.2	3	6.67	6.07	360	1014.7	2.6
2019	11	30	1	50	325	12.1	15	2.92	6.67	6.14	348	1015.1	2.2
2019	11	30	2	50	332	12.8	15.2	2.78	6.67	5.94	351	1014.5	2
2019	11	30	3	50	326	12.3	15.1	2.68	6.67	5.9	9	1014	1.5
2019	11	30	4	50	322	11.8	14.4	2.72	7.14	6.16	18	1013.3	1.3
2019	11	30	5	50	320	10.6	13.5	2.33	6.67	5.52	5	1012.9	1
2019	11	30	6	50	316	10.5	13	2.47	6.25	5.57	355	1013.4	0.6
2019	11	30	7	50	322	10.8	13.5	2.45	11.43	5.64	98	1013.1	0.2
2019	11	30	8	50	312	10.5	13.6	2.36	6.25	5.43	17	1012.9	-0.3
2019	11	30	9	50	316	11.3	13.4	2.25	6.25	5.52	24	1013.2	-0.6
2019	11	30	10	50	315	10.8	13.5	2.24	6.67	5.4	36	1013.2	-0.8
2019	11	30	11	50	313	10.2	12.7	2.19	6.25	5.22	22	1013.5	-0.9
2019	11	30	12	50	311	11.5	14.3	2.11	5.88	5.21	344	1013.2	-0.6
2019	11	30	13	50	310	10.9	13.1	1.89	7.14	4.98	35	1013	-1
2019	11	30	14	50	308	10.1	12.2	1.99	5.56	5.21	334	1013.2	-0.9
2019	11	30	15	50	310	10.3	13.4	1.9	6.25	5.23	4	1012.9	-0.5
2019	11	30	16	50	307	11.1	13.4	1.97	5.26	5.23	325	1011.9	0.1
2019	11	30	17	50	314	11.2	14	2.14	5.26	5.31	337	1011.1	0.8
2019	11	30	18	50	308	10.9	13.1	2.26	7.69	5.33	53	1010.8	1.3
2019	11	30	19	50	305	10.8	13	2.02	5.88	5.1	3	1010.8	1.7
2019	11	30	20	50	306	11.4	13.6	1.93	5.56	4.95	352	1010.8	1.9
2019	11	30	21	50	318	12.5	15.1	1.85	5.26	4.74	339	1011.1	1.8
2019	11	30	22	50	305	11.3	13.8	1.77	4.76	4.7	317	1011.9	1.4
2019	11	30	23	50	314	11.4	14.1	1.8	4.76	4.7	314	1012.7	0.6
2019	12	1	0	50	325	11.2	13.6	1.82	5.56	4.72	352	1013.1	0.4
2019	12	1	1	50	337	10.5	12.8	1.75	5.88	4.84	348	1013.3	0.1
2019	12	1	2	50	338	9.4	11.6	1.56	5.88	4.78	353	1013.4	-0.2
2019	12	1	3	50	331	7.1	8.9	1.51	6.67	4.79	7	1014.2	-0.1
2019	12	1	4	50	342	6.8	9	1.45	5.88	4.93	358	1013.9	-0.3
2019	12	1	5	50	337	6.3	8.3	1.27	6.25	4.72	10	1014	-0.4
2019	12	1	6	50	328	5.7	8.4	1.22	6.25	4.73	17	1015.4	-0.2
2019	12	1	7	50	343	6.4	8.4	1.24	5.88	4.61	17	1014.9	0.2
2019	12	1	8	50	358	5	7.1	1.18	6.25	4.47	41	1015.4	0.4
2019	12	1	9	50	20	4.7	6.8	1.12	5.56	4.54	18	1015.3	0.7
2019	12	1	10	50	17	3.2	4.8	1.19	5.88	4.76	38	1016.5	0.7
2019	12	1	11	50	17	1.9	3.3	1.13	5.56	4.68	38	1016.5	0.9
2019	12	1	12	50	359	1.1	2.4	1.05	5.88	4.62	37	1016.8	0.9
2019	12	1	13	50	76	1.8	3	0.92	6.25	4.53	41	1016.8	1.1
2019	12	1	14	50	5	1.9	3.1	0.96	6.25	4.71	35	1017.1	1.5
2019	12	1	15	50	31	4.3	5.8	0.82	5.88	4.65	35	1015.8	1.7
2019	12	1	16	50	51	3.9	5.2	0.8	6.25	4.66	43	1015.1	1.9
2019	12	1	17	50	80	3.1	4.9	0.82	6.25	4.66	39	1014.5	2.1
2019	12	1	18	50	85	5	6	0.79	5.56	4.71	36	1013.1	2.3
2019	12	1	19	50	123	3.7	4.8	0.72	5.88	4.46	31	1014.4	2.8
2019	12	1	20	50	133	2.1	3.6	0.76	6.67	4.94	50	1014.2	3
2019	12	1	21	50	147	4.1	5.9	0.74	5	4.66	24	1013.6	3.3
2019	12	1	22	50	95	6.5	8	0.77	5.56	4.75	50	1011.8	3.9
2019	12	1	23	50	90	8	9.7	0.89	6.67	4.47	58	1011.6	4.2
2019	12	2	0	50	90	9.2	11.8	0.87	3.45	4.04	75	1010.6	4.3
2019	12	2	1	50	76	11.2	13.8	1.12	4	4.02	73	1009.3	4
2019	12	2	2	50	71	13.5	16.1	1.45	4.35	4.1	69	1007.8	3
2019	12	2	3	50	64	13.6	15.8	1.82	5.26	4.53	66	1006.7	3.2
2019	12	2	4	50	59	13.8	17.5	2.05	6.25	4.75	57	1006.1	3.5
2019	12	2	5	50	58	15.2	18.7	2.35	6.25	5.01	66	1004.6	3.5
2019	12	2	6	50	61	15.7	19.1	2.67	6.67	5.38	67	1003.1	4.1
2019	12	2	7	50	60	16.3	19.4	3.25	7.14	5.86	73	1001.4	4.3
2019	12	2	8	50	60	15.8	20.1	3.41	7.69	6.13	70	1000.9	4.4
2019	12	2	9	50	60	17	20	3.73	8.33	6.51	85	999.5	4.7
2019	12	2	10	50	60	15.9	19	4.25	8.33	6.87	91	999.7	5.1
2019	12	2	11	50	59	15.5	19	4.31	8.33	6.95	88	999.8	5.4
2019	12	2	12	50	54	14.3	18.4	4.33	9.09	7.11	93	1000.2	5.9
2019	12	2	13	50	52	14.9	17.5	4.54	10	7.2	91	1000.2	5.9
2019	12	2	14	50	51	15.3	18.9	4.33	9.09	7.27	87	1000.1	6.1
2019	12	2	15	50	45	15.2	18.8	5.01	10	7.39	78	999.6	6
2019	12	2	16	50	47	15.7	19.9	4.78	10	7.37	78	998.9	5.7
2019	12	2	17	50	42	15.9	20.8	5.16	9.09	7.52	88	997.7	5.7
2019	12	2	18	50	47	15.3	18.5	4.87	10.81	7.56	99	997.7	5.8
2019	12	2	19	50	44	15.5	19.1	5.48	10.81	8.04	95	997.4	5.6
2019	12	2	20	50	39	15.5	20.2	5.41	10.81	8.02	90	997.1	5.7
2019	12	2	21	50	38	16.9	20.3	5.81	11.43	8.38	89	996.7	5.6
2019	12	2	22	50	37	16.3	21.1	6.02	11.43	8.4	89	996.7	5.7
2019	12	2	23	50	36	16.5	20.3	5.74	11.43	8.29	78	996.3	5.9
2019	12	3	0	46	33	16.2	20.1	5.76	11.43	8.23	87	996.1	5.7
2019	12	3	1	50	36	16.5	20.4	5.13	10.81	7.61	90	995	5.6
2019	12	3	2	50	36	17.5	21.3	5.6	12.12	8.07	93	994.6	5.4
2019	12	3	3	50	35	16.8	21.7	5.24	10.81	7.77	83	994.1	5.3
2019	12	3	4	50	33	16	19.1	5.2	11.43	7.88	65	993.1	5.3
2019	12	3	5	50	33	16.7	20.7	5.41	11.43	7.95	78	992.3	5.4
2019	12	3	6	50	15	16.2	19.6	5.94	11.43	8.08	85	991.7	4.5
2019	12	3	7	50	17	17	20.7	5.21	11.43	7.83	86	991.1	4.3
2019	12	3	8	50	12	16.6	20.2	5.97	12.12	8.2	88	990.3	3.9
2019	12	3	9	50	3	16.2	20	5.78	12.12	8.31	85	989.8	2.9
2019	12	3	10	50	357	15.7	19.8	5.62	10	8.17	64	990	2.2
2019	12	3	11	50	356	15	19.4	5.71	11.43	8.33	76	990.3	1.4
2019	12	3	12	50	349	14.2	17.1	5.3	12.12	8.09	75	990.4	1.2
2019	12	3	13	50	340	14.7	18	5.54	12.12	8.32	78	989.9	0.9
2019	12	3	14	50	334	14.7	17.6	4.82	11.43	7.7	74	989.7	0.8
2019	12	3	15	50	332	14	16.8	4.62	11.43	7.71	67	988.8	1.3
2019	12	3	16	50	331	13.4	16.4	4.98	10.81	8.01	68	988.1	1.7
2019	12	3	17	50	323	13	16.6	4.08	11.43	7.19	75	987.6	1.6
2019	12	3	18	50	319	13	15.6	4.37	10.81	7.37	69	987.8	2
2019	12	3	19	50	304	13.8	16.5	4.16	11.43	7.29	60	988.4	1.4
2019	12	3	20	50	300	14.6	18.1	4.68	10.81	7.61	67	989	2.1
2019	12	3	21	50	302	14.3	17.9	4.52	11.43	7.35	66	990.6	1.9
2019	12	3	22	50	308	15.2	17.7	4.51	11.43	7.06	58	991.3	1.8
2019	12	3	23	50	309	13.6	17	4.28	10	7.07	41	992.7	2
2019	12	4	0	50	320	12.9	15.9	3.91	10.81	6.74	47	993.3	2.2
2019	12	4	1	50	307	11.7	14.1	3.89	10.81	7	46	993.8	1.9
2019	12	4	2	50	299	11.9	15.3	3.51	10	6.73	54	993.9	2.1
2019	12	4	3	50	302	11.5	13.9	2.92	10	6.31	49	994.6	2.1
2019	12	4	4	50	301	9.6	11.4	2.65	9.09	6.17	42	995.4	2.2
2019	12	4	5	50	295	8.6	11.8	2.38	10	6.02	53	996.5	1.8
2019	12	4	6	50	284	9.4	11.3	2.19	10	5.85	62	997.4	1.7
2019	12	4	7	50	296	9.6	11.7	2	8.33	5.62	46	997.2	1.7
2019	12	4	8	50	300	9.3	11	2.08	8.33	5.6	39	997.3	2
2019	12	4	9	50	293	8.9	10.9	1.98	9.09	5.45	56	997.8	2.1
2019	12	4	10	50	294	7.9	9.6	1.9	9.09	5.38	42	998.5	2.5
2019	12	4	11	50	291	6.3	7.9	1.6	8.33	5.06	51	999	2.4
2019	12	4	12	50	245	5	6.4	1.58	8.33	5.35	46	999.7	1.8
2019	12	4	13	50	231	5.5	7.8	1.49	8.33	5.49	49	999.5	2
2019	12	4	14	50	243	6.1	7.8	1.25	7.69	5.28	48	999.9	2.1
2019	12	4	15	50	232	5.8	8.1	1.14	8.33	5.11	58	999.7	2.4
2019	12	4	16	50	249	5	6.3	1.01	7.69	4.92	70	998.8	2.3
2019	12	4	17	50	252	5.5	7.2	0.88	8.33	4.74	64	998.3	2.6
2019	12	4	18	50	240	5.7	6.9	0.85	7.69	4.8	61	998.1	2.6
2019	12	4	19	50	243	5	6.4	0.74	9.09	4.49	86	997.9	2.8
2019	12	4	20	50	249	3.8	4.8	0.8	3.57	4.59	266	997.8	3.1
2019	12	4	21	50	242	3.5	4.4	0.75	10.81	4.57	106	997.8	3.4
2019	12	4	22	50	240	4.5	6.2	0.69	10.81	4.42	99	997.9	3.8
2019	12	4	23	50	250	5.3	6.9	0.66	10.81	4.31	114	998.1	3.8
2019	12	5	0	50	260	5.4	6.7	0.62	10	4.1	91	997.9	4
2019	12	5	1	50	246	6	8	0.61	8.33	3.7	100	997.8	4.1
2019	12	5	2	50	256	6.2	7.3	0.61	9.09	3.81	109	997.8	4.1
2019	12	5	3	50	275	4.6	6	0.69	3.33	3.82	253	997.9	3.8
2019	12	5	4	50	266	5.5	6.8	0.59	3.23	3.8	247	997.7	4
2019	12	5	5	50	265	6.6	7.8	0.55	8.33	3.95	96	997.4	4
2019	12	5	6	50	271	6.2	7.6	0.66	3.45	3.83	304	997.6	4.1
2019	12	5	7	50	271	6.1	7.2	0.72	4.35	3.89	298	997.8	3.8
2019	12	5	8	50	281	6.6	8.1	0.67	4	3.75	303	997.8	3.9
2019	12	5	9	50	264	6.6	8.1	0.7	4	3.86	292	998.2	4.1
2019	12	5	10	50	279	7.5	8.8	0.66	3.85	3.62	292	998.9	4.2
2019	12	5	11	50	284	8.2	9.6	0.8	3.45	3.57	297	999.4	4.2
2019	12	5	12	50	278	8.9	11	0.9	4.17	3.54	288	1000.1	4.4
2019	12	5	13	50	279	8.4	10.1	1.01	3.85	3.66	288	1000.9	4.2
2019	12	5	14	50	278	9.2	10.6	0.94	4.35	3.61	299	1001.1	4.4
2019	12	5	15	50	282	9.7	11.7	1.04	4.35	3.83	307	1001.3	4.8
2019	12	5	16	50	285	9.8	12.1	1.16	4.55	3.82	308	1001.4	5
2019	12	5	17	50	283	9.8	11.9	1.2	4.76	4.02	298	1001.5	5.4
2019	12	5	18	50	280	9.3	11.5	1.09	4.76	4.16	295	1002.1	5.7
2019	12	5	19	50	277	9.7	12.6	1.16	4.76	4.12	290	1002.9	5.8
2019	12	5	20	50	278	10.6	13.5	1.32	5.26	4.28	287	1003.8	5.8
2019	12	5	21	50	280	10.9	12.6	1.49	5.26	4.33	285	1005	5.5
2019	12	5	22	50	279	12.9	16.2	1.54	5.26	4.36	296	1006.2	5
2019	12	5	23	50	277	13	16	1.72	5.56	4.58	292	1007.5	4.6
2019	12	6	0	50	272	11.5	14.2	1.85	5.88	4.49	292	1008.5	4
2019	12	6	1	50	280	12	15.3	1.71	5.56	4.4	291	1009.2	3.2
2019	12	6	2	50	288	12.4	14.9	1.73	5	4.3	292	1010	3
2019	12	6	3	50	290	11.9	14	1.75	5.26	4.44	292	1011.2	2.4
2019	12	6	4	50	295	11.8	14.6	1.84	5.56	4.54	296	1012.5	1.8
2019	12	6	5	50	288	11.8	14	1.76	5.56	4.5	295	1013.5	1.2
2019	12	6	6	50	287	11.8	15.3	1.88	5.56	4.61	304	1014.7	0.6
2019	12	6	7	50	286	12.5	15.8	1.84	5.56	4.71	309	1015.6	0.5
2019	12	6	8	50	287	12.4	14.7	1.94	6.25	4.85	297	1015.8	0.4
2019	12	6	9	50	282	10.4	12.7	1.85	5.88	4.85	290	1016.2	0.6
2019	12	6	10	50	273	10.3	12.6	1.78	5.26	4.62	300	1017	0.7
2019	12	6	11	50	269	9.1	11.4	1.61	5.26	4.44	307	1017.5	0.7
2019	12	6	12	50	270	9.6	13	1.64	5	4.33	301	1017.5	0.7
2019	12	6	13	50	266	9.1	12.3	1.35	4.17	4.01	301	1018.3	0.6
2019	12	6	14	50	267	8.9	11.3	1.14	4.35	3.74	307	1018.6	0.9
2019	12	6	15	50	254	8.2	9.9	0.98	4.35	3.67	304	1018.1	0.9
2019	12	6	16	50	245	7.8	9.8	0.9	3.85	3.63	266	1017.3	1.6
2019	12	6	17	50	235	8.2	10.1	0.81	3.57	3.59	271	1016.7	2
2019	12	6	18	50	236	7	9	0.8	4.17	3.68	246	1016.6	2.1
2019	12	6	19	50	210	5.9	7.5	0.73	3.7	3.8	254	1015.6	3
2019	12	6	20	50	202	5.3	7.5	0.6	3.85	3.73	238	1015.2	2.7
2019	12	6	21	50	169	4.1	5.4	0.5	3.7	3.9	251	1014.5	3.4
2019	12	6	22	50	115	3.3	4.2	0.42	3.7	3.86	238	1013.9	3.7
2019	12	6	23	50	124	3.6	4.7	0.38	3.45	3.83	234	1012.8	4.5
2019	12	7	0	50	142	0.8	1.4	0.37	9.09	3.83	125	1012.5	5.3
2019	12	7	1	50	266	9.5	10.9	0.36	10	3.99	110	1012.5	6.7
2019	12	7	2	50	280	11.8	14.1	0.64	2.74	2.89	272	1012.9	5.8
2019	12	7	3	50	301	12.2	14.5	1.02	3.57	3.38	289	1014.5	3.4
2019	12	7	4	50	315	11.9	14.4	1.24	4	3.74	301	1015.6	2.6
2019	12	7	5	50	315	12	16.1	1.28	4.55	3.94	307	1016.6	2
2019	12	7	6	50	317	11.8	14.1	1.36	4.55	3.97	323	1017.9	1.6
2019	12	7	7	50	312	12.6	15.1	1.58	5.26	4.28	345	1018.7	1.5
2019	12	7	8	50	312	12	14.2	1.97	5.56	4.84	339	1019.4	0.5
2019	12	7	9	50	320	10	11.8	1.93	5.56	4.85	322	1020.4	0.1
2019	12	7	10	50	314	10.5	13.1	1.83	5.88	4.8	329	1021.5	-0.3
2019	12	7	11	50	320	10	12	1.78	5.88	4.83	338	1022.6	-0.9
2019	12	7	12	50	313	9.3	11.5	1.87	5.88	4.75	332	1023.6	-1.1
2019	12	7	13	50	315	7.7	9.4	1.87	5.88	4.73	355	1024.5	-0.6
2019	12	7	14	50	315	7.6	9.4	1.48	5.26	4.39	341	1025.2	-0.5
2019	12	7	15	50	317	5.5	7.3	1.33	5.88	4.4	28	1025.3	-0.8
2019	12	7	16	50	304	6.6	8.7	1.15	5.26	4.33	9	1025.3	-0.8
2019	12	7	17	50	294	5.6	7.5	0.98	5.26	4.13	15	1025.4	-0.7
2019	12	7	18	50	308	5.3	7.1	0.87	5.26	4.25	19	1025.7	-0.3
2019	12	7	19	50	316	5.7	7.6	0.76	4.76	4.23	339	1026.1	0
2019	12	7	20	50	308	7.3	9.8	0.71	4.55	4.01	346	1026.7	0.1
2019	12	7	21	50	305	7.5	9.2	0.82	4	3.75	311	1027.2	0.4
2019	12	7	22	50	289	9.3	11.6	0.85	4.17	3.74	327	1027.7	0.4
2019	12	7	23	50	305	8.9	11.6	1.05	4.17	3.95	316	1028.3	0.1
2019	12	8	0	50	306	8.7	11.2	1.27	4.76	4.11	326	1029	-0.2
2019	12	8	1	50	311	9.4	11.3	1.36	4.76	4.15	313	1029.4	-0.5
2019	12	8	2	50	312	9.8	13.9	1.47	4.35	4.22	319	1029.8	-0.3
2019	12	8	3	50	313	9.5	12	1.46	5.26	4.18	345	1030.2	-0.6
2019	12	8	4	50	307	9.5	12.2	1.44	5.26	4.26	343	1030.6	-0.9
2019	12	8	5	50	310	7.7	9.9	1.44	5.26	4.25	352	1031	-1.1
2019	12	8	6	50	315	7.3	9	1.35	5.88	4.39	356	1031.7	-1.4
2019	12	8	7	50	319	5.8	7.5	1.1	5.56	4.34	348	1032	-1.5
2019	12	8	8	50	302	5	7.1	1.03	5.56	4.27	341	1032.3	-1.4
2019	12	8	9	50	297	5.5	6.9	0.86	5.26	4.1	341	1032.4	-1.4
2019	12	8	10	50	303	4.5	7.2	0.87	5.26	4.08	341	1032.7	-1.6
2019	12	8	11	50	286	4.1	5.6	0.86	5.26	4.03	340	1033.4	-1.6
2019	12	8	12	50	281	4.4	6	0.7	4.76	3.8	345	1034	-1.3
2019	12	8	13	50	278	2.6	3.6	0.65	4.35	3.76	348	1034.2	-0.9
2019	12	8	14	50	235	3.2	5.3	0.56	3.85	3.66	344	1034.2	-0.6
2019	12	8	15	50	227	4.7	6.7	0.52	3.7	3.7	346	1033.9	-0.7
2019	12	8	16	50	200	5.1	6.9	0.44	4	3.63	7	1033.1	-0.2
2019	12	8	17	50	201	5.7	7	0.39	2.25	3.12	210	1032.3	0.3
2019	12	8	18	50	186	6.2	8.2	0.42	2.6	3.03	210	1031.6	1.2
2019	12	8	19	50	201	7.9	10.1	0.5	3.33	3.21	215	1031.3	1.7
2019	12	8	20	50	212	8.7	11	0.65	3.57	3.42	221	1031.4	2.3
2019	12	8	21	50	201	10	12.1	0.88	4.35	3.85	225	1031.4	2.9
2019	12	8	22	50	200	10.2	11.9	0.89	4.55	4	227	1031.1	3.2
2019	12	8	23	50	189	10.3	12.7	0.97	5	4	227	1030.3	3.7
2019	12	9	0	50	191	10.7	12.5	0.95	4.76	3.81	225	1029.8	4.3
2019	12	9	1	50	182	10.6	12.7	1.06	4.76	3.8	211	1029	4.9
2019	12	9	2	50	186	11.5	14.4	1.09	4.35	3.7	204	1028.2	5.4
2019	12	9	3	50	186	11.6	13.6	1.12	3.85	3.65	190	1027.8	5.9
2019	12	9	4	50	188	12.5	14.8	1.13	4.35	3.7	199	1026.9	6.4
2019	12	9	5	50	192	12.2	15.6	1.13	3.85	3.72	193	1026.5	6.9
2019	12	9	6	50	190	11.2	13.5	1.13	3.85	3.73	194	1026.3	7.3
2019	12	9	7	50	177	8.8	10.9	0.87	4	3.6	198	1025.9	6.8
2019	12	9	8	50	190	8.4	10.6	0.8	3.57	3.46	175	1025.7	7.3
2019	12	9	9	50	189	8.5	9.7	0.75	3.57	3.54	192	1025.4	7.5
2019	12	9	10	50	178	7.6	8.8	0.68	2.94	3.46	172	1024.8	7.5
2019	12	9	11	50	177	6.9	8.1	0.6	2.94	3.47	172	1024.7	7.8
2019	12	9	12	50	175	8	10	0.59	2.94	3.34	174	1023.9	8.2
2019	12	9	13	50	177	9	10.4	0.68	3.33	3.24	180	1023.6	8.5
2019	12	9	14	50	165	7.4	8.7	0.73	3.45	3.29	165	1023.2	8.1
2019	12	9	15	50	164	7.8	8.8	0.57	5.56	3.22	105	1021.5	8.8
2019	12	9	16	50	174	10.8	12.4	0.67	3.45	3.39	130	1019.8	9.4
2019	12	9	17	50	171	11.6	13.6	0.95	3.23	3.56	166	1017.8	9.6
2019	12	9	18	50	176	10.6	12.2	1.07	6.25	3.77	102	1017.7	9.8
2019	12	9	19	50	168	10.2	12.1	1.15	5.88	4.12	107	1016.3	9.6
2019	12	9	20	50	164	10.8	12.6	1.06	6.25	4.09	111	1014.8	10.2
2019	12	9	21	50	166	12.1	14	1.24	6.25	4.29	120	1013.3	10.5
2019	12	9	22	50	186	10.2	13.2	1.21	4.55	4.21	133	1012.8	10.3
2019	12	9	23	50	187	12.9	16.7	1.3	4.17	4.05	140	1011.1	11.1
2019	12	10	0	50	193	9.9	11.8	1.52	4.35	4.18	177	1010.6	11.3
2019	12	10	1	50	174	9.6	11.2	1.44	3.85	4.21	177	1009.4	10.5
2019	12	10	2	50	174	11.7	13.7	1.15	7.69	4.09	117	1007.4	10.8
2019	12	10	3	50	186	12.6	15	1.31	3.7	3.96	178	1006.5	11.5
2019	12	10	4	50	190	13.3	15.4	1.51	7.69	4.26	118	1005.7	11.9
2019	12	10	5	50	201	13.2	15.4	1.55	4.55	4.35	183	1005.3	11.8
2019	12	10	6	50	208	12.7	15	1.7	8.33	4.62	109	1005.8	11.2
2019	12	10	7	50	202	13	16.6	1.49	8.33	4.57	110	1005.3	10.9
2019	12	10	8	50	206	12.7	15.3	1.71	8.33	4.83	117	1005.4	10.8
2019	12	10	9	50	203	11.3	13.6	1.56	7.69	4.75	114	1006	10.3
2019	12	10	10	50	202	9.6	11	1.33	9.09	4.81	112	1006.7	9.8
2019	12	10	11	50	201	10.2	12	1.23	9.09	4.74	130	1006.8	10
2019	12	10	12	50	201	9.8	11.8	1.25	10	4.91	124	1007	10.1
2019	12	10	13	50	205	10.4	12.4	1.32	9.09	5.08	108	1007.2	10.4
2019	12	10	14	50	202	10.7	12.5	1.46	10	4.94	113	1007.6	10.3
2019	12	10	15	50	198	10	11.1	1.36	10.81	4.78	97	1007.5	10.3
2019	12	10	16	50	194	9.6	11.1	1.33	10	4.98	105	1006.1	10.3
2019	12	10	17	50	202	11.4	13.2	1.45	10	5.3	102	1005.9	10.3
2019	12	10	18	50	206	11.4	12.9	1.48	9.09	5.25	99	1006.2	9.9
2019	12	10	19	50	212	9.4	10.7	1.53	9.09	5.37	100	1007.8	9.6
2019	12	10	20	50	203	7.5	8.6	1.53	10.81	5.77	105	1007.8	9.2
2019	12	10	21	50	201	9.1	10.7	1.45	9.09	5.92	120	1008.2	9.7
2019	12	10	22	50	195	9.2	11.1	1.44	10.81	5.8	96	1008.9	9.8
2019	12	10	23	50	203	8.2	9.1	1.38	10.81	5.42	107	1010.2	9.6
2019	12	11	0	50	205	7.8	9.2	1.29	12.12	5.49	72	1011.3	9.4
2019	12	11	1	50	286	7.8	9.4	1.28	11.43	5.86	110	1012.4	9.1
2019	12	11	2	50	303	7.3	9.1	1.37	10	5.94	121	1013.8	7.8
2019	12	11	3	50	308	10.4	12.8	1.43	10.81	5.02	114	1015.4	6.5
2019	12	11	4	50	313	9.7	11.6	1.51	10.81	4.79	114	1015.7	5.8
2019	12	11	5	50	304	7.8	9.4	1.55	10	4.99	117	1017.1	4.9
2019	12	11	6	50	291	8.4	9.9	1.38	10.81	4.9	110	1017.6	4.5
2019	12	11	7	50	325	11.5	13.1	1.33	11.43	5.03	103	1018	3.1
2019	12	11	8	50	317	13.1	15.4	1.49	10.81	4.47	129	1018.9	2.4
2019	12	11	9	50	310	11.9	13.5	1.66	5.56	4.78	341	1020.2	1.9
2019	12	11	10	50	309	10.9	12.9	1.61	5.88	4.76	334	1020.9	0.9
2019	12	11	11	50	310	8.8	11.1	1.65	5.56	5	321	1021.3	0.2
2019	12	11	12	50	304	7.7	9.2	1.51	5.56	4.93	317	1022.1	0.2
2019	12	11	13	50	307	7.8	9.2	1.39	5	4.8	316	1023.1	-0.2
2019	12	11	14	50	300	8.2	9.7	1.14	5	4.53	321	1023.5	-0.4
2019	12	11	15	50	297	6.5	8.4	1.16	10	4.59	120	1023	-0.7
2019	12	11	16	50	282	7.6	9.6	1.09	10	4.43	114	1022.7	-0.6
2019	12	11	17	50	313	6.3	7.5	0.94	10.81	4.43	106	1022.5	-0.7
2019	12	11	18	50	302	3.8	5.7	0.89	10	4.61	115	1022	-0.7
2019	12	11	19	50	269	3.4	4.9	0.88	10.81	4.96	94	1022.4	-1.1
2019	12	11	20	50	267	3.5	5.8	0.81	9.09	5.05	98	1022.7	-1.1
2019	12	11	21	50	256	5.7	8.3	0.86	10.81	5.32	86	1023.3	-1.2
2019	12	11	22	50	256	7.3	9.6	0.96	10	5.03	116	1024.1	-0.8
2019	12	11	23	50	265	8.6	10.5	0.92	10	4.67	125	1024.5	0.4
2019	12	12	0	50	259	9.5	11.6	1.04	10	4.43	106	1025.1	0.9
2019	12	12	1	50	262	9.2	10.5	1.27	4.55	4.62	279	1025.4	1.4
2019	12	12	2	50	249	8	9.8	1.16	4.55	4.41	269	1025.5	1.5
2019	12	12	3	50	261	10.3	13.2	1.28	4.35	4.26	277	1025.8	1.8
2019	12	12	4	50	276	11.6	14.9	1.34	4.17	4.05	272	1026.4	1.6
2019	12	12	5	50	293	14.1	17.6	1.43	4.17	3.91	277	1027.1	1.7
2019	12	12	6	50	285	13.6	16.8	1.88	5.26	4.31	300	1029.3	1.1
2019	12	12	7	50	297	12	14.8	1.92	5.26	4.46	299	1030.5	0.2
2019	12	12	8	50	303	13.9	16.7	1.72	5.56	4.52	291	1030.9	-0.3
2019	12	12	9	50	300	13.1	16.8	1.69	5.56	4.37	295	1032.6	-0.5
2019	12	12	10	50	307	13.3	16.5	1.89	5.88	4.8	297	1034.1	-0.7
2019	12	12	11	50	296	12.5	16.7	2.11	5.88	5.05	311	1035.4	-1.4
2019	12	12	12	50	305	11.6	15.9	1.87	5.56	4.96	303	1036.4	-1.7
2019	12	12	13	50	310	11.3	15.1	1.53	5.56	4.6	310	1037.6	-1.8
2019	12	12	14	50	303	11.3	14.4	1.57	5.26	4.52	300	1038.3	-1.9
2019	12	12	15	50	309	8.9	11.5	1.36	5.26	4.35	333	1038.6	-2
2019	12	12	16	50	300	7.3	9.9	1.28	4.55	4.15	299	1038.7	-1.8
2019	12	12	17	50	300	6.6	8.7	1.08	4.17	3.97	308	1038.7	-1.6
2019	12	12	18	50	301	7.2	8.9	0.97	4	3.84	312	1038.4	-1.1
2019	12	12	19	50	300	6.8	8.9	0.8	4	3.72	312	1038.8	-0.8
2019	12	12	20	50	292	5	6.7	0.69	4	3.55	317	1039.5	-0.8
2019	12	12	21	50	302	3.9	5.7	0.55	3.7	3.67	314	1039.8	-0.7
2019	12	12	22	50	285	3.2	4.3	0.53	9.09	4.02	110	1040.4	-0.5
2019	12	12	23	50	310	1.9	2.8	0.45	3.57	4.01	312	1040.6	-0.3
2019	12	13	0	50	349	1.1	1.6	0.43	9.09	4.18	117	1040.3	-0.1
2019	12	13	1	50	192	0.1	0.5	0.36	9.09	4.14	94	1040.1	0
2019	12	13	2	50	155	2.3	3.5	0.37	8.33	4.73	113	1039.7	0.3
2019	12	13	3	50	151	2.9	4.5	0.36	9.09	4.57	101	1039.4	0.6
2019	12	13	4	50	162	2.4	3.9	0.36	9.09	4.85	117	1039	0.6
2019	12	13	5	50	171	3.6	5.1	0.33	8.33	4.97	109	1038.3	0.8
2019	12	13	6	50	177	3.6	5.6	0.33	9.09	6.02	76	1038.3	1
2019	12	13	7	50	179	5.2	6.5	0.34	8.33	6.19	97	1038.1	1.4
2019	12	13	8	50	160	5.6	7	0.34	9.09	5.36	99	1037.2	1.8
2019	12	13	9	50	162	6.5	8.6	0.38	10	3.55	112	1036.6	2.2
2019	12	13	10	50	157	6.9	8.9	0.42	9.09	3.35	71	1035.7	2.9
2019	12	13	11	50	149	8.6	10.3	0.5	2.86	3.2	137	1034.4	3.8
2019	12	13	12	50	149	9.7	12.1	0.73	3.7	3.4	123	1033.5	4.7
2019	12	13	13	50	157	7.9	9.5	0.98	4.35	3.83	131	1033.2	4.8
2019	12	13	14	50	157	7.9	9.3	0.98	4.35	3.88	130	1032.6	5.5
2019	12	13	15	50	157	8	9.3	1.04	5	4.08	131	1032.1	5.9
2019	12	13	16	50	160	6.6	7.8	1.08	5.56	4.21	129	1031.1	6.4
2019	12	13	17	50	152	8	9.2	1.05	5.56	4.22	129	1030	6.9
2019	12	13	18	50	150	6.7	8.1	1.05	5.88	4.62	113	1029.3	7.1
2019	12	13	19	50	147	6.4	7.7	1.08	5.88	4.99	103	1028.8	7.3
2019	12	13	20	50	129	5.3	6.9	1.08	6.67	5.35	103	1028	7.4
2019	12	13	21	50	112	4.2	5.2	1.22	6.67	5.55	109	1027.8	7.6
2019	12	13	22	50	107	5.7	6.6	1.38	6.67	5.44	117	1026.7	7.8
2019	12	13	23	50	110	5.9	6.8	1.48	6.25	5.41	132	1025.8	8
2019	12	14	0	50	124	5.3	6.3	1.46	6.25	5.13	128	1025.2	8.1
2019	12	14	1	50	127	5.3	6.6	1.43	6.67	5.32	124	1023.9	8.1
2019	12	14	2	50	117	6.7	8	1.26	6.67	4.93	118	1022.2	8.5
2019	12	14	3	50	123	7.4	9.2	1.4	6.67	5.01	122	1021	8.8
2019	12	14	4	50	121	8.9	10.4	1.46	7.14	4.78	126	1019.3	8.9
2019	12	14	5	50	115	10.5	12.4	1.5	5.88	4.66	120	1017	9
2019	12	14	6	50	111	10	11.3	1.54	7.14	4.85	112	1015.5	9
2019	12	14	7	50	115	11.1	13.3	1.66	7.14	5.02	126	1013.2	9.3
2019	12	14	8	50	112	11.8	14.7	1.84	5.88	5.27	105	1010.4	9.8
2019	12	14	9	50	119	13.7	15.8	2.2	6.67	5.6	105	1007.7	10.1
2019	12	14	10	50	119	15.1	18.3	2.67	7.69	5.87	108	1005.3	10.1
2019	12	14	11	50	125	12.3	15.5	2.82	7.69	5.97	117	1004.1	10.2
2019	12	14	12	50	134	10.9	12.9	2.47	7.69	5.64	108	1003	10
2019	12	14	13	50	134	9.3	10.5	2.45	7.14	5.86	107	1001.4	9.8
2019	12	14	14	50	141	9.6	11.8	2.35	7.69	6.08	116	999.3	11
2019	12	14	15	50	141	10	11.7	2.16	8.33	6.01	123	995.2	10.9
2019	12	14	16	50	190	12.8	15.5	2.1	8.33	5.53	104	994.5	11.8
2019	12	14	17	50	184	5.8	6.6	2.37	8.33	5.75	104	994.3	10.8
2019	12	14	18	50	182	4.6	5.3	2.22	9.09	6.57	103	993.9	9.5
2019	12	14	19	50	169	5.9	6.8	2.04	9.09	7.01	106	993.1	9.7
2019	12	14	20	50	172	7.3	8.4	2.03	9.09	7.09	97	992.6	9.6
2019	12	14	21	50	169	6.8	7.7	1.89	10	6.56	111	992.1	9.7
2019	12	14	22	50	172	6.9	8.3	2.23	7.69	6.55	105	990.5	10.7
2019	12	14	23	50	173	5.2	6.3	2.16	8.33	6.43	100	989.5	10.3
2019	12	15	0	50	181	11.8	15.1	2.27	8.33	6.25	114	988.1	11.1
2019	12	15	1	50	185	10.7	12.5	2.17	9.09	5.75	109	987.3	10.9
2019	12	15	2	50	201	11.4	14.5	2.18	8.33	5.66	90	987.1	10
2019	12	15	3	50	201	12.7	15.9	2.02	9.09	5.59	98	987.1	9.5
2019	12	15	4	50	199	12.5	15	2.02	9.09	5.44	102	987.4	8.8
2019	12	15	5	50	210	11.6	13.7	2.02	9.09	5.41	90	988.3	8.6
2019	12	15	6	50	210	11.8	14.1	2.08	9.09	5.32	110	988.8	8.9
2019	12	15	7	50	224	12.3	14.7	1.91	8.33	5.18	108	989.5	8.5
2019	12	15	8	50	265	11.9	14.4	1.92	9.09	5.42	108	991.4	7.8
2019	12	15	9	50	253	13.6	17.5	1.99	4.17	4.73	275	992.4	7.1
2019	12	15	10	50	251	14.2	18.6	2.29	5.56	5.09	276	993.7	7
2019	12	15	11	50	257	14.6	18.4	2.12	5.56	5.27	282	994.8	6.8
2019	12	15	12	50	256	14.7	18.1	2.27	5.88	5.22	288	996.4	6.8
2019	12	15	13	50	256	13	16	2.19	6.25	5.37	286	998.2	6.9
2019	12	15	14	50	264	14.4	18.2	2.42	6.25	5.64	285	999.2	7.2
2019	12	15	15	50	261	13.5	16.4	2.28	6.67	5.52	277	999.9	7.2
2019	12	15	16	50	262	13.5	17	2.39	6.25	5.56	288	1000.2	7.4
2019	12	15	17	50	260	13.7	16.4	2.3	6.25	5.43	293	1000.9	7.9
2019	12	15	18	50	256	13.8	17	2.28	6.25	5.27	285	1001.7	7.8
2019	12	15	19	50	257	12.9	16.2	2.12	5.88	5.05	283	1003.1	7.6
2019	12	15	20	50	266	12	14.4	2.22	5.56	4.78	281	1004.6	7.3
2019	12	15	21	50	262	15.4	18	2.04	5.26	4.68	275	1005.5	6.8
2019	12	15	22	50	266	14.5	17.8	2.2	5.56	4.75	285	1007.5	6.2
2019	12	15	23	50	280	15.3	19.7	2.13	5.88	4.91	278	1009.3	5.3
2019	12	16	0	50	275	17.6	21.5	2.45	5.88	5.15	293	1010.3	4.1
2019	12	16	1	50	274	18.4	22.7	2.76	6.67	5.56	290	1011.2	3.6
2019	12	16	2	50	277	15.7	19.3	2.97	7.14	5.92	295	1012.7	3
2019	12	16	3	50	271	13.4	17	2.75	7.14	5.96	294	1014.6	2.5
2019	12	16	4	50	275	13.1	15.7	2.4	7.14	5.56	286	1015.4	1.9
2019	12	16	5	50	279	13.5	16.4	2.09	6.25	5.24	285	1015.8	1.4
2019	12	16	6	50	281	13.2	16.7	2.21	6.25	5.11	288	1017.1	1.1
2019	12	16	7	50	282	11.2	14	2.09	5.88	4.94	288	1018.6	1.2
2019	12	16	8	50	275	11.4	14.6	1.91	5.56	4.68	297	1019.5	0.7
2019	12	16	9	50	279	10.6	13	1.71	5.56	4.52	308	1020.1	0.6
2019	12	16	10	50	284	9.8	12.5	1.59	5.26	4.45	304	1020.5	0.5
2019	12	16	11	50	278	10.1	12.6	1.39	5	4.29	300	1021.3	0.6
2019	12	16	12	50	277	9.8	11.7	1.3	5	4.15	302	1022.2	0.4
2019	12	16	13	50	279	9.6	11.7	1.21	5	4.31	295	1022.7	0.3
2019	12	16	14	50	281	8.2	10.3	1.16	5	4.4	291	1023	0.1
2019	12	16	15	50	267	8.4	11.6	1.08	5	4.29	288	1022.9	0.3
2019	12	16	16	50	269	8.3	10.5	1.08	4.76	4.24	304	1022.1	0
2019	12	16	17	50	273	9.2	11.3	0.99	4.55	4.12	297	1021.5	0.3
2019	12	16	18	50	269	9.2	11.2	1.07	4.35	4.05	304	1021.5	0.4
2019	12	16	19	50	270	10	11.8	1.18	4.35	3.96	295	1021.9	0.6
2019	12	16	20	50	281	9.4	11.2	1.06	4.35	3.78	299	1022	0.8
2019	12	16	21	50	279	8.5	10.1	1.09	4.35	3.78	292	1022.3	0.9
2019	12	16	22	50	284	7.9	10.3	0.99	4.17	3.68	302	1022.7	1.1
2019	12	16	23	50	293	7.4	9.2	0.94	4.35	3.74	306	1022.8	1.2
2019	12	17	0	50	287	6.4	8.2	0.85	4.35	3.71	307	1022.7	1.3
2019	12	17	1	50	287	5.8	8	0.81	4.17	3.87	310	1022.8	1.4
2019	12	17	2	50	294	5.4	7	0.74	4.17	3.86	310	1022.3	1.2
2019	12	17	3	50	313	4.6	6.3	0.63	4.17	3.94	312	1022.4	0.9
2019	12	17	4	50	320	3.8	5.1	0.57	4.17	3.97	321	1021.4	0.6
2019	12	17	5	50	341	3.3	4.9	0.54	3.7	4	310	1020.9	0.7
2019	12	17	6	50	322	3.5	5.1	0.58	4.55	4.04	347	1020.8	0.5
2019	12	17	7	50	340	2.8	4.1	0.62	9.09	3.96	131	1020.8	0.4
2019	12	17	8	50	324	2.3	3.4	0.58	4	3.92	340	1019.8	0.6
2019	12	17	9	50	72	0.3	1.4	0.54	9.09	3.98	119	1019	0.7
2019	12	17	10	50	358	1.3	2.3	0.46	8.33	4.11	117	1019.1	0.5
2019	12	17	11	50	23	1.8	2.7	0.44	9.09	4.27	118	1018.5	-0.4
2019	12	17	12	50	58	3	4	0.4	9.09	4.38	114	1017.5	-0.3
2019	12	17	13	50	78	5.4	6.9	0.38	8.33	4.89	128	1015.4	0.6
2019	12	17	14	50	88	5.2	6.4	0.38	9.09	4.14	107	1014.4	1.5
2019	12	17	15	50	95	7.2	8.4	0.44	2.6	3.15	116	1012.5	2.5
2019	12	17	16	50	96	9	10.8	0.59	3.03	3.22	111	1009.6	2.8
2019	12	17	17	50	77	7.5	8.9	0.81	3.85	3.42	90	1008.8	3.3
2019	12	17	18	50	72	8.6	10.1	0.98	4.17	3.79	91	1006.9	3.8
2019	12	17	19	50	76	9.1	10.8	1.15	5	4.07	112	1005.8	4.2
2019	12	17	20	50	77	10	12.1	1.24	4.55	4.28	95	1004.2	4.7
2019	12	17	21	50	66	9.8	11.8	1.52	5.56	4.67	101	1003.6	4.8
2019	12	17	22	50	64	9.5	11	1.72	5.88	5.08	98	1003.1	5.1
2019	12	17	23	50	63	10.8	13.1	1.75	5.88	5.12	94	1002.2	5.1
2019	12	18	0	50	53	10.4	12.4	2.09	6.67	5.51	101	1001.6	5
2019	12	18	1	50	47	11	13.7	2.04	6.67	5.35	107	1000.8	4.8
2019	12	18	2	50	41	10.3	12.9	2.3	7.14	5.41	96	1001.2	4.8
2019	12	18	3	50	33	9.4	11.6	2.48	7.14	5.58	92	1001.9	4.6
2019	12	18	4	50	26	10.7	12.6	2.17	6.67	5.28	95	1001.4	4.1
2019	12	18	5	50	26	10.4	13.5	2.17	7.14	5.25	98	1001.9	3.9
2019	12	18	6	50	21	12.8	15.4	2.5	7.14	5.58	83	1001.3	3.3
2019	12	18	7	50	19	10.1	12.2	2.61	6.67	5.67	85	1003.2	3.4
2019	12	18	8	50	8	10.5	12	2.75	7.69	6	94	1002.5	3.1
2019	12	18	9	50	357	9.5	11.6	2.61	7.69	5.86	94	1003	3
2019	12	18	10	50	339	9.2	11.1	2.72	7.14	6.2	57	1004.2	2.7
2019	12	18	11	50	328	11.7	14.3	2.73	7.69	6.12	71	1004.9	1.4
2019	12	18	12	50	316	9.8	12	2.6	7.69	5.92	81	1005.7	1.6
2019	12	18	13	50	315	10.4	11.9	2.49	7.69	5.85	86	1006.2	1.1
2019	12	18	14	50	305	9.2	11.2	2.33	8.33	5.9	89	1006.7	0.7
2019	12	18	15	50	303	8.6	10.6	2.29	7.69	5.85	85	1006.3	0.5
2019	12	18	16	50	304	8.3	10.1	1.91	7.69	5.65	73	1005.6	0.5
2019	12	18	17	50	309	7	9.2	1.7	7.69	5.48	58	1005.3	0.8
2019	12	18	18	50	297	5.8	8.2	1.62	7.69	5.51	72	1005.2	1.4
2019	12	18	19	50	281	6.8	9	1.65	7.69	5.7	67	1005.4	1.8
2019	12	18	20	50	263	8.7	10.7	1.54	8.33	5.17	84	1005.5	2
2019	12	18	21	50	249	7.8	9.7	1.46	7.69	5.01	80	1005.8	2
2019	12	18	22	50	257	9.4	12.1	1.57	7.69	5.2	77	1005.9	2
2019	12	18	23	50	257	9.2	11.4	1.55	8.33	4.91	83	1006.2	1.8
2019	12	19	0	50	293	13.1	16.6	1.55	8.33	4.6	85	1006.2	0.7
2019	12	19	1	50	277	13.6	16.2	1.77	4.17	4.26	284	1006.1	0.9
2019	12	19	2	50	285	16.3	20.1	2.08	5.26	4.69	287	1006.1	-0.3
2019	12	19	3	50	289	17.3	20.5	2.4	5.88	5.12	296	1006.9	-1.4
2019	12	19	4	50	289	17	21.6	2.61	6.67	5.42	299	1007.2	-2.5
2019	12	19	5	50	281	15.6	20.1	2.76	7.14	5.68	301	1007.6	-3.4
2019	12	19	6	50	283	14.7	18.4	2.63	7.14	5.76	295	1008.5	-4.1
2019	12	19	7	50	275	15.8	18.9	2.93	7.14	5.75	300	1009	-5.2
2019	12	19	8	50	285	14.8	19.8	2.86	6.67	5.65	308	1009.8	-5.5
2019	12	19	9	50	290	16.1	19	2.79	6.67	5.34	297	1010.9	-6.4
2019	12	19	10	50	293	15.9	19.5	3.02	6.67	5.51	301	1012.6	-6.7
2019	12	19	11	50	292	15.1	18.7	3.21	6.67	5.57	302	1014.4	-6.6
2019	12	19	12	50	293	15.1	19.1	2.63	6.25	5.11	307	1015.9	-6.9
2019	12	19	13	50	296	14.9	18.8	2.63	6.25	5.11	304	1017.1	-7.1
2019	12	19	14	50	296	14.4	17.8	2.42	5.88	4.94	306	1017.8	-7
2019	12	19	15	50	286	14.1	17.6	2.27	6.25	5.05	302	1018	-6.7
2019	12	19	16	50	292	13.8	17.2	2.42	6.67	5.19	316	1018	-5.9
2019	12	19	17	50	279	13.1	16.9	2.22	5.88	5.02	306	1018	-5.6
2019	12	19	18	50	275	12.8	15.2	2.16	6.25	5.11	313	1018.5	-4.8
2019	12	19	19	50	284	14.3	18.3	1.99	5.88	5.02	303	1019.3	-3.5
2019	12	19	20	50	285	12.9	17.1	2.16	5.88	4.98	297	1019.9	-3.5
2019	12	19	21	50	287	13.8	17.5	2.35	5.88	5.08	299	1020.6	-3.4
2019	12	19	22	50	288	14.5	17.8	2.26	5.88	4.89	297	1021.3	-3.8
2019	12	19	23	50	290	14.5	17.9	2.45	5.88	4.97	303	1021.8	-3.9
2019	12	20	0	50	289	14.8	17.9	2.37	5.56	4.84	299	1022.2	-4.2
2019	12	20	1	50	288	14.3	17.7	2.21	5.88	4.71	306	1022.7	-4.2
2019	12	20	2	50	280	14.2	18.5	1.86	5.56	4.55	308	1022.9	-4.4
2019	12	20	3	50	284	14.7	17.3	1.94	5.56	4.54	311	1022.5	-4.4
2019	12	20	4	50	288	14.1	17.6	1.94	5.88	4.65	311	1022.6	-4.4
2019	12	20	5	50	286	15	18.3	2.16	5.56	4.85	312	1022.2	-4.5
2019	12	20	6	50	290	13.9	17.2	1.99	6.25	4.99	300	1022.8	-4.7
2019	12	20	7	50	298	13.1	16.2	2.47	5.88	5.24	311	1023.7	-4.8
2019	12	20	8	50	298	13.4	17	2.32	6.25	5.16	308	1024.1	-5.3
2019	12	20	9	50	308	13.1	16.4	2.31	5.88	5.19	303	1024.5	-5.6
2019	12	20	10	50	316	10.7	13.5	2.37	6.25	5.21	326	1025.8	-6.5
2019	12	20	11	50	314	10.6	13.9	1.92	5.56	4.77	304	1026.4	-6.1
2019	12	20	12	50	309	10	12.7	1.68	5.88	4.35	309	1027.5	-6
2019	12	20	13	50	317	10.3	13.3	1.52	5	4.2	321	1028.4	-5.6
2019	12	20	14	50	323	9.8	12.2	1.12	5	3.94	322	1029.4	-5.3
2019	12	20	15	50	322	9	11.3	1.19	5.26	3.99	331	1029.5	-4.7
2019	12	20	16	50	331	8.5	10.7	1.05	5.26	3.93	327	1029.6	-4.2
2019	12	20	17	50	329	8.1	10	0.94	5.26	3.87	351	1029.6	-3.6
2019	12	20	18	50	316	8.4	10.9	0.95	5.26	4.01	4	1030	-2.9
2019	12	20	19	50	313	7.8	9.5	1.07	5.56	4.22	22	1030.8	-1.9
2019	12	20	20	50	319	7.5	9	0.99	5.56	4.13	22	1031.4	-1.3
2019	12	20	21	50	313	7.3	9.2	1.06	4.76	4.04	2	1032.1	-0.9
2019	12	20	22	50	316	7.3	10.6	1.09	5.26	4.07	22	1032.7	-0.4
2019	12	20	23	50	320	7.8	9.8	1.12	4.76	4.14	10	1033.3	0
2019	12	21	0	50	327	8.2	9.9	1.06	5.88	4.13	43	1033.5	0.1
2019	12	21	1	50	327	8	10.5	1.11	5.56	4.04	35	1034.2	0.2
2019	12	21	2	50	339	8.5	10.2	1.11	5.56	4.09	35	1034.4	0.8
2019	12	21	3	50	357	8.4	10.3	1.21	5.26	4.06	27	1034.7	1.1
2019	12	21	4	50	13	7.6	9.1	1.2	5.56	4.26	11	1034.7	0.8
2019	12	21	5	50	6	7.1	8.8	1.07	5.56	4.12	9	1035.2	0.5
2019	12	21	6	50	16	6.5	8.7	1.26	5.56	4.39	2	1035.8	0.4
2019	12	21	7	50	12	5.8	7.7	1.12	5.56	4.45	19	1036.1	0.4
2019	12	21	8	50	8	4.5	6.6	1.11	6.25	4.71	36	1036.1	0.2
2019	12	21	9	50	360	4.8	6.3	1.01	5.88	4.51	33	1036	0.3
2019	12	21	10	50	12	4.4	6	0.98	6.67	4.5	47	1036	0.5
2019	12	21	11	50	21	3.2	5.2	0.97	6.25	4.54	51	1036.3	0.5
2019	12	21	12	50	24	2.8	4.5	0.98	6.25	4.64	51	1036.6	0.7
2019	12	21	13	50	354	2.8	4.7	1	6.67	4.85	57	1036.8	1
2019	12	21	14	50	23	1.8	3.5	0.98	7.14	4.91	66	1037.4	1
2019	12	21	15	50	33	0.7	2.9	0.94	6.25	4.76	62	1036.5	1.3
2019	12	21	16	50	60	1.8	2.9	0.95	6.25	4.82	61	1035.7	1.4
2019	12	21	17	50	235	1.3	2.8	0.78	5.88	4.66	37	1035	1.5
2019	12	21	18	50	236	0.7	2	0.7	5.88	4.72	29	1034.4	1.6
2019	12	21	19	50	183	2.3	3.3	0.64	5.88	4.62	26	1033.9	1.5
2019	12	21	20	50	191	2.9	4.8	0.61	5.56	4.64	26	1033.7	1.7
2019	12	21	21	50	209	3.1	3.9	0.63	5.88	4.77	30	1033.4	1.6
2019	12	21	22	50	198	3.7	5	0.56	5.26	4.54	29	1033.2	1.9
2019	12	21	23	50	208	4.1	5.3	0.56	5.56	4.5	43	1032.9	2
2019	12	22	0	46	181	4.4	5.3	0.54	5.56	4.29	39	1032.2	1.7
2019	12	22	1	50	186	4.1	5.2	0.57	5.56	4.08	49	1032.2	1.8
2019	12	22	2	50	178	5.1	6.4	0.53	5.56	4.01	46	1031.8	2.1
2019	12	22	3	50	168	6.5	7.6	0.55	5.56	3.59	53	1030.9	2.2
2019	12	22	4	50	176	8.2	9.9	0.64	3.03	3.58	173	1030	2.5
2019	12	22	5	50	176	8.5	10	0.73	3.33	3.64	157	1029.1	3
2019	12	22	6	50	187	7.8	9.1	0.7	3.33	3.59	172	1029.4	3.3
2019	12	22	7	50	200	8.2	9.9	0.69	3.57	3.69	153	1028.8	4
2019	12	22	8	50	228	6.4	7.4	0.69	4	3.73	191	1028.2	3.7
2019	12	22	9	50	236	7.1	8.5	0.62	3.7	3.77	194	1027.9	3.2
2019	12	22	10	50	231	6.9	8.6	0.67	4	3.75	203	1027.4	3.1
2019	12	22	11	50	230	8.2	9.6	0.71	3.7	3.56	232	1026.6	2.9
2019	12	22	12	50	225	7.9	9.2	0.72	3.7	3.61	245	1026.4	2.5
2019	12	22	13	50	225	7.6	9	0.73	3.57	3.49	225	1026.6	2.8
2019	12	22	14	50	228	9.2	10.4	0.8	3.33	3.36	239	1026	3.1
2019	12	22	15	50	215	10.2	11.9	0.86	3.45	3.4	234	1023.9	3.9
2019	12	22	16	50	214	9.5	11.3	0.83	3.45	3.44	231	1023.1	4.3
2019	12	22	17	50	218	9.1	10.6	0.86	3.85	3.56	231	1022.1	4.7
2019	12	22	18	50	210	8.3	9.6	0.91	3.85	3.77	213	1021.4	5.1
2019	12	22	19	50	209	7.5	8.7	0.73	4	3.71	215	1021.2	5.1
2019	12	22	20	50	211	7.7	9.1	0.64	4.35	3.8	205	1020.5	5.5
2019	12	22	21	50	217	6.7	8.1	0.68	3.57	3.74	207	1020	6.1
2019	12	22	22	50	222	8.1	9.9	0.77	3.85	3.83	213	1019.1	5.7
2019	12	22	23	50	231	8.5	10.3	0.87	4.35	4.02	224	1018.6	5.6
2019	12	23	0	46	235	8.3	10	0.8	4.35	3.85	229	1018.7	5.6
2019	12	23	1	50	239	9.4	11	0.81	4	3.59	228	1018.8	5.4
2019	12	23	2	50	234	8.3	9.6	0.91	4	3.61	230	1019.1	5.6
2019	12	23	3	50	248	8.9	10.3	0.89	3.45	3.51	252	1018.8	5.3
2019	12	23	4	50	251	9.1	10.5	0.82	3.7	3.52	247	1018.4	5.2
2019	12	23	5	50	246	8.9	10.5	0.78	3.85	3.38	239	1018	5
2019	12	23	6	50	248	8.3	9.4	0.81	3.57	3.53	255	1018.1	5
2019	12	23	7	50	256	7.8	9.1	0.78	4	3.63	243	1017.7	5.1
2019	12	23	8	50	252	6.3	7.1	0.71	4	3.83	248	1018	4.9
2019	12	23	9	50	256	6	7.2	0.71	4	3.93	269	1017.5	4.9
2019	12	23	10	50	241	6.5	7.7	0.64	4	3.98	258	1017.3	4.9
2019	12	23	11	50	247	7.6	9	0.67	4.17	3.92	243	1017.6	4.9
2019	12	23	12	50	267	6.9	8.5	0.85	4.17	3.93	242	1017.8	5.4
2019	12	23	13	50	262	6.8	7.8	0.83	4	3.75	261	1018.1	5.9
2019	12	23	14	50	255	5.7	6.6	0.79	3.57	3.73	265	1018	6
2019	12	23	15	50	251	5.1	6.1 9	9	99.00 9	9	999	1016.7	5.9
2019	12	23	16	50	231	5.1	5.9	0.6	3.23	3.47	266	1015.6	6.5
2019	12	23	17	50	231	6.2	7.1	0.61	3.45	3.34	267	1014.2	7.5
2019	12	23	18	50	215	5.1	6.0 9	9	99.00 9	9	999	1013.3	8.1
2019	12	23	19	50	201	7.7	9.3	0.5	2.86	3.58	238	1012	8.4
2019	12	23	20	50	204	10	11.7	0.55	3.03	3.39	232	1011.7	7.6
2019	12	23	21	50	202	10.3	12.1	0.74	4	3.84	210	1010.8	6.8
2019	12	23	22	50	209	10.5	12.4	0.75	4.17	3.9	212	1010.6	6.8
2019	12	23	23	50	214	9.5	11.3	0.94	5	4.33	221	1010.1	7.3
2019	12	24	0	46	221	9.5	11.9	0.93	5	4.2	217	1008.9	7.5
2019	12	24	1	50	225	7.2	8.4	0.85	4	4.01	220	1008.3	8
2019	12	24	2	50	242	9.2	11.3	0.78	4.35	3.7	227	1008.1	7.8
2019	12	24	3	50	244	7.9	9	0.85	4.17	3.75	222	1008.8	7.8
2019	12	24	4	50	241	7	7.9	0.7	13.79	3.62	65	1008.7	7.8
2019	12	24	5	50	264	5.8	7	0.62	3.7	3.59	269	1009.7	7.6
2019	12	24	6	50	332	6.7	8.9	0.56	14.81	3.6	67	1011	7.8
2019	12	24	7	50	318	10.3	12.9	0.72	3.03	3.14	319	1011.8	7.3
2019	12	24	8	50	319	11.8	14.3	0.94	3.45	3.48	331	1012.5	6.7
2019	12	24	9	50	307	9.3	11.2	1.23	4.55	3.96	334	1013.2	6.2
2019	12	24	10	50	313	9.7	11.8	1.22	5.26	4.18	347	1014.2	5.8
2019	12	24	11	50	317	10.1	13	1.3	5	4.2	341	1015	5.1
2019	12	24	12	50	314	9.7	11.4	1.37	5.56	4.44	344	1016	4.6
2019	12	24	13	50	317	10.2	12.1	1.4	5.56	4.49	350	1016.7	4.2
2019	12	24	14	50	329	11	13	1.57	5.56	4.55	350	1018.1	4
2019	12	24	15	50	337	9.4	11.9	1.84	5.56	4.8	355	1017.8	4
2019	12	24	16	50	327	8.6	10.2	1.57	6.25	4.51	28	1017.5	3.9
2019	12	24	17	50	327	8.8	10.2	1.38	5.88	4.42	26	1017.3	4.1
2019	12	24	18	50	322	8.8	10.3	1.24	5.56	4.12	17	1017.7	4.7
2019	12	24	19	50	333	8.2	9.7	1.02	4.76	3.99	357	1018.3	5.2
2019	12	24	20	50	333	8	9.2	1.04	4.76	3.93	6	1018.8	5.3
2019	12	24	21	50	326	7.8	9.3	0.91	5.26	3.92	25	1019.7	5.2
2019	12	24	22	50	328	6.9	8.1	0.84	5.26	3.89	23	1019.8	5.6
2019	12	24	23	50	329	6.2	7.4	0.86	4.76	4.05	357	1020.6	5.6
2019	12	25	0	46	325	6.8	7.6	0.78	4.76	4.02	1	1021	5.5
2019	12	25	1	50	355	6.5	7.9	0.85	4.55	3.9	352	1021.2	5.6
2019	12	25	2	50	6	7.2	8.4	0.92	4.76	3.99	1	1021.4	5.3
2019	12	25	3	50	9	7.3	8.6	0.97	5.26	4.03	29	1022.2	4.9
2019	12	25	4	50	25	6.3	7.2	1.1	5.26	4.25	37	1022	4.4
2019	12	25	5	50	29	5.8	7.1	0.98	5.26	4.21	27	1022.2	4.3
2019	12	25	6	50	30	7.5	8.9	0.99	5.26	4.23	30	1022.3	3.6
2019	12	25	7	50	26	7.2	8.7	0.97	5	3.95	28	1022.4	3.3
2019	12	25	8	50	31	7.3	8.9	1.07	4.76	4.16	20	1022	3
2019	12	25	9	50	37	6.7	8.3	1.08	5.56	4.31	32	1022.3	2.8
2019	12	25	10	50	42	5.8	7	1.08	5.88	4.41	33	1022.5	2.9
2019	12	25	11	50	53	4.8	6.3	0.86	5.88	4.24	30	1022.6	2.9
2019	12	25	12	50	58	4.7	5.6	0.8	5.88	4.21	39	1023.1	3
2019	12	25	13	50	60	2.9	4.8	0.74	5.56	4.29	40	1024	3
2019	12	25	14	50	79	2.4	3.5	0.81	5.88	4.46	45	1024	3.1
2019	12	25	15	50	138	1.1	1.8	0.78	5.56	4.71	54	1023.4	3.4
2019	12	25	16	50	194	1.8	2.7	0.81	6.25	4.75	61	1022.8	3.8
2019	12	25	17	50	237	2.2	3.6	0.86	6.25	4.95	56	1022.3	3.6
2019	12	25	18	50	244	1.7	2.8	0.82	5.56	5.06	53	1022.1	4.3
2019	12	25	19	50	238	0.2	0.7	0.87	5.88	5.21	56	1022.3	4.6
2019	12	25	20	50	128	0.8	1.3	0.82	6.25	4.9	62	1022.6	3.6
2019	12	25	21	50	134	2.8	3.4	0.84	6.25	4.99	60	1022	3.9
2019	12	25	22	50	148	3.7	4.5	0.71	6.25	4.71	47	1022.4	4
2019	12	25	23	50	171	3.3	4.1	0.68	6.67	4.65	38	1022.6	4
2019	12	26	0	46	206	2.5	3.3	0.62	6.25	4.63	36	1022.9	3.8
2019	12	26	1	50	229	0.8	1.4	0.59	6.25	4.72	52	1023.1	4
2019	12	26	2	50	260	1.7	2.4	0.55	5.88	4.79	46	1023.1	4.2
2019	12	26	3	50	243	2	3	0.55	6.25	4.99	55	1022.8	4.2
2019	12	26	4	50	264	2.4	3	0.52	5.56	5	52	1022.6	4.2
2019	12	26	5	50	272	2	2.7	0.56	5.88	4.96	61	1022.6	4.3
2019	12	26	6	50	303	2.7	3.6	0.53	5.88	5.15	57	1023.5	4.4
2019	12	26	7	50	323	2.4	3.5	0.54	5.56	5.08	71	1024.1	4.8
2019	12	26	8	50	359	3.9	5.5	0.52	5.26	4.95	81	1024.5	4.8
2019	12	26	9	50	20	4.6	5.9	0.45	5.26	4.65	80	1024.9	4.7
2019	12	26	10	50	25	4.4	5.2	0.46	4.76	3.88	81	1025.7	4.6
2019	12	26	11	50	29	4.6	5.8	0.47	5.26	3.57	84	1026.4	4.6
2019	12	26	12	50	39	5.7	7.1	0.47	5	3.76	64	1027.1	4.7
2019	12	26	13	50	53	5.8	7.2	0.49	3.03	3.5	24	1027.6	4.6
2019	12	26	14	50	52	6.4	7.7	0.52	2.94	3.49	37	1028.3	4
2019	12	26	15	50	43	6.8	8.6	0.65	3.85	3.44	57	1028.6	3.2
2019	12	26	16	50	36	7.2	8.8	0.77	4.55	3.82	51	1028.3	2.7
2019	12	26	17	50	44	6.9	8.6	0.89	4.76	4.15	60	1028.4	2.4
2019	12	26	18	50	37	5.9	7.8	1.01	4.76	4.39	57	1029.2	1.6
2019	12	26	19	50	36	4.9	6.4	1.11	5.26	4.68	57	1029.9	1.6
2019	12	26	20	50	42	5.1	6.7	1.2	5.56	4.66	54	1030.6	1.2
2019	12	26	21	50	48	5.1	6.7	1.17	5.56	4.72	55	1030.7	1
2019	12	26	22	50	58	4.2	5.7	1.16	5.88	4.77	49	1031	1.1
2019	12	26	23	50	81	3.2	4.1	1.17	6.25	4.95	44	1031.5	1.2
2019	12	27	0	50	92	3.8	5.6	1.07	6.67	4.9	48	1031.3	1.4
2019	12	27	1	50	93	2.4	3.5	1	6.25	5.09	48	1031.3	1.5
2019	12	27	2	50	94	2.9	4.1	1.01	6.67	5.07	50	1031.2	1.7
2019	12	27	3	50	104	2.2	3.9	0.98	6.67	5.22	48	1030.9	1.9
2019	12	27	4	50	123	3.1	4.5	0.96	6.67	5.22	52	1030	2.1
2019	12	27	5	50	144	3.4	4.5	0.89	6.67	5.31	58	1029.8	2.3
2019	12	27	6	50	173	4.3	5.4	0.85	6.67	5.2	54	1029.6	2.4
2019	12	27	7	50	179	4.7	6	0.81	6.67	5.32	62	1029.1	2.5
2019	12	27	8	50	172	5.3	6.3	0.75	6.67	5.08	66	1028.6	2.7
2019	12	27	9	50	174	5.3	6.8	0.75	5.88	4.97	60	1028.2	2.9
2019	12	27	10	50	176	6.5	7.6	0.72	6.25	4.63	57	1027.3	3
2019	12	27	11	50	181	7.2	8.7	0.72	6.67	4.17	54	1027.1	3.6
2019	12	27	12	50	178	7.9	9.8	0.72	6.67	3.87	59	1026.3	3.7
2019	12	27	13	50	182	8.3	9.5	0.73	3.85	3.78	160	1026.2	4.2
2019	12	27	14	50	186	9.5	10.9	0.84	3.85	3.76	140	1025.4	4.6
2019	12	27	15	50	185	9.4	11.2	0.83	4	3.65	199	1023.8	5.1
2019	12	27	16	50	183	9	10.8	0.89	4.55	3.73	138	1022	5.5
2019	12	27	17	50	186	8.7	10.6	0.87	3.33	3.56	190	1020.3	5.9
2019	12	27	18	50	185	8.3	10.1	0.78	3.23	3.6	194	1018.9	6.3
2019	12	27	19	50	207	10.7	13.3	0.79	2.94	3.47	208	1018.1	7.4
2019	12	27	20	50	212	11.1	13.5	0.93	3.57	3.49	213	1017.2	7.5
2019	12	27	21	50	207	9.2	11	1.02	4.35	3.81	208	1017.2	7.1
2019	12	27	22	50	210	7.7	9	0.93	4.35	3.88	178	1017.1	7
2019	12	27	23	50	237	7.2	8.4	0.85	4.76	3.93	144	1017	7
2019	12	28	0	46	233	6.8	7.7	0.82	4.55	3.96	139	1016.9	7.2
2019	12	28	1	50	220	6.2	7.2	0.68	4.55	3.94	160	1016.7	7.2
2019	12	28	2	50	241	6.5	7.7	0.66	4.35	3.91	174	1016.3	7.2
2019	12	28	3	50	245	7.1	8.6	0.65	4.17	3.99	199	1015.9	7.1
2019	12	28	4	50	249	7.7	9	0.68	4	3.88	215	1015.5	7.3
2019	12	28	5	50	257	6.6	7.8	0.66	3.57	3.67	237	1015.4	7.4
2019	12	28	6	50	251	8	9.4	0.72	3.23	3.43	241	1016	7.3
2019	12	28	7	50	256	7.1	8	0.74	3.13	3.44	241	1016.2	7.1
2019	12	28	8	50	262	7	8	0.6	3.13	3.38	257	1016.6	7.2
2019	12	28	9	50	278	8.1	9.8	0.61	3.23	3.31	281	1016.8	7
2019	12	28	10	50	288	7.3	8.5	0.62	3.23	3.51	282	1017.5	6.7
2019	12	28	11	50	291	6.5	7.6	0.6	3.57	3.47	302	1018	6.3
2019	12	28	12	50	292	6	7.2	0.58	3.85	3.84	298	1019.1	6.1
2019	12	28	13	50	304	6.6	7.9	0.57	4	3.78	292	1020	6.4
2019	12	28	14	50	298	5.5	6.8	0.54	4	3.82	285	1020.3	6.3
2019	12	28	15	50	279	5.4	6.4	0.65	3.85	3.92	300	1019.8	6.1
2019	12	28	16	50	292	7.5	8.6	0.77	4.55	4	359	1019.1	6.2
2019	12	28	17	50	313	9.4	10.7	0.93	3.7	3.75	323	1018.5	6.5
2019	12	28	18	50	302	7.9	9.1	1.04	4.76	3.89	7	1018.9	6.9
2019	12	28	19	50	284	5.8	7	0.85	4.35	3.84	351	1019.4	6.8
2019	12	28	20	50	267	4.6	5.8	0.82	4.35	3.86	354	1019.5	6.5
2019	12	28	21	50	282	6.6	7.6	0.68	4.35	3.91	344	1019.8	6.5
2019	12	28	22	50	281	4.9	6	0.55	4.55	3.88	360	1020.9	6.5
2019	12	28	23	50	287	2.8	3.8	0.55	4	3.92	341	1020.9	6.7
2019	12	29	0	50	277	9.1	10.9	0.54	4.17	3.87	341	1020.2	6.2
2019	12	29	1	50	284	9.4	11	0.65	3.57	3.49	300	1020	6
2019	12	29	2	50	286	7.7	8.9	0.82	4.17	3.91	305	1019.7	5.7
2019	12	29	3	50	282	7.9	9.4	0.89	4.35	4.05	298	1019.2	5.4
2019	12	29	4	50	281	8.7	10.2	0.86	4.35	4	294	1018.6	5
2019	12	29	5	50	280	9.1	10.6	0.93	4	3.8	297	1018.6	4.4
2019	12	29	6	50	293	10.3	12.6	1.03	4.55	3.85	297	1018.9	4.6
2019	12	29	7	50	301	11.9	13.5	1.21	4.35	3.92	302	1019.1	4.4
2019	12	29	8	50	315	12	14.4	1.42	4.76	4.08	305	1020.4	4.3
2019	12	29	9	50	321	10.7	12.9	1.42	4.76	4.07	311	1021.1	4.1
2019	12	29	10	50	335	9.3	11.5	1.56	5.56	4.36	334	1021.5	3.9
2019	12	29	11	50	340	7.5	9	1.32	5	4.19	327	1022.5	3.9
2019	12	29	12	50	333	6.9	8.2	1.06	5	3.98	320	1023.3	4.2
2019	12	29	13	50	326	6.5	7.9	0.82	4.76	3.78	314	1023.6	4.1
2019	12	29	14	50	342	5.1	6.8	0.8	4.76	3.92	358	1023.8	4.2
2019	12	29	15	50	355	3.9	4.8	0.88	5	4.31	29	1023.5	4.5
2019	12	29	16	50	3	3.6	5.4	0.82	5.56	4.27	17	1022.4	4.5
2019	12	29	17	50	358	2.2	3.4	0.82	5.56	4.17	23	1022	4.5
2019	12	29	18	50	317	1.7	2.4	0.76	5.26	3.99	35	1021.5	4.5
2019	12	29	19	50	259	0.3	1.7	0.69	4.17	3.99	23	1021.7	4.9
2019	12	29	20	50	224	0.5	1.3	0.58	5.26	3.88	47	1021.8	4
2019	12	29	21	50	153	0.1	0.6	0.58	4.55	4.05	28	1021.6	3.9
2019	12	29	22	50	142	1.4	2.3	0.54	4.76	4.05	50	1021.7	4.1
2019	12	29	23	50	146	2.7	3.5	0.5	4.76	4.09	48	1021.3	4.2
2019	12	30	0	46	154	2.5	3.4	0.46	4.76	4.24	36	1021.4	4.3
2019	12	30	1	50	168	3.6	4.3	0.47	5.56	4.41	59	1021.4	4.4
2019	12	30	2	50	173	3.7	4.5	0.45	4.17	4.45	31	1021.2	4
2019	12	30	3	50	167	3.1	4.1	0.41	5.26	4.52	45	1020.7	3.5
2019	12	30	4	50	149	3	4.3	0.36	5	4.4	68	1019.6	3.3
2019	12	30	5	50	134	2.4	3	0.38	5.56	4.53	73	1019.3	3.3
2019	12	30	6	50	106	3.4	4.3	0.38	5	4.85	64	1018.8	3.4
2019	12	30	7	50	82	2.9	4.1	0.38	4.76	4.96	58	1019.4	3.3
2019	12	30	8	50	62	3.5	4.3	0.38	6.25	4.62	83	1018.8	3.2
2019	12	30	9	50	67	5.7	6.7	0.38	7.14	4.34	94	1018.7	2.7
2019	12	30	10	50	73	8.8	10.3	0.53	3.03	3.6	69	1018.1	3.3
2019	12	30	11	50	63	10	11.4	0.85	4.17	3.77	66	1017.8	3.2
2019	12	30	12	50	75	11.6	13.7	1.21	4.55	4.04	62	1017.5	3.2
2019	12	30	13	50	70	14.5	17	1.54	5	4.3	68	1016.4	2.7
2019	12	30	14	50	74	14.8	17.6	2.06	5.56	4.79	51	1017.2	2.6
2019	12	30	15	50	76	14.3	16.9	2.56	6.25	5.26	55	1015.8	2.5
2019	12	30	16	50	73	12.6	16.4	2.54	7.14	5.48	52	1015.7	2.8
2019	12	30	17	50	77	13.8	16.2	3.2	7.14	6.07	54	1015.2	2.1
2019	12	30	18	50	76	13.9	17	3.07	7.69	6.01	44	1014.9	2.5
2019	12	30	19	50	79	13.5	16	3.15	7.69	6.16	44	1014.4	2.6
2019	12	30	20	50	87	13.7	16.9	3.08	7.69	6.11	59	1013.4	3.2
2019	12	30	21	50	86	12.9	15.9	3.3	8.33	6.3	54	1013.9	3.2
2019	12	30	22	50	91	14.6	18	3.53	7.69	6.38	70	1013	3.1
2019	12	30	23	50	88	14.1	16.7	3.57	8.33	6.54	66	1012.9	3.7
2019	12	31	0	46	89	14.4	17.9	3.65	7.69	6.63	76	1011.7	3.4
2019	12	31	1	50	93	12.4	15.2	3.41	7.69	6.14	65	1013.1	4
2019	12	31	2	50	95	13	15.4	3.53	8.33	6.29	78	1012.1	4.1
2019	12	31	3	50	96	13.6	17.3	3.76	8.33	6.69	90	1010.8	4.2
2019	12	31	4	50	94	13.2	16.2	3.72	8.33	6.59	93	1009.2	4.6
2019	12	31	5	50	90	14.4	17.8	3.75	9.09	6.74	89	1007.3	4.8
2019	12	31	6	50	86	12.2	15.8	3.79	9.09	6.76	98	1007.1	5.1
2019	12	31	7	50	91	11.6	14.4	4.34	10	7.3	89	1006.4	5.4
2019	12	31	8	50	84	11.5	14.1	4.96	10	8.01	99	1004.9	5.6
2019	12	31	9	50	83	12.6	15.6	4.32	10	7.6	97	1003	5.8
2019	12	31	10	50	80	9.8	12	4.02	10	7.53	92	1002.8	6.3
2019	12	31	11	50	81	8.4	10.8	4.79	10	8.07	97	1001.7	6.8
2019	12	31	12	50	100	8.9	12.5	4.48	10	7.9	93	1000.1	7
2019	12	31	13	50	119	6.4	8.5	5.23	10	8.39	78	999.7	7.1
2019	12	31	14	50	185	3	4.5	4.64	10	8.14	97	999.6	7
2019	12	31	15	50	291	4.7	6.7	4.04	10	7.77	95	998.9	7.1
2019	12	31	16	50	304	7.7	9.7	3.64	10	7.78	100	998.4	6.6
2019	12	31	17	50	315	12	14.6	3.53	10	7.36	101	997.9	4.3
2019	12	31	18	50	309	9.8	12.8	3.34	10	6.86	104	998.8	3.6
2019	12	31	19	50	307	9.3	11.4	3.17	10	6.59	106	999.1	3.5
2019	12	31	20	50	309	9.2	11.7	3.49	10	7.17	104	999.8	3.3
2019	12	31	21	50	321	7.5	9.2	3.48	10.81	7.2	84	999.6	3.2
2019	12	31	22	50	292	7.2	9.6	3.27	9.09	7.27	103	1000	3.3
