# Supplementary material for: Developing bottom drifters to better understand the stranding locations of cold-stunned sea turtles in Cape Cod Bay, Massachusetts
Source: PeerJ. 2023 Aug 30;11:e15866. doi: 10.7717/peerj.15866 (PMC10474834; doi:10.7717/peerj.15866)
Supplement: Supplemental Information 23 — This buoy is located west of the drifter deployment site in Cape Cod Bay, Massachusetts. The data was used to estimate wind speed around the time of the drifter deployments. [file peerj-11-15866-s023.xlsx]

## Sheet: 2019_Station44090
#YY	MM	DD	hh	mm	WVHT	DPD	APD	MWD	WTMP
#yr	mo	dy	hr	mn	m	sec	sec	degT	degC
2019	10	31	0	0	0.24 9	9	2.46	999	13.9
2019	10	31	0	30	0.28	2.5	2.53	107	13.9
2019	10	31	1	0	0.33	2.7	2.63	108	13.8
2019	10	31	1	30	0.34	2.86	2.7	107	13.9
2019	10	31	2	0	0.31	2.56	2.58	117	13.8
2019	10	31	2	30	0.33	2.63	2.53	113	13.8
2019	10	31	3	0	0.36	2.63	2.57	120	13.8
2019	10	31	3	30	0.35	2.7	2.6	129	13.8
2019	10	31	4	0	0.37	2.78	2.58	132	13.8
2019	10	31	4	30	0.39	2.78	2.59	145	13.8
2019	10	31	5	0	0.38	2.7	2.62	152	13.7
2019	10	31	5	30	0.42	2.7	2.64	173	13.7
2019	10	31	6	0	0.35	2.63	2.58	172	13.8
2019	10	31	6	30	0.34	2.44	2.44	197	13.8
2019	10	31	7	0	0.33	2.5	2.49	212	13.7
2019	10	31	7	30	0.29	2.44	2.48	221	13.8
2019	10	31	8	0	0.29	2.44	2.49	232	13.7
2019	10	31	8	30	0.29	2.17	2.41	198	13.7
2019	10	31	9	0	0.31	2.17	2.37	201	13.7
2019	10	31	9	30	0.32	2.22	2.34	204	13.7
2019	10	31	10	30	0.229	9	2.36	999	13.7
2019	10	31	11	0	9.00 9	9.00 9	9	999	13.7
2019	10	31	11	30	9.00 9	9.00 9	9	999	13.7
2019	10	31	12	0	0.39	2.7	2.5	172	13.7
2019	10	31	12	30	0.58	3.03	2.84	180	13.7
2019	10	31	13	0	0.65	3.33	2.96	181	13.7
2019	10	31	13	30	0.83	3.57	3.21	180	13.7
2019	10	31	14	0	0.79	3.57	3.26	180	13.7
2019	10	31	14	30	0.83	3.7	3.31	184	13.7
2019	10	31	15	0	0.79	3.57	3.2	184	13.7
2019	10	31	15	30	0.72	3.57	3.17	181	13.7
2019	10	31	16	0	0.71	3.23	3.07	193	13.7
2019	10	31	16	30	0.69	3.45	3.06	193	13.7
2019	10	31	17	0	0.68	3.57	3.02	196	13.7
2019	10	31	17	30	0.72	3.33	3.09	196	13.7
2019	10	31	18	0	0.65	3.45	2.98	193	13.7
2019	10	31	18	30	0.61	3.33	2.91	187	13.7
2019	10	31	19	0	0.68	3.23	2.88	193	13.7
2019	10	31	19	30	0.7	3.23	2.92	190	13.7
2019	10	31	20	0	0.69	3.33	2.96	193	13.7
2019	10	31	20	30	0.7	3.45	2.94	181	13.7
2019	10	31	21	0	0.69	3.23	2.89	190	13.7
2019	10	31	21	30	0.74	3.33	2.95	191	13.7
2019	10	31	22	0	0.78	3.33	3.04	190	13.7
2019	10	31	22	30	0.79	3.57	3.03	186	13.7
2019	10	31	23	0	0.85	3.57	3.09	187	13.7
2019	10	31	23	30	0.83	3.45	3.12	183	13.7
2019	11	1	0	30	0.87	3.45	3.22	189	13.7
2019	11	1	1	0	0.93	3.7	3.28	183	13.6
2019	11	1	1	30	0.88	3.7	3.3	179	13.7
2019	11	1	2	0	0.96	4	3.42	181	13.6
2019	11	1	2	30	1.02	4	3.55	189	13.6
2019	11	1	3	0	1.08	4.17	3.65	181	13.6
2019	11	1	4	0	1.15	4.17	3.77	187	13.6
2019	11	1	4	30	1.24	4.55	3.92	176	13.6
2019	11	1	5	0	1.13	4.17	3.7	187	13.6
2019	11	1	5	30	0.96	4.17	3.49	180	13.6
2019	11	1	6	0	0.94	3.85	3.41	177	13.6
2019	11	1	6	30	1.11	4.35	3.69	183	13.5
2019	11	1	7	0	1.29	4.55	3.82	177	13.5
2019	11	1	8	0	1.47	4.55	3.99	183	13.5
2019	11	1	8	30	1.59	4.55	4.11	191	13.5
2019	11	1	9	0	1.43	4.55	3.97	190	13.5
2019	11	1	9	30	1.53	4.55	4	194	13.5
2019	11	1	10	0	1.3	4.35	3.73	211	13.5
2019	11	1	10	30	1.03	4.55	3.53	236	13.5
2019	11	1	11	0	0.92	4	3.38	249	13.5
2019	11	1	11	30	1.04	4	3.37	260	13.5
2019	11	1	12	0	1.23	4.35	3.81	262	13.5
2019	11	1	12	30	1.22	4.55	3.82	260	13.5
2019	11	1	13	0	1.14	4.35	3.71	260	13.4
2019	11	1	13	30	0.97	4.17	3.47	260	13.4
2019	11	1	14	0	0.96	4	3.37	262	13.4
2019	11	1	14	30	0.98	3.85	3.43	260	13.4
2019	11	1	15	0	0.92	4	3.38	267	13.4
2019	11	1	15	30	0.94	4	3.4	270	13.4
2019	11	1	16	0	0.96	3.57	3.43	271	13.4
2019	11	1	16	30	0.91	4	3.41	271	13.4
2019	11	1	17	0	0.95	3.85	3.49	287	13.5
2019	11	1	17	30	0.9	3.7	3.56	273	13.5
2019	11	1	18	0	0.9	3.57	3.56	281	13.5
2019	11	1	18	30	0.86	3.57	3.45	287	13.5
2019	11	1	19	0	0.8	3.33	3.4	270	13.5
2019	11	1	19	30	0.79	3.23	3.38	279	13.5
2019	11	1	20	0	0.76	3.57	3.39	301	13.5
2019	11	1	20	30	0.8	3.57	3.41	300	13.5
2019	11	1	21	0	0.82	3.23	3.45	279	13.4
2019	11	1	21	30	0.75	5	3.41	339	13.4
2019	11	1	22	0	0.71	4.35	3.41	331	13.4
2019	11	1	22	30	0.8	4.55	3.41	336	13.4
2019	11	1	23	0	0.91	4.55	3.65	333	13.4
2019	11	1	23	30	0.96	4.55	3.71	331	13.4
2019	11	2	0	0	0.97	5	3.8	340	13.4
2019	11	2	0	30	0.92	4.55	3.77	332	13.4
2019	11	2	1	0	0.94	4.76	3.71	339	13.4
2019	11	2	1	30	1.03	4.76	3.81	338	13.4
2019	11	2	2	0	1.14	4.76	3.85	342	13.4
2019	11	2	2	30	1.09	5	3.78	340	13.4
2019	11	2	3	0	1.09	4.76	3.77	338	13.4
2019	11	2	3	30	0.99	4.35	3.66	329	13.3
2019	11	2	4	0	1	4.35	3.64	335	13.3
2019	11	2	4	30	0.89	4.76	3.47	347	13.3
2019	11	2	5	0	0.87	4.55	3.43	342	13.3
2019	11	2	5	30	0.88	4.17	3.37	335	13.3
2019	11	2	6	30	0.86	4.17	3.39	338	13.3
2019	11	2	7	0	0.88	4.35	3.41	340	13.2
2019	11	2	7	30	0.84	4.35	3.48	339	13.2
2019	11	2	8	0	0.79	4.17	3.46	332	13.2
2019	11	2	8	30	0.79	3.85	3.47	332	13.2
2019	11	2	9	0	0.73	4.17	3.44	339	13.2
2019	11	2	9	30	0.79	4.35	3.57	345	13.2
2019	11	2	10	0	0.72	4.55	3.45	349	13.2
2019	11	2	10	30	0.74	3.85	3.52	339	13.2
2019	11	2	11	0	0.71	4.55	3.53	346	13.2
2019	11	2	11	30	0.69	4.76	3.68	353	13.2
2019	11	2	12	0	0.6	4.76	3.61	347	13.2
2019	11	2	12	30	0.59	4.55	3.6	346	13.2
2019	11	2	13	0	0.53	4.35	3.62	336	13.2
2019	11	2	13	30	0.54	4.17	3.65	336	13.2
2019	11	2	14	0	0.49	4.17	3.57	342	13.2
2019	11	2	14	30	0.48	4.35	3.47	346	13.2
2019	11	2	15	0	0.46	4.35	3.51	357	13.3
2019	11	2	15	30	0.46	4.17	3.45	354	13.4
2019	11	2	16	0	0.42	3.85	3.35	354	13.5
2019	11	2	16	30	0.4	3.85	3.39	356	13.5
2019	11	2	17	0	0.37	3.85	3.37	357	13.6
2019	11	2	17	30	0.36	3.85	3.38	356	13.7
2019	11	2	18	0	0.36	4	3.41	1	13.8
2019	11	2	18	30	0.31	3.7	3.33	357	13.9
2019	11	2	19	0	0.31	3.57	3.47	352	13.7
2019	11	2	19	30	0.31	4	3.57	3	13.5
2019	11	2	20	0	0.27	4	3.75	1	13.5
2019	11	2	20	30	0.28	3.85	3.16	354	13.4
2019	11	2	21	0	0.31	3.85	2.92	349	13.4
2019	11	2	21	30	0.32	5.26	2.87	9	13.3
2019	11	2	22	0	0.31	2.08	2.83	179	13.3
2019	11	2	22	30	0.29	5.26	2.9	1	13.3
2019	11	2	23	0	9.00 9	9.00 9	9	999	13.3
2019	11	2	23	30	0.26	5	2.99	359	13.2
2019	11	3	0	0	9.00 9	9.00 9	9	999	13.2
2019	11	3	0	30	0.21 9	9	3	999	13.2
2019	11	3	1	0	9.00 9	9.00 9	9	999	13.3
2019	11	3	1	30	0.15 9	9	4.07	999	13.2
2019	11	3	2	0	0.15 9	9	4.21	999	13.2
2019	11	3	2	30	9.00 9	9.00 9	9	999	13.2
2019	11	3	3	0	9.00 9	9.00 9	9	999	13.2
2019	11	3	3	30	0.22 9	9	2.44	999	13.2
2019	11	3	4	0	9.00 9	9.00 9	9	999	13.2
2019	11	3	4	30	9.00 9	9.00 9	9	999	13.2
2019	11	3	5	0	9.00 9	9.00 9	9	999	13.2
2019	11	3	5	30	0.26	2.17	2.32	273	13.2
2019	11	3	6	0	0.3	2.27	2.35	277	13.2
2019	11	3	6	30	0.36	2.44	2.39	280	13.2
2019	11	3	7	0	0.41	2.63	2.46	294	13.1
2019	11	3	7	30	0.41	2.7	2.51	297	13.1
2019	11	3	8	0	0.42	2.78	2.6	307	13.1
2019	11	3	8	30	0.42	2.94	2.66	324	13.1
2019	11	3	9	0	0.45	3.23	2.72	325	13.1
2019	11	3	9	30	0.44	3.03	2.7	325	13.1
2019	11	3	10	0	0.54	3.12	2.84	328	13.1
2019	11	3	10	30	0.54	3.7	2.96	333	13.1
2019	11	3	11	0	0.58	3.7	3.08	335	13.1
2019	11	3	11	30	0.57	3.57	3.1	336	13.1
2019	11	3	12	0	0.53	3.33	3.09	332	13.1
2019	11	3	12	30	0.5	3.85	3.06	345	13.1
2019	11	3	13	0	0.46	3.57	2.98	336	13.1
2019	11	3	13	30	0.45	3.45	2.88	333	13.1
2019	11	3	14	0	0.45	4	2.87	349	13.1
2019	11	3	14	30	0.45	2.7	2.77	316	13.1
2019	11	3	15	0	0.44	3.23	2.79	338	13.1
2019	11	3	15	30	0.44	3.33	2.76	338	13.1
2019	11	3	16	0	0.44	3.12	2.74	336	13.2
2019	11	3	16	30	0.39	3.23	2.74	340	13.2
2019	11	3	17	0	0.38	3.33	2.75	342	13.2
2019	11	3	17	30	0.38	3.33	2.75	339	13.2
2019	11	3	18	0	0.36	3.23	2.77	340	13.3
2019	11	3	18	30	0.32	3.23	2.66	346	13.2
2019	11	3	19	0	0.34	3.12	2.57	342	13.2
2019	11	3	19	30	0.38	2.5	2.49	287	13.2
2019	11	3	20	0	0.4	2.7	2.55	277	13.2
2019	11	3	20	30	0.44	2.63	2.6	284	13.1
2019	11	3	21	0	0.46	2.78	2.66	284	13.1
2019	11	3	21	30	0.53	2.86	2.72	293	13.1
2019	11	3	22	0	0.53	3.23	2.78	315	13.1
2019	11	3	22	30	0.52	3.33	2.86	316	13.1
2019	11	3	23	0	0.54	3.45	2.88	324	13.1
2019	11	3	23	30	0.51	3.57	2.91	332	13.1
2019	11	4	0	0	0.5	3.57	2.94	332	13.1
2019	11	4	0	30	0.52	3.57	2.93	336	13.1
2019	11	4	1	0	0.54	3.33	3.07	338	13.1
2019	11	4	1	30	0.57	3.45	3.06	336	13.1
2019	11	4	2	0	0.6	3.85	3.08	340	13.1
2019	11	4	2	30	0.54	4	2.99	342	13.1
2019	11	4	3	0	0.56	3.57	3.05	343	13.1
2019	11	4	3	30	0.62	3.7	3.15	345	13.1
2019	11	4	4	0	0.63	4	3.08	345	13.1
2019	11	4	4	30	0.62	3.85	3.04	343	13.1
2019	11	4	5	0	0.66	3.7	3.04	340	13
2019	11	4	5	30	0.75	3.7	3.19	343	13
2019	11	4	6	0	0.77	4	3.25	345	13
2019	11	4	6	30	0.8	4.17	3.35	345	13
2019	11	4	7	0	0.8	4	3.3	345	13
2019	11	4	7	30	0.77	4	3.34	349	13
2019	11	4	8	0	0.71	3.85	3.26	340	13
2019	11	4	8	30	0.71	4	3.25	342	13
2019	11	4	9	0	0.72	3.85	3.24	345	13
2019	11	4	9	30	0.7	4	3.33	342	13
2019	11	4	10	0	0.67	3.85	3.23	345	13
2019	11	4	10	30	0.66	4.35	3.29	347	13
2019	11	4	11	0	0.64	4.35	3.21	349	13
2019	11	4	11	30	0.64	3.57	3.22	339	13
2019	11	4	12	0	0.63	4.17	3.21	345	13
2019	11	4	12	30	0.61	4.17	3.21	343	13
2019	11	4	13	0	0.56	3.85	3.18	343	13
2019	11	4	13	30	0.54	4	3.14	345	13
2019	11	4	14	0	0.5	4.17	3.16	343	13
2019	11	4	14	30	0.43	3.7	3.09	345	13
2019	11	4	15	0	0.4	3.33	2.97	339	13
2019	11	4	15	30	0.37	4	2.93	349	13
2019	11	4	16	0	0.38	3.57	2.9	340	13
2019	11	4	16	30	0.35	4	2.91	0	13.1
2019	11	4	17	0	0.32	2.86	2.85	336	13.1
2019	11	4	17	30	0.32	3.57	2.97	354	13.2
2019	11	4	18	0	0.31	3.57	2.94	359	13.2
2019	11	4	18	30	0.25	2.94	2.89	350	13.3
2019	11	4	19	0	0.24 9	9	3	999	13.3
2019	11	4	19	30	0.23 9	9	3.01	999	13.2
2019	11	4	20	0	0.21 9	9	3.01	999	13.2
2019	11	4	20	30	0.21 9	9	2.72	999	13.1
2019	11	4	21	0	0.31	2.38	2.42	257	13.1
2019	11	4	21	30	0.37	2.5	2.49	243	13.1
2019	11	4	22	0	0.36	2.5	2.41	241	13
2019	11	4	22	30	0.35	2.7	2.38	241	13
2019	11	4	23	0	0.31	2.44	2.34	232	13
2019	11	4	23	30	0.29	2.33	2.27	224	13
2019	11	5	0	0	0.31	2.22	2.22	218	13
2019	11	5	0	30	0.31	2.38	2.26	217	13
2019	11	5	1	0	0.28	2.38	2.22	210	13
2019	11	5	1	30	0.25	2.27	2.17	214	12.9
2019	11	5	2	0	0.22 9	9	2.07	999	13
2019	11	5	2	30	9.00 9	9.00 9	9	999	13
2019	11	5	3	0	9.00 9	9.00 9	9	999	13
2019	11	5	3	30	0.25	2.04	2.05	169	13
2019	11	5	4	0	9.00 9	9.00 9	9	999	13
2019	11	5	4	30	0.29	2.13	2.12	160	12.9
2019	11	5	5	0	0.3	2.38	2.23	163	12.9
2019	11	5	5	30	0.37	2.56	2.38	166	12.9
2019	11	5	6	0	0.36	2.5	2.37	156	12.9
2019	11	5	6	30	0.35	2.5	2.39	146	12.9
2019	11	5	7	0	0.32	2.44	2.37	148	12.9
2019	11	5	7	30	0.33	2.56	2.39	131	12.9
2019	11	5	8	0	0.36	2.56	2.41	132	12.9
2019	11	5	8	30	0.4	2.7	2.49	127	12.9
2019	11	5	9	0	0.47	2.78	2.61	136	12.9
2019	11	5	9	30	0.5	2.94	2.67	138	12.9
2019	11	5	10	0	0.51	3.03	2.72	139	12.9
2019	11	5	10	30	0.59	3.12	2.79	136	12.9
2019	11	5	11	0	0.68	3.33	2.95	135	12.9
2019	11	5	11	30	0.7	3.45	2.96	134	12.9
2019	11	5	12	0	0.61	3.23	2.87	128	12.9
2019	11	5	12	30	0.53	3.03	2.73	134	12.9
2019	11	5	13	0	0.45	2.94	2.6	124	12.9
2019	11	5	13	30	0.34	3.03	2.47	101	12.9
2019	11	5	14	0	0.23 9	9	2.35	999	13
2019	11	5	14	30	0.15 9	9	2.32	999	13
2019	11	5	15	0	9.00 9	9.00 9	9	999	13
2019	11	5	15	30	9.00 9	9.00 9	9	999	13
2019	11	5	16	0	9.00 9	9.00 9	9	999	13
2019	11	5	16	30	9.00 9	9.00 9	9	999	13
2019	11	5	17	0	9.00 9	9.00 9	9	999	13.1
2019	11	5	17	30	9.00 9	9.00 9	9	999	13
2019	11	5	18	0	9.00 9	9.00 9	9	999	13
2019	11	5	18	30	0.19 9	9	2.13	999	13
2019	11	5	19	30	0.29	2.38	2.24	138	13
2019	11	5	20	0	0.41	2.56	2.5	146	13
2019	11	5	20	30	0.41	2.86	2.64	158	13
2019	11	5	21	0	0.46	2.94	2.6	166	13
2019	11	5	21	30	0.43	2.7	2.6	186	13
2019	11	5	22	0	0.45	2.7	2.5	198	13
2019	11	5	22	30	0.41	2.56	2.47	197	13
2019	11	5	23	0	0.44	2.78	2.47	221	13
2019	11	5	23	30	0.41	2.7	2.46	222	13
2019	11	6	0	0	0.32	2.7	2.37	224	13
2019	11	6	0	30	0.31	2.56	2.36	236	13
2019	11	6	1	0	0.27	2.56	2.31	243	13
2019	11	6	1	30	0.24 9	9	2.28	999	13
2019	11	6	2	0	0.21 9	9	2.2	999	13
2019	11	6	2	30	0.20 9	9	2.16	999	13
2019	11	6	3	0	9.00 9	9.00 9	9	999	13
2019	11	6	3	30	0.26	2.13	2.21	249	13
2019	11	6	4	0	0.27	2.22	2.23	243	12.9
2019	11	6	5	0	0.41	2.5	2.37	273	12.9
2019	11	6	5	30	0.57	3.03	2.74	302	12.9
2019	11	6	6	0	0.63	3.45	2.89	316	12.9
2019	11	6	6	30	0.66	3.45	2.94	314	12.9
2019	11	6	7	0	0.67	3.45	2.97	321	12.9
2019	11	6	7	30	0.72	3.57	3.1	325	12.9
2019	11	6	8	0	0.77	4	3.19	333	12.9
2019	11	6	8	30	0.82	4	3.29	335	12.9
2019	11	6	9	0	0.85	4.17	3.32	342	12.9
2019	11	6	9	30	0.87	4.17	3.47	339	12.9
2019	11	6	10	0	0.88	4.35	3.42	338	12.9
2019	11	6	11	0	0.85	4.55	3.51	338	12.9
2019	11	6	11	30	0.87	4.17	3.45	339	12.9
2019	11	6	12	0	0.9	4.35	3.49	340	12.9
2019	11	6	12	30	0.92	4.35	3.46	340	12.9
2019	11	6	13	0	0.83	4	3.44	335	12.9
2019	11	6	13	30	0.84	4.35	3.48	338	12.9
2019	11	6	14	0	0.75	4.35	3.38	342	12.9
2019	11	6	14	30	0.73	4.35	3.31	342	12.9
2019	11	6	15	0	0.78	4.17	3.27	338	12.9
2019	11	6	15	30	0.79	4.35	3.37	345	12.9
2019	11	6	16	0	0.75	4.35	3.4	345	12.9
2019	11	6	16	30	0.71	4.17	3.37	343	12.9
2019	11	6	17	0	0.72	4.17	3.38	346	12.9
2019	11	6	17	30	0.72	4	3.4	340	12.9
2019	11	6	18	0	0.68	4.17	3.3	340	12.9
2019	11	6	18	30	0.64	4.35	3.19	343	12.9
2019	11	6	19	0	0.62	4.17	3.1	342	12.9
2019	11	6	19	30	0.62	4.35	3.01	343	12.9
2019	11	6	20	0	0.58	3.7	2.95	335	12.9
2019	11	6	20	30	0.62	4	2.94	343	12.9
2019	11	6	21	0	0.56	3.7	2.92	338	12.9
2019	11	6	21	30	0.52	3.85	2.91	339	12.9
2019	11	6	22	0	0.45	3.85	2.87	340	12.9
2019	11	6	22	30	0.43	3.23	2.81	336	12.9
2019	11	6	23	0	0.37	3.7	2.77	342	12.9
2019	11	6	23	30	0.36	3.85	2.73	345	12.9
2019	11	7	0	0	0.33	3.57	2.61	342	12.9
2019	11	7	0	30	0.3	2.13	2.51	264	12.9
2019	11	7	1	0	0.32	2.22	2.41	264	12.9
2019	11	7	1	30	0.3	2.27	2.44	273	12.8
2019	11	7	2	0	0.29	2.33	2.43	262	12.9
2019	11	7	2	30	0.26	2.22	2.46	276	12.8
2019	11	7	3	0	0.24 9	9	2.54	999	12.8
2019	11	7	3	30	0.23 9	9	2.58	999	12.8
2019	11	7	4	0	0.25	3.45	2.57	346	12.8
2019	11	7	4	30	0.27	3.7	2.8	352	12.8
2019	11	7	5	0	0.26	3.45	2.79	349	12.8
2019	11	7	5	30	0.25	3.7	2.83	350	12.8
2019	11	7	6	0	0.23 9	9	2.83	999	12.8
2019	11	7	6	30	0.21 9	9	2.94	999	12.8
2019	11	7	7	0	0.19 9	9	2.7	999	12.8
2019	11	7	7	30	9.00 9	9.00 9	9	999	12.8
2019	11	7	8	0	9.00 9	9.00 9	9	999	12.8
2019	11	7	8	30	9.00 9	9.00 9	9	999	12.8
2019	11	7	9	0	9.00 9	9.00 9	9	999	12.8
2019	11	7	9	30	9.00 9	9.00 9	9	999	12.8
2019	11	7	10	0	0.18 9	9	2.2	999	12.8
2019	11	7	10	30	0.17 9	9	2.15	999	12.8
2019	11	7	11	0	0.18 9	9	2.12	999	12.8
2019	11	7	11	30	0.18 9	9	2.09	999	12.8
2019	11	7	12	0	9.00 9	9.00 9	9	999	12.7
2019	11	7	12	30	9.00 9	9.00 9	9	999	12.7
2019	11	7	13	0	0.27	2.04	2.14	190	12.7
2019	11	7	13	30	0.31	2.38	2.23	197	12.7
2019	11	7	14	0	0.3	2.44	2.25	207	12.8
2019	11	7	14	30	0.36	2.44	2.3	203	12.8
2019	11	7	15	0	0.46	2.63	2.47	198	12.8
2019	11	7	15	30	0.56	2.94	2.69	203	12.8
2019	11	7	16	0	0.61	3.12	2.75	198	12.8
2019	11	7	16	30	0.61	2.94	2.76	205	12.8
2019	11	7	17	0	0.66	3.45	2.86	224	12.8
2019	11	7	17	30	0.65	3.45	2.94	229	12.8
2019	11	7	18	0	0.61	3.23	2.87	229	12.8
2019	11	7	18	30	0.62	3.23	2.82	228	12.8
2019	11	7	19	0	0.69	3.33	2.93	232	12.8
2019	11	7	19	30	0.63	3.33	2.96	236	12.8
2019	11	7	20	30	0.51	3.33	2.77	250	12.8
2019	11	7	21	0	0.5	3.12	2.68	249	12.8
2019	11	7	21	30	0.45	2.94	2.59	242	12.8
2019	11	7	22	0	0.45	2.86	2.57	243	12.8
2019	11	7	22	30	0.36	2.7	2.48	242	12.7
2019	11	7	23	0	0.28	2.56	2.41	239	12.7
2019	11	7	23	30	0.23 9	9	2.29	999	12.7
2019	11	8	0	30	9.00 9	9.00 9	9	999	12.7
2019	11	8	1	0	9.00 9	9.00 9	9	999	12.7
2019	11	8	1	30	9.00 9	9.00 9	9	999	12.7
2019	11	8	2	0	0.31	2.13	2.17	316	12.7
2019	11	8	2	30	0.47	2.7	2.59	324	12.7
2019	11	8	3	0	0.59	3.33	2.93	326	12.7
2019	11	8	3	30	0.68	3.57	3.15	322	12.7
2019	11	8	4	0	0.7	3.85	3.26	332	12.7
2019	11	8	4	30	0.74	4.17	3.39	340	12.7
2019	11	8	5	0	0.76	4.17	3.4	339	12.7
2019	11	8	5	30	0.84	4.35	3.52	339	12.7
2019	11	8	6	0	0.98	4.55	3.67	338	12.7
2019	11	8	6	30	1.14	4.76	3.9	340	12.7
2019	11	8	7	0	1.18	4.76	3.96	345	12.7
2019	11	8	7	30	1.28	5.26	4.13	345	12.7
2019	11	8	8	0	1.4	5	4.23	346	12.7
2019	11	8	8	30	1.43	5.26	4.27	347	12.7
2019	11	8	9	0	1.47	5.26	4.29	347	12.7
2019	11	8	9	30	1.56	5.26	4.36	342	12.6
2019	11	8	10	0	1.73	5.56	4.49	345	12.6
2019	11	8	10	30	1.85	5.56	4.75	347	12.6
2019	11	8	11	0	1.87	5.56	4.82	340	12.6
2019	11	8	11	30	1.9	5.88	4.8	345	12.6
2019	11	8	12	0	2.06	6.25	5.01	350	12.5
2019	11	8	12	30	1.98	6.25	4.99	347	12.5
2019	11	8	13	0	1.87	6.25	4.96	350	12.5
2019	11	8	13	30	1.69	6.67	4.77	357	12.5
2019	11	8	14	0	1.7	6.25	4.85	352	12.5
2019	11	8	14	30	1.63	6.25	4.83	359	12.5
2019	11	8	15	0	1.67	6.25	4.85	356	12.5
2019	11	8	15	30	1.55	5.88	4.68	347	12.5
2019	11	8	16	0	1.46	6.67	4.47	6	12.5
2019	11	8	16	30	1.59	5.88	4.71	349	12.5
2019	11	8	17	0	1.5	5.56	4.58	343	12.5
2019	11	8	17	30	1.48	5.56	4.59	345	12.5
2019	11	8	18	0	1.46	6.25	4.61	357	12.5
2019	11	8	18	30	1.6	5.56	4.62	345	12.5
2019	11	8	19	0	1.65	5.88	4.72	349	12.5
2019	11	8	19	30	1.7	6.25	4.82	356	12.5
2019	11	8	20	0	1.71	6.25	4.75	352	12.5
2019	11	8	20	30	1.76	6.25	4.71	357	12.5
2019	11	8	21	0	1.8	5.88	4.76	347	12.5
2019	11	8	21	30	2.17	5.88	5.05	342	12.5
2019	11	8	22	0	2.19	6.67	5.12	350	12.4
2019	11	8	22	30	2.33	6.67	5.34	345	12.4
2019	11	8	23	0	2.23	6.67	5.22	352	12.4
2019	11	8	23	30	2.17	6.67	5.13	354	12.4
2019	11	9	0	0	2.07	6.25	5.01	346	12.3
2019	11	9	0	30	2.2	6.25	5.28	345	12.3
2019	11	9	1	0	2.09	6.25	5.15	345	12.3
2019	11	9	1	30	2.21	6.67	5.29	352	12.3
2019	11	9	2	0	2.09	7.14	5.24	1	12.3
2019	11	9	2	30	2.15	6.67	5.22	353	12.3
2019	11	9	3	0	2.13	6.67	5.27	353	12.3
2019	11	9	3	30	2.01	7.14	5.15	0	12.3
2019	11	9	4	0	1.9	6.25	5.27	350	12.3
2019	11	9	4	30	1.84	5.88	5.08	345	12.3
2019	11	9	5	0	1.78	6.67	5.08	357	12.3
2019	11	9	6	0	1.57	6.25	4.86	356	12.3
2019	11	9	6	30	1.63	7.14	4.98	9	12.2
2019	11	9	7	0	1.5	6.67	4.69	6	12.2
2019	11	9	7	30	1.35	6.67	4.56	7	12.2
2019	11	9	8	0	1.39	6.25	4.51	6	12.2
2019	11	9	8	30	1.22	5.56	4.14	359	12.2
2019	11	9	9	0	1.22	5.88	4.21	6	12.2
2019	11	9	9	30	1.2	5.88	4.15	7	12.2
2019	11	9	10	0	1.09	5.56	4	4	12.2
2019	11	9	10	30	1.02	5.56	3.96	4	12.2
2019	11	9	11	0	0.98	5.26	3.87	0	12.2
2019	11	9	11	30	0.92	5	3.79	354	12.1
2019	11	9	12	0	0.91	5.56	3.74	4	12.1
2019	11	9	12	30	0.87	5.26	3.77	3	12.1
2019	11	9	13	0	0.8	5.88	3.73	4	12.1
2019	11	9	13	30	0.76	5.26	3.7	1	12.1
2019	11	9	14	0	0.71	5.56	3.68	3	12.1
2019	11	9	14	30	0.63	5.56	3.67	1	12.1
2019	11	9	15	0	0.58	5	3.64	3	12.1
2019	11	9	15	30	0.51	5.26	3.53	0	12.1
2019	11	9	16	0	0.46	5	3.48	359	12.1
2019	11	9	16	30	0.43	5.56	3.61	4	12.2
2019	11	9	17	0	0.37	5.56	3.54	3	12.2
2019	11	9	17	30	0.33	5.56	3.55	6	12.2
2019	11	9	18	0	0.32	5.26	3.63	4	12.2
2019	11	9	18	30	0.31	5.56	3.02	0	12.2
2019	11	9	19	0	0.33	5	2.85	1	12.2
2019	11	9	19	30	0.33	2.17	2.64	236	12.2
2019	11	9	20	0	0.34	2.33	2.69	245	12.1
2019	11	9	20	30	0.35	2.33	2.52	238	12.1
2019	11	9	21	0	0.38	2.44	2.51	235	12.1
2019	11	9	21	30	0.38	2.5	2.59	241	12.1
2019	11	9	22	0	0.39	2.63	2.55	238	12.1
2019	11	9	22	30	0.39	2.63	2.51	236	12.1
2019	11	9	23	0	0.35	2.56	2.41	234	12.1
2019	11	9	23	30	0.31	2.44	2.32	224	12.1
2019	11	10	0	0	0.31	2.38	2.33	224	12.1
2019	11	10	0	30	0.29	2.44	2.3	218	12.1
2019	11	10	1	0	0.29	2.56	2.32	210	12.1
2019	11	10	1	30	0.33	2.56	2.34	205	12
2019	11	10	2	0	0.33	2.56	2.36	203	12
2019	11	10	2	30	0.32	2.27	2.3	200	12
2019	11	10	3	30	0.32	2.44	2.25	197	12
2019	11	10	4	0	0.33	2.38	2.22	205	12
2019	11	10	4	30	0.31	2.44	2.27	204	12
2019	11	10	5	0	0.28	2.44	2.23	193	12
2019	11	10	5	30	0.22 9	9	2.15	999	12
2019	11	10	6	0	9.00 9	9.00 9	9	999	12
2019	11	10	6	30	9.00 9	9.00 9	9	999	12
2019	11	10	7	0	9.00 9	9.00 9	9	999	12
2019	11	10	7	30	9.00 9	9.00 9	9	999	12
2019	11	10	8	0	9.00 9	9.00 9	9	999	12
2019	11	10	8	30	9.00 9	9.00 9	9	999	12
2019	11	10	9	0	9.00 9	9.00 9	9	999	12
2019	11	10	9	30	0.05 9	9	3.37	999	12
2019	11	10	10	0	0.06 9	9	3.33	999	12
2019	11	10	10	30	0.06 9	9	3.23	999	12
2019	11	10	11	0	0.06 9	9	3.16	999	12
2019	11	10	11	30	9.00 9	9.00 9	9	999	12
2019	11	10	12	0	9.00 9	9.00 9	9	999	11.9
2019	11	10	12	30	9.00 9	9.00 9	9	999	11.9
2019	11	10	13	0	0.28	2.27	2.15	267	11.9
2019	11	10	13	30	0.3	2.27	2.24	257	11.9
2019	11	10	14	0	0.31	2.38	2.28	263	11.9
2019	11	10	14	30	0.31	2.38	2.29	262	11.9
2019	11	10	15	0	0.31	2.56	2.32	264	11.9
2019	11	10	15	30	0.25	2.44	2.3	264	11.9
2019	11	10	16	0	0.23 9	9	2.24	999	11.9
2019	11	10	16	30	0.24 9	9	2.13	999	11.9
2019	11	10	17	0	0.34	2.27	2.26	243	11.9
2019	11	10	17	30	0.48	2.78	2.57	242	11.9
2019	11	10	18	0	0.54	3.03	2.71	241	11.9
2019	11	10	18	30	0.56	3.03	2.72	241	12
2019	11	10	19	0	0.54	3.12	2.74	236	12
2019	11	10	19	30	0.68	3.45	2.92	243	12
2019	11	10	20	0	0.77	3.45	3.06	246	12
2019	11	10	20	30	0.73	3.45	3.05	238	12
2019	11	10	21	0	0.6	3.33	2.9	248	11.9
2019	11	10	21	30	0.54	3.33	2.82	243	11.9
2019	11	10	22	0	0.53	3.23	2.76	249	12
2019	11	10	22	30	0.5	3.12	2.73	256	11.9
2019	11	10	23	0	0.51	3.23	2.74	252	11.9
2019	11	10	23	30	0.38	2.94	2.53	256	11.9
2019	11	11	0	0	0.31	2.7	2.43	255	11.8
2019	11	11	0	30	0.27	2.63	2.35	257	11.8
2019	11	11	1	0	0.32	2.5	2.3	253	11.9
2019	11	11	1	30	0.33	2.63	2.32	262	11.9
2019	11	11	2	0	0.36	2.5	2.36	260	11.9
2019	11	11	2	30	0.36	2.63	2.39	260	11.9
2019	11	11	3	0	0.37	2.56	2.4	270	11.9
2019	11	11	3	30	0.38	2.56	2.42	263	11.9
2019	11	11	4	0	0.41	2.7	2.48	264	11.9
2019	11	11	4	30	0.42	2.86	2.51	260	11.9
2019	11	11	5	0	0.44	2.86	2.55	262	11.9
2019	11	11	5	30	0.41	2.86	2.55	263	11.9
2019	11	11	6	0	0.37	2.63	2.47	266	11.9
2019	11	11	6	30	0.35	2.63	2.4	259	11.9
2019	11	11	7	0	0.37	2.78	2.48	264	11.9
2019	11	11	7	30	0.41	2.78	2.54	264	11.8
2019	11	11	8	0	0.36	2.78	2.51	263	11.8
2019	11	11	8	30	0.29	2.63	2.39	269	11.8
2019	11	11	9	0	0.25	2.5	2.32	271	11.8
2019	11	11	9	30	0.27	2.33	2.28	260	11.8
2019	11	11	10	0	0.29	2.27	2.27	255	11.8
2019	11	11	10	30	0.29	2.5	2.33	249	11.8
2019	11	11	11	0	0.26	2.5	2.32	248	11.8
2019	11	11	11	30	0.26	2.38	2.26	238	11.8
2019	11	11	12	0	0.20 9	9	2.23	999	11.8
2019	11	11	12	30	0.16 9	9	2.19	999	11.9
2019	11	11	13	0	9.00 9	9.00 9	9	999	11.9
2019	11	11	13	30	9.00 9	9.00 9	9	999	11.9
2019	11	11	14	0	9.00 9	9.00 9	9	999	11.9
2019	11	11	14	30	9.00 9	9.00 9	9	999	11.8
2019	11	11	15	0	9.00 9	9.00 9	9	999	11.9
2019	11	11	15	30	9.00 9	9.00 9	9	999	11.9
2019	11	11	16	0	0.24 9	9	2.12	999	11.9
2019	11	11	16	30	0.3	2.22	2.24	183	12
2019	11	11	17	0	0.34	2.38	2.31	179	12
2019	11	11	17	30	0.35	2.44	2.29	180	12
2019	11	11	18	0	0.33	2.27	2.31	184	11.9
2019	11	11	18	30	0.36	2.63	2.33	176	11.9
2019	11	11	19	0	0.33	2.33	2.32	172	11.9
2019	11	11	19	30	0.33	2.38	2.31	169	12
2019	11	11	20	0	0.31	2.38	2.27	167	12
2019	11	11	20	30	0.27	2.33	2.18	167	12
2019	11	11	21	0	0.26	2.27	2.21	156	12
2019	11	11	21	30	0.3	2.5	2.29	149	12
2019	11	11	22	0	0.36	2.5	2.39	153	12
2019	11	11	22	30	0.35	2.7	2.44	145	12
2019	11	11	23	0	0.33	2.7	2.44	144	11.9
2019	11	11	23	30	0.31	2.7	2.42	144	11.9
2019	11	12	0	0	0.27	2.7	2.43	139	11.9
2019	11	12	0	30	0.24 9	9	2.41	999	11.9
2019	11	12	1	0	0.22 9	9	2.41	999	11.9
2019	11	12	1	30	0.23 9	9	2.3	999	11.9
2019	11	12	2	0	0.23 9	9	2.35	999	11.9
2019	11	12	2	30	0.33	2.7	2.49	138	11.9
2019	11	12	3	0	0.34	2.7	2.5	145	11.9
2019	11	12	3	30	0.31	2.7	2.49	145	11.9
2019	11	12	4	0	0.28	2.63	2.44	144	11.9
2019	11	12	4	30	0.24 9	9	2.37	999	11.9
2019	11	12	5	0	0.20 9	9	2.43	999	11.9
2019	11	12	5	30	0.19 9	9	2.57	999	11.9
2019	11	12	6	0	0.18 9	9	2.88	999	11.9
2019	11	12	6	30	0.21 9	9	3.03	999	11.9
2019	11	12	7	0	0.23 9	9	3.65	999	11.9
2019	11	12	7	30	0.31	5.26	3.73	354	11.9
2019	11	12	8	0	0.45	5.88	3.89	359	11.9
2019	11	12	8	30	0.54	5.56	3.95	359	11.9
2019	11	12	9	0	0.72	5.88	4.2	0	11.9
2019	11	12	9	30	0.86	6.67	4.4	0	11.9
2019	11	12	10	0	0.9	6.25	4.35	1	11.9
2019	11	12	10	30	0.92	6.67	4.11	357	11.9
2019	11	12	11	0	0.89	6.67	4.12	357	11.9
2019	11	12	11	30	0.77	5.88	3.84	357	11.9
2019	11	12	12	0	0.78	6.25	3.97	357	11.9
2019	11	12	12	30	0.79	5.88	4.14	6	11.9
2019	11	12	13	0	0.74	5.88	3.9	359	11.9
2019	11	12	13	30	0.72	6.25	3.54	356	11.9
2019	11	12	14	0	0.81	3.23	3.47	219	11.9
2019	11	12	14	30	0.88	3.33	3.47	224	11.9
2019	11	12	15	0	0.85	3.45	3.42	229	11.9
2019	11	12	15	30	0.81	3.45	3.35	236	11.9
2019	11	12	16	0	0.8	3.57	3.34	234	11.9
2019	11	12	16	30	0.74	3.23	3.31	238	11.9
2019	11	12	17	0	0.69	3.23	3.26	239	11.9
2019	11	12	17	30	0.61	3.12	3.29	243	11.9
2019	11	12	18	0	0.67	2.86	3.19	300	11.9
2019	11	12	18	30	0.9	4	3.56	345	11.9
2019	11	12	19	0	1.07	5.26	3.9	0	11.8
2019	11	12	19	30	1.11	4.55	3.93	338	11.8
2019	11	12	20	0	0.99	5	3.83	347	11.8
2019	11	12	20	30	0.96	4.35	3.75	333	11.8
2019	11	12	21	0	1.17	5	3.98	350	11.8
2019	11	12	21	30	1.5	5	4.27	340	11.8
2019	11	12	22	0	1.53	5.26	4.43	338	11.8
2019	11	12	22	30	1.59	5.56	4.49	342	11.8
2019	11	12	23	0	1.7	5.88	4.66	340	11.8
2019	11	12	23	30	1.74	5.88	4.66	342	11.8
2019	11	13	0	0	1.71	5.56	4.57	336	11.7
2019	11	13	0	30	1.67	5.88	4.53	342	11.7
2019	11	13	1	0	1.7	5.88	4.65	342	11.7
2019	11	13	1	30	1.84	5.56	4.73	338	11.7
2019	11	13	2	0	2.01	5.88	4.98	345	11.7
2019	11	13	3	0	2.05	5.88	5.03	340	11.7
2019	11	13	3	30	1.99	6.25	4.93	352	11.7
2019	11	13	4	0	1.76	5.88	4.71	345	11.7
2019	11	13	4	30	1.9	5.88	4.91	345	11.6
2019	11	13	5	0	1.8	6.25	4.86	347	11.6
2019	11	13	5	30	1.66	6.25	4.79	346	11.6
2019	11	13	6	0	1.87	6.67	5.05	350	11.6
2019	11	13	6	30	1.76	6.67	4.95	349	11.6
2019	11	13	7	0	1.64	5.88	4.79	343	11.6
2019	11	13	7	30	1.79	6.67	4.94	349	11.5
2019	11	13	8	30	1.62	6.25	4.82	345	11.5
2019	11	13	9	0	1.71	6.67	4.92	356	11.5
2019	11	13	9	30	1.73	5.88	4.95	343	11.5
2019	11	13	10	0	1.76	6.67	4.88	354	11.5
2019	11	13	10	30	1.87	6.67	4.97	353	11.4
2019	11	13	11	0	1.9	6.67	4.91	347	11.4
2019	11	13	11	30	1.8	6.25	4.82	345	11.4
2019	11	13	12	0	1.77	5.88	4.81	339	11.4
2019	11	13	12	30	1.78	5.56	4.69	336	11.4
2019	11	13	13	30	1.86	5.88	4.69	347	11.3
2019	11	13	14	0	1.83	6.25	4.7	350	11.3
2019	11	13	14	30	1.83	6.25	4.86	343	11.3
2019	11	13	15	0	1.69	6.25	4.69	352	11.4
2019	11	13	15	30	1.56	6.25	4.6	352	11.3
2019	11	13	16	0	1.44	6.25	4.62	0	11.3
2019	11	13	16	30	1.46	6.67	4.55	359	11.3
2019	11	13	17	0	1.5	6.67	4.59	356	11.3
2019	11	13	17	30	1.41	6.25	4.52	353	11.3
2019	11	13	18	0	1.47	5.88	4.61	343	11.3
2019	11	13	18	30	1.39	5.88	4.57	349	11.3
2019	11	13	19	0	1.4	5.88	4.52	345	11.3
2019	11	13	19	30	1.27	5.26	4.46	339	11.3
2019	11	13	20	0	1.32	5.88	4.46	347	11.3
2019	11	13	20	30	1.3	5.56	4.48	343	11.3
2019	11	13	21	0	1.37	5.26	4.41	340	11.3
2019	11	13	21	30	1.36	5.56	4.37	347	11.3
2019	11	13	22	0	1.32	5.26	4.46	347	11.2
2019	11	13	22	30	1.3	5.88	4.43	354	11.2
2019	11	13	23	30	1.28	5.88	4.27	0	11.2
2019	11	14	0	0	1.21	5.88	4.21	357	11.2
2019	11	14	0	30	1.31	5.56	4.26	354	11.2
2019	11	14	1	0	1.31	5.56	4.22	356	11.1
2019	11	14	1	30	1.22	5.88	4.1	357	11.1
2019	11	14	2	0	1.28	5.56	4.22	354	11.1
2019	11	14	2	30	1.28	5.56	4.24	357	11.1
2019	11	14	3	0	1.14	5.56	4.17	354	11.1
2019	11	14	3	30	1.14	5.56	4.16	354	11
2019	11	14	4	0	1.11	5.56	4.18	356	11
2019	11	14	4	30	1.04	5.56	4.28	353	11
2019	11	14	5	0	0.92	5.88	4.21	354	11
2019	11	14	5	30	0.9	5.56	4.3	353	11
2019	11	14	6	0	0.78	5	4.16	349	11
2019	11	14	6	30	0.77	5.56	4.09	353	11
2019	11	14	7	0	0.7	5.56	4.16	354	11
2019	11	14	7	30	0.67	5.26	4.05	349	11
2019	11	14	8	0	0.65	5.56	4.04	353	11.1
2019	11	14	8	30	0.59	5	3.99	349	11
2019	11	14	9	0	0.53	5	3.88	353	11
2019	11	14	9	30	0.51	5.26	3.77	353	11
2019	11	14	10	0	0.47	5	3.75	352	11
2019	11	14	10	30	0.49	4.76	3.65	352	11
2019	11	14	11	0	0.47	5	3.35	1	11
2019	11	14	11	30	0.45	4.55	3.11	352	11
2019	11	14	12	0	0.44	4.76	3.2	9	11
2019	11	14	12	30	0.41	5	3.15	6	11
2019	11	14	13	0	0.38	4.76	3.12	6	11
2019	11	14	13	30	0.36	5	3.18	9	11
2019	11	14	14	0	0.33	4.76	3.23	7	11
2019	11	14	14	30	0.3	4	3.21	357	11
2019	11	14	15	0	0.28	4.35	3.28	10	11
2019	11	14	15	30	0.26	4.76	3.24	3	11
2019	11	14	16	0	0.23 9	9	3.2	999	11
2019	11	14	16	30	0.21 9	9	3.15	999	11
2019	11	14	17	0	0.25	4.55	2.68	359	11
2019	11	14	17	30	9.00 9	9.00 9	9	999	11
2019	11	14	18	0	0.28	2.17	2.36	156	11
2019	11	14	18	30	0.32	2.27	2.33	158	11
2019	11	14	19	0	0.38	2.56	2.39	156	11
2019	11	14	19	30	0.42	2.78	2.43	149	11
2019	11	14	20	0	0.45	2.78	2.54	155	11
2019	11	14	20	30	0.47	2.78	2.52	155	11
2019	11	14	21	0	0.43	2.63	2.45	153	11
2019	11	14	21	30	0.37	2.5	2.36	146	11
2019	11	14	22	0	0.29	2.5	2.28	139	11
2019	11	14	22	30	0.23 9	9	2.17	999	10.9
2019	11	14	23	0	0.26	2	2.13	149	10.9
2019	11	14	23	30	0.28	2.27	2.23	146	10.9
2019	11	15	0	0	0.28	2.27	2.24	146	10.9
2019	11	15	0	30	0.24 9	9	2.25	999	10.9
2019	11	15	1	0	0.20 9	9	2.17	999	10.9
2019	11	15	1	30	0.20 9	9	2.08	999	10.9
2019	11	15	2	0	0.24 9	9	2.08	999	10.9
2019	11	15	2	30	0.27	2.13	2.17	187	11
2019	11	15	3	0	0.26	2.22	2.2	191	10.9
2019	11	15	3	30	0.24 9	9	2.18	999	10.9
2019	11	15	4	0	0.20 9	9	2.14	999	10.9
2019	11	15	4	30	0.17 9	9	2.09	999	10.9
2019	11	15	5	0	9.00 9	9.00 9	9	999	10.9
2019	11	15	5	30	9.00 9	9.00 9	9	999	10.8
2019	11	15	6	0	0.20 9	9	2.1	999	10.8
2019	11	15	6	30	0.24 9	9	2.14	999	10.9
2019	11	15	7	0	0.29	2.33	2.22	281	10.9
2019	11	15	7	30	0.38	2.44	2.35	279	10.9
2019	11	15	8	0	0.38	2.63	2.44	277	10.9
2019	11	15	8	30	0.4	2.78	2.49	283	10.9
2019	11	15	9	0	0.41	2.63	2.51	279	10.9
2019	11	15	9	30	0.41	2.7	2.55	284	10.9
2019	11	15	10	0	0.4	2.7	2.53	284	10.9
2019	11	15	10	30	0.44	2.86	2.54	293	10.9
2019	11	15	11	0	0.44	2.56	2.57	277	10.9
2019	11	15	11	30	0.44	2.86	2.58	295	10.9
2019	11	15	12	0	0.42	2.78	2.53	293	10.9
2019	11	15	12	30	0.43	2.78	2.53	286	10.9
2019	11	15	13	0	0.43	2.7	2.53	274	10.8
2019	11	15	13	30	0.41	2.56	2.52	269	10.9
2019	11	15	14	0	0.42	2.63	2.51	259	10.9
2019	11	15	14	30	0.43	2.56	2.52	253	10.8
2019	11	15	15	0	0.42	2.63	2.46	232	10.9
2019	11	15	15	30	0.43	2.7	2.52	232	10.8
2019	11	15	16	0	0.44	2.78	2.55	239	10.8
2019	11	15	16	30	0.48	2.94	2.62	242	10.8
2019	11	15	17	0	0.54	2.86	2.68	243	10.8
2019	11	15	17	30	0.57	3.23	2.85	239	10.8
2019	11	15	18	0	0.64	3.45	2.89	245	10.8
2019	11	15	18	30	0.64	3.33	2.87	239	10.8
2019	11	15	19	0	0.64	3.33	2.83	245	10.8
2019	11	15	19	30	0.7	3.45	2.97	238	10.8
2019	11	15	20	30	0.72	3.45	3.01	241	10.8
2019	11	15	21	0	0.73	3.45	3.02	243	10.8
2019	11	15	21	30	0.65	3.45	2.9	248	10.9
2019	11	15	22	0	0.61	3.12	2.86	243	10.9
2019	11	15	22	30	0.54	3.23	2.74	243	10.9
2019	11	15	23	0	0.46	3.03	2.62	253	10.9
2019	11	15	23	30	0.43	3.03	2.59	245	10.9
2019	11	16	0	0	0.45	2.86	2.57	243	10.8
2019	11	16	0	30	0.41	2.78	2.47	262	10.8
2019	11	16	1	0	0.42	2.7	2.49	250	10.8
2019	11	16	1	30	0.43	2.7	2.51	252	10.8
2019	11	16	2	0	0.44	2.7	2.54	259	10.8
2019	11	16	2	30	0.46	2.78	2.55	260	10.8
2019	11	16	3	0	0.45	2.7	2.54	271	10.8
2019	11	16	3	30	0.51	2.7	2.59	281	10.7
2019	11	16	4	0	0.79	3.23	2.94	333	10.7
2019	11	16	4	30	1.04	4.35	3.51	347	10.6
2019	11	16	5	0	1.11	4.35	3.66	338	10.6
2019	11	16	5	30	1.09	5	3.79	349	10.6
2019	11	16	6	0	1.09	5	3.82	346	10.6
2019	11	16	6	30	1.14	4.76	3.93	343	10.6
2019	11	16	7	0	1.11	5	3.89	340	10.6
2019	11	16	7	30	1.4	5.26	4.16	345	10.6
2019	11	16	8	0	1.78	5.56	4.72	343	10.6
2019	11	16	8	30	2.04	6.25	5.03	349	10.6
2019	11	16	9	0	2.21	6.25	5.25	338	10.6
2019	11	16	9	30	2.5	6.25	5.52	342	10.6
2019	11	16	10	0	2.51	6.67	5.72	349	10.6
2019	11	16	10	30	2.78	7.14	5.95	349	10.7
2019	11	16	11	0	2.71	7.14	5.88	353	10.7
2019	11	16	11	30	2.68	7.14	5.81	354	10.6
2019	11	16	12	0	2.37	7.14	5.63	353	10.6
2019	11	16	12	30	2.58	7.14	5.8	1	10.6
2019	11	16	13	0	2.52	7.14	5.78	0	10.6
2019	11	16	13	30	2.44	7.14	5.59	1	10.6
2019	11	16	14	0	2.3	7.14	5.6	0	10.6
2019	11	16	14	30	2.43	7.69	5.57	3	10.6
2019	11	16	15	0	2.07	7.69	5.26	0	10.6
2019	11	16	15	30	2.22	7.69	5.34	3	10.6
2019	11	16	16	0	2.15	7.69	5.29	1	10.6
2019	11	16	16	30	2.16	7.14	5.22	1	10.5
2019	11	16	17	0	2.14	6.25	5.28	3	10.5
2019	11	16	17	30	2	7.14	5.13	3	10.5
2019	11	16	18	0	1.86	6.67	4.9	7	10.5
2019	11	16	18	30	1.66	5.88	4.68	1	10.5
2019	11	16	19	0	1.74	5.88	4.79	0	10.5
2019	11	16	19	30	1.64	7.14	4.76	3	10.5
2019	11	16	20	0	1.53	6.67	4.8	0	10.5
2019	11	16	20	30	1.51	6.25	4.77	359	10.5
2019	11	16	21	0	1.58	6.67	4.75	0	10.5
2019	11	16	21	30	1.39	5.56	4.54	0	10.4
2019	11	16	22	0	1.35	6.67	4.52	0	10.3
2019	11	16	22	30	1.34	6.67	4.62	3	9.9
2019	11	16	23	0	1.25	6.67	4.44	6	9.6
2019	11	16	23	30	1.21	4.55	4.31	1	9.4
2019	11	17	0	0	1.12	6.25	4.28	7	9.4
2019	11	17	0	30	1.09	5	3.99	0	9.5
2019	11	17	1	0	1.08	5	3.98	3	9.6
2019	11	17	1	30	1.01	4.76	3.87	6	9.7
2019	11	17	2	0	0.95	5.88	3.78	7	9.7
2019	11	17	2	30	0.94	5.56	3.75	7	9.7
2019	11	17	3	0	0.9	3.33	3.65	30	9.7
2019	11	17	3	30	0.91	5.88	3.69	14	9.6
2019	11	17	4	0	0.83	5.56	3.6	10	9.5
2019	11	17	4	30	0.87	5.56	3.6	9	9.5
2019	11	17	5	0	0.9	5.26	3.67	10	9.4
2019	11	17	5	30	0.91	5.56	3.63	9	9.5
2019	11	17	6	0	0.89	5.56	3.64	9	9.5
2019	11	17	6	30	0.88	5.56	3.61	4	9.5
2019	11	17	7	0	0.93	3.85	3.64	20	9.5
2019	11	17	7	30	0.96	3.57	3.64	44	9.4
2019	11	17	8	0	0.9	3.85	3.52	39	9.4
2019	11	17	8	30	0.91	5.56	3.63	1	9.7
2019	11	17	9	0	0.9	3.85	3.63	31	9.8
2019	11	17	9	30	0.97	4	3.62	34	9.8
2019	11	17	10	0	0.99	3.33	3.71	55	9.9
2019	11	17	10	30	1.03	3.57	3.68	52	9.7
2019	11	17	11	0	0.99	5.56	3.8	3	9
2019	11	17	11	30	0.99	4	3.66	37	9
2019	11	17	12	0	1.1	3.85	3.82	44	8.9
2019	11	17	12	30	1.09	3.57	3.74	54	8.9
2019	11	17	13	0	1.07	4.17	3.71	35	8.9
2019	11	17	13	30	1.04	4	3.74	44	8.9
2019	11	17	14	0	1.06	4.17	3.72	34	8.9
2019	11	17	14	30	1.07	3.85	3.71	39	8.9
2019	11	17	15	0	1.12	3.85	3.75	52	8.9
2019	11	17	15	30	1.07	4.17	3.71	46	8.9
2019	11	17	16	0	1.03	3.85	3.63	56	8.9
2019	11	17	16	30	0.97	4	3.57	49	8.9
2019	11	17	17	0	0.89	3.85	3.54	55	8.9
2019	11	17	17	30	0.88	3.85	3.42	51	8.9
2019	11	17	18	0	0.88	3.57	3.42	59	8.9
2019	11	17	18	30	0.89	3.57	3.4	68	8.9
2019	11	17	19	0	0.91	3.7	3.46	66	8.9
2019	11	17	19	30	0.86	3.57	3.39	65	8.9
2019	11	17	20	0	0.87	3.57	3.4	70	8.9
2019	11	17	20	30	0.89	3.7	3.37	70	8.9
2019	11	17	21	0	0.88	3.85	3.34	68	9
2019	11	17	21	30	0.83	4	3.33	58	9
2019	11	17	22	0	0.92	3.85	3.38	62	9
2019	11	17	22	30	0.94	3.85	3.46	61	9
2019	11	17	23	0	0.96	4	3.44	59	9
2019	11	17	23	30	0.96	3.85	3.45	55	9
2019	11	18	0	0	0.98	3.85	3.46	55	9.1
2019	11	18	0	30	1.01	4.17	3.5	49	9.1
2019	11	18	1	0	0.96	4	3.46	59	9.2
2019	11	18	1	30	1.03	4.17	3.53	49	9.2
2019	11	18	2	0	1	4	3.49	58	9.2
2019	11	18	2	30	1.11	4	3.59	58	9.2
2019	11	18	3	0	1.13	4.17	3.62	58	9.1
2019	11	18	3	30	1.1	4	3.56	55	9.1
2019	11	18	4	0	1.02	3.85	3.44	58	9.1
2019	11	18	4	30	1.05	4	3.52	48	9.1
2019	11	18	5	0	1.05	4.17	3.54	42	9.1
2019	11	18	5	30	1.09	4	3.62	48	9.1
2019	11	18	6	0	1.07	4.17	3.6	37	9.1
2019	11	18	6	30	1.08	4.35	3.6	46	9
2019	11	18	7	0	1.13	4.55	3.67	38	9
2019	11	18	7	30	1.18	4.17	3.78	42	9
2019	11	18	8	0	1.18	4.35	3.73	46	9
2019	11	18	8	30	1.18	4.55	3.79	37	9
2019	11	18	9	0	1.21	4.55	3.88	35	9.1
2019	11	18	9	30	1.39	4.76	4.09	35	9.1
2019	11	18	10	0	1.27	4.76	4.02	30	9.1
2019	11	18	10	30	1.35	4.55	4.03	34	9.1
2019	11	18	11	0	1.31	4.55	4.09	30	9.1
2019	11	18	11	30	1.32	5.26	4.08	16	9.1
2019	11	18	12	0	1.51	4.55	4.21	30	9.2
2019	11	18	12	30	1.41	5	4.14	18	9.2
2019	11	18	13	30	1.5	5	4.26	20	9.3
2019	11	18	14	0	1.56	4.55	4.27	32	9.5
2019	11	18	14	30	1.61	4.55	4.32	24	9.5
2019	11	18	15	0	1.71	5.56	4.45	6	9.5
2019	11	18	15	30	1.79	4.76	4.56	18	9.5
2019	11	18	16	0	1.84	6.67	4.78	6	9.5
2019	11	18	16	30	1.85	5.88	4.7	4	9.6
2019	11	18	17	0	1.97	5.88	4.89	9	9.7
2019	11	18	17	30	1.97	5.88	4.76	6	9.8
2019	11	18	18	0	2.17	6.67	5.1	3	9.8
2019	11	18	18	30	2.43	6.67	5.32	357	9.9
2019	11	18	19	0	2.49	7.14	5.5	1	9.9
2019	11	18	19	30	2.78	6.67	5.82	3	9.9
2019	11	18	20	0	2.84	7.69	6.05	0	9.9
2019	11	18	20	30	2.81	7.69	6.04	1	9.9
2019	11	18	21	0	2.78	7.69	6	0	10
2019	11	18	21	30	2.88	7.69	6.16	3	10
2019	11	18	22	0	2.6	7.69	6.06	6	10.1
2019	11	18	22	30	2.66	8.33	6.05	4	10.1
2019	11	18	23	0	2.56	8.33	5.98	3	10.1
2019	11	18	23	30	2.52	8.33	5.93	7	10.1
2019	11	19	0	0	2.38	7.69	5.73	6	10.1
2019	11	19	0	30	2.34	7.69	5.91	4	10.2
2019	11	19	1	0	2.24	7.69	5.7	7	10.2
2019	11	19	1	30	2.12	7.69	5.5	4	10.2
2019	11	19	2	0	1.76	7.69	5.11	1	10.2
2019	11	19	2	30	1.89	5.88	5.07	0	10.2
2019	11	19	3	0	1.8	5.88	5.06	0	10.2
2019	11	19	3	30	1.72	7.14	4.97	359	10.2
2019	11	19	4	0	1.7	6.67	4.8	1	10.2
2019	11	19	4	30	1.58	5	4.66	353	10.2
2019	11	19	5	0	1.48	5.26	4.66	356	10.2
2019	11	19	5	30	1.42	6.67	4.63	1	10.2
2019	11	19	6	0	1.33	5.56	4.6	359	10.2
2019	11	19	6	30	1.23	5.88	4.56	1	10.2
2019	11	19	7	0	1.16	6.25	4.36	3	10.2
2019	11	19	7	30	1.09	6.25	4.53	1	10.1
2019	11	19	8	0	1.07	5.26	4.45	1	10.1
2019	11	19	8	30	1	5.56	4.64	359	10.1
2019	11	19	9	0	0.95	5	4.58	359	10.1
2019	11	19	9	30	0.9	6.67	4.77	1	10.1
2019	11	19	10	0	0.88	5.56	4.83	6	10.1
2019	11	19	10	30	0.85	5.88	4.93	3	10.1
2019	11	19	11	0	0.8	7.14	4.91	7	10.1
2019	11	19	11	30	0.8	5.88	4.75	3	10.1
2019	11	19	12	0	0.74 1	0.53	4.85	356	10.1
2019	11	19	12	30	0.75 1	1.76	4.98	359	10.1
2019	11	19	13	0	0.7	6.67	4.93	6	10.1
2019	11	19	13	30	0.66 1	2.5	5.02	1	10.2
2019	11	19	14	0	0.73 1	2.5	5.24	0	10.3
2019	11	19	14	30	0.73	5.88	5.13	4	10.3
2019	11	19	15	0	0.72 1	1.11	5.12	1	10.3
2019	11	19	15	30	0.64 1	1.76	4.85	3	10.3
2019	11	19	16	0	0.62 1	1.11	4.86	0	10.4
2019	11	19	16	30	0.56 1	1.76	4.98	356	10.4
2019	11	19	17	0	0.52 1	1.11	4.62	1	10.4
2019	11	19	17	30	0.50 1	2.5	4.56	1	10.3
2019	11	19	18	0	0.50 1	2.5	4.75	0	10.3
2019	11	19	18	30	0.49 1	1.76	4.55	352	10.3
2019	11	19	19	0	0.45 1	2.5	4.26	4	10.3
2019	11	19	19	30	0.48 1	1.11	3.81	357	10.3
2019	11	19	20	0	0.46 1	2.5	4.15	3	10.2
2019	11	19	20	30	0.45 1	1.76	4.23	359	10.2
2019	11	19	21	0	0.41 1	1.76	4.37	6	10.2
2019	11	19	21	30	0.38 1	1.11	4.45	0	10.2
2019	11	19	22	0	0.40 1	1.11	4.72	357	10.2
2019	11	19	22	30	0.37 1	1.11	4.45	0	10.2
2019	11	19	23	0	0.37 1	1.11	4.09	354	10.2
2019	11	19	23	30	0.39 1	1.76	4.14	6	10.2
2019	11	20	0	0	0.39	5.88	3.91	0	10.2
2019	11	20	0	30	0.38 1	1.76	3.91	1	10.2
2019	11	20	1	0	0.37	5.26	4.12	354	10.3
2019	11	20	1	30	0.36	5.26	4.25	3	10.3
2019	11	20	2	0	0.39	4.55	4.12	4	10.3
2019	11	20	2	30	0.41 1	1.11	3.86	356	10.3
2019	11	20	3	0	0.44 1	1.11	3.44	0	10.3
2019	11	20	3	30	0.46 1	0.53	3.28	356	10.4
2019	11	20	4	0	0.45 1	1.11	3.25	352	10.4
2019	11	20	4	30	0.48	2.94	3.11	0	10.3
2019	11	20	5	0	0.48	3.12	3.1	359	10.3
2019	11	20	5	30	0.47 1	0.53	3.12	3	10.3
2019	11	20	6	0	0.45	3.23	3.06	354	10.3
2019	11	20	6	30	0.4	3.03	3.01	346	10.3
2019	11	20	7	0	0.38 1	0.53	3.01	6	10.3
2019	11	20	7	30	0.36 1	0.53	3.18	3	10.3
2019	11	20	8	0	0.34 1	1.11	3.04	359	10.3
2019	11	20	8	30	0.32	9.88	3.27	1	10.2
2019	11	20	9	0	0.31	9.88	3.12	356	10.2
2019	11	20	9	30	0.34 1	0.53	3.04	354	10.2
2019	11	20	10	0	0.43	3.12	2.84	347	10.2
2019	11	20	10	30	0.49	3.12	2.94	354	10.2
2019	11	20	11	0	0.63	3.45	3.08	359	10.2
2019	11	20	11	30	0.8	3.7	3.35	9	10.2
2019	11	20	12	0	0.82	4.17	3.47	359	10.2
2019	11	20	12	30	0.82	4.17	3.5	3	10.3
2019	11	20	13	0	0.77	4.17	3.49	0	10.3
2019	11	20	13	30	0.77	3.85	3.53	7	10.3
2019	11	20	14	0	0.73	3.45	3.53	11	10.3
2019	11	20	14	30	0.73	5	3.51	0	10.3
2019	11	20	15	0	0.75	3.57	3.45	9	10.3
2019	11	20	15	30	0.74	5	3.55	3	10.3
2019	11	20	16	0	0.85	3.7	3.44	3	10.3
2019	11	20	16	30	0.88	3.85	3.55	7	10.3
2019	11	20	17	0	0.93	4.35	3.62	3	10.3
2019	11	20	17	30	1	4	3.64	6	10.3
2019	11	20	18	0	1.02	4.76	3.72	0	10.3
2019	11	20	18	30	1.03	4.55	3.71	354	10.3
2019	11	20	19	0	1.1	4.76	3.78	3	10.3
2019	11	20	19	30	1.12	5	3.84	1	10.3
2019	11	20	20	0	1.14	4.76	3.9	3	10.3
2019	11	20	20	30	1.14	5	3.87	356	10.3
2019	11	20	21	0	1.22	5	3.95	357	10.2
2019	11	20	21	30	1.24	4.76	3.94	357	10.2
2019	11	20	22	0	1.24	5.26	4.06	353	10.2
2019	11	20	22	30	1.21	5	4.07	357	10.2
2019	11	20	23	0	1.13	4.76	4.02	354	10.2
2019	11	20	23	30	1.26	5	4.08	354	10.2
2019	11	21	0	0	1.3	5	4.14	359	10.2
2019	11	21	0	30	1.23	5.26	4.24	356	10.2
2019	11	21	1	0	1.21	5.26	4.24	359	10.2
2019	11	21	1	30	1.26	5.56	4.34	359	10.2
2019	11	21	2	0	1.25	5.26	4.25	359	10.1
2019	11	21	2	30	1.23	5.56	4.2	6	10.1
2019	11	21	3	0	1.2	5.26	4.16	356	10.1
2019	11	21	3	30	1.29	5	4.24	356	10.1
2019	11	21	4	0	1.29	5.56	4.34	353	10.1
2019	11	21	4	30	1.33	5	4.29	356	10.1
2019	11	21	5	0	1.42	5.56	4.37	357	10
2019	11	21	5	30	1.41	5.56	4.24	356	10
2019	11	21	6	0	1.51	5.56	4.35	356	10
2019	11	21	6	30	1.57	5.56	4.46	356	10
2019	11	21	7	0	1.54	5.56	4.39	1	10
2019	11	21	7	30	1.52	5.56	4.46	1	9.9
2019	11	21	8	0	1.52	5.88	4.38	359	9.9
2019	11	21	8	30	1.56	5.88	4.39	1	9.9
2019	11	21	9	0	1.41	5.26	4.32	359	9.9
2019	11	21	9	30	1.42	5.56	4.34	359	9.8
2019	11	21	10	0	1.49	5.56	4.35	359	9.8
2019	11	21	10	30	1.41	5.56	4.3	359	9.8
2019	11	21	11	0	1.46	5.26	4.31	359	9.8
2019	11	21	11	30	1.43	5.56	4.41	353	9.8
2019	11	21	12	0	1.34	5.26	4.38	350	9.8
2019	11	21	12	30	1.35	5.26	4.43	356	9.9
2019	11	21	13	0	1.24	4.76	4.27	347	9.9
2019	11	21	13	30	1.28	5.26	4.28	353	9.9
2019	11	21	14	0	1.25	4.76	4.24	350	9.9
2019	11	21	14	30	1.18	5	4.24	359	10.1
2019	11	21	15	0	1.13	5	4.26	356	10.2
2019	11	21	15	30	1.13	5	4.21	353	10.2
2019	11	21	16	0	1.06	5.56	4.13	3	10.2
2019	11	21	16	30	1.02	4.35	3.9	354	10.2
2019	11	21	17	0	1.02	5.26	3.89	359	10.2
2019	11	21	17	30	0.96	4	3.82	359	10.2
2019	11	21	18	0	0.91	4.76	3.69	0	10.2
2019	11	21	19	0	0.8	4	3.6	357	10.2
2019	11	21	19	30	0.75	4.17	3.55	354	10.2
2019	11	21	20	0	0.64	3.85	3.41	0	10.2
2019	11	21	20	30	0.59	3.7	3.44	1	10.2
2019	11	21	21	0	0.57	4	3.55	356	10.2
2019	11	21	21	30	0.5	4	3.51	359	10.1
2019	11	21	22	0	0.49	5	3.54	4	10.1
2019	11	21	22	30	0.47	4.35	3.63	4	10.1
2019	11	21	23	0	0.44	4.35	3.61	0	10.1
2019	11	21	23	30	0.4	4	3.72	1	10.1
2019	11	22	0	0	0.38	4	3.78	359	10.1
2019	11	22	0	30	0.37	4.17	4.04	0	10.1
2019	11	22	1	0	0.34	5.88	4.15	0	10.1
2019	11	22	1	30	0.32	7.69	4.26	352	10.1
2019	11	22	2	0	0.37	8.33	3.9	357	10.1
2019	11	22	2	30	0.4	8.33	3.5	7	10.1
2019	11	22	3	0	0.4	8.33	3.24	4	10
2019	11	22	3	30	0.39	6.25	3.03	357	10
2019	11	22	4	0	0.39	2.13	2.73	159	9.8
2019	11	22	4	30	0.36	2.13	2.72	184	9.8
2019	11	22	5	0	0.36	2.13	2.68	176	9.8
2019	11	22	5	30	0.34	2.13	2.7	177	10
2019	11	22	6	0	0.32	2.38	2.8	176	10
2019	11	22	6	30	0.3	2.27	2.73	166	10
2019	11	22	7	0	0.29	2.27	2.65	162	10
2019	11	22	7	30	0.29	2.08	2.56	158	10
2019	11	22	8	0	0.27	2.08	2.59	169	10
2019	11	22	8	30	0.3	2.27	2.43	172	10
2019	11	22	9	0	0.32	2.38	2.39	183	10
2019	11	22	9	30	0.33	2.38	2.44	176	9.9
2019	11	22	10	0	0.32	2.44	2.5	173	9.9
2019	11	22	10	30	0.3	2.5	2.53	167	9.9
2019	11	22	11	0	0.3	2.5	2.45	166	10
2019	11	22	11	30	0.32	2.44	2.41	187	10
2019	11	22	12	0	0.4	2.44	2.41	198	10
2019	11	22	12	30	0.49	2.86	2.61	214	9.9
2019	11	22	13	0	0.51	2.78	2.71	208	9.8
2019	11	22	13	30	0.59	3.23	2.81	219	9.9
2019	11	22	14	0	0.58	3.12	2.82	212	9.9
2019	11	22	14	30	0.64	3.33	2.89	226	10
2019	11	22	15	0	0.7	3.33	3.01	231	10
2019	11	22	15	30	0.74	3.45	3.06	235	10
2019	11	22	16	0	0.72	3.57	3	241	10.1
2019	11	22	17	0	0.81	3.45	3.11	238	10.1
2019	11	22	17	30	0.8	3.85	3.23	234	10.1
2019	11	22	18	0	0.82	3.57	3.18	242	10.1
2019	11	22	18	30	0.67	3.23	3.01	226	10.1
2019	11	22	19	0	0.65	3.57	3	241	10.1
2019	11	22	19	30	0.71	3.45	3.05	239	10.1
2019	11	22	20	0	0.78	3.57	3.16	246	10.1
2019	11	22	20	30	0.83	3.85	3.28	236	10.1
2019	11	22	21	0	0.66	3.57	3.11	253	10.1
2019	11	22	21	30	0.58	3.45	2.75	248	10
2019	11	22	22	0	0.84	3.03	2.99	290	10
2019	11	22	22	30	0.93	3.85	3.35	301	10
2019	11	22	23	0	0.91	4.17	3.32	321	10
2019	11	22	23	30	1.04	4.55	3.49	332	9.9
2019	11	23	0	30	1.24	4.76	3.86	329	9.9
2019	11	23	1	0	1.28	4.76	3.96	325	9.9
2019	11	23	1	30	1.22	4.76	3.91	325	9.9
2019	11	23	2	0	1.27	5.26	4.08	336	9.9
2019	11	23	2	30	1.24	5.26	4.14	339	10
2019	11	23	3	0	1.23	5	4.08	335	10
2019	11	23	3	30	1.23	5.26	4.03	333	10
2019	11	23	4	0	1.18	4.76	3.98	335	10
2019	11	23	4	30	1.16	5.26	4.07	338	10
2019	11	23	5	0	1.14	5.56	4.06	340	9.9
2019	11	23	5	30	1.1	4.35	3.89	332	9.9
2019	11	23	6	0	1.1	5	3.89	339	9.9
2019	11	23	6	30	1.16	5	3.99	339	9.9
2019	11	23	7	0	1.27	5	4.1	342	9.9
2019	11	23	7	30	1.35	5.88	4.34	346	9.9
2019	11	23	8	30	1.25	5.26	4.32	343	9.9
2019	11	23	9	0	1.4	6.25	4.57	3	9.9
2019	11	23	9	30	1.36	6.25	4.57	4	9.9
2019	11	23	10	0	1.35	6.25	4.37	0	9.9
2019	11	23	10	30	1.26	6.25	4.37	4	9.9
2019	11	23	11	0	1.18	5.88	4.2	1	9.9
2019	11	23	11	30	1.15	6.25	4.04	4	9.8
2019	11	23	12	0	1.2	4.35	4	345	9.8
2019	11	23	12	30	1.12	4.55	3.88	349	9.8
2019	11	23	13	0	1.08	4.76	3.94	352	9.8
2019	11	23	13	30	1.03	5.88	3.97	4	9.8
2019	11	23	14	0	0.91	4.76	3.81	353	9.8
2019	11	23	14	30	0.92	5.88	3.92	3	9.8
2019	11	23	15	0	0.86	4.76	3.76	353	9.8
2019	11	23	15	30	0.77	5	3.59	357	9.8
2019	11	23	16	0	0.71	4.76	3.56	354	9.8
2019	11	23	16	30	0.68	4.76	3.52	347	9.8
2019	11	23	17	0	0.64	5	3.46	359	9.8
2019	11	23	17	30	0.59	4.55	3.38	353	9.9
2019	11	23	18	0	0.54	4.55	3.2	349	9.9
2019	11	23	18	30	0.51	4.35	3.06	347	9.9
2019	11	23	19	0	0.5	4.55	3.05	357	9.8
2019	11	23	19	30	0.45	4.17	2.99	354	9.8
2019	11	23	20	0	0.42	4.17	2.95	1	9.8
2019	11	23	20	30	0.39	4	2.91	359	9.8
2019	11	23	21	0	0.37	3.45	2.83	345	9.8
2019	11	23	21	30	0.34	3.57	2.7	352	9.8
2019	11	23	22	0	0.34	2.22	2.61	242	9.8
2019	11	23	22	30	0.36	2.27	2.59	242	9.8
2019	11	23	23	0	0.33	2.27	2.51	243	9.8
2019	11	23	23	30	0.32	2.33	2.55	239	9.8
2019	11	24	0	0	0.31	2.27	2.52	218	9.8
2019	11	24	0	30	0.25	2.04	2.53	222	9.8
2019	11	24	1	0	0.25	2	2.46	229	9.8
2019	11	24	1	30	0.27	2.04	2.34	242	9.8
2019	11	24	2	0	0.25	2.22	2.39	263	9.8
2019	11	24	2	30	0.22 9	9	2.35	999	9.8
2019	11	24	3	30	0.19 9	9	2.28	999	9.8
2019	11	24	4	0	0.15 9	9	2.35	999	9.8
2019	11	24	4	30	9.00 9	9.00 9	9	999	9.8
2019	11	24	5	0	9.00 9	9.00 9	9	999	9.7
2019	11	24	5	30	0.07 9	9	3	999	9.7
2019	11	24	6	0	0.06 9	9	3.46	999	9.8
2019	11	24	6	30	9.00 9	9.00 9	9	999	9.8
2019	11	24	7	0	9.00 9	9.00 9	9	999	9.8
2019	11	24	7	30	0.07 9	9	2.7	999	9.8
2019	11	24	8	0	0.05 9	9	3.09	999	9.8
2019	11	24	8	30	9.00 9	9.00 9	9	999	9.8
2019	11	24	9	0	9.00 9	9.00 9	9	999	9.7
2019	11	24	9	30	9.00 9	9.00 9	9	999	9.7
2019	11	24	10	0	9.00 9	9.00 9	9	999	9.7
2019	11	24	10	30	0.19 9	9	1.99	999	9.7
2019	11	24	11	0	0.27	2.17	2.14	101	9.7
2019	11	24	11	30	0.36	2.38	2.31	91	9.7
2019	11	24	12	0	0.43	2.7	2.49	93	9.7
2019	11	24	12	30	0.45	2.86	2.6	86	9.7
2019	11	24	13	0	0.51	3.03	2.67	84	9.7
2019	11	24	13	30	0.63	3.12	2.85	82	9.7
2019	11	24	14	0	0.79	3.45	3.11	90	9.6
2019	11	24	14	30	0.85	3.57	3.21	89	9.6
2019	11	24	15	0	0.91	3.85	3.36	89	9.6
2019	11	24	15	30	0.91	3.7	3.36	90	9.6
2019	11	24	16	0	0.91	3.85	3.41	86	9.6
2019	11	24	16	30	0.72	3.85	3.15	87	9.6
2019	11	24	17	0	0.65	3.7	2.9	86	9.6
2019	11	24	17	30	0.74	3.45	2.95	91	9.7
2019	11	24	18	0	0.78	3.57	3.06	97	9.7
2019	11	24	18	30	0.85	3.57	3.15	104	9.7
2019	11	24	19	0	0.8	3.7	3.08	101	9.7
2019	11	24	19	30	0.75	3.7	3.1	100	9.8
2019	11	24	20	0	0.68	3.7	2.97	104	9.7
2019	11	24	20	30	0.67	2.94	2.85	174	9.7
2019	11	24	21	0	0.69	3.23	2.98	218	9.7
2019	11	24	21	30	0.66	3.03	2.96	225	9.7
2019	11	24	22	0	0.73	3.23	3.01	232	9.7
2019	11	24	22	30	0.56	3.33	3.01	215	9.7
2019	11	24	23	0	0.66	2.7	2.75	256	9.6
2019	11	24	23	30	0.85	3.45	3.05	311	9.6
2019	11	25	0	0	1.21	4.55	3.81	331	9.6
2019	11	25	0	30	1.71	5.26	4.43	328	9.5
2019	11	25	1	0	1.73	5.26	4.59	329	9.5
2019	11	25	1	30	2.05	7.14	5.02	347	9.5
2019	11	25	2	0	2.23	6.67	5.32	345	9.5
2019	11	25	2	30	2.42	7.69	5.69	350	9.5
2019	11	25	3	0	2.8	7.69	6.05	350	9.5
2019	11	25	3	30	2.89	8.33	6.3	356	9.4
2019	11	25	4	0	2.8	8.33	6.34	359	9.4
2019	11	25	4	30	2.5	7.69	6.03	359	9.4
2019	11	25	5	0	2.29	7.69	5.85	359	9.4
2019	11	25	5	30	2.31	7.69	5.75	3	9.4
2019	11	25	6	0	2.28	8.33	5.8	4	9.4
2019	11	25	6	30	2	7.69	5.48	4	9.4
2019	11	25	7	0	2.11	8.33	5.73	9	9.4
2019	11	25	7	30	1.89	7.69	5.5	7	9.5
2019	11	25	8	0	1.72	7.69	5.19	10	9.4
2019	11	25	8	30	1.67	7.69	5.07	9	9.5
2019	11	25	9	0	1.5	7.14	4.67	9	9.5
2019	11	25	9	30	1.5	7.69	4.61	7	9.5
2019	11	25	10	0	1.5	5.88	4.46	0	9.4
2019	11	25	10	30	1.39	6.67	4.31	4	9.4
2019	11	25	11	0	1.31	5.88	4.14	3	9.4
2019	11	25	11	30	1.37	5	4.12	349	9.3
2019	11	25	12	0	1.31	5	4.1	343	9.3
2019	11	25	12	30	1.25	5.88	4.17	359	9.4
2019	11	25	13	0	1.13	5.56	4.08	354	9.4
2019	11	25	13	30	1.11	6.25	4.12	1	9.4
2019	11	25	14	0	0.95	4.76	4.01	343	9.4
2019	11	25	14	30	0.89	5.88	3.92	1	9.4
2019	11	25	15	0	0.8	5.88	3.99	4	9.4
2019	11	25	15	30	0.75	4.55	3.73	347	9.4
2019	11	25	16	0	0.72	5.88	3.79	4	9.4
2019	11	25	16	30	0.67	4.76	3.68	353	9.4
2019	11	25	17	0	0.62	4.55	3.53	350	9.4
2019	11	25	17	30	0.59	3.7	3.6	336	9.4
2019	11	25	18	0	0.53	4.17	3.66	347	9.4
2019	11	25	18	30	0.49	3.7	3.64	345	9.4
2019	11	25	19	0	0.46	3.85	3.68	342	9.4
2019	11	25	19	30	0.43	3.7	3.52	343	9.5
2019	11	25	20	0	0.39	3.33	3.28	338	9.5
2019	11	25	20	30	0.39	3.33	3.12	338	9.5
2019	11	25	21	0	0.36	3.45	3.06	340	9.5
2019	11	25	21	30	0.34	3.23	3.02	340	9.5
2019	11	25	22	0	0.31	3.23	2.94	342	9.5
2019	11	25	22	30	0.33	2.17	2.69	255	9.4
2019	11	25	23	0	0.31	3.12	2.72	342	9.4
2019	11	25	23	30	0.27	3.12	2.76	345	9.4
2019	11	26	0	0	0.24 9	9	2.75	999	9.3
2019	11	26	0	30	9.00 9	9.00 9	9	999	9.3
2019	11	26	1	0	0.25 1	1.76	2.45	357	9.4
2019	11	26	1	30	0.24 9	9	2.43	999	9.4
2019	11	26	2	0	0.26	2.22	2.4	241	9.4
2019	11	26	2	30	0.25	2.13	2.47	246	9.4
2019	11	26	3	0	0.26	2.27	2.38	256	9.4
2019	11	26	3	30	0.22 9	9	2.4	999	9.4
2019	11	26	4	0	0.21 9	9	2.43	999	9.4
2019	11	26	4	30	9.00 9	9.00 9	9	999	9.4
2019	11	26	5	0	9.00 9	9.00 9	9	999	9.4
2019	11	26	5	30	9.00 9	9.00 9	9	999	9.4
2019	11	26	6	0	0.15 9	9	2.8	999	9.4
2019	11	26	6	30	0.14 9	9	2.98	999	9.3
2019	11	26	7	0	0.13 9	9	3.01	999	9.3
2019	11	26	7	30	0.13 9	9	2.75	999	9.3
2019	11	26	8	0	0.13 9	9	2.81	999	9.3
2019	11	26	8	30	9.00 9	9.00 9	9	999	9.3
2019	11	26	9	0	9.00 9	9.00 9	9	999	9.3
2019	11	26	9	30	9.00 9	9.00 9	9	999	9.3
2019	11	26	10	30	0.12 9	9	2.89	999	9.3
2019	11	26	11	0	9.00 9	9.00 9	9	999	9.3
2019	11	26	11	30	9.00 9	9.00 9	9	999	9.3
2019	11	26	12	0	9.00 9	9.00 9	9	999	9.3
2019	11	26	12	30	9.00 9	9.00 9	9	999	9.3
2019	11	26	13	0	9.00 9	9.00 9	9	999	9.3
2019	11	26	13	30	9.00 9	9.00 9	9	999	9.4
2019	11	26	14	0	9.00 9	9.00 9	9	999	9.4
2019	11	26	14	30	9.00 9	9.00 9	9	999	9.4
2019	11	26	15	0	0.24 9	9	2.17	999	9.4
2019	11	26	15	30	0.26	2.33	2.32	212	9.4
2019	11	26	16	0	0.22 9	9	2.24	999	9.4
2019	11	26	16	30	0.33	2.38	2.33	235	9.5
2019	11	26	17	0	0.5	2.78	2.62	243	9.5
2019	11	26	17	30	0.54	3.03	2.79	241	9.5
2019	11	26	18	0	0.6	3.23	2.87	243	9.4
2019	11	26	18	30	0.64	3.45	2.92	239	9.4
2019	11	26	19	0	0.61	3.33	2.9	242	9.4
2019	11	26	19	30	0.65	3.45	2.91	243	9.4
2019	11	26	20	0	0.71	3.45	2.98	245	9.4
2019	11	26	20	30	0.73	3.7	3.02	248	9.4
2019	11	26	21	0	0.72	3.45	3.02	239	9.4
2019	11	26	21	30	0.64	3.23	2.94	238	9.4
2019	11	26	22	0	0.59	3.33	2.87	245	9.3
2019	11	26	22	30	0.55	3.33	2.79	242	9.4
2019	11	26	23	0	0.52	3.03	2.75	239	9.3
2019	11	26	23	30	0.54	3.12	2.8	241	9.3
2019	11	27	0	0	0.51	3.12	2.77	242	9.4
2019	11	27	0	30	0.55	3.23	2.84	239	9.4
2019	11	27	1	0	0.55	3.23	2.83	238	9.4
2019	11	27	1	30	0.53	3.03	2.81	234	9.4
2019	11	27	2	0	0.48	3.03	2.72	243	9.4
2019	11	27	2	30	0.36	2.94	2.6	243	9.4
2019	11	27	3	0	0.34	2.63	2.53	243	9.4
2019	11	27	3	30	0.33	2.7	2.48	246	9.4
2019	11	27	4	0	0.28	2.63	2.45	239	9.4
2019	11	27	4	30	0.27	2.56	2.37	238	9.4
2019	11	27	5	0	0.3	2.56	2.35	243	9.4
2019	11	27	5	30	0.26	2.5	2.34	252	9.4
2019	11	27	6	0	0.24 9	9	2.34	999	9.4
2019	11	27	6	30	0.22 9	9	2.33	999	9.4
2019	11	27	7	0	0.19 9	9	2.3	999	9.4
2019	11	27	7	30	0.16 9	9	2.26	999	9.3
2019	11	27	8	0	0.13 9	9	2.33	999	9.3
2019	11	27	8	30	0.12 9	9	2.47	999	9.3
2019	11	27	9	0	9.00 9	9.00 9	9	999	9.3
2019	11	27	9	30	9.00 9	9.00 9	9	999	9.3
2019	11	27	10	0	9.00 9	9.00 9	9	999	9.3
2019	11	27	10	30	0.08 9	9	2.86	999	9.3
2019	11	27	11	30	0.08 9	9	3.11	999	9.3
2019	11	27	12	0	0.07 9	9	3.44	999	9.3
2019	11	27	12	30	0.09 9	9	3.09	999	9.3
2019	11	27	13	0	0.07 9	9	3.51	999	9.4
2019	11	27	13	30	0.08 9	9	3.62	999	9.4
2019	11	27	14	0	0.08 9	9	3.54	999	9.4
2019	11	27	14	30	0.08 9	9	3.5	999	9.4
2019	11	27	15	0	0.08 9	9	3.56	999	9.4
2019	11	27	15	30	0.07 9	9	3.78	999	9.4
2019	11	27	16	0	0.08 9	9	3.71	999	9.4
2019	11	27	16	30	9.00 9	9.00 9	9	999	9.4
2019	11	27	17	0	9.00 9	9.00 9	9	999	9.4
2019	11	27	17	30	9.00 9	9.00 9	9	999	9.4
2019	11	27	18	0	9.00 9	9.00 9	9	999	9.4
2019	11	27	18	30	9.00 9	9.00 9	9	999	9.4
2019	11	27	19	30	9.00 9	9.00 9	9	999	9.4
2019	11	27	20	0	9.00 9	9.00 9	9	999	9.4
2019	11	27	20	30	9.00 9	9.00 9	9	999	9.4
2019	11	27	21	0	9.00 9	9.00 9	9	999	9.4
2019	11	27	21	30	0.23 9	9	2.25	999	9.4
2019	11	27	22	0	0.22 9	9	2.18	999	9.4
2019	11	27	22	30	0.24 9	9	2.21	999	9.4
2019	11	27	23	0	0.25	2.38	2.24	155	9.4
2019	11	27	23	30	0.24 9	9	2.2	999	9.4
2019	11	28	0	0	0.26	2.22	2.17	167	9.4
2019	11	28	0	30	0.26	2.04	2.19	172	9.4
2019	11	28	1	0	0.32	2.56	2.37	176	9.4
2019	11	28	1	30	0.47	2.94	2.64	176	9.4
2019	11	28	2	0	0.52	2.94	2.72	190	9.4
2019	11	28	2	30	0.69	3.33	2.88	214	9.4
2019	11	28	3	0	0.87	3.57	3.23	229	9.4
2019	11	28	3	30	0.73	3.7	3.12	239	9.4
2019	11	28	4	0	0.52	3.45	2.86	243	9.4
2019	11	28	4	30	0.44	3.33	2.74	248	9.4
2019	11	28	5	0	0.37	2.94	2.62	250	9.4
2019	11	28	5	30	0.31	2.94	2.55	277	9.4
2019	11	28	6	0	0.31	2.5	2.41	263	9.4
2019	11	28	6	30	0.37	2.44	2.42	269	9.4
2019	11	28	7	0	0.46	2.56	2.54	273	9.4
2019	11	28	7	30	0.58	3.12	2.85	300	9.4
2019	11	28	8	0	0.58	3.23	2.94	304	9.4
2019	11	28	8	30	0.58	3.57	2.92	319	9.4
2019	11	28	9	0	0.76	3.85	3.24	318	9.4
2019	11	28	9	30	0.81	4	3.37	322	9.3
2019	11	28	10	0	1.03	4.55	3.69	329	9.3
2019	11	28	10	30	1.18	4.76	3.98	340	9.3
2019	11	28	11	0	1.12	4.76	3.79	338	9.3
2019	11	28	11	30	1.21	5	3.84	343	9.3
2019	11	28	12	0	1.26	4.76	3.87	340	9.3
2019	11	28	12	30	1.38	5.26	3.99	345	9.3
2019	11	28	13	0	1.42	4.55	3.95	335	9.3
2019	11	28	13	30	1.48	5	4.1	338	9.3
2019	11	28	14	0	1.56	5	4.19	339	9.3
2019	11	28	14	30	1.83	5.26	4.52	339	9.3
2019	11	28	15	0	1.99	5.88	4.8	342	9.3
2019	11	28	15	30	2.2	5.88	5.08	350	9.3
2019	11	28	16	0	2.43	6.67	5.22	350	9.3
2019	11	28	16	30	2.55	6.25	5.38	349	9.3
2019	11	28	17	0	2.47	7.14	5.4	4	9.3
2019	11	28	17	30	2.83	7.14	5.72	3	9.3
2019	11	28	18	0	3.06	7.69	6.2	1	9.3
2019	11	28	18	30	3	8.33	6.21	3	9.3
2019	11	28	19	0	3.22	8.33	6.47	3	9.3
2019	11	28	19	30	3.15	8.33	6.48	3	9.3
2019	11	28	20	0	3.36	8.33	6.67	1	9.3
2019	11	28	20	30	3.12	9.09	6.65	1	9.3
2019	11	28	21	0	3.15	8.33	6.6	3	9.3
2019	11	28	21	30	2.75	9.09	6.25	1	9.3
2019	11	28	22	0	2.69	8.33	6.13	1	9.3
2019	11	28	22	30	2.58	8.33	5.91	1	9.3
2019	11	28	23	0	2.59	8.33	5.91	3	9.2
2019	11	28	23	30	2.61	7.14	5.77	3	9.2
2019	11	29	0	0	2.69	7.14	5.84	359	9.2
2019	11	29	0	30	2.52	6.67	5.47	359	9.2
2019	11	29	1	0	2.49	6.67	5.54	1	9.2
2019	11	29	1	30	2.49	6.25	5.49	359	9.2
2019	11	29	2	0	2.54	6.67	5.45	357	9.2
2019	11	29	2	30	2.49	6.25	5.44	352	9.2
2019	11	29	3	30	2.55	6.67	5.51	357	9.2
2019	11	29	4	0	2.69	6.67	5.53	352	9.2
2019	11	29	4	30	2.55	6.67	5.63	354	9.2
2019	11	29	5	0	2.48	6.67	5.69	357	9.2
2019	11	29	5	30	2.35	7.14	5.6	359	9.2
2019	11	29	6	0	2.44	6.67	5.73	352	9.2
2019	11	29	6	30	2.35	6.67	5.53	354	9.2
2019	11	29	7	0	2.38	7.69	5.65	359	9.1
2019	11	29	7	30	2.37	7.14	5.76	354	9.1
2019	11	29	8	0	2.31	6.67	5.61	350	9.1
2019	11	29	8	30	2.33	6.67	5.64	352	8.9
2019	11	29	9	0	2.28	7.14	5.56	357	8.8
2019	11	29	9	30	2.25	7.14	5.69	359	8.8
2019	11	29	10	0	2.26	6.25	5.67	354	8.8
2019	11	29	10	30	2.12	7.14	5.37	356	8.8
2019	11	29	11	0	1.96	6.25	5.43	353	8.9
2019	11	29	11	30	1.87	6.67	5.18	354	8.9
2019	11	29	12	0	1.9	6.25	5.01	353	8.9
2019	11	29	12	30	1.74	6.25	4.92	353	8.9
2019	11	29	13	0	1.76	6.25	4.73	350	8.9
2019	11	29	13	30	1.68	5.88	4.67	347	8.9
2019	11	29	14	0	1.62	6.25	4.72	359	8.8
2019	11	29	14	30	1.69	5.88	4.72	352	8.8
2019	11	29	15	0	1.79	5.88	4.74	353	8.8
2019	11	29	15	30	1.67	5.26	4.7	345	8.8
2019	11	29	16	0	1.74	6.25	4.88	357	8.8
2019	11	29	16	30	1.76	6.25	4.8	357	8.8
2019	11	29	17	0	1.8	5.88	4.84	350	8.8
2019	11	29	17	30	1.59	5.88	4.67	354	8.8
2019	11	29	18	0	1.67	5.88	4.76	356	8.8
2019	11	29	18	30	1.54	4.76	4.65	338	8.8
2019	11	29	19	0	1.56	5.26	4.75	350	8.8
2019	11	29	19	30	1.54	5.26	4.73	350	8.8
2019	11	29	20	0	1.45	5.56	4.68	353	8.7
2019	11	29	20	30	1.47	5.26	4.66	350	8.7
2019	11	29	21	0	1.52	5.56	4.69	350	8.7
2019	11	29	21	30	1.53	5.88	4.75	352	8.7
2019	11	29	22	0	1.62	5.88	4.85	346	8.7
2019	11	29	22	30	1.62	5.88	4.86	345	8.7
2019	11	29	23	0	1.7	5.88	4.87	343	8.7
2019	11	29	23	30	1.79	5.88	4.84	339	8.7
2019	11	30	0	0	1.89	6.25	5.03	340	8.6
2019	11	30	0	30	1.87	5.88	4.9	347	8.6
2019	11	30	1	0	1.95	5.88	4.98	343	8.6
2019	11	30	1	30	2.08	6.25	5.19	347	8.6
2019	11	30	2	0	2.11	6.67	5.22	353	8.6
2019	11	30	2	30	1.99	6.25	5.11	349	8.6
2019	11	30	3	0	2.08	6.67	5.21	354	8.6
2019	11	30	3	30	2.05	6.67	5.16	349	8.6
2019	11	30	4	0	1.94	6.67	5.03	357	8.6
2019	11	30	4	30	2.08	6.67	5.21	354	8.6
2019	11	30	5	0	2.04	6.25	5.17	356	8.6
2019	11	30	5	30	1.77	6.67	4.91	1	8.6
2019	11	30	6	0	1.76	6.25	4.94	352	8.6
2019	11	30	6	30	1.79	5.88	4.97	349	8.7
2019	11	30	7	0	1.67	7.14	4.85	6	8.8
2019	11	30	7	30	1.66	7.14	4.82	6	8.8
2019	11	30	8	0	1.6	7.14	4.86	3	8.9
2019	11	30	8	30	1.56	6.67	4.74	3	8.8
2019	11	30	9	0	1.63	6.67	4.87	359	8.8
2019	11	30	9	30	1.6	6.25	4.77	353	8.7
2019	11	30	10	0	1.6	6.67	4.77	357	8.8
2019	11	30	10	30	1.63	6.67	4.83	1	8.8
2019	11	30	11	0	1.69	6.67	4.87	1	8.8
2019	11	30	11	30	1.6	6.25	4.79	356	8.7
2019	11	30	12	0	1.68	6.25	4.7	354	8.7
2019	11	30	12	30	1.65	6.25	4.55	356	8.7
2019	11	30	13	0	1.6	5.56	4.63	342	8.7
2019	11	30	13	30	1.52	5.88	4.48	349	8.8
2019	11	30	14	0	1.59	5.88	4.54	349	8.8
2019	11	30	14	30	1.68	5.56	4.56	343	8.8
2019	11	30	15	0	1.51	5.88	4.39	349	8.6
2019	11	30	15	30	1.56	5.88	4.5	347	8.5
2019	11	30	16	0	1.38	5.56	4.39	353	8.5
2019	11	30	16	30	1.42	5.88	4.35	356	8.4
2019	11	30	17	0	1.33	5.26	4.16	347	8.3
2019	11	30	17	30	1.37	5.26	4.36	349	8.3
2019	11	30	18	0	1.49	5.88	4.47	354	8.3
2019	11	30	18	30	1.32	5.88	4.22	356	8.3
2019	11	30	19	0	1.43	5.88	4.47	350	8.3
2019	11	30	19	30	1.42	6.25	4.43	0	8.3
2019	11	30	20	0	1.3	5.56	4.33	338	8.3
2019	11	30	20	30	1.32	5.56	4.46	342	8.3
2019	11	30	21	0	1.32	5.88	4.39	349	8.2
2019	11	30	21	30	1.34	5.88	4.48	349	8.2
2019	11	30	22	0	1.33	5.88	4.46	352	8.2
2019	11	30	22	30	1.41	5.26	4.47	345	8.1
2019	11	30	23	0	1.28	5.88	4.33	347	8.4
2019	11	30	23	30	1.34	5.88	4.42	349	8.4
2019	12	1	0	0	1.46	5.56	4.46	342	8.5
2019	12	1	0	30	1.58	5.88	4.6	349	8.5
2019	12	1	1	0	1.49	5.88	4.48	347	8.5
2019	12	1	1	30	1.45	5.88	4.48	345	8.5
2019	12	1	2	0	1.47	5.56	4.37	350	8.5
2019	12	1	2	30	1.42	5.56	4.29	345	8.5
2019	12	1	3	0	1.38	5.88	4.37	353	8.4
2019	12	1	3	30	1.29	5.88	4.34	354	8.2
2019	12	1	4	0	1.32	5.56	4.34	353	8.1
2019	12	1	4	30	1.3	5.56	4.32	356	8.1
2019	12	1	5	0	1.13	5.88	4.32	359	8.1
2019	12	1	5	30	1.05	5.56	4.11	357	8.1
2019	12	1	6	0	0.95	5.88	4.12	1	8.2
2019	12	1	6	30	0.94	5.26	4.18	353	8.3
2019	12	1	7	0	0.87	5.88	4.28	6	8.4
2019	12	1	7	30	0.88	6.25	4.32	7	8.5
2019	12	1	8	0	0.79	5.56	4.17	0	8.5
2019	12	1	8	30	0.85	6.25	4.45	3	8.4
2019	12	1	9	0	0.79	5.88	4.21	1	8.5
2019	12	1	9	30	0.75	5.88	4.15	4	8.5
2019	12	1	10	0	0.71	5.88	4.2	1	8.1
2019	12	1	10	30	0.65	5.88	4.06	1	8.1
2019	12	1	11	0	0.64	6.25	4.08	6	8.2
2019	12	1	11	30	0.62	5.56	3.99	4	8.2
2019	12	1	12	0	0.61	5.56	3.79	4	8.2
2019	12	1	12	30	0.6	5.26	3.63	4	8.2
2019	12	1	13	0	0.57	5.56	3.64	7	8.1
2019	12	1	13	30	0.55	5.26	3.54	7	8.2
2019	12	1	14	0	0.52	5.26	3.49	1	8.2
2019	12	1	14	30	0.53	4.76	3.59	6	8.2
2019	12	1	15	0	0.46	4.76	3.46	1	8.1
2019	12	1	15	30	0.46	5	3.4	0	8.1
2019	12	1	16	0	0.42	4.55	3.41	3	8.1
2019	12	1	16	30	0.39	4.55	3.26	359	8.2
2019	12	1	17	0	0.36	3.85	3.13	359	8.4
2019	12	1	17	30	0.35	3.33	2.96	353	8.5
2019	12	1	18	0	0.36	4.55	3	0	8.5
2019	12	1	18	30	0.35	5.56	3.03	6	8.5
2019	12	1	19	0	0.34	2.17	2.94	62	8.5
2019	12	1	19	30	0.34	5	2.97	0	8.5
2019	12	1	20	0	0.31	5	3	359	8.5
2019	12	1	20	30	0.3	4	3.08	354	8.5
2019	12	1	21	0	0.29	5.56	3.19	356	8.5
2019	12	1	21	30	0.28	5.26	3.15	357	8.5
2019	12	1	22	0	0.31	5.56	2.99	0	8.3
2019	12	1	22	30	0.4	5.56	2.75	357	8.2
2019	12	1	23	0	0.49	2.63	2.84	82	8.1
2019	12	1	23	30	0.57	2.94	2.87	87	8.1
2019	12	2	0	0	0.59	3.03	2.99	87	8.1
2019	12	2	0	30	0.61	3.03	3	91	8.1
2019	12	2	1	0	0.62	3.45	2.99	80	8
2019	12	2	1	30	0.72	3.57	3.09	75	8
2019	12	2	2	0	0.77	3.57	3.07	86	7.9
2019	12	2	2	30	0.96	3.7	3.32	84	7.9
2019	12	2	3	0	0.98	4	3.42	91	7.9
2019	12	2	3	30	1.14	4.35	3.61	84	7.9
2019	12	2	4	0	1.19	4.55	3.68	73	7.9
2019	12	2	4	30	1.39	4.35	3.91	75	7.9
2019	12	2	5	0	1.34	4.55	3.91	70	8.1
2019	12	2	5	30	1.43	4.76	4.03	62	8.1
2019	12	2	6	0	1.47	4.76	3.99	62	8.1
2019	12	2	6	30	1.4	4.76	3.99	59	8.1
2019	12	2	7	0	1.7	5	4.26	55	8.2
2019	12	2	7	30	1.83	4.76	4.36	56	8.2
2019	12	2	8	0	1.81	5	4.5	61	8.2
2019	12	2	8	30	1.8	5.26	4.48	56	8.1
2019	12	2	9	0	1.94	5.26	4.64	56	8.1
2019	12	2	9	30	1.95	5.26	4.65	65	8
2019	12	2	10	0	2.2	5.56	4.77	59	8
2019	12	2	10	30	2.03	5.26	4.76	63	7.9
2019	12	2	11	0	1.89	5.26	4.59	51	7.9
2019	12	2	11	30	1.78	5.26	4.56	59	7.9
2019	12	2	12	0	1.77	5	4.51	63	7.9
2019	12	2	12	30	1.63	5	4.37	59	7.9
2019	12	2	13	0	1.72	4.76	4.43	61	7.9
2019	12	2	13	30	1.64	5.26	4.35	46	7.9
2019	12	2	14	0	1.59	5	4.36	54	7.9
2019	12	2	14	30	1.72	5.26	4.49	45	7.9
2019	12	2	15	0	1.77	5	4.46	51	7.9
2019	12	2	15	30	1.7	5.26	4.42	48	7.9
2019	12	2	16	0	1.77	5.26	4.5	51	7.9
2019	12	2	16	30	1.83	5.26	4.53	39	7.9
2019	12	2	17	0	1.7	5	4.49	44	7.9
2019	12	2	17	30	1.73	5	4.61	41	7.9
2019	12	2	18	0	1.9	5.26	4.66	41	7.9
2019	12	2	18	30	1.91	5	4.74	44	7.9
2019	12	2	19	0	1.92	5.26	4.79	44	7.9
2019	12	2	19	30	1.89	5.26	4.79	41	7.9
2019	12	2	20	0	1.99	5.56	4.96	24	7.9
2019	12	2	20	30	1.93	5	4.84	35	7.9
2019	12	2	21	0	1.99	5.56	4.98	24	7.9
2019	12	2	21	30	2.05	6.25	5.1	10	7.9
2019	12	2	22	0	2.03	6.25	5.15	7	7.9
2019	12	2	22	30	2.18	5.56	5.32	28	7.9
2019	12	2	23	0	2.28	6.25	5.38	13	7.9
2019	12	2	23	30	2.32	6.25	5.4	10	7.9
2019	12	3	0	0	2.29	5.56	5.31	30	7.7
2019	12	3	0	30	2.15	5.88	5.39	18	7.7
2019	12	3	1	0	2.31	6.25	5.38	6	7.7
2019	12	3	1	30	2.27	5.56	5.28	16	7.8
2019	12	3	2	0	2.32	5.88	5.27	13	7.8
2019	12	3	2	30	2.4	6.25	5.44	9	7.8
2019	12	3	3	0	2.52	7.14	5.53	4	7.9
2019	12	3	3	30	2.38	6.25	5.45	13	7.9
2019	12	3	4	0	2.52	7.14	5.52	3	7.8
2019	12	3	4	30	2.48	7.14	5.58	357	7.8
2019	12	3	5	0	2.49	6.67	5.52	6	7.8
2019	12	3	5	30	2.55	6.67	5.48	6	7.8
2019	12	3	6	0	2.5	5.26	5.53	34	7.8
2019	12	3	6	30	2.5	6.25	5.55	6	7.8
2019	12	3	7	0	2.61	6.67	5.62	4	7.8
2019	12	3	7	30	2.63	7.14	5.54	1	7.8
2019	12	3	8	0	2.68	7.69	5.8	3	7.8
2019	12	3	8	30	2.78	6.67	5.88	359	7.8
2019	12	3	9	0	2.71	7.14	5.98	1	7.8
2019	12	3	9	30	2.7	8.33	6.02	1	7.8
2019	12	3	10	0	2.78	7.69	5.99	0	7.8
2019	12	3	10	30	2.74	6.67	6.01	357	7.7
2019	12	3	11	0	2.96	7.14	6.2	354	7.7
2019	12	3	11	30	2.8	7.14	6.13	0	7.7
2019	12	3	12	0	2.8	8.33	6.2	359	7.7
2019	12	3	12	30	2.77	8.33	6.15	3	7.8
2019	12	3	13	0	2.73	7.69	6.21	354	7.8
2019	12	3	13	30	2.74	8.33	6.26	0	7.7
2019	12	3	14	30	2.57	7.69	6	356	7.8
2019	12	3	15	0	2.45	7.69	5.9	0	7.7
2019	12	3	15	30	2.63	7.14	5.9	356	7.7
2019	12	3	16	0	2.41	6.67	5.66	356	7.7
2019	12	3	16	30	2.25	6.67	5.55	357	7.7
2019	12	3	17	0	2.36	6.67	5.67	354	7.7
2019	12	3	17	30	2.11	5.88	5.39	349	7.7
2019	12	3	18	0	1.95	6.67	5.31	3	7.7
2019	12	3	18	30	2.03	7.14	5.31	0	7.7
2019	12	3	19	0	1.96	6.67	5.34	1	7.7
2019	12	3	19	30	1.95	6.25	5.31	356	7.8
2019	12	3	20	0	1.84	6.25	5.2	356	7.8
2019	12	3	21	0	1.98	6.67	5.2	3	7.8
2019	12	3	21	30	2.02	6.25	5.42	354	7.8
2019	12	3	22	0	2.05 1	1.76	5.53	359	7.9
2019	12	3	22	30	2.03	6.67	5.42	359	7.9
2019	12	3	23	0	2.03	7.14	5.45	3	8
2019	12	3	23	30	1.97	6.67	5.36	357	8
2019	12	4	0	0	1.98	6.67	5.29	356	8
2019	12	4	0	30	1.91	6.67	5.45	354	8
2019	12	4	1	0	1.91	5.88	5.38	342	8
2019	12	4	1	30	1.96	6.25	5.49	349	8
2019	12	4	2	0	1.91	6.25	5.35	347	8
2019	12	4	2	30	1.67	6.67	5.26	359	8
2019	12	4	3	0	1.66	6.67	5.13	357	8.1
2019	12	4	3	30	1.57	6.25	5.08	354	8.1
2019	12	4	4	0	1.51	6.67	4.94	4	8.1
2019	12	4	5	0	1.24	6.25	4.4	354	8.1
2019	12	4	5	30	1.09	5.88	4.33	354	7.8
2019	12	4	6	0	1.1	6.25	4.17	3	7.3
2019	12	4	6	30	1.15	5.56	4.24	1	7.1
2019	12	4	7	0	1.07	5.26	4.07	356	7
2019	12	4	7	30	1.05	6.25	3.96	359	6.9
2019	12	4	8	0	1.06	5.56	3.93	0	6.8
2019	12	4	8	30	1.01	5.88	3.94	1	6.8
2019	12	4	9	0	0.99	5.56	3.98	1	6.8
2019	12	4	9	30	0.94	5.56	3.94	359	6.8
2019	12	4	10	0	0.9	5.26	3.94	4	6.9
2019	12	4	10	30	0.85	5.56	3.95	0	6.9
2019	12	4	11	0	0.84	5.56	4.06	3	6.9
2019	12	4	11	30	0.75	5.56	3.86	6	6.9
2019	12	4	12	0	0.79	5	3.86	1	6.9
2019	12	4	13	0	0.7	5.56	3.81	6	6.9
2019	12	4	13	30	0.65	5.56	3.85	3	6.9
2019	12	4	14	0	0.6	5.56	3.78	4	6.9
2019	12	4	14	30	0.58	5.56	3.62	4	6.9
2019	12	4	15	0	0.55	4.76	3.36	7	6.9
2019	12	4	15	30	0.54	5.26	3.32	7	6.9
2019	12	4	16	0	0.53	5.26	3.24	7	6.9
2019	12	4	16	30	0.5	4.76	3.14	9	6.9
2019	12	4	17	0	0.44	4.35	3.11	3	6.9
2019	12	4	17	30	0.43	4.55	3.08	7	6.9
2019	12	4	18	0	0.4	2.33	2.86	271	6.9
2019	12	4	18	30	0.41	2.44	2.74	266	6.9
2019	12	4	19	0	0.37	2.5	2.66	283	6.9
2019	12	4	19	30	0.31	2.27	2.65	263	6.8
2019	12	4	20	0	0.26	2.17	2.64	267	6.7
2019	12	4	20	30	0.24 9	9	2.68	999	6.7
2019	12	4	21	0	9.00 9	9.00 9	9	999	6.8
2019	12	4	21	30	0.21 9	9	2.62	999	6.8
2019	12	4	22	0	9.00 9	9.00 9	9	999	6.8
2019	12	4	22	30	9.00 9	9.00 9	9	999	6.8
2019	12	4	23	0	0.20 9	9	2.45	999	6.8
2019	12	4	23	30	0.21 9	9	2.46	999	6.7
2019	12	5	0	0	0.21 9	9	2.49	999	6.7
2019	12	5	0	30	0.22 9	9	2.43	999	6.7
2019	12	5	1	0	0.19 9	9	2.42	999	6.7
2019	12	5	1	30	0.21 9	9	2.29	999	6.7
2019	12	5	2	0	0.25	2.27	2.26	273	6.7
2019	12	5	2	30	0.32	2.38	2.36	269	6.7
2019	12	5	3	0	0.33	2.63	2.44	264	6.7
2019	12	5	3	30	0.28	2.5	2.39	274	6.7
2019	12	5	4	0	0.3	2.38	2.34	280	6.7
2019	12	5	4	30	0.33	2.44	2.35	290	6.7
2019	12	5	5	0	0.45	2.78	2.52	304	6.7
2019	12	5	5	30	0.44	2.86	2.58	297	6.8
2019	12	5	6	0	0.38	2.7	2.51	305	6.8
2019	12	5	7	0	0.32	2.38	2.35	295	7
2019	12	5	7	30	0.41	2.7	2.42	318	7.2
2019	12	5	8	0	0.52	3.03	2.68	304	7.2
2019	12	5	8	30	0.51	2.86	2.67	298	7.2
2019	12	5	9	0	0.45	3.03	2.66	316	7.4
2019	12	5	9	30	0.49	2.86	2.68	302	8.3
2019	12	5	10	0	0.53	2.86	2.77	307	8.3
2019	12	5	10	30	0.5	3.23	2.72	331	8.3
2019	12	5	11	0	0.52	3.33	2.74	332	8.3
2019	12	5	11	30	0.55	2.78	2.73	290	8.3
2019	12	5	12	0	0.6	3.33	2.82	326	8.3
2019	12	5	12	30	0.63	3.12	2.9	309	8.3
2019	12	5	13	0	0.62	3.12	2.92	305	8.3
2019	12	5	13	30	0.58	3.23	2.87	309	8.3
2019	12	5	14	0	0.61	3.45	2.89	325	7.8
2019	12	5	14	30	0.61	3.45	2.96	325	7.5
2019	12	5	15	0	0.6	3.45	3.01	329	7.5
2019	12	5	15	30	0.64	3.57	2.99	331	7.4
2019	12	5	16	0	0.64	3.45	2.99	326	7.4
2019	12	5	16	30	0.68	3.57	3.03	328	7.4
2019	12	5	17	0	0.69	3.7	3.02	326	7.5
2019	12	5	17	30	0.75	3.7	3.06	321	7.5
2019	12	5	18	0	0.8	3.85	3.19	329	7.5
2019	12	5	18	30	0.81	3.57	3.17	314	7.5
2019	12	5	19	0	0.75	3.57	3.18	322	7.5
2019	12	5	19	30	0.75	3.7	3.14	329	7.7
2019	12	5	20	0	0.74	3.85	3.13	335	7.8
2019	12	5	20	30	0.7	3.85	3.15	335	8
2019	12	5	21	0	0.77	4	3.16	338	8
2019	12	5	21	30	0.79	3.85	3.26	332	8.1
2019	12	5	22	0	0.76	3.33	3.16	324	8.2
2019	12	5	22	30	0.76	4	3.12	335	8.2
2019	12	5	23	0	0.84	4.35	3.15	340	8.2
2019	12	5	23	30	0.95	4.35	3.37	339	8.2
2019	12	6	0	0	1.01	4	3.46	324	8.2
2019	12	6	0	30	1.01	4	3.52	325	8.2
2019	12	6	1	0	1.17	3.85	3.61	298	8.1
2019	12	6	1	30	1.18	4	3.66	288	8.1
2019	12	6	2	0	1.16	3.85	3.74	283	8
2019	12	6	2	30	1.09	4.17	3.68	315	7.9
2019	12	6	3	0	1.04	4.35	3.67	325	7.8
2019	12	6	3	30	1.04	4.76	3.63	335	7.8
2019	12	6	4	0	1.05	4.76	3.7	335	7.5
2019	12	6	4	30	1.02	4.76	3.64	335	7.4
2019	12	6	5	0	1.01	4.55	3.72	338	7.4
2019	12	6	5	30	1	5	3.66	339	7.4
2019	12	6	6	0	1.09	4.76	3.74	338	7.4
2019	12	6	6	30	1.13	4.76	3.79	339	7.5
2019	12	6	7	0	1.07	5	3.82	340	7.5
2019	12	6	7	30	1.13	5.26	3.86	342	7.6
2019	12	6	8	0	1.1	5	3.85	342	7.7
2019	12	6	8	30	1.02	4.76	3.78	343	8
2019	12	6	9	0	0.99	5.26	3.86	346	8.1
2019	12	6	9	30	0.95	5	3.69	347	8.1
2019	12	6	10	0	0.95	5.56	3.57	353	8.1
2019	12	6	10	30	0.9	5	3.44	349	8.1
2019	12	6	11	0	0.94	3.23	3.38	300	8
2019	12	6	11	30	0.99	4.55	3.46	342	8
2019	12	6	12	0	1	3.7	3.53	297	8
2019	12	6	12	30	0.95	4.76	3.56	343	8
2019	12	6	13	0	0.88	4.35	3.38	342	8
2019	12	6	13	30	0.79	4.55	3.36	346	8
2019	12	6	14	0	0.75	3.03	3.2	270	8
2019	12	6	14	30	0.73	3.12	3.21	276	8
2019	12	6	15	0	0.66	3.12	3.1	270	8
2019	12	6	15	30	0.63	3.12	3.05	270	8
2019	12	6	16	0	0.56	2.94	3	262	8
2019	12	6	16	30	0.52	2.7	2.92	259	8
2019	12	6	17	0	0.48	2.78	2.87	262	7.4
2019	12	6	17	30	0.49	2.7	2.76	264	7.3
2019	12	6	18	0	0.44	2.86	2.72	260	7.3
2019	12	6	18	30	0.39	2.7	2.66	262	7.3
2019	12	6	19	0	0.33	2.44	2.58	253	7.3
2019	12	6	19	30	0.25	2.33	2.55	266	7.2
2019	12	6	20	0	0.25	2.17	2.35	231	7.2
2019	12	6	20	30	0.29	2.08	2.26	235	7.3
2019	12	6	21	0	0.25	2.33	2.26	218	7.5
2019	12	6	21	30	0.22 9	9	2.2	999	8
2019	12	6	22	0	0.21 9	9	2.12	999	8
2019	12	6	22	30	0.21 9	9	2.12	999	8
2019	12	6	23	0	0.24 9	9	2.2	999	8
2019	12	6	23	30	0.33	2.27	2.19	196	8
2019	12	7	0	0	0.55	2.86	2.68	224	8
2019	12	7	0	30	0.7	3.33	2.94	229	8
2019	12	7	1	0	0.62	3.33	2.92	236	8
2019	12	7	1	30	0.54	3.12	2.75	246	8
2019	12	7	2	0	0.63	2.94	2.81	249	8
2019	12	7	2	30	0.63	3.23	2.86	259	8
2019	12	7	3	0	0.62	3.12	2.85	257	8
2019	12	7	3	30	0.68	3.23	2.91	273	7.9
2019	12	7	4	0	0.9	3.7	3.25	295	7.9
2019	12	7	4	30	1.08	4.35	3.54	304	7.9
2019	12	7	5	0	1.12	4.55	3.73	314	7.9
2019	12	7	5	30	1.2	4.55	3.85	319	7.8
2019	12	7	6	0	1.32	4.76	4.09	329	7.8
2019	12	7	6	30	1.59	5	4.37	335	7.8
2019	12	7	7	0	1.71	5.88	4.63	338	7.8
2019	12	7	7	30	1.78	5.88	4.66	339	7.8
2019	12	7	8	0	1.62	5.88	4.45	340	7.9
2019	12	7	8	30	1.72	5.56	4.52	342	7.9
2019	12	7	9	0	1.65	5.56	4.55	339	7.9
2019	12	7	9	30	1.86	6.25	4.85	345	7.9
2019	12	7	10	0	1.93	6.25	5.05	349	7.9
2019	12	7	10	30	2	6.67	5.17	354	7.9
2019	12	7	11	0	1.85	5.88	4.89	350	7.9
2019	12	7	11	30	1.79	6.25	4.91	347	7.9
2019	12	7	12	0	1.76	6.25	4.79	346	7.9
2019	12	7	12	30	1.74	5.88	4.75	343	7.9
2019	12	7	13	0	1.69	6.25	4.82	343	7.9
2019	12	7	13	30	1.62	6.25	4.82	343	7.9
2019	12	7	14	0	1.57	5.88	4.7	345	7.9
2019	12	7	14	30	1.46	6.25	4.76	347	7.9
2019	12	7	15	0	1.46	5.88	4.67	345	7.9
2019	12	7	15	30	1.36	5.88	4.53	352	7.9
2019	12	7	16	0	1.28	5.56	4.45	350	7.9
2019	12	7	16	30	1.19	5.56	4.4	349	7.9
2019	12	7	17	0	1.11	5.88	4.21	353	7.9
2019	12	7	17	30	1.05	5.56	4.13	356	7.8
2019	12	7	18	0	0.99	5.56	4.04	353	7.8
2019	12	7	18	30	0.89	5.26	3.95	354	7.8
2019	12	7	19	0	0.82	5.26	3.88	357	7.8
2019	12	7	19	30	0.74	5	3.66	0	7.8
2019	12	7	20	0	0.69	4.55	3.6	350	7.8
2019	12	7	20	30	0.65	5	3.58	359	7.8
2019	12	7	21	0	0.65	4.76	3.59	354	7.8
2019	12	7	21	30	0.6	4.35	3.25	352	7.8
2019	12	7	22	0	0.63	4.35	3.21	356	7.8
2019	12	7	22	30	0.64	4.35	3.14	359	7.8
2019	12	7	23	0	0.67	4.55	3.12	359	7.9
2019	12	7	23	30	0.72	4.35	3.2	0	7.9
2019	12	8	0	0	0.77	4.17	3.31	352	7.9
2019	12	8	0	30	0.77	3.85	3.3	342	7.9
2019	12	8	1	0	0.82	4.17	3.44	342	7.9
2019	12	8	1	30	0.89	4.55	3.55	352	7.9
2019	12	8	2	0	0.89	4.35	3.58	340	7.9
2019	12	8	2	30	1.04	5	3.85	350	7.8
2019	12	8	3	0	1.1	4.76	3.93	343	7.8
2019	12	8	3	30	1.25	5	4.15	349	7.8
2019	12	8	4	0	1.16	5.56	4.1	347	7.8
2019	12	8	4	30	1.22	5.26	4.31	350	7.8
2019	12	8	5	0	1.14	5.26	4.2	353	7.7
2019	12	8	5	30	1.13	5.56	4.3	354	7.7
2019	12	8	6	0	1.16	5.26	4.2	354	7.7
2019	12	8	6	30	1.07	5.56	4.14	1	7.7
2019	12	8	7	0	1.08	5.26	4.09	0	7.7
2019	12	8	7	30	0.91	5.56	3.9	1	7.7
2019	12	8	8	0	0.97	5	4	357	7.7
2019	12	8	8	30	0.94	5	3.94	357	7.7
2019	12	8	9	0	0.89	5.26	3.75	1	7.7
2019	12	8	9	30	0.85	5	3.74	3	7.7
2019	12	8	10	0	0.8	5.26	3.7	3	7.7
2019	12	8	10	30	0.74	4.55	3.6	356	7.7
2019	12	8	11	0	0.67	5	3.66	1	7.7
2019	12	8	11	30	0.63	5	3.59	3	7.7
2019	12	8	12	0	0.58	4.76	3.55	0	7.7
2019	12	8	12	30	0.59	4.76	3.64	1	7.7
2019	12	8	13	0	0.57	4.76	3.6	3	7.7
2019	12	8	13	30	0.54	5	3.58	359	7.7
2019	12	8	14	0	0.47	4.76	3.43	357	7.7
2019	12	8	14	30	0.48	5	3.58	1	7.7
2019	12	8	15	0	0.41	4.76	3.52	359	7.7
2019	12	8	15	30	0.35	4.55	3.34	359	7.7
2019	12	8	16	0	0.34	4.55	3.42	0	7.7
2019	12	8	16	30	0.28	4.76	3.3	0	7.7
2019	12	8	17	0	0.27	4.55	3.46	359	7.7
2019	12	8	17	30	0.23 9	9	3.37	999	7.7
2019	12	8	18	0	9.00 9	9.00 9	9	999	7.7
2019	12	8	18	30	0.33	2.27	2.37	176	7.7
2019	12	8	19	0	0.32	2.33	2.4	176	7.6
2019	12	8	19	30	0.35	2.44	2.36	187	7.6
2019	12	8	20	0	0.42	2.56	2.43	205	7.6
2019	12	8	20	30	0.47	2.7	2.53	211	7.6
2019	12	8	21	0	0.45	2.7	2.58	214	7.7
2019	12	8	21	30	0.46	2.86	2.54	214	7.7
2019	12	8	22	0	0.45	2.78	2.53	211	7.7
2019	12	8	22	30	0.42	2.7	2.52	208	7.7
2019	12	8	23	0	0.43	2.78	2.51	201	7.7
2019	12	8	23	30	0.42	2.7	2.47	191	7.7
2019	12	9	0	0	0.45	2.94	2.58	187	7.7
2019	12	9	0	30	0.49	2.78	2.63	187	7.7
2019	12	9	1	0	0.51	2.86	2.63	180	7.7
2019	12	9	1	30	0.51	2.94	2.67	176	7.7
2019	12	9	2	0	0.53	2.94	2.67	173	7.7
2019	12	9	2	30	0.51	3.03	2.66	176	7.7
2019	12	9	3	0	0.54	2.86	2.67	173	7.7
2019	12	9	3	30	0.56	3.03	2.66	167	7.7
2019	12	9	4	0	0.58	3.12	2.74	170	7.7
2019	12	9	4	30	0.6	3.12	2.73	176	7.7
2019	12	9	5	0	0.58	3.03	2.73	183	7.6
2019	12	9	5	30	0.61	3.12	2.79	180	7.6
2019	12	9	6	30	0.54	3.03	2.68	189	7.6
2019	12	9	7	0	0.54	2.94	2.73	191	7.6
2019	12	9	7	30	0.46	2.78	2.61	201	7.6
2019	12	9	8	0	0.38	2.56	2.43	197	7.6
2019	12	9	8	30	0.4	2.56	2.42	186	7.6
2019	12	9	9	0	0.39	2.56	2.47	180	7.6
2019	12	9	9	30	0.33	2.7	2.41	174	7.6
2019	12	9	10	0	0.32	2.56	2.39	173	7.6
2019	12	9	10	30	0.29	2.38	2.31	169	7.7
2019	12	9	11	0	0.3	2.38	2.32	180	7.7
2019	12	9	11	30	0.28	2.44	2.29	169	7.7
2019	12	9	12	0	0.29	2.5	2.32	172	7.7
2019	12	9	12	30	0.3	2.44	2.32	173	7.7
2019	12	9	13	0	0.34	2.44	2.37	172	7.7
2019	12	9	13	30	0.38	2.5	2.47	179	7.6
2019	12	9	14	0	0.34	2.56	2.43	177	7.6
2019	12	9	14	30	0.25	2.33	2.28	181	7.6
2019	12	9	15	0	0.24 9	9	2.15	999	7.6
2019	12	9	15	30	0.3	2.13	2.12	169	7.6
2019	12	9	16	0	0.5	2.5	2.5	166	7.7
2019	12	9	16	30	0.69	3.45	2.91	169	7.7
2019	12	9	17	0	0.78	3.7	3.08	167	7.7
2019	12	9	17	30	0.77	3.33	3.04	169	7.7
2019	12	9	18	0	0.76	3.23	2.93	172	7.7
2019	12	9	18	30	0.89	3.57	3.14	172	7.7
2019	12	9	19	0	0.87	3.57	3.18	174	7.7
2019	12	9	19	30	0.84	3.57	3.17	170	7.7
2019	12	9	20	0	0.74	3.57	3.08	172	7.7
2019	12	9	20	30	0.66	3.33	2.89	158	7.7
2019	12	9	21	0	0.67	3.33	2.92	163	7.7
2019	12	9	21	30	0.71	3.45	3.02	162	7.7
2019	12	9	22	0	0.81	3.45	3.11	162	7.7
2019	12	9	22	30	0.85	3.85	3.26	169	7.7
2019	12	9	23	0	0.94	4.17	3.45	169	7.7
2019	12	9	23	30	0.92	3.85	3.38	181	7.6
2019	12	10	0	0	0.92	3.85	3.38	179	7.6
2019	12	10	0	30	0.83	3.45	3.26	190	7.4
2019	12	10	1	0	0.69	3.45	3.04	181	7.4
2019	12	10	1	30	0.6	3.03	2.89	197	7.4
2019	12	10	2	0	0.6	3.03	2.76	204	7.5
2019	12	10	2	30	0.67	3.03	2.8	201	7.5
2019	12	10	3	0	0.78	3.33	3.01	203	7.5
2019	12	10	3	30	0.8	3.57	3.06	201	7.5
2019	12	10	4	0	1.01	3.7	3.33	201	7.6
2019	12	10	4	30	1.09	4.17	3.5	207	7.6
2019	12	10	5	0	1.11	4	3.54	208	7.6
2019	12	10	5	30	1.06	3.85	3.46	211	7.6
2019	12	10	6	0	1.2	4	3.59	217	7.6
2019	12	10	6	30	1.23	4.17	3.69	228	7.6
2019	12	10	7	0	1.18	4.35	3.63	235	7.6
2019	12	10	7	30	1.07	4	3.52	236	7.5
2019	12	10	8	0	1.16	4	3.6	232	7.5
2019	12	10	8	30	1.1	4.17	3.63	235	7.6
2019	12	10	9	0	1.18	4.55	3.72	239	7.6
2019	12	10	9	30	1.09	4.55	3.67	236	7.6
2019	12	10	10	0	1.16	4.17	3.72	234	7.7
2019	12	10	10	30	1.1	4.17	3.71	232	7.7
2019	12	10	11	0	1.01	4.35	3.56	232	7.7
2019	12	10	11	30	0.83	4	3.37	236	7.7
2019	12	10	12	0	0.87	4	3.33	239	7.7
2019	12	10	12	30	0.83	3.85	3.32	236	7.7
2019	12	10	13	0	0.78	3.7	3.25	239	7.7
2019	12	10	13	30	0.7	3.57	3.15	236	7.7
2019	12	10	14	0	0.76	3.7	3.16	238	7.6
2019	12	10	14	30	0.8	4	3.25	239	7.6
2019	12	10	15	0	0.77	3.57	3.23	236	7.6
2019	12	10	15	30	0.78	3.7	3.24	242	7.6
2019	12	10	16	0	0.81	3.7	3.23	242	7.6
2019	12	10	16	30	0.85	3.85	3.3	242	7.6
2019	12	10	17	0	0.81	3.7	3.27	236	7.7
2019	12	10	17	30	0.82	3.57	3.18	239	7.7
2019	12	10	18	0	0.94	3.85	3.33	236	7.7
2019	12	10	18	30	0.89	3.85	3.33	241	7.7
2019	12	10	19	0	0.91	4	3.35	242	7.7
2019	12	10	19	30	0.85	4	3.31	245	7.7
2019	12	10	20	0	0.84	3.7	3.28	239	7.7
2019	12	10	20	30	0.75	3.85	3.17	243	7.8
2019	12	10	21	0	0.6	3.45	3.01	236	7.8
2019	12	10	21	30	0.54	3.12	2.85	232	7.8
2019	12	10	22	0	0.51	2.94	2.85	239	7.7
2019	12	10	22	30	0.52	3.03	2.83	239	7.7
2019	12	10	23	0	0.52	3.33	2.88	241	7.7
2019	12	10	23	30	0.55	3.23	2.94	239	7.6
2019	12	11	0	0	0.45	3.12	2.83	238	7.6
2019	12	11	0	30	0.44	3.12	2.8	245	7.6
2019	12	11	1	0	0.4	3.12	2.76	246	7.6
2019	12	11	1	30	0.39	2.78	2.7	238	7.6
2019	12	11	2	0	0.38	2.7	2.77	241	7.7
2019	12	11	2	30	0.32	2.7	2.77	242	7.6
2019	12	11	3	0	0.37	2.5	2.45	273	7.6
2019	12	11	3	30	0.43	2.56	2.67	315	7.6
2019	12	11	4	0	0.44	3.03	2.87	316	7.6
2019	12	11	4	30	0.54	3.12	2.91	322	7.6
2019	12	11	5	0	0.63	3.7	3.24	326	7.6
2019	12	11	5	30	0.66	4	3.34	333	7.6
2019	12	11	6	0	0.64	4.17	3.35	338	7.6
2019	12	11	6	30	0.59	3.85	3.2	336	7.6
2019	12	11	7	0	0.68	4	3.25	336	7.6
2019	12	11	7	30	0.9	4	3.61	340	7.6
2019	12	11	8	0	0.97	4.35	3.8	345	7.6
2019	12	11	8	30	0.91	4.55	3.75	345	7.7
2019	12	11	9	0	0.93	4.35	3.6	342	7.7
2019	12	11	9	30	1.02	4.55	3.62	340	7.7
2019	12	11	10	0	1.18	4.55	3.74	343	7.6
2019	12	11	10	30	1.46	5	4.18	339	7.6
2019	12	11	11	0	1.49	5	4.22	339	7.6
2019	12	11	11	30	1.78	5.88	4.63	357	7.5
2019	12	11	12	0	1.8	5.88	4.84	353	7.5
2019	12	11	12	30	1.77	6.25	4.82	352	7.5
2019	12	11	13	0	1.67	5.88	4.7	349	7.5
2019	12	11	13	30	1.53	5.88	4.53	353	7.5
2019	12	11	14	0	1.35	5.88	4.33	352	7.5
2019	12	11	14	30	1.26	5.26	4.29	347	7.4
2019	12	11	15	0	1.15	5.26	4.32	350	7.4
2019	12	11	15	30	0.99	5	4.07	349	7.4
2019	12	11	16	0	0.91	5.26	3.96	350	7.4
2019	12	11	16	30	0.9	4.76	3.86	343	7.4
2019	12	11	17	0	0.83	4.76	3.72	345	7.4
2019	12	11	17	30	0.84	4.55	3.62	345	7.5
2019	12	11	18	0	0.75	4.17	3.61	343	7.5
2019	12	11	18	30	0.62	4.55	3.57	352	7.5
2019	12	11	19	0	0.56	4.55	3.53	353	7.5
2019	12	11	19	30	0.48	3.85	3.41	345	7.5
2019	12	11	20	0	0.43	4.17	3.37	353	7.5
2019	12	11	20	30	0.38	3.7	3.2	347	7.6
2019	12	11	21	0	0.37	3.85	2.99	349	7.6
2019	12	11	21	30	0.35	3.7	2.78	345	7.6
2019	12	11	22	0	0.38	3.7	2.72	354	7.6
2019	12	11	22	30	0.39	2.17	2.62	274	7.6
2019	12	11	23	0	0.43	2.33	2.59	274	7.6
2019	12	11	23	30	0.48	2.5	2.6	281	7.5
2019	12	12	0	0	0.48	2.7	2.64	283	7.5
2019	12	12	0	30	0.53	2.78	2.66	281	7.4
2019	12	12	1	0	0.55	2.86	2.71	269	7.4
2019	12	12	1	30	0.58	2.94	2.77	277	7.4
2019	12	12	2	0	0.53	2.78	2.75	269	7.4
2019	12	12	2	30	0.52	2.86	2.7	264	7.4
2019	12	12	3	0	0.48	2.63	2.67	263	7.4
2019	12	12	3	30	0.48	2.7	2.68	263	7.4
2019	12	12	4	0	0.54	2.78	2.69	264	7.3
2019	12	12	4	30	0.61	2.94	2.77	264	7.3
2019	12	12	5	0	0.69	3.12	2.92	273	7.3
2019	12	12	5	30	0.82	3.57	3.1	301	7.3
2019	12	12	6	0	0.8	3.45	3.17	298	7.4
2019	12	12	6	30	0.74	3.85	3.17	318	7.3
2019	12	12	7	0	0.76	3.57	3.14	314	7.3
[truncated: 923 more rows]
