# Supplementary material for: Developing bottom drifters to better understand the stranding locations of cold-stunned sea turtles in Cape Cod Bay, Massachusetts
Source: PeerJ. 2023 Aug 30;11:e15866. doi: 10.7717/peerj.15866 (PMC10474834; doi:10.7717/peerj.15866)
Supplement: Supplemental Information 24 — This dataset shows the locations and species ID of cold-stunned sea turtles were recovered during the 2019 stranding season. [file peerj-11-15866-s024.xlsx]

## Sheet: Data
ID	Species	Rescue Date	Status (When Found)	State	Town	Location	Latitude	Longitude
ST2019-396	Dc	2020-01-18		MA	Chilmark	Menemsha	41.3569	-70.7651
ST2019-158	Lk	2019-11-17	A	MA	Duxbury	By 1st Crossover	42.0464	-70.6408
ST2019-390	Cc	2019-12-16	D	MA	Bourne	Winsor Cove in Cataumet	41.6707	-70.6266
ST2019-259	Cc	2019-11-26	D	MA	Plymouth	Saquish	42.0038	-70.6226
ST2019-341	Lk	2019-12-03	D	MA	Sandwich	Scusset beach	41.7806	-70.4993
ST2019-327	Lk	2019-12-02	A	MA	Sandwich	Town Neck Beach	41.7666	-70.482
ST2019-350	Lk	2019-12-03	D	MA	Sandwich	Town Neck Beach	41.7668	-70.4817
ST2019-187	Lk	2019-11-18	A	MA	Sandwich	Town Neck	41.7653	-70.4792
ST2019-340	Lk	2019-12-03	A	MA	Sandwich	Salt Marsh Rd.	41.7564	-70.4556
ST2019-233	Lk	2019-11-21	D	MA	East Sandwich	Spring Hill	41.7559	-70.4529
ST2019-330	Cc	2019-12-02	A	MA	Sandwich	East Sandwich Beach	41.7536	-70.4462
ST2019-329	Lk	2019-12-02	A	MA	Sandwich	East Sandwich Beach	41.7536	-70.4462
ST2019-325	Cc	2019-12-02	A	MA	Sandwich	East Sandwich Beach	41.7536	-70.4462
ST2019-175	Lk	2019-11-18	A	MA	Sandwich	E Sandwich/Craven's Landing	41.7503	-70.4342
ST2019-373	Lk	2019-12-06	D	MA	Sandwich	Craven's Landing	41.749	-70.4298
ST2019-162	Lk	2019-11-17	A	MA	Sandwich	Craven's Landing	41.7477	-70.4297
ST2019-180	Cm	2019-11-18	A	MA	Sandwich	E Sandwich/Craven's Landing	41.748	-70.4291
ST2019-179	Lk	2019-11-18	A	MA	Sandwich	E Sandwich/Craven's Landing	41.748	-70.4291
ST2019-184	Lk	2019-11-18	A	MA	Sandwich	E Sandwich/Craven's Landing	41.748	-70.4291
ST2019-169	Lk	2019-11-17	A	MA	Sandwich	Torrey Beach	41.7455	-70.4192
ST2019-319	Lk	2019-12-02	A	MA	Barnstable	Sandwich side of Sandy Neck	41.7431	-70.4067
ST2019-320	Lk	2019-12-02	A	MA	Barnstable	Sandwich side of Sandy Neck	41.7431	-70.4067
ST2019-398	Lk	2020-02-16	D	MA	Barnstable	Sandy Neck - East	41.7387	-70.3757
ST2019-161	Lk	2019-11-17	A	MA	Barnstable	Sandy Neck	41.7377	-70.3684
ST2019-166	Lk	2019-11-17	A	MA	Barnstable	Sandy Neck	41.7377	-70.3684
ST2019-167	Lk	2019-11-17	A	MA	Barnstable	Sandy Neck	41.7377	-70.3684
ST2019-168	Lk	2019-11-17	A	MA	Barnstable	Sandy Neck	41.7377	-70.3684
ST2019-174	Lk	2019-11-18	A	MA	Barnstable	Sandy Neck	41.7377	-70.3684
ST2019-176	Lk	2019-11-18	A	MA	Barnstable	Sandy Neck	41.7377	-70.3684
ST2019-177	Lk	2019-11-18	A	MA	Barnstable	Sandy Neck	41.7377	-70.3684
ST2019-178	Lk	2019-11-18	A	MA	Barnstable	Sandy Neck	41.7377	-70.3684
ST2019-181	Lk	2019-11-18	A	MA	Barnstable	Sandy Neck	41.7377	-70.3684
ST2019-182	Lk	2019-11-18	A	MA	Barnstable	Sandy Neck	41.7377	-70.3684
ST2019-183	Lk	2019-11-18	A	MA	Barnstable	Sandy Neck	41.7377	-70.3684
ST2019-188	Lk	2019-11-18	A	MA	Barnstable	Sandy Neck	41.7377	-70.3684
ST2019-189	Lk	2019-11-18	A	MA	Barnstable	Sandy Neck	41.7377	-70.3684
ST2019-190	Lk	2019-11-18	A	MA	Barnstable	Sandy Neck	41.7377	-70.3684
ST2019-191	Lk	2019-11-18	A	MA	Barnstable	Sandy Neck	41.7377	-70.3684
ST2019-192	Lk	2019-11-18	A	MA	Barnstable	Sandy Neck	41.7377	-70.3684
ST2019-193	Lk	2019-11-18	A	MA	Barnstable	Sandy Neck	41.7377	-70.3684
ST2019-214	Cm	2019-11-19	A	MA	Barnstable	Sandy Neck	41.7377	-70.3684
ST2019-200	Lk	2019-11-19	A	MA	Barnstable	Sandy Neck	41.7377	-70.3684
ST2019-201	Lk	2019-11-19	A	MA	Barnstable	Sandy Neck	41.7377	-70.3684
ST2019-213	Lk	2019-11-19	A	MA	Barnstable	Sandy Neck	41.7377	-70.3684
ST2019-198	Lk	2019-11-19	D	MA	Sandwich	Sandy Neck	41.7377	-70.3684
ST2019-203	Lk	2019-11-19	A	MA	Sandwich	Sandy Neck	41.7377	-70.3684
ST2019-204	Lk	2019-11-19	A	MA	Sandwich	Sandy Neck	41.7377	-70.3684
ST2019-205	Lk	2019-11-19	A	MA	Sandwich	Sandy Neck	41.7377	-70.3684
ST2019-206	Lk	2019-11-19	A	MA	Sandwich	Sandy Neck	41.7377	-70.3684
ST2019-207	Lk	2019-11-19	A	MA	Sandwich	Sandy Neck	41.7377	-70.3684
ST2019-210	Lk	2019-11-19	A	MA	Sandwich	Sandy Neck	41.7377	-70.3684
ST2019-212	Lk	2019-11-19	D	MA	Sandwich	Sandy Neck	41.7377	-70.3684
ST2019-195	Lk	2019-11-19	A	MA	Sandwich		41.7377	-70.3684
ST2019-197	Lk	2019-11-19	A	MA	Sandwich		41.7377	-70.3684
ST2019-199	Lk	2019-11-19	A	MA	Sandwich		41.7377	-70.3684
ST2019-202	Lk	2019-11-19	A	MA	Sandwich		41.7377	-70.3684
ST2019-234	Lk	2019-11-21	A	MA	Barnstable	Sandy Neck	41.7377	-70.3684
ST2019-235	Lk	2019-11-21	A	MA	Barnstable	Sandy Neck	41.7377	-70.3684
ST2019-236	Lk	2019-11-21	A	MA	Barnstable	Sandy Neck	41.7377	-70.3684
ST2019-237	Lk	2019-11-21	A	MA	Barnstable	Sandy Neck	41.7377	-70.3684
ST2019-238	Lk	2019-11-21	A	MA	Barnstable	Sandy Neck	41.7377	-70.3684
ST2019-241	Lk	2019-11-21	A	MA	Barnstable	Sandy Neck	41.7377	-70.3684
ST2019-282	Lk	2019-11-29	A	MA	Barnstable	Sandy Neck	41.7377	-70.3684
ST2019-304	Lk	2019-11-30	D	MA	Barnstable	Sandy Neck	41.7377	-70.3684
ST2019-310	Lk	2019-12-01	A	MA	Barnstable	Sandy Neck	41.7377	-70.3684
ST2019-321	Cc	2019-12-02	A	MA	Barnstable	Sandy Neck	41.7377	-70.3684
ST2019-326	Cc	2019-12-02	A	MA	Barnstable	Sandy Neck	41.7377	-70.3684
ST2019-322	Lk	2019-12-02	A	MA	Barnstable	Sandy Neck	41.7377	-70.3684
ST2019-323	Lk	2019-12-02	D	MA	Barnstable	Sandy Neck	41.7377	-70.3684
ST2019-328	Lk	2019-12-02	A	MA	Barnstable	Sandy Neck	41.7377	-70.3684
ST2019-331	Cc	2019-12-03	A	MA	Barnstable	Sandy Neck	41.7377	-70.3684
ST2019-344	Cc	2019-12-03	A	MA	Barnstable	Sandy Neck	41.7377	-70.3684
ST2019-338	Cc	2019-12-03	A	MA	Sandwich	Sandy Neck	41.7377	-70.3684
ST2019-345	hybrid	2019-12-03	A	MA	Barnstable	Sandy Neck	41.7377	-70.3684
ST2019-332	Lk	2019-12-03	A	MA	Barnstable	Sandy Neck	41.7377	-70.3684
ST2019-333	Lk	2019-12-03	A	MA	Barnstable	Sandy Neck	41.7377	-70.3684
ST2019-334	Lk	2019-12-03	A	MA	Barnstable	Sandy Neck	41.7377	-70.3684
ST2019-335	Lk	2019-12-03	A	MA	Barnstable	Sandy Neck	41.7377	-70.3684
ST2019-337	Lk	2019-12-03	A	MA	Barnstable	Sandy Neck	41.7377	-70.3684
ST2019-342	Lk	2019-12-03	A	MA	Barnstable	Sandy Neck	41.7377	-70.3684
ST2019-343	Lk	2019-12-03	A	MA	Barnstable	Sandy Neck	41.7377	-70.3684
ST2019-346	Lk	2019-12-03	D	MA	Barnstable	Sandy Neck	41.7377	-70.3684
ST2019-347	Lk	2019-12-03	D	MA	Barnstable	Sandy Neck	41.7377	-70.3684
ST2019-336	Lk	2019-12-03	A	MA	Sandwich	Sandy Neck	41.7377	-70.3684
ST2019-339	Lk	2019-12-03	A	MA	Sandwich	Sandy Neck	41.7377	-70.3684
ST2019-354	Lk	2019-12-05	D	MA	Barnstable	Sandy Neck	41.7377	-70.3684
ST2019-371	Lk	2019-12-07	D	MA	Barnstable	Sandy Neck	41.7377	-70.3684
ST2019-384	Lk	2019-12-13	D	MA	Barnstable	Sandy Neck	41.7377	-70.3684
ST2019-385	Lk	2019-12-13	D	MA	Barnstable	Sandy Neck	41.7377	-70.3684
ST2019-157	Cm	2019-11-17	A	MA	Barnstable	Sandy Neck, 1 mile east of entrance	41.7371	-70.3589
ST2019-353	Lk	2019-12-04	D	MA	Barnstable		41.7366	-70.353
ST2019-318	Lk	2019-12-01	D	MA	Barnstable	Sandy Neck-Barnstable Harbor	41.7364	-70.3397
ST2019-217	Lk	2019-11-19	A	MA	Barnstable	Scudders Lane	41.7099	-70.3227
ST2019-222	Cc	2019-11-20	A	MA	Barnstable	Harris Meadow	41.7098	-70.3159
ST2019-324	Lk	2019-12-02	D	MA	Barnstable	Barnstable Harbor (Freezer Rd.)	41.7064	-70.3003
ST2019-239	Lk	2019-11-21	A	MA	Barnstable	Sandy Neck-4 miles down beach	41.7348	-70.2995
ST2019-288	Lk	2019-11-29	A	MA	Barnstable	Millway	41.7089	-70.2981
ST2019-289	Lk	2019-11-29	A	MA	Barnstable	Millway	41.7089	-70.2981
ST2019-280	Lk	2019-11-23	D	MA	Barnstable	Millway < 100 yds to right	41.7093	-70.2967
ST2019-163	Lk	2019-11-17	D	MA	Sandwich	Bone Hill	41.7104	-70.2758
ST2019-211	Lk	2019-11-19	A	MA	Barnstable	Bone Hill Rd	41.7104	-70.2758
ST2019-291	Lk	2019-11-29	A	MA	Barnstable	Bone Hill Rd.	41.7105	-70.2758
ST2019-250	Lk	2019-11-23	A	MA	Yarmouth	Mill Creek- Water St.	41.71	-70.2593
ST2019-389	Lk	2019-12-16	D	MA	Yarmouth	Yarmouth Port, by Thatcher Shore Rd.	41.7219	-70.2461
ST2019-394	Lk	2020-01-10	D	MA	Yarmouth	head of Center Street Marsh	41.711	-70.2419
ST2019-279	Lk	2019-11-29	A	MA	Dennis	Chapin	41.7306	-70.2355
ST2019-301	Lk	2019-11-30	A	MA	Dennis	Chapin	41.7306	-70.2355
ST2019-292	Lk	2019-11-29	A	MA	Yarmouth	Grays Beach- to the right	41.7233	-70.2345
ST2019-186	Lk	2019-11-18	A	MA	Dennis	Chapin Beach	41.7335	-70.2323
ST2019-215	Lk	2019-11-19	A	MA	Dennis	Mayflower	41.7371	-70.2271
ST2019-315	Cc	2019-12-01	A	MA	Dennis	Mayflower	41.7392	-70.224
ST2019-306	Lk	2019-11-30	D	MA	Dennis	Chapin	41.7406	-70.2219
ST2019-302	Lk	2019-11-30	A	MA	Dennis	Mayflower	41.7415	-70.2199
ST2019-303	Lk	2019-11-30	A	MA	Dennis	Mayflower	41.7415	-70.2199
ST2019-147	Lk	2019-11-16	A	MA	Dennis	Mayflower	41.7414	-70.2194
ST2019-172	Lk	2019-11-18	A	MA	Dennis	Mayflower	41.7414	-70.2194
ST2019-283	Lk	2019-11-29	A	MA	Dennis	Bayview	41.7423	-70.2178
ST2019-284	Lk	2019-11-29	A	MA	Dennis	Bayview	41.7423	-70.2178
ST2019-296	Lk	2019-11-30	D	MA	Dennis	Bayview	41.7424	-70.2173
ST2019-297	Lk	2019-11-30	A	MA	Dennis	Bayview	41.7424	-70.2173
ST2019-298	Lk	2019-11-30	A	MA	Dennis	Bayview	41.7424	-70.2173
ST2019-290	Lk	2019-11-29	A	MA	Dennis	Bayview Beach Rd.	41.7428	-70.2162
ST2019-148	Lk	2019-11-16	A	MA	Dennis	Bayview beach	41.7431	-70.2158
ST2019-173	Lk	2019-11-18	A	MA	Dennis	Bayview	41.7429	-70.2157
ST2019-272	Lk	2019-11-29	A	MA	Dennis	Bayview - to the right near rocks near entrance. Was on back, very lively.	41.743	-70.2156
ST2019-271	Lk	2019-11-29	A	MA	Dennis	200 yards E of Bayview; ~10 ft. from rock revetement. On back; lively when turned over.	41.7437	-70.2136
ST2019-311	Lk	2019-12-01	A	MA	Dennis	West of Corporation	41.751	-70.1916
ST2019-312	Lk	2019-12-01	D	MA	Dennis	West of Corporation	41.751	-70.1916
ST2019-313	Lk	2019-12-01	D	MA	Dennis	West of Corporation	41.751	-70.1916
ST2019-314	Lk	2019-12-01	D	MA	Dennis	West of Corporation	41.751	-70.1916
ST2019-391	Lk	2019-12-18	D	MA	Dennis	Corporation Beach- far L end of beach	41.752	-70.1893
ST2019-372	Lk	2019-12-08	D	MA	Dennis	Corporation Beach	41.7519	-70.189
ST2019-164	Lk	2019-11-17	D	MA	Barnstable	Corporation Beach	41.7515	-70.1881
ST2019-170	Lk	2019-11-17	A	MA	Dennis	Corporation Beach	41.7506	-70.1866
ST2019-171	Cm	2019-11-18	D	MA	Dennis	Corporation Beach	41.7506	-70.1866
ST2019-196	Lk	2019-11-19	A	MA	Dennis	Corporation	41.7506	-70.1866
ST2019-208	Lk	2019-11-19	A	MA	Dennis	Corporation Beach	41.7506	-70.1866
ST2019-249	Lk	2019-11-23	A	MA	Dennis	Corporation Beach	41.7506	-70.1866
ST2019-264	Lk	2019-11-29	A	MA	Brewster	Mants	41.7506	-70.1866
ST2019-276	Lk	2019-11-29	A	MA	Brewster	Mants Landing	41.7506	-70.1866
ST2019-277	Lk	2019-11-29	A	MA	Dennis	Corporation	41.7506	-70.1866
ST2019-305	Lk	2019-11-30	D	MA	Dennis	Corporation	41.7506	-70.1866
ST2019-317	Lk	2019-12-01	D	MA	Barnstable	Sandy Neck Point	41.7506	-70.1866
ST2019-316	Lk	2019-12-01	D	MA	Dennis	Corporation	41.7506	-70.1866
ST2019-299	Lk	2019-11-30	A	MA	Dennis	Dr. Lords	41.7507	-70.1823
ST2019-362	Cc	2019-12-06	A	MA	Dennis	Dr. Lord's	41.7514	-70.1788
ST2019-400	Lk	2020-03-28	D	MA	Dennis	E of Dr. Lords, almost to Steven Philips Beach	41.7557	-70.1615
ST2019-349	Lk	2019-12-04	D	MA	Dennis	Harbor Rd. and Stephen Phillips	41.756	-70.1604
ST2019-219	Cm	2019-11-19	D	MA	Dennis	Stephen Phillips Rd. (Sesuit Harbor)	41.7561	-70.1603
ST2019-240	Lk	2019-11-21	D	MA	Dennis	Harborview Beach	41.7563	-70.1565
ST2019-278	Cm	2019-11-29	A	MA	Dennis	Harborview	41.7562	-70.1565
ST2019-218	Lk	2019-11-19	A	MA	Dennis	Cold Storage	41.7567	-70.1532
ST2019-273	Lk	2019-11-29	A	MA	Dennis	Cold Storage	41.7568	-70.1527
ST2019-256	Lk	2019-11-25	D	MA	Dennis	Cold Storage	41.7567	-70.1527
ST2019-286	Lk	2019-11-29	D	MA	Dennis	Cold Storage	41.7565	-70.1526
ST2019-223	Lk	2019-11-20	A	MA	Dennis	Cold Storage	41.7567	-70.1513
ST2019-224	Lk	2019-11-20	D	MA	Dennis	Cold Storage	41.7567	-70.1513
ST2019-248	Lk	2019-11-23	A	MA	Dennis	Cold Storage- 1st rocky pt.	41.7596	-70.1436
ST2019-263	Lk	2019-11-29	A	MA	Dennis	Sea Street- east, past stairs in rocky area	41.7597	-70.1428
ST2019-257	Lk	2019-11-25	D	MA	Dennis	Crowes Pasture	41.7607	-70.1419
ST2019-154	Lk	2019-11-16	A	MA	Dennis	Sea Street Beach	41.6522	-70.1342
ST2019-262	Lk	2019-11-28	A	MA	Dennis	Crowe's Pasture	41.7602	-70.1331
ST2019-281	Lk	2019-11-29	D	MA	Dennis	Crowe's Pasture	41.7601	-70.133
ST2019-156	Lk	2019-11-16	A	MA	Dennis	Crow's Pasture	41.7601	-70.1329
ST2019-379	Cc	2019-12-11	D	MA	Truro	Beach Point	42.055	-70.1318
ST2019-348	Lk	2019-12-03	D	MA	Dennis	Crowe's Pasture- East	41.7593	-70.1289
ST2019-377	Cc	2019-12-10	A	MA	Truro	Between Beach Point and Top Mast	42.0508	-70.1212
ST2019-376	Lk	2019-12-10	A	MA	Truro	Between Beach Point and Top Mast	42.0508	-70.1212
ST2019-382	Cc	2019-12-12	D	MA	Truro	Beach Point- right 200 yards	42.0495	-70.1182
ST2019-352	Lk	2019-12-04	D	MA	Brewster	Paines Creek/Wing Island	41.761	-70.1163
ST2019-287	Lk	2019-11-29	A	MA	Brewster	Robbins Hill-Mants	41.7621	-70.1118
ST2019-228	Lk	2019-11-21	A	MA	Brewster	Mants Landing	41.7622	-70.1106
ST2019-308	Lk	2019-11-30	D	MA	Brewster	Mant's	41.7623	-70.1093
ST2019-126	Lk	2019-11-14	A	MA	Brewster	Mant's Landing, half way to slope break	41.7625	-70.1092
ST2019-155	Lk	2019-11-16	A	MA	Brewster	Mant's Landing	41.7624	-70.1092
ST2019-165	Cm	2019-11-17	A	MA	Nantucket	Jetty Beach	41.2966	-70.1055
ST2019-229	Lk	2019-11-21	A	MA	Brewster	Saints Landing	41.7645	-70.1021
ST2019-230	Lk	2019-11-21	A	MA	Brewster	Saints Landing	41.7645	-70.1021
ST2019-231	Lk	2019-11-21	A	MA	Brewster	Saints Landing	41.7645	-70.1021
ST2019-359	Lk	2019-12-06	A	MA	Brewster	Between Breakwater and Mants	41.7658	-70.0984
ST2019-294	Lk	2019-11-30	D	MA	Brewster	Saints Landing	41.7665	-70.0962
ST2019-266	Lk	2019-11-29	A	MA	Brewster	Breakwater-left	41.7678	-70.0931
ST2019-268	Lk	2019-11-29	A	MA	Brewster	Breakwater-left	41.7678	-70.0931
ST2019-119	Lk	2019-11-13	A	MA	Brewster	Breakwater	41.7686	-70.0842
ST2019-120	Lk	2019-11-13	A	MA	Brewster	Breakwater	41.7686	-70.0842
ST2019-227	Lk	2019-11-21	A	MA	Brewster	Breakwater	41.7686	-70.0842
ST2019-127	Lk	2019-11-14	D	MA	Brewster	Breakwater- East, 1/2 way down slope	41.7686	-70.0842
ST2019-194	Lk	2019-11-19	D	MA	Brewster	Breakwater Beach	41.7685	-70.0841
ST2019-381	Cc	2019-12-12	A	MA	Truro	Great Hollow- 100 yards to the L of the entrance	42.0091	-70.083
ST2019-375	Lk	2019-12-10	D	MA	Truro	Between Corn Hill and Great Hollow	42.0053	-70.0819
ST2019-309	Lk	2019-11-30	A	MA	Brewster	Breakwater	41.7697	-70.0812
ST2019-388	Lk	2019-12-16	D	MA	Truro	Corn Hill, 1/3 down the beach	41.9989	-70.0802
ST2019-270	Cc	2019-11-29	A	MA	Brewster	Breakwater	41.7703	-70.08
ST2019-274	Lk	2019-11-29	D	MA	Brewster	Breakwater - low tide	41.7703	-70.08
ST2019-293	Lk	2019-11-29	A	MA	Brewster	Breakwater	41.7705	-70.0797
ST2019-368	Cc	2019-12-07	A	MA	Truro	Corn Hill	41.9963	-70.0797
ST2019-378	Lk	2019-12-10	D	MA	Truro	Fisher Beach	41.9845	-70.0777
ST2019-361	Cc	2019-12-06	A	MA	Truro	Ryder	41.9612	-70.077
ST2019-130	Lk	2019-11-14	D	MA	Wellfleet	Duck Harbor- 100 yards S	41.9449	-70.0767
ST2019-260	Lk	2019-11-27	D	MA	Wellfleet	Duck Harbor	41.9463	-70.0767
ST2019-356	Lk	2019-12-06	A	MA	Wellfleet	Duck Harbor	41.9455	-70.0766
ST2019-102	Lk	2019-11-09	A	MA	Brewster	.5 mi R from Breakwater	41.7718	-70.0766
ST2019-387	Cc	2019-12-16	A	MA	Truro	Between Fisher and Ryder	41.9727	-70.0765
ST2019-275	Lk	2019-11-29	D	MA	Wellfleet	Duck Harbor - 1/4 mile south - high in wrack	41.9423	-70.0764
ST2019-370	Cc	2019-12-07	D	MA	Wellfleet	Hatch House	41.9558	-70.0763
ST2019-386	Lk	2019-12-14	D	MA	Wellfleet	Duck Harbor to Gut- in wrack line	41.9415	-70.076
ST2019-133	Cm	2019-11-15	A	MA	Wellfleet	Between Duck Harbor and Gut	41.9382	-70.0739
ST2019-380	Cc	2019-12-12	A	MA	Wellfleet	Great Island	41.9285	-70.0731
ST2019-374	Cc	2019-12-10	A	MA	Wellfleet	Great Island	41.9251	-70.0729
ST2019-253	Lk	2019-11-25	A	MA	Wellfleet	Between Duck Harbor and gut	41.9335	-70.0727
ST2019-383	Cc	2019-12-12	A	MA	Wellfleet	North of Blasch	41.9322	-70.0727
ST2019-150	Lk	2019-11-16	A	MA	Wellfleet	Halfway out Great Island	41.9176	-70.0723
ST2019-108	Lk	2019-11-13	A	MA	Wellfleet	Great Island	41.9189	-70.0723
ST2019-360	Lk	2019-12-06	A	MA	Wellfleet	Great Island	41.9189	-70.0723
ST2019-363	Lk	2019-12-06	A	MA	Wellfleet	Great Island	41.9189	-70.0723
ST2019-366	Cc	2019-12-07	A	MA	Wellfleet	Great Island- 1 mile down beach	41.9149	-70.0723
ST2019-258	Lk	2019-11-26	D	MA	Wellfleet	Great Island (by Clay Pit)	41.9101	-70.0722
ST2019-247	Lk	2019-11-23	D	MA	Wellfleet	Great Island- at overlook; between Little Beach Hill and Jeremy Pt.	41.8992	-70.0712
ST2019-139	Cm	2019-11-16	A	MA	Wellfleet	3/4 mile from Jeremy Point- at high tide line	41.8937	-70.0706
ST2019-254	Lk	2019-11-25	A	MA	Wellfleet	Great Island, Jeremy Point	41.8931	-70.0702
ST2019-144	Lk	2019-11-16	A	MA	Brewster	Point of Rocks 200 yards right	41.7721	-70.0681
ST2019-351	Lk	2019-12-04	D	MA	Wellfleet	Great Island	41.884	-70.0669
ST2019-145	Lk	2019-11-16	A	MA	Brewster	Point of Rocks	41.7728	-70.0648
ST2019-153	Lk	2019-11-16	A	MA	Brewster	Point of Rocks	41.7728	-70.0648
ST2019-226	Lk	2019-11-21	A	MA	Brewster	Point of Rocks	41.7728	-70.0648
ST2019-265	Lk	2019-11-29	A	MA	Brewster	Point of Rocks	41.7728	-70.0648
ST2019-267	Lk	2019-11-29	A	MA	Brewster	Point of Rocks	41.7728	-70.0648
ST2019-358	Lk	2019-12-06	A	MA	Brewster	Point of Rocks	41.7728	-70.0648
ST2019-131	Lk	2019-11-14	D	MA	Brewster	Ellis Landing/Point of Rocks	41.7736	-70.0628
ST2019-143	Lk	2019-11-16	A	MA	Brewster	Ellis Landing	41.7759	-70.055
ST2019-104	Lk	2019-11-10	A	MA	Wellfleet	NE corner of Great Island	41.9219	-70.0545
ST2019-295	Lk	2019-11-30	D	MA	Brewster	Ellis Landing	41.7766	-70.0529
ST2019-232	Lk	2019-11-21	D	MA	Brewster	Linnel Landing	41.7788	-70.0459
ST2019-225	Lk	2019-11-20	D	MA	Brewster	1/2 way between Linnell Landing and sea wall- near Spruce Hill	41.7812	-70.0402
ST2019-269	Lk	2019-11-29	A	MA	Brewster	Linnell- 1/4 mile to the left	41.7813	-70.04
ST2019-285	Lk	2019-11-29	D	MA	Brewster	Linnell	41.782	-70.0384
ST2019-121	Lk	2019-11-13	A	MA	Brewster	Linnell	41.7822	-70.0381
ST2019-124	Cm	2019-11-14	A	MA	Brewster	Linnell	41.7822	-70.0381
ST2019-122	Lk	2019-11-14	A	MA	Brewster	Linnell	41.7822	-70.0381
ST2019-123	Lk	2019-11-14	A	MA	Brewster	Linnell	41.7822	-70.0381
ST2019-125	Lk	2019-11-14	D	MA	Brewster	Crosby Landing	41.7841	-70.0339
ST2019-117	Cm	2019-11-13	A	MA	Brewster	Crosby Landing	41.784	-70.0338
ST2019-149	Lk	2019-11-16	A	MA	Barnstable	Mayo Beach-across from Bookstore	41.9299	-70.0326
ST2019-109	Lk	2019-11-13	A	MA	Wellfleet	Indian Neck	41.9245	-70.032
ST2019-113	Lk	2019-11-13	D	MA	Brewster	Crosby Landing	41.7858	-70.0304
ST2019-364	Lk	2019-12-07	D	MA	Brewster	Crosby Landing	41.7861	-70.0299
ST2019-307	Lk	2019-11-30	A	MA	Brewster	Crosby	41.7865	-70.0292
ST2019-128	Lk	2019-11-14	D	MA	Wellfleet	Indian Neck- Hiawatha Rd.	41.9147	-70.0281
ST2019-401	Lk	2020-04-03	D	MA	Wellfleet	Indian Neck, Sewells Gutter	41.9143	-70.0269
ST2019-216	Lk	2019-11-19	D	MA	Wellfleet	Indian Neck	41.9135	-70.0269
ST2019-395	Lk	2020-01-18	D	MA	Wellfleet	Duck Creek- beach at end of Richman Ln.	41.9302	-70.0233
ST2019-392	Lk	2019-12-23	D	MA	Wellfleet	Chipman's Cove	41.9195	-70.0228
ST2019-152	Lk	2019-11-16	A	MA	Wellfleet	NW corner of Lieutenant Island	41.9003	-70.021
ST2019-397	Lk	2020-02-15	D	MA	Orleans	Skaket	41.7949	-70.0167
ST2019-114	Lk	2019-11-13	A	MA	Orleans	Skaket Beach	41.795	-70.0166
ST2019-243	Lk	2019-11-23	A	MA	Orleans	Skaket Beach- to R of creek, upside down	41.7963	-70.0133
ST2019-365	Lk	2019-12-07	A	MA	Orleans	Rock Harbor-midway to inlet	41.7988	-70.0113
ST2019-355	Cc	2019-12-06	A	MA	Orleans	Rock Harbor	41.7996	-70.0097
ST2019-132	Lk	2019-11-15	A	MA	Eastham	South Sunken Meadow- right of parking lot, first house	41.8728	-70.0091
ST2019-261	Lk	2019-11-27	D	MA	Eastham	South Sunken Meadow	41.8731	-70.0091
ST2019-142	Cm	2019-11-16	A	MA	Eastham	Dyer Prince	41.801	-70.0089
ST2019-251	Lk	2019-11-25	A	MA	Eastham	Dyer Prince-Rock Harbor	41.801	-70.0088
ST2019-300	Lk	2019-11-30	D	MA	Eastham	Dyer Prince	41.8011	-70.0088
ST2019-160	Cm	2019-11-17	D	MA	Eastham	Dyer Prince- at end of path	41.8011	-70.0087
ST2019-159	Lk	2019-11-17	D	MA	Eastham	Dyer Prince- at end of path	41.8011	-70.0087
ST2019-151	Lk	2019-11-16	A	MA	Eastham	South Sunken Meadow- half mile up Harmes Way	41.8768	-70.0087
ST2019-136	Lk	2019-11-16	A	MA	Orleans	Rock Harbor	41.8	-70.0087
ST2019-185	Lk	2019-11-18	D	MA	Orleans	Rock Harbor	41.8	-70.0087
ST2019-141	Lk	2019-11-16	A	MA	Eastham	South Sunken Meadow-at end of Harmes way	41.8778	-70.0081
ST2019-106	Lk	2019-11-12	A	MA	Eastham	between Cooks Brook and Silver Spring	41.8637	-70.0081
ST2019-107	Lk	2019-11-12	A	MA	Eastham	between Cooks Brook and Silver Spring	41.8637	-70.0081
ST2019-138	Lk	2019-11-16	D	MA	Eastham	Cook's Brook	41.865	-70.0081
ST2019-101	Cm	2019-11-09	D	MA	Eastham	S Sunken Meadow, end of Harmes Way	41.878	-70.0081
ST2019-146	Lk	2019-11-16	D	MA	Eastham	Silver Spring, south of staircase	41.8629	-70.0077
ST2019-134	Lk	2019-11-15	A	MA	Eastham	Just south of Silver Spring	41.8625	-70.0076
ST2019-118	Lk	2019-11-13	A	MA	Eastham	N of Campground, near revetment	41.852	-70.0064
ST2019-116	Lk	2019-11-13	A	MA	Eastham	Dyer Prince	41.801	-70.0064
ST2019-115	Lk	2019-11-13	A	MA	Eastham	Dyer Prince	41.8011	-70.0063
ST2019-357	Lk	2019-12-06	A	MA	Eastham	Boat Meadow (near Dyer Priner Rd.)	41.8043	-70.0062
ST2019-367	Lk	2019-12-07	D	MA	Eastham	Campground Beach	41.851	-70.0062
ST2019-140	Lk	2019-11-16	A	MA	Eastham	Campground Beach- 1/8 mile south of landing	41.8489	-70.006
ST2019-135	Lk	2019-11-16	A	MA	Eastham	Thumpertown- southern end	41.8333	-70.0042
ST2019-137	Lk	2019-11-16	A	MA	Eastham	First Encounter Beach- southern end	41.8215	-70.004
ST2019-242	Lk	2019-11-22	D	MA	Eastham	First Encounter Beach	41.8182	-70.004
ST2019-369	Lk	2019-12-07	D	MA	Eastham	First Encounter	41.8213	-70.004
ST2019-209	Lk	2019-11-19	D	MA	Eastham	First Encounter	41.8197	-70.004
ST2019-105	Lk	2019-11-12	A	MA	Eastham	Cole Rd Landing	41.8304	-70.0039
ST2019-110	Lk	2019-11-13	A	MA	Eastham	Cole Rd Landing	41.8304	-70.0039
ST2019-111	Lk	2019-11-13	D	MA	Eastham	Cole Rd Landing	41.8304	-70.0039
ST2019-112	Lk	2019-11-13	A	MA	Eastham	Cole Rd Landing	41.8304	-70.0039
ST2019-103	Lk	2019-11-09	A	MA	Eastham	Boat Meadow Beach in front of parking lot	41.8065	-70.0025
ST2019-244	Lk	2019-11-23	A	MA	Eastham	Boat Meadow	41.8065	-70.0024
ST2019-245	Lk	2019-11-23	A	MA	Eastham	Boat Meadow	41.8065	-70.0024
ST2019-246	Lk	2019-11-23	A	MA	Eastham	Boat Meadow	41.8065	-70.0024
ST2019-252	Cm	2019-11-25	A	MA	Eastham	Boat Meadow	41.8065	-70.0024
ST2019-255	Lk	2019-11-25	D	MA	Eastham	N of Boat Meadow	41.8074	-70.0017
ST2019-129	Cm	2019-11-14	D	MA	Wellfleet	Lieutentant Island- Lt. Island Rd.- upside down in rocky marsh area	41.8973	-69.9937
ST2019-393	Lk	2019-12-26	D	MA	Orleans	Mill Pond- off of Grandview dr. landing (15 ft. to the right)	41.7941	-69.945
ST2019-220	Lk	2019-11-19	D	MA	Eastham	Boat Meadow	41.8065	70.0023
ST2019-399	Dc	2020-03-21
ST2019-221
